# Supplementary material for: Eocene Loranthaceae pollen pushes back divergence ages for major splits in the family
Source: PeerJ. 2017 Jun 7;5:e3373. doi: 10.7717/peerj.3373 (PMC5466002; doi:10.7717/peerj.3373)
Supplement: Supplemental Information 2 — Tabulation of used data; see sheet Content for further details. [file peerj-05-3373-s002.xlsx]

## Sheet: Content
File S2. Available and used sequence data of Loranthaceae
Sheet	Content
Content	Overview about the contents of this file
Overview	Sequences included in the harvest, sorted by species and gene regions
NUAS	Number of unambiguously defined sites (NUAS) per gene region and species
Hostlist	'Host-associate' list (cf. Göker & Grimm, 2008) for computing species-consensus sequences (Step 2 of analysis pipeline)
FullHarvest (copied from Grímsson et al. 2017, file S2)	Accessions available in gene banks with metainfo read out from the NCBI GenBank flatfiles; included are also accessions added to gene banks after the harvest (highlighted by yellow backgrounds)

## Sheet: Overview
			18S		25S		matK		trnLF		rbcL
Species	Classificiation/clade	Included	AccNo	Voucher	AccNo	Voucher	AccNo	Voucher	AccNo	Voucher	AccNo	Voucher
Actinanthella menyharthii (Engl. & Schinz ex Schinz) Balle	Lorantheae: crown (Tapinanthinae)	Yes (nr+matK)	EU544313	Nickrent_4375	EU544352	Nickrent_4375	EU544408	Nickrent_4375	[no data]	[no data]	[no data]	[no data]
Aetanthus nodosus (Desr.) Engl.	(Psittacantheae): Psittacanthinae	Test (18S only)	EU544314	Nickrent_4561	[no data]	[no data]	[artif. chimera]	[artif. chimera]	[no data]	[no data]	[no data]	[no data]
Agelanthus sansibarensis (Engl.) Polhill & Wiens	Lorantheae: crown (Tapinanthinae)	Yes	U59946	UNKNOWN	EU544353	Nickrent_2987	EU544410	Nickrent_2987	DQ340573	A_Robertson_7365	EU544464	Nickrent_2987
Alepis flavida Tiegh.	Elytrantheae	Yes	L24139	UNKNOWN	EF464474	Nickrent_2743	EF464508	Nickrent_2743	DQ340598, EF464481	Calvin_and_Wilson_NZ98_04, Nickrent_2743	[no data]	[no data]
Amyema cambagei Danser	Lorantheae: Amyeminae	Test (trnLF only)	[no data]	[no data]	[no data]	[no data]	[no data]	[no data]	DQ340582	Calvin_and_Wilson_AU99_01	[no data]	[no data]
Amyema glabra Danser [as ~um in GenBank]	Lorantheae: Amyeminae	Yes	AF039073	UNKNOWN	EU544354	Nickrent_2794	EU544411	Nickrent_2794	EU544476	Nickrent_2794	EU544465	Nickrent_2794
Amyema queenslandica Danser [as ~um in GenBank]	Lorantheae: Amyeminae	Yes	EU544315	Nickrent_2788	EU544355	Nickrent_2788	EU544412	Nickrent_2788	DQ340583	Calvin_and_Wilson_AU02_22	[no data]	[no data]
Amylotheca duthieana Danser	Elytrantheae	Yes	EU544316	Nickrent_4022	EU544356	Nickrent_4022	EU544413	Nickrent_4022	EU544477	Nickrent_4022	[no data]	[no data]
Amylotheca subumbellata Barlow	Elytrantheae	Test (trnLF only)	[no data]	[no data]	[no data]	[no data]	[no data]	[no data]	DQ340600	Calvin_and_Wilson_AU98_21	[no data]	[no data]
Atkinsonia ligustrina F.Muell.	Putative stem group (Gaiadendreae)	Yes	EF464464	Nickrent_4344	EF464475	Nickrent_4344	DQ787444	Nickrent_4343	DQ340616, DQ788714	Calvin_and_Wilson_AU00_01, Nickrent_4343	EF464526	Nickrent_4344
Bakerella sp. Nickrent 4161	Lorantheae: crown (Tapinanthinae)	Yes	EU544318	Nickrent_4161	EU544358	Nickrent_4161	EU544415	Nickrent_4161	EU544479	Nickrent_4161	EU544466	Nickrent_4161
Baratranthus axanthus (Korth.) Miq.	Lorantheae: Amyeminae	Yes (nr+trnLF)	EU544317	Nickrent_4029	EU544357	Nickrent_4029	EU544414	Nickrent_4029	DQ340587, EU544478	Calvin_and_Wilson_B02_14, Nickrent_4029	[no data]	[no data]
Benthamina alyxifolia Tiegh.	Lorantheae: Amyeminae	Yes	EU544319	Nickrent_4127	EU544359	Nickrent_4127	EU544416	Nickrent_4127	DQ340584, EU544480	Calvin_and_Wilson_AU99_14, Nickrent_4127	AY957440	Nickrent_4127
Berhautia senegalensis Balle	Lorantheae: crown (Tapinanthinae)	Yes (nr+matK)	EU544320	Nickrent_4576	EU544360	Nickrent_4576	EU544417	Nickrent_4576	[no data]	[no data]	[no data]	[no data]
Cecarria obtusifolia (Merr.) Barlow	Lorantheae: Loranthinae	Yes	EU544321	Nickrent_4562	EU544361	Nickrent_4562	EU544418	Nickrent_4562	DQ340585; EU544481	Calvin_and_Wilson_AU02_16; Nickrent_4562	EU544467	Nickrent_4562
Cladocolea cupulata Kuijt	(Psittacantheae): Psittacanthinae	Test (trnLF only)	[no data]	[no data]	[no data]	[no data]	[no data]	[no data]	DQ340612	Calvin_and_Wilson_MX03_08	[no data]	[no data]
Cladocolea gracilis Kuijt	(Psittacantheae): Psittacanthinae	Yes	EU544322	Nickrent_3066	EU544362	Nickrent_3066	EU544419	Nickrent_3066	EU544482	Nickrent_3066	[no data]	[no data]
Cladocolea mcvaughii Kuijt	(Psittacantheae): Psittacanthinae	Test (trnLF only)	[no data]	[no data]	[no data]	[no data]	[no data]	[no data]	DQ340611	Calvin_and_Wilson_MX03_09	[no data]	[no data]
Dactyliophora novaeguineae Danser	Lorantheae: Amyeminae	Yes	EU544323	Nickrent_4563	EU544363	Nickrent_4563	EU544420	Nickrent_4563	DQ340586, EU544483	Calvin_and_Wilson_AU02_10, Nickrent_4563	[no data]	[no data]
Decaisnina brittenii Barlow	Elytrantheae	Test (trnLF only)	[no data]	[no data]	[no data]	[no data]	[no data]	[no data]	DQ340595	Calvin_and_Wilson_AU01_11	[no data]	[no data]
Decaisnina congesta Barlow	Elytrantheae	Test (trnLF only)	[no data]	[no data]	[no data]	[no data]	[no data]	[no data]	DQ340594	Calvin_and_Wilson_AU02_01	[no data]	[no data]
Decaisnina hollrungii Barlow	Elytrantheae	No	AF039074	UNKNOWN	[no data]	[no data]	[no data]	[no data]	[no data]	[no data]	[no data]	[no data]
Decaisnina signata Tiegh.	Elytrantheae	Test (trnLF only)	[no data]	[no data]	[no data]	[no data]	[no data]	[no data]	DQ340596	Calvin_and_Wilson_AU02_05	[no data]	[no data]
Decaisnina triflora Tiegh.	Elytrantheae	Yes	EU544324	Nickrent_4491	EU544364	Nickrent_4491	EU544421	Nickrent_4491	EU544484	Nickrent_4491	EU544468	Nickrent_4491
Dendropemon bicolor Krug & Urb.	(Psittacantheae): Psittacanthinae	Yes (nr+matK)	AF039075	UNKNOWN	EU544365	Nickrent_2172	EU544422	Nickrent_2172	[no data]	[no data]	EU544469	Nickrent_2700
Dendrophthoe constricta Danser	Lorantheae: crown (Dendrophthoinae)	Test (trnLF only)	[no data]	[no data]	[no data]	[no data]	[no data]	[no data]	DQ340589	Calvin_and_Wilson_B02_03	[no data]	[no data]
Dendrophthoe curvata Miq.	Lorantheae: crown (Dendrophthoinae)	Yes (nr+matK)	L26491, AY957441, EU544325	UNKNOWN, Nickrent_2787, Nickrent_4012	EU544366, EU544367	Nickrent_4010, Nickrent_4012	EU544424	Nickrent_4012	[no data]	[no data]	[no data]	[no data]
Dendrophthoe lanosa (Korth.) Danser	Lorantheae: crown (Dendrophthoinae)	No	[no data]	[no data]	[no data]	[no data]	[no data]	[no data]	[no data]	[no data]	JN687563	A_Chveerach_P38_1
Dendrophthoe longituba Danser	Lorantheae: crown (Dendrophthoinae)	Yes (cp)	[no data]	[no data]	[no data]	[no data]	EU544423	Nickrent_4010	EU544485	Nickrent_4010	[no data]	[no data]
Dendrophthoe nilgherrensis (Wight & Arn.) Tiegh.	Lorantheae: crown (Dendrophthoinae)	No	[no data]	[no data]	[no data]	[no data]	[no data]	[no data]	[no data]	[no data]	JQ933297	Chase_17409_K
Dendrophthoe pentandra (L.) Miq.	Lorantheae: crown (Dendrophthoinae)	No	[no data]	[no data]	[no data]	[no data]	[no data]	[no data]	[no data]	[no data]	HQ317759…60, HQ317760	LS27/LS32, A_Chveerach_P51_2
Dendrophthoe vitellina Tiegh.	Lorantheae: crown (Dendrophthoinae)	Test (trnLF only)	[no data]	[no data]	[no data]	[no data]	[no data]	[no data]	DQ340588	Calvin_and_Wilson_AU98_08	[no data]	[no data]
Desmaria mutabilis (Poepp. & Endl.) Tiegh. ex B.D.Jacks.	(Psittacantheae): (Notantherinae)	Yes	EF464465	Nickrent_4510A	EF464476	Nickrent_4510A	EF464509	Nickrent_4510A	DQ340603; EF464486	Calvin_and_Wilson_CL03_07; Nickrent_4510A	EF464527	Nickrent_4510A
Diplatia furcata Barlow	Lorantheae: Amyeminae	Yes (18S+cp)	L24088	UNKNOWN	EU544368	Nickrent_2824	EU544425	Nickrent_2824	EU544486	Nickrent_2824	[no data]	[no data]
Diplatia grandibractea Tiegh.	Lorantheae: Amyeminae	Test (trnLF only)	[no data]	[no data]	[no data]	[no data]	[no data]	[no data]	DQ340581	Calvin_and_Wilson_AU01_05	[no data]	[no data]
Emelianthe panganensis (Engl.) Danser	Lorantheae: crown: Emelianthinae	Yes (nr+matK)	EU544326	Nickrent_4889	EU544369	Nickrent_4889	EU544426	Nickrent_4889	EU544487	Nickrent_4889	[no data]	[no data]
Englerina ramulosa (Sprague) Polhill & Wiens	Lorantheae: crown (Tapinanthinae)	Yes (25S+cp)	[no data]	[no data]	EU544370	Nickrent_2984	EU544427	Nickrent_2984	DQ340577	A_Robertson_7280	EU544470	Nickrent_2984
Englerina woodfordioides (Schweinf.) Balle ex M.G. Gilbert	Lorantheae: crown (Tapinanthinae)	Test (18S only)	L24140	UNKNOWN	[no data]	[no data]	[no data]	[no data]	[no data]	[no data]	[no data]	[no data]
Erianthemum dregei (Eckl. & Zeyh.) Tiegh.	Lorantheae: crown: Emelianthinae	Yes	L25679	UNKNOWN	EU544371	Nickrent_2985	EU544428	Nickrent_2985	DQ340580; EU544488	A__Robertson_7366; Nickrent_2985	[no data]	[no data]
Gaiadendron punctatum (Ruiz & Pav.) G.Don	Putative stem group (Gaiadendreae)	Yes	L24143	UNKNOWN	DQ790209	D__Nickrent_2729	DQ787445	Nickrent_2729	DQ340617, DQ788715	Calvin_and_Wilson_CR01_08, Nickrent_2729	L26072	UNKNOWN
Globimetula dinklagei (Engl.) Danser	Lorantheae: crown: Emelianthinae	Yes	AF039076	UNKNOWN	EU544372	Nickrent_3087	EU544429	Nickrent_3087	EU544489	Nickrent_3087	[no data]	[no data]
Helicanthes elastica (Desv.) Danser	Lorantheae: Amyeminae	Test (matK only)	EU544328	Nickrent_4906	EU544375	Nickrent_4906	EU544432	Nickrent_4906	[no data]	[no data]	[no data]	[no data]
Helixanthera coccinea (Jack) Danser	Lorantheae: crown (Dendrophthoinae)	Yes (25S+cp)	[no data]	[no data]	EU544373	Nickrent_4019	EU544430	Nickrent_4019	EU544490	Nickrent_4019	[no data]	[no data]
Helixanthera cylindrica Danser	Lorantheae: crown (Dendrophthoinae)	Yes (nr+matK)	EU544327	Nickrent_4037	EU544374	Nickrent_4037	EU544431	Nickrent_4037	[no data]	[no data]	[no data]	[no data]
Helixanthera kirkii (Oliv.) Danser	Lorantheae: crown (Dendrophthoinae)	Test (18S+trnLF)	AF039077	UNKNOWN	[no data]	[no data]	[no data]	[no data]	[no data]	[no data]	[no data]	[no data]
Helixanthera parasitica Lour.	Lorantheae: crown (Dendrophthoinae)	Test (trnLF only)	[no data]	[no data]	[no data]	[no data]	[no data]	[no data]	DQ340572	Calvin_and_Wilson_B02_01	HQ317761…64; JN687565	LS28…LS31; A_Chveerach_P93_3
Helixanthera sampsonii (Hance) Danser	Lorantheae: crown (Dendrophthoinae)	No	[no data]	[no data]	[no data]	[no data]	[no data]	[no data]	[no data]	[no data]	HQ317765...66	LS33...34
Ileostylus micranthus Tiegh.	Lorantheae: Ileostylinae	Yes	EU544329	Nickrent_2741	EU544376	Nickrent_2741	EU544433	Nickrent_2741	DQ340592; EU544491	Calvin_and_Wilson_NZ00_02; Nickrent_2741	EU544471	Nickrent_2741
Ixocactus inornus (B.L.Rob. & Greenm.) Kuijt [= Phthirusa ~a (B.L.Rob. & Greenm.) Kuijt]	(Psittacantheae): Psittacanthinae	Test (trnLF only)	[no data]	[no data]	[no data]	[no data]	[no data]	[no data]	DQ340609	Calvin_and_Wilson_MX03_04	[no data]	[no data]
Ixocactus sp Nickrent 4332 [?= Phthirusa]	(Psittacantheae): Psittacanthinae	No	[no data]	[no data]	EU544377	Nickrent_4332	[no data]	[no data]	[no data]	[no data]	[no data]	[no data]
Lepeostegeres lancifolia Danser	Elytrantheae	Test (25S only)	[no data]	[no data]	EU544379	Nickrent_4041	EU544435	Nickrent_4041	[no data]	[no data]	[no data]	[no data]
Lepidaria cf. forbesii Tiegh. [?= L. kingii (King) Danser]	Elytrantheae	Yes (18S+cp)	EU544330	Nickrent_4044	EU544378	Nickrent_4044	EU544434	Nickrent_4044	EU544492	Nickrent_4044	[no data]	[no data]
Lepidaria oviceps Danser	Elytrantheae	Test (trnLF only)	[no data]	[no data]	[no data]	[no data]	[no data]	[no data]	DQ340602	Calvin_and_Wilson_B02_19	[no data]	[no data]
Ligaria cuneifolia (Ruiz & Pav.) Tiegh.	(Psittacantheae): Ligarinae	Yes	L24152	UNKNOWN	EF464477	Nickrent_4567	EF464510	Nickrent_4567	DQ340604; DQ442940	Calvin_and_Wilson_CL03_01; G_Amico_76_BCRU	EF464528	Nickrent_4567
Loranthus delavayi Tiegh.	Lorantheae: Loranthinae	Test (18S only)	JQ613220	UNKNOWN	[no data]	[no data]	[no data]	[no data]	[no data]	[no data]	HQ317767	LS39
Loranthus europaeus Jacq.	Lorantheae: Loranthinae	Yes	L24153	UNKNOWN	EU544380	Nickrent_2849	EU544436	Nickrent_5082	EU544493; HQ917114	Nickrent_2849; GUH_3997	JQ933393	Chase_14152_K
Loranthus grewingkii Boiss.	Lorantheae: Loranthinae	Test (trnLF only)	[no data]	[no data]	[no data]	[no data]	[no data]	[no data]	HQ917115	GUH_3998	[no data]	[no data]
Loranthus kaoi (J.M.Chao) H.S.Kiu	Lorantheae: Loranthinae	Test (18S only)	JQ613221	UNKNOWN	[no data]	[no data]	[no data]	[no data]	[no data]	[no data]	[no data]	[no data]
Loranthus odoratus Wall.	Lorantheae: Loranthinae	Yes (nr+trnLF)	EU544331	Nickrent_4977	EU544381	Nickrent_4977	[no data]	[no data]	EU544494	Nickrent_4977	[no data]	[no data]
Loxanthera speciosa Blume	Elytrantheae	Yes	EU544332	Nickrent_4026	EU544382	Nickrent4026	EU544437	Nickrent_4026	EU544495	Nickrent_4026	[no data]	[no data]
Lysiana exocarpi (Behr) Tiegh.	Elytrantheae	Test (18S only)	L24154	UNKNOWN	[no data]	[no data]	[no data]	[no data]	[no data]	[no data]	[no data]	[no data]
Lysiana filifolia Barlow	Elytrantheae	Yes	EU544333	Nickrent_4449	EU544383	Nickrent_4449	EU544438	Nickrent_4449	EU544496	Nickrent_4449	[no data]	[no data]
Lysiana maritima (Barlow) Barlow	Elytrantheae	Test (trnLF only)	[no data]	[no data]	[no data]	[no data]	[no data]	[no data]	DQ340599	Calvin_and_Wilson_AU98_19	[no data]	[no data]
Macrosolen cochinchinensis (Lour.) Tiegh.	Elytrantheae	Yes	EU544334	Nickrent_4038	EU544384	Nickrent_4038	EU544439	Nickrent_4038	EU544497	Nickrent_4038	HQ317768…70; JN687567; JQ933395	LS05/LS35…36; A_Chveerach_P31; IWJ_Sinclair_DG_Long_5781_E
Macrosolen melintangensis Miq.	Elytrantheae	Test (trnLF only)	[no data]	[no data]	[no data]	[no data]	[no data]	[no data]	DQ340593	Calvin_and_Wilson_B02_17	[no data]	[no data]
Macrosolen tricolor (Lecomte) Danser	Elytrantheae	No	[no data]	[no data]	[no data]	[no data]	[no data]	[no data]	[no data]	[no data]	HQ317771…72	LS37…38
Moquiniella rubra (A.Spreng.) Balle	Lorantheae: crown: Emelianthinae	Yes	AF039078	UNKNOWN	DQ790207	D__Nickrent_3042	DQ790171	D__Nickrent_3042	EF464489	Nickrent_3042	AM235021; DQ790132	RBGK_5742; D_Nickrent_3042
Muellerina celastroides (Schult. & Schult.f.) Tiegh.	Lorantheae: Ileostylinae	Test (trnLF only)	[no data]	[no data]	[no data]	[no data]	[no data]	[no data]	DQ340590	Calvin_and_Wilson_AU99_11	[no data]	[no data]
Muellerina eucalyptoides (DC.) Barlow	Lorantheae: Ileostylinae	Yes	EU544335	Nickrent_4310	EU544385	Nickrent_4310	EU544440	Nickrent_4310	DQ340591; EU544498	Calvin_and_Wilson_AU99_05; Nickrent_4310	EU544472	Nickrent_4310
Notanthera heterophylla (Ruiz & Pav.) G. Don	(Psittacantheae): (Notantherinae)	Yes	EF464466	Nickrent_4372	EF464478	Nickrent_4372	EF464511	Nickrent_4372	DQ340606; DQ442939	Calvin_and_Wilson_Cl03_03; G_Amico_151_BCRU	EF464529	Nickrent_4372
Nuytsia floribunda R.Br.	Putative stem group (Nuytsieae)	Yes	DQ790103	D_Nickrent_2747	DQ790210	D__Nickrent_2747	DQ787446	Nickrent_2747	DQ340618; DQ788716	Calvin_and_Wilson_AU01_22; Nickrent_3080	DQ790134	D_Nickrent_2747
Oedina pendens (Engl. & K.Krause) Polhill & Wiens	Lorantheae: crown (Tapinanthinae)	Yes	EU544336	Nickrent_4329	EU544386	Nickrent_4329	EU544441	Nickrent_4329	EU544499	Nickrent_4329	[no data]	[no data]
Oliverella rubroviridis Tiegh.	Lorantheae: crown: Emelianthinae	Yes (nr+matK)	EU544337	Nickrent_4330	EU544387	Nickrent_4330	EU544442	Nickrent_4330	[no data]	[no data]	[no data]	[no data]
Oncella ambigua (Engl.) Tiegh.	Lorantheae: crown (Tapinanthinae)	Test (18S+matK)	EU544338	Nickrent_4673	[no data]	[no data]	EU544443	Nickrent_4673	[no data]	[no data]	[no data]	[no data]
Oncocalyx schimperi (Hochst. ex A.Rich.) M.G.Gilbert	Lorantheae: crown (Tapinanthinae)	Test (trnLF only)	[no data]	[no data]	[no data]	[no data]	[no data]	[no data]	DQ340574	Calvin_and_Wilson_Y88_02	[no data]	[no data]
Oncocalyx sulfureus (Engl.) Wiens & Polhill	Lorantheae: crown (Tapinanthinae)	Yes	EU544339	Nickrent_2850	EU544388	Nickrent_2850	EU544444	Nickrent_2850	EU544500	Nickrent_2850	[no data]	[no data]
Oryctanthus occidentalis (L.) Eichler	(Psittacantheae): Psittacanthinae	Yes	L24408	UNKNOWN	EU544389	Nickrent_2763	EU544445	Nickrent_2763	DQ340613; EU544501	Calvin_and_Wilson_CR01_11; Nickrent_2763	[no data]	[no data]
Peraxilla tetrapetala (L.f.) Tiegh.	Elytrantheae	Yes	EU544340	Nickrent_2744	EU544390	Nickrent_2744	EU544446	Nickrent_2744	DQ340597, EU544502	Calvin_and_Wilson_NZ98_03, Nickrent_2744	EU544473, JQ933439	Nickrent_2744, P_Douglass_8714_RNG
Phragmanthera crassicaulis (Engl.) Balle	Lorantheae: crown: Emelianthinae	Yes	EU544341	Nickrent_3037	EU544391	Phragmanthera_3037	EU544447	Nickrent_3037	EU544503	Nickrent_3037	[no data]	[no data]
Phragmanthera regularis (Steud. ex Sprague) M.C.Gilbert	Lorantheae: crown: Emelianthinae	Test (trnLF only)	[no data]	[no data]	[no data]	[no data]	[no data]	[no data]	DQ340579	Calvin_and_Wilson_Y88_01	[no data]	[no data]
Phthirusa pyrifolia (Kunth) Eichler [= Passovia ~ (Kunth) Tiegh.]	(Psittacantheae): Psittacanthinae	Yes	L24412	UNKNOWN	EU544392	Nickrent_2762	EU544448	Nickrent_2762	DQ340608; EU544504	Calvin_and_Wilson_CR01_03; Nickrent_2762	[no data]	[no data]
Plicosepalus curviflorus (Benth. ex Oliv.) Tiegh.	Lorantheae: crown (Tapinanthinae)	Test (trnLF only)	[no data]	[no data]	[no data]	[no data]	[no data]	[no data]	DQ340575	Calvin_and_Wilson_Y88_03	[no data]	[no data]
Plicosepalus sagittifolius (Engl.) Danser	Lorantheae: crown (Tapinanthinae)	Yes (nr+matK)	EU544342	Nickrent_2852	EU544393	Nickrent_2852	EU544449	Nickrent_2852	[no data]	[no data]	[no data]	[no data]
Psittacanthus angustifolius Kuijt	(Psittacantheae): Psittacanthinae	Test (18S only)	L24414	UNKNOWN	[no data]	[no data]	[no data]	[no data]	[no data]	[no data]	[no data]	[no data]
Psittacanthus calyculatus (DC.) G.Don	(Psittacantheae): Psittacanthinae	Test (25S+matK)	[no data]	[no data]	EU544394	Nickrent_4043	EU544450	Nickrent_4043	[no data]	[no data]	[no data]	[no data]
Psittacanthus schiedeanus (Schltdl. & Cham.) G.Don	(Psittacantheae): Psittacanthinae	Test (trnLF only)	[no data]	[no data]	[no data]	[no data]	[no data]	[no data]	DQ340610	Calvin_and_Wilson_CR01_09	[no data]	[no data]
Scurrula atropurpurea (Blume) Danser	Lorantheae: crown: Scurrulinae	No	[no data]	[no data]	[no data]	[no data]	[no data]	[no data]	[no data]	[no data]	KF114862	UNKNOWN
Scurrula chingii (W.C.Cheng) H.S.Kiu	Lorantheae: crown: Scurrulinae	No	[no data]	[no data]	[no data]	[no data]	[no data]	[no data]	[no data]	[no data]	HQ317773…74	LS25…26
Scurrula ferruginea (Jack) Danser	Lorantheae: crown: Scurrulinae	Yes	EU544343	Nickrent_4008	EU544395	Nickrent_4008	EU544451	Nickrent_4008	DQ340576; EU544505	Calvin_and_Wilson_B02_02; Nickrent_4008	KF114863	UNKNOWN
Scurrula parasitica L.	Lorantheae: crown: Scurrulinae	Yes (nr+matK)	EU544345	Nickrent_4004	EU544397	Nickrent_4004	EU544453	Nickrent_4004	[no data]	[no data]	HQ317775…79	LS18/LS19/LS57/LS23/LS58
Scurrula pulverulenta (Wall.) G.Don	Lorantheae: crown: Scurrulinae	Yes (nr+matK)	EU544344	Nickrent_4159	EU544396	Nickrent_4159	EU544452	Nickrent_4159	[no data]	[no data]	[no data]	[no data]
Scurrula sp. MF Watson et al.	Lorantheae: crown: Scurrulinae	No	[no data]	[no data]	[no data]	[no data]	[no data]	[no data]	[no data]	[no data]	JQ933474	MF_Watson_et_al_20812115_E
Septulina glauca (Thunb.) Tiegh.	Lorantheae: crown (Tapinanthinae)	Yes (25S+trnLF)	EU544346	Nickrent_4089	EU544398	Nickrent_4089	[no data]	[no data]	EU544506	Nickrent_4089	AM235022	JC_Manning_2925_NBG
Socratina bemarivensis (Lecomte) Balle	Lorantheae: crown (Tapinanthinae)	Yes	EU544347	Nickrent_4179	EU544399	Nickrent_4179	EU544454	Nickrent_4279	EU544507	Nickrent_4179	[no data]	[no data]
Sogerianthe sessiflora (Danser) Danser	Lorantheae: Amyeminae	Yes (25S+cp)	EU544348	Nickrent_4467	EU544400	Nickrent_4467	EU544455	Nickrent_4467	EU544508	Nickrent_4467	[no data]	[no data]
Spragueanella rhamnifolia (Engl.) Balle	Lorantheae: crown: Emelianthinae	Test (matK only)	[no data]	[no data]	EU544401	Nickrent_4674	EU544456	Nickrent_4674	[no data]	[no data]	[no data]	[no data]
Struthanthus oerstedii (Oliv.) Standl.	(Psittacantheae): Psittacanthinae	Yes	L24421	UNKNOWN	EU544402	Nickrent_2728	EU544457	Nickrent_2728	EU544509	Nickrent_2728	[no data]	[no data]
Struthanthus orbicularis (Kunth) Blume	(Psittacantheae): Psittacanthinae	Yes (cp)	[no data]	[no data]	[no data]	[no data]	JQ589640	RE_5125_1	DQ340607	Calvin_and_Wilson_CR01_02	JQ592413…15; JQ594621	BioBot05045/~46/~48; RE_5125_1
Struthanthus sp. RE 5128 1	(Psittacantheae): Psittacanthinae	Test (matK only)	[no data]	[no data]	[no data]	[no data]	JQ589641	RE_5128_1	[no data]	[no data]	JQ594622	RE_5128_1
Struthanthus woodsonii Cufod.	(Psittacantheae): Psittacanthinae	Yes	EU544349	Nickrent_2761	EU544403	Nickrent_2761	EU544458	Nickrent_2761	EU544510	Nickrent_2761	EU544474	Nickrent_2761
Tapinanthus constrictiflorus (Engl.) Danser	Lorantheae: crown (Tapinanthinae)	Yes (25S+cp)	[no data]	[no data]	EU544404	Nickrent_3088	EU544459	Nickrent_3088	EU544511	Nickrent_3088	[no data]	[no data]
Tapinanthus quinquangulus (Engl. & Schinz) Danser	Lorantheae: crown (Tapinanthinae)	Test (18S only)	L24422	UNKNOWN	[no data]	[no data]	[no data]	[no data]	[no data]	[no data]	[no data]	[no data]
Tapinanthus sp. OM825	Lorantheae: crown (Tapinanthinae)	Test (matK only)	[no data]	[no data]	[no data]	[no data]	EU214301	OM825	[no data]	[no data]	EU213529	OM825
Taxillus chinensis (DC.) Danser	Lorantheae: crown: Scurrulinae	Yes	EU544350	Nickrent_4032	EU544405	Nickrent_4032	EU544460	Nickrent_4032	EU544512	Nickrent_4032	HQ317780…90	LS03/LS04/LS06…09/LS52…56
Taxillus limprichtii (Grüning) H.S.Kiu	Lorantheae: crown: Scurrulinae	No	[no data]	[no data]	[no data]	[no data]	[no data]	[no data]	[no data]	[no data]	HQ317791…93	LS12,LS13,LS15
Taxillus nigrans (Hance) Danser	Lorantheae: crown: Scurrulinae	No	[no data]	[no data]	[no data]	[no data]	[no data]	[no data]	[no data]	[no data]	HQ317794…95	LS20…21
Taxillus sclerophyllus Danser	Lorantheae: crown: Scurrulinae	No	[no data]	[no data]	[no data]	[no data]	[no data]	[no data]	[no data]	[no data]	JQ933498	Chase_17408_K
Taxillus sutchuenensis (Lecomte) Danser	Lorantheae: crown: Scurrulinae	No	[no data]	[no data]	[no data]	[no data]	[no data]	[no data]	[no data]	[no data]	HQ317796…99	LS16/LS17/LS10/LS11
Taxillus wiensii Balle ex Polhill	Lorantheae: crown: Scurrulinae	No	[no data]	[no data]	[no data]	[no data]	[no data]	[no data]	DQ340578	A_Robertson_7364	[no data]	[no data]
Tolypanthus involucratus (Roxb.) Blume	Lorantheae: crown (Dendrophthoinae)	Test (matK only)	[no data]	[no data]	[no data]	[no data]	EU544461	Nickrent_4907	[no data]	[no data]	[no data]	[no data]
Tolypanthus maclurei (Merr.) Danser	Lorantheae: crown (Dendrophthoinae)	No	[no data]	[no data]	[no data]	[no data]	[no data]	[no data]	[no data]	[no data]	HQ317757…58	LS01…02
Tripodanthus acutifolius (Ruiz & Pav.) Tiegh.	(Psittacantheae): Psittacanthinae	Yes	L24424	UNKNOWN	EU544406	Nickrent_2969	EU544462	Nickrent_2969	DQ340615; EU544513; HM010425…26/31…41/43…44	Calvin_and_Wilson_AR03_04; Nickrent_4927; Nickrent_4983/ ~4998/ ~5318/ ~5321/ ~5323/ ~5325/ ~5326/ ~5330/ ~5345/ ~5346/ ~5349/ ~5350/ ~5548/ ~5550/ ~5551	EU544475	Nickrent_4927
Tripodanthus belmirensis F.J.Roldán & Kuijt	(Psittacantheae): Psittacanthinae	Test (trnLF only)	[no data]	[no data]	[no data]	[no data]	[no data]	[no data]	HM010427	Nickrent_5050	[no data]	[no data]
Tripodanthus flagellaris (Cham. & Schltdl.) Tiegh.	(Psittacantheae): Psittacanthinae	Test (trnLF only)	[no data]	[no data]	[no data]	[no data]	[no data]	[no data]	DQ340614; HM010428…30/~42/~45/~46	Calvin_and_Wilson_AR03_10; Nickrent_5204/ ~5210/ ~5211/ ~5549/ ~5552/ ~5553	[no data]	[no data]
Tristerix aphyllus (Miers ex DC.) Barlow & Wiens	(Psittacantheae): Ligarinae	Test (trnLF only)	[no data]	[no data]	[no data]	[no data]	[no data]	[no data]	DQ442916…19	G_Amico_97_BCRU/ L_Suarez_sn_BCRU/ G_Amico_162_BCRU/ G_Amico_166_BCRU	[no data]	[no data]
Tristerix chodatianus (Patsch.) Kuijt	(Psittacantheae): Ligarinae	Test (trnLF only)	[no data]	[no data]	[no data]	[no data]	[no data]	[no data]	DQ442938	DN_Smith_Valencia_Gonzales_9536_3337838_MO	[no data]	[no data]
Tristerix corymbosus (L.) Kuijt	(Psittacantheae): Ligarinae	Yes	EF464467	Nickrent_4129	EF464479	Nickrent_4572	EF464512	Nickrent_4129	DQ340605; DQ442920…23; EF464493	Calvin_and_Wilson_CL03_02; G_Amico_80/83/84/96_BCRU; Nickrent_4597A	EF464530	Nickrent_4575E
Tristerix grandiflorus (Ruiz & Pav.) Barlow & Wiens	(Psittacantheae): Ligarinae	Test (trnLF only)	[no data]	[no data]	[no data]	[no data]	[no data]	[no data]	DQ442930…31	Palacios_Neil_Ceron_2547_3672311_MO/ V_Zar_1368_3907304_MO	[no data]	[no data]
Tristerix longebracteatus (Desr.) Barlow & Wiens	(Psittacantheae): Ligarinae	Test (trnLF only)	[no data]	[no data]	[no data]	[no data]	[no data]	[no data]	DQ442932…33	DN_Smith_8288_722877_MO/ D_Fernandez_M_Cerna_P_Villacres_371_5889268_MO	[no data]	[no data]
Tristerix penduliflorus Kuijt	(Psittacantheae): Ligarinae	Test (trnLF only)	[no data]	[no data]	[no data]	[no data]	[no data]	[no data]	DQ442928…29	M_Lewis_35236_4661844_MO/ P_Nunez_8288_720879_MO	[no data]	[no data]
Tristerix peruvianus (Patsch.) Kuijt	(Psittacantheae): Ligarinae	Test (trnLF only)	[no data]	[no data]	[no data]	[no data]	[no data]	[no data]	DQ442934	DN_Smith_M_Buddensiek_10858_3307944__MO	[no data]	[no data]
Tristerix peytonii Kuijt	(Psittacantheae): Ligarinae	Test (trnLF only)	[no data]	[no data]	[no data]	[no data]	[no data]	[no data]	DQ442935	P_Nunez_J_Arque_8287_3632650_MO	[no data]	[no data]
Tristerix pubescens Kuijt	(Psittacantheae): Ligarinae	Test (trnLF only)	[no data]	[no data]	[no data]	[no data]	[no data]	[no data]	DQ442936…37	DN_Smith_M_Buddensiek_11090_3303268_MO/ DN_Smith_11388_3337809_MO	[no data]	[no data]
Tristerix verticillatus (Ruiz & Pav.) Barlow & Wiens	(Psittacantheae): Ligarinae	Test (trnLF only)	[no data]	[no data]	[no data]	[no data]	[no data]	[no data]	DQ442924…27	G_Amico_154/157/158/155_BCRU	[no data]	[no data]
Tupeia antarctica (G.Forst.) Cham. & Schltdl.	(Psittacantheae): Tupeinae	Yes	L24425	UNKNOWN	DQ790208	D__Nickrent_2742	DQ790172	D_Nickrent_2742	DQ340601; EF464494	Calvin_and_Wilson_NZ98_02; Nickrent_2742	DQ790133	D_Nickrent_2742
Vanwykia remota (Baker & Sprague) Wiens	Lorantheae: crown (Tapinanthinae)	Yes	EU544351	Nickrent_4331	EU544407	Nickrent_4331	EU544463	Nickrent_4331	EU544514	Nickrent_4331	[no data]	[no data]
All sequences linked to the same voucher											(Mainly) data from barcoding studies
All five regions covered
One region missing
Two regions missing
Three regions missing
Only one region available
Only problematic data available
Red font: Problematic sequences (cf. initial single-gene trees)
Orange font: Sequence with pseudogenous tendency, tentatively kept.
Dark red font: Cross-placement of Oryctanthus occidentalis and Phthirusa [Passovia] pyrifolia trnLF sequences could indicate that there was a mix up regarding one pair while uploading to GenBank.

## Sheet: NUAS
	Total coverage [%]	Num. Unambig. (18S)	Num. Unambig. (25S)	Num. Unambig. (matK)	Num. Unambig. (trnLF)
Actinanthella menyharthii	0.788692	1643	1843	1452	0
Aetanthus nodosus	0.181281	1135	0	0	0
Agelanthus sansibarensis	0.890593	1753	2107	1377	339
Alepis flavida	0.714582	1750	887	1177	660
Amyema cambagei	0.0945536	0	0	0	592
Amyema glabra	0.895384	1751	1993	1332	530
Amyema queenslandica	0.884843	1674	1982	1338	546
Amylotheca subumbellata	0.092637	0	0	0	580
Amylotheca duthieana	0.829899	1038	2106	1422	630
Atkinsonia ligustrina	0.712825	1665	776	1327	695
Bakerella sp Nickrent 4161	0.911516	1694	2015	1422	576
Baratranthus axanthus	0.697173	1674	2037	0	654
Benthamina alyxifolia	0.950327	1769	2083	1428	670
Berhautia senegalensis	0.833733	1780	2078	1362	0
Cecarria obtusifolia	0.748443	1778	1806	574	528
Cladocolea cupulata	0.111005	0	0	0	695
Cladocolea gracilis	0.868551	1665	1831	1308	634
Cladocolea mcvaughii	0.103019	0	0	0	645
Dactyliophora novaeguineae	0.800831	1232	1727	1431	624
Decaisnina brittenii	0.10222	0	0	0	640
Decaisnina congesta	0.103977	0	0	0	651
Decaisnina signata	0.0974285	0	0	0	610
Decaisnina triflora	0.877336	1575	2045	1290	583
Dendropemon bicolor	0.782143	1755	1788	1354	0
Dendrophthoe curvata	0.656604	1759	1023	1329	0
Dendrophthoe constricta	0.0924772	0	0	0	579
Dendrophthoe longituba	0.648778	0	2027	1449	586
Dendrophthoe vitellina	0.0932758	0	0	0	584
Desmaria mutabilis	0.688868	1694	865	1126	628
Diplatia furcata	0.579141	1746	0	1320	560
Diplatia grandibractea	0.0932758	0	0	0	584
Emelianthe panganensis	0.885322	1661	2037	1232	613
Englerina ramulosa	0.645743	0	2042	1349	652
Englerina woodfordioides	0.279029	1747	0	0	0
Erianthemum dregei	0.931321	1737	2048	1389	657
Gaiadendron punctatum	0.738061	1710	877	1350	684
Globimetula dinklagei	0.928765	1749	2011	1458	597
Helicanthes elastica	0.205558	0	0	1287	0
Helixanthera coccinea	0.64766	0	2100	1309	646
Helixanthera cylindrica	0.663951	1724	1093	1340	0
Helixanthera kirkii	0.278869	1746	0	0	0
Helixanthera parasitica	0.0947133	0	0	0	593
Ileostylus micranthus	0.882766	1785	1735	1380	627
Lepeostegeres lancifolia	0.318	0	1991	0	0
Lepidaria oviceps	0.0947133	0	0	0	593
Lepidaria sp Nickrent 4044	0.570356	1546	0	1407	618
Ligaria cuneifolia	0.69909	1738	888	1143	608
Loranthus delavayi	0.273598	1713	0	0	0
Loranthus europaeus	0.800192	1724	2077	666	543
Loranthus grewingkii	0.0782623	0	0	0	490
Loranthus kaoi	0.273598	1713	0	0	0
Loranthus odoratus	0.626418	1606	1752	0	564
Loxanthera speciosa	0.927328	1779	2051	1386	590
Lysiana exocarpi	0.279029	1747	0	0	0
Lysiana filifolia	0.905766	1726	1973	1378	594
Lysiana maritima	0.100783	0	0	0	631
Macrosolen cochinchinensis	0.928446	1781	2076	1425	531
Macrosolen melintangensis	0.108609	0	0	0	680
Moquiniella rubra	0.697492	1756	880	1150	581
Muellerina celastroides	0.0955119	0	0	0	598
Muellerina eucalyptoides	0.901933	1615	2047	1338	647
Notanthera heterophylla	0.689347	1630	936	1077	673
Nuytsia floribunda	0.779588	1783	871	1352	875
Oedina pendens	0.911196	1725	2088	1374	518
Oliverella rubroviridis	0.785178	1718	1785	1413	0
Oncella ambigua	0.513816	1780	0	1437	0
Oncocalyx schimperi	0.101102	0	0	0	633
Oncocalyx sulfureus	0.89794	1686	1934	1389	613
Oryctanthus occidentalis	0.88612	1650	2134	1368	396
Passovia pyrifolia	0.909759	1692	2097	1263	644
Peraxilla tetrapetala	0.902571	1676	2006	1337	632
Phragmanthera crassicaulis	0.930522	1724	2143	1373	586
Plicosepalus sagittifolius	0.783261	1575	1913	1416	0
Psittacanthus angustifolius	0.279508	1750	0	0	0
Psittacanthus calyculatus	0.461268	0	1634	1254	0
Scurrula ferruginea	0.90912	1676	1993	1449	574
Scurrula parasitica	0.702603	1594	1480	1325	0
Scurrula pulverulenta	0.723527	1711	1487	1332	0
Septulina glauca	0.431401	0	2081	0	620
Socratina bemarivensis	0.850503	1669	1747	1337	572
Sogerianthe sessiflora	0.644306	0	2088	1359	587
Spragueanella rhamnifolia	0.22185	0	0	1389	0
Struthanthus oerstedii	0.919981	1658	2096	1329	677
Struthanthus orbicularis	0.18767	0	0	651	524
Struthanthus woodsonii	0.870787	1696	2036	1134	586
Struthanthus sp RE 5128 1	0.10254	0	0	642	0
Phragmanthera regularis	0.100942	0	0	0	632
Phthirusa inorna	0.106213	0	0	0	665
Plicosepalus curviflorus	0.0969494	0	0	0	607
Psittacanthus schiedeanus	0.0953522	0	0	0	597
Tapinanthus constrictiflorus	0.648618	0	2030	1404	627
Tapinanthus quinquangulus	0.278709	1745	0	0	0
Tapinanthus sp OM825	0.107331	0	0	672	0
Taxillus chinensis	0.906564	1780	1967	1365	564
Tolypanthus involucratus	0.205558	0	0	1287	0
Tripodanthus acutifolius	0.951126	1746	2127	1398	684
Tripodanthus belmirensis	0.10254	0	0	0	642
Tripodanthus flagellaris	0.110366	0	0	0	691
Tristerix aphyllus	0.105414	0	0	0	660
Tristerix chodatianus	0.0998243	0	0	0	625
Tristerix corymbosus	0.694458	1632	874	1136	706
Tristerix grandiflorus	0.101102	0	0	0	633
Tristerix longebracteatus	0.101741	0	0	0	637
Tristerix penduliflorus	0.100144	0	0	0	627
Tristerix peruvianus	0.103498	0	0	0	648
Tristerix peytonii	0.0765054	0	0	0	479
Tristerix pubescens	0.0980674	0	0	0	614
Tristerix verticillatus	0.105734	0	0	0	662
Tupeia antarctica	0.710909	1747	900	1176	628
Vanwykia remota	0.91471	1696	2078	1360	593
	Max.	1785	2143	1458	875	unambiguously defined sites

## Sheet: Hostlist
Matrix	Accession	Status	Species
18S	Actinanthella_menyharthii|EU544313|Nickrent_4375	Unconspicuous	Actinanthella_menyharthii		Actinanthella_menyharthii|EU544313|Nickrent_4375	Actinanthella_menyharthii
matK	Actinanthella_menyharthii|EU544408|Nickrent_4375	Unconspicuous	Actinanthella_menyharthii		Actinanthella_menyharthii|EU544408|Nickrent_4375	Actinanthella_menyharthii
25S	Actinanthella_menyharthii|EU544352|Nickrent_4375	Unconspicuous	Actinanthella_menyharthii		Actinanthella_menyharthii|EU544352|Nickrent_4375	Actinanthella_menyharthii
18S	Aetanthus_nodosus|EU544314|Nickrent_4561	Unconspicuous	Aetanthus_nodosus		Aetanthus_nodosus|EU544314|Nickrent_4561	Aetanthus_nodosus
18S	Agelanthus_sansibarensis|U59946|UNKNOWN	Unconspicuous	Agelanthus_sansibarensis		Agelanthus_sansibarensis|U59946|UNKNOWN	Agelanthus_sansibarensis
matK	Agelanthus_sansibarensis|EU544410|Nickrent_2987	Unconspicuous	Agelanthus_sansibarensis		Agelanthus_sansibarensis|EU544410|Nickrent_2987	Agelanthus_sansibarensis
trnLF	Agelanthus_sansibarensis|DQ340573|A_Robertson_7365	Unconspicuous	Agelanthus_sansibarensis		Agelanthus_sansibarensis|DQ340573|A_Robertson_7365	Agelanthus_sansibarensis
25S	Agelanthus_sansibarensis|EU544353|Nickrent_2987	Unconspicuous	Agelanthus_sansibarensis		Agelanthus_sansibarensis|EU544353|Nickrent_2987	Agelanthus_sansibarensis
18S	Alepis_flavida|L24139|UNKNOWN	Unconspicuous	Alepis_flavida		Alepis_flavida|L24139|UNKNOWN	Alepis_flavida
matK	Alepis_flavida|EF464508|Nickrent_2743	Unconspicuous	Alepis_flavida		Alepis_flavida|EF464508|Nickrent_2743	Alepis_flavida
trnLF	Alepis_flavida|DQ340598|Calvin_and_Wilson_NZ98_04	Unconspicuous	Alepis_flavida		Alepis_flavida|DQ340598|Calvin_and_Wilson_NZ98_04	Alepis_flavida
trnLF	Alepis_flavida|EF464481|Nickrent_2743	Unconspicuous	Alepis_flavida		Alepis_flavida|EF464481|Nickrent_2743	Alepis_flavida
25S	Alepis_flavida|EF464474|Nickrent_2743	Unconspicuous	Alepis_flavida		Alepis_flavida|EF464474|Nickrent_2743	Alepis_flavida
trnLF	Amyema_cambagei|DQ340582|Calvin_and_Wilson_AU99_01	Unconspicuous	Amyema_cambagei		Amyema_cambagei|DQ340582|Calvin_and_Wilson_AU99_01	Amyema_cambagei
18S	Amyema_glabrum|AF039073|UNKNOWN	Unconspicuous	Amyema_glabra		Amyema_glabrum|AF039073|UNKNOWN	Amyema_glabra
matK	Amyema_glabrum|EU544411|Nickrent_2794	Unconspicuous	Amyema_glabra		Amyema_glabrum|EU544411|Nickrent_2794	Amyema_glabra
trnLF	Amyema_glabrum|EU544476|Nickrent_2794	Unconspicuous	Amyema_glabra		Amyema_glabrum|EU544476|Nickrent_2794	Amyema_glabra
25S	Amyema_glabrum|EU544354|Nickrent_2794	Unconspicuous	Amyema_glabra		Amyema_glabrum|EU544354|Nickrent_2794	Amyema_glabra
18S	Amyema_queenslandicum|EU544315|Nickrent_2788	Unconspicuous	Amyema_queenslandica		Amyema_queenslandicum|EU544315|Nickrent_2788	Amyema_queenslandica
matK	Amyema_queenslandicum|EU544412|Nickrent_2788	Unconspicuous	Amyema_queenslandica		Amyema_queenslandicum|EU544412|Nickrent_2788	Amyema_queenslandica
trnLF	Amyema_queenslandicum|DQ340583|Calvin_and_Wilson_AU02_22	Unconspicuous	Amyema_queenslandica		Amyema_queenslandicum|DQ340583|Calvin_and_Wilson_AU02_22	Amyema_queenslandica
25S	Amyema_queenslandicum|EU544355|Nickrent_2788	Unconspicuous	Amyema_queenslandica		Amyema_queenslandicum|EU544355|Nickrent_2788	Amyema_queenslandica
18S	Amylotheca_duthieana|EU544316|Nickrent_4022	Unconspicuous	Amylotheca_duthieana		Amylotheca_duthieana|EU544316|Nickrent_4022	Amylotheca_duthieana
matK	Amylotheca_duthieana|EU544413|Nickrent_4022	Unconspicuous	Amylotheca_duthieana		Amylotheca_duthieana|EU544413|Nickrent_4022	Amylotheca_duthieana
trnLF	Amylotheca_duthieana|EU544477|Nickrent_4022	Unconspicuous	Amylotheca_duthieana		Amylotheca_duthieana|EU544477|Nickrent_4022	Amylotheca_duthieana
25S	Amylotheca_duthieana|EU544356|Nickrent_4022	Unconspicuous	Amylotheca_duthieana		Amylotheca_duthieana|EU544356|Nickrent_4022	Amylotheca_duthieana
trnLF	Amylotheca_subumbellata|DQ340600|Calvin_and_Wilson_AU98_21	Unconspicuous	Amylotheca_subumbellata		Amylotheca_subumbellata|DQ340600|Calvin_and_Wilson_AU98_21	Amylotheca_subumbellata
18S	Atkinsonia_ligustrina|EF464464|Nickrent_4344	Unconspicuous	Atkinsonia_ligustrina		Atkinsonia_ligustrina|EF464464|Nickrent_4344	Atkinsonia_ligustrina
matK	Atkinsonia_ligustrina|DQ787444|Nickrent_4343	Unconspicuous	Atkinsonia_ligustrina		Atkinsonia_ligustrina|DQ787444|Nickrent_4343	Atkinsonia_ligustrina
trnLF	Atkinsonia_ligustrina|DQ340616|Calvin_and_Wilson_AU00_01	Unconspicuous	Atkinsonia_ligustrina		Atkinsonia_ligustrina|DQ340616|Calvin_and_Wilson_AU00_01	Atkinsonia_ligustrina
trnLF	Atkinsonia_ligustrina|DQ788714|Nickrent_4343	Unconspicuous	Atkinsonia_ligustrina		Atkinsonia_ligustrina|DQ788714|Nickrent_4343	Atkinsonia_ligustrina
25S	Atkinsonia_ligustrina|EF464475|Nickrent_4344	Unconspicuous	Atkinsonia_ligustrina		Atkinsonia_ligustrina|EF464475|Nickrent_4344	Atkinsonia_ligustrina
25S	Bakerella_sp_|EU544358|Nickrent_4161	Unconspicuous	Bakerella_sp_Nickrent_4161		Bakerella_sp_|EU544358|Nickrent_4161	Bakerella_sp_Nickrent_4161
18S	Bakerella_sp_|EU544318|Nickrent_4161	Unconspicuous	Bakerella_sp_Nickrent_4161		Bakerella_sp_|EU544318|Nickrent_4161	Bakerella_sp_Nickrent_4161
matK	Bakerella_sp_|EU544415|Nickrent_4161	Unconspicuous	Bakerella_sp_Nickrent_4161		Bakerella_sp_|EU544415|Nickrent_4161	Bakerella_sp_Nickrent_4161
trnLF	Bakerella_sp_|EU544479|Nickrent_4161	Unconspicuous	Bakerella_sp_Nickrent_4161		Bakerella_sp_|EU544479|Nickrent_4161	Bakerella_sp_Nickrent_4161
18S	Baratranthus_axanthus|EU544317|Nickrent_4029	Unconspicuous	Baratranthus_axanthus		Baratranthus_axanthus|EU544317|Nickrent_4029	Baratranthus_axanthus
matK	Baratranthus_axanthus|EU544414|Nickrent_4029	Problematic	Baratranthus_axanthus		Baratranthus_axanthus|EU544414|Nickrent_4029	_REMOVED_
trnLF	Baratranthus_axanthus|DQ340587|Calvin_and_Wilson_B02_14	Unconspicuous	Baratranthus_axanthus		Baratranthus_axanthus|DQ340587|Calvin_and_Wilson_B02_14	Baratranthus_axanthus
trnLF	Baratranthus_axanthus|EU544478|Nickrent_4029	Unconspicuous	Baratranthus_axanthus		Baratranthus_axanthus|EU544478|Nickrent_4029	Baratranthus_axanthus
25S	Baratranthus_axanthus|EU544357|Nickrent_4029	Unconspicuous	Baratranthus_axanthus		Baratranthus_axanthus|EU544357|Nickrent_4029	Baratranthus_axanthus
18S	Benthamina_alyxifolia|EU544319|Nickrent_4127	Unconspicuous	Benthamina_alyxifolia		Benthamina_alyxifolia|EU544319|Nickrent_4127	Benthamina_alyxifolia
matK	Benthamina_alyxifolia|EU544416|Nickrent_4127	Unconspicuous	Benthamina_alyxifolia		Benthamina_alyxifolia|EU544416|Nickrent_4127	Benthamina_alyxifolia
trnLF	Benthamina_alyxifolia|DQ340584|Calvin_and_Wilson_AU99_14	Unconspicuous	Benthamina_alyxifolia		Benthamina_alyxifolia|DQ340584|Calvin_and_Wilson_AU99_14	Benthamina_alyxifolia
trnLF	Benthamina_alyxifolia|EU544480|Nickrent_4127	Unconspicuous	Benthamina_alyxifolia		Benthamina_alyxifolia|EU544480|Nickrent_4127	Benthamina_alyxifolia
25S	Benthamina_alyxifolia|EU544359|Nickrent_4127	Unconspicuous	Benthamina_alyxifolia		Benthamina_alyxifolia|EU544359|Nickrent_4127	Benthamina_alyxifolia
18S	Berhautia_senegalensis|EU544320|Nickrent_4576	Unconspicuous	Berhautia_senegalensis		Berhautia_senegalensis|EU544320|Nickrent_4576	Berhautia_senegalensis
matK	Berhautia_senegalensis|EU544417|Nickrent_4576	Unconspicuous	Berhautia_senegalensis		Berhautia_senegalensis|EU544417|Nickrent_4576	Berhautia_senegalensis
25S	Berhautia_senegalensis|EU544360|Nickrent_4576	Unconspicuous	Berhautia_senegalensis		Berhautia_senegalensis|EU544360|Nickrent_4576	Berhautia_senegalensis
18S	Cecarria_obtusifolia|EU544321|Nickrent_4562	Unconspicuous	Cecarria_obtusifolia		Cecarria_obtusifolia|EU544321|Nickrent_4562	Cecarria_obtusifolia
matK	Cecarria_obtusifolia|EU544418|Nickrent_4562	Unconspicuous	Cecarria_obtusifolia		Cecarria_obtusifolia|EU544418|Nickrent_4562	Cecarria_obtusifolia
trnLF	Cecarria_obtusifolia|DQ340585|Calvin_and_Wilson_AU02_16	Unconspicuous	Cecarria_obtusifolia		Cecarria_obtusifolia|DQ340585|Calvin_and_Wilson_AU02_16	Cecarria_obtusifolia
trnLF	Cecarria_obtusifolia|EU544481|Nickrent_4562	Unconspicuous	Cecarria_obtusifolia		Cecarria_obtusifolia|EU544481|Nickrent_4562	Cecarria_obtusifolia
25S	Cecarria_obtusifolia|EU544361|Nickrent_4562	Unconspicuous	Cecarria_obtusifolia		Cecarria_obtusifolia|EU544361|Nickrent_4562	Cecarria_obtusifolia
trnLF	Cladocolea_cupulata|DQ340612|Calvin_and_Wilson_MX03_08	Unconspicuous	Cladocolea_cupulata		Cladocolea_cupulata|DQ340612|Calvin_and_Wilson_MX03_08	Cladocolea_cupulata
18S	Cladocolea_gracilis|EU544322|Nickrent_3066	Unconspicuous	Cladocolea_gracilis		Cladocolea_gracilis|EU544322|Nickrent_3066	Cladocolea_gracilis
matK	Cladocolea_gracilis|EU544419|Nickrent_3066	Unconspicuous	Cladocolea_gracilis		Cladocolea_gracilis|EU544419|Nickrent_3066	Cladocolea_gracilis
trnLF	Cladocolea_gracilis|EU544482|Nickrent_3066	Unconspicuous	Cladocolea_gracilis		Cladocolea_gracilis|EU544482|Nickrent_3066	Cladocolea_gracilis
25S	Cladocolea_gracilis|EU544362|Nickrent_3066	Unconspicuous	Cladocolea_gracilis		Cladocolea_gracilis|EU544362|Nickrent_3066	Cladocolea_gracilis
trnLF	Cladocolea_mcvaughii|DQ340611|Calvin_and_Wilson_MX03_09	Unconspicuous	Cladocolea_mcvaughii		Cladocolea_mcvaughii|DQ340611|Calvin_and_Wilson_MX03_09	Cladocolea_mcvaughii
25S	Dactyliophora_novae_guineae|EU544363|Nickrent_4563	Unconspicuous	Dactyliophora_novaeguineae		Dactyliophora_novae_guineae|EU544363|Nickrent_4563	Dactyliophora_novaeguineae
18S	Dactyliophora_novae_guineae|EU544323|Nickrent_4563	Unconspicuous	Dactyliophora_novaeguineae		Dactyliophora_novae_guineae|EU544323|Nickrent_4563	Dactyliophora_novaeguineae
matK	Dactyliophora_novae_guineae|EU544420|Nickrent_4563	Unconspicuous	Dactyliophora_novaeguineae		Dactyliophora_novae_guineae|EU544420|Nickrent_4563	Dactyliophora_novaeguineae
trnLF	Dactyliophora_novae_guineae|DQ340586|Calvin_and_Wilson_AU02_10	Unconspicuous	Dactyliophora_novaeguineae		Dactyliophora_novae_guineae|DQ340586|Calvin_and_Wilson_AU02_10	Dactyliophora_novaeguineae
trnLF	Dactyliophora_novae_guineae|EU544483|Nickrent_4563	Unconspicuous	Dactyliophora_novaeguineae		Dactyliophora_novae_guineae|EU544483|Nickrent_4563	Dactyliophora_novaeguineae
trnLF	Decaisnina_brittenii|DQ340595|Calvin_and_Wilson_AU01_11	Unconspicuous	Decaisnina_brittenii		Decaisnina_brittenii|DQ340595|Calvin_and_Wilson_AU01_11	Decaisnina_brittenii
trnLF	Decaisnina_congesta|DQ340594|Calvin_and_Wilson_AU02_01	Unconspicuous	Decaisnina_congesta		Decaisnina_congesta|DQ340594|Calvin_and_Wilson_AU02_01	Decaisnina_congesta
18S	Decaisnina_hollrungii|AF039074|UNKNOWN	Problematic	Decaisnina_hollrungii		Decaisnina_hollrungii|AF039074|UNKNOWN	_REMOVED_
trnLF	Decaisnina_signata|DQ340596|Calvin_and_Wilson_AU02_05	Unconspicuous	Decaisnina_signata		Decaisnina_signata|DQ340596|Calvin_and_Wilson_AU02_05	Decaisnina_signata
18S	Decaisnina_triflora|EU544324|Nickrent_4491	Unconspicuous	Decaisnina_triflora		Decaisnina_triflora|EU544324|Nickrent_4491	Decaisnina_triflora
matK	Decaisnina_triflora|EU544421|Nickrent_4491	Unconspicuous	Decaisnina_triflora		Decaisnina_triflora|EU544421|Nickrent_4491	Decaisnina_triflora
trnLF	Decaisnina_triflora|EU544484|Nickrent_4491	Unconspicuous	Decaisnina_triflora		Decaisnina_triflora|EU544484|Nickrent_4491	Decaisnina_triflora
25S	Decaisnina_triflora|EU544364|Nickrent_4491	Unconspicuous	Decaisnina_triflora		Decaisnina_triflora|EU544364|Nickrent_4491	Decaisnina_triflora
18S	Dendropemon_bicolor|AF039075|UNKNOWN	Unconspicuous	Dendropemon_bicolor		Dendropemon_bicolor|AF039075|UNKNOWN	Dendropemon_bicolor
matK	Dendropemon_bicolor|EU544422|Nickrent_2172	Unconspicuous	Dendropemon_bicolor		Dendropemon_bicolor|EU544422|Nickrent_2172	Dendropemon_bicolor
25S	Dendropemon_bicolor|EU544365|Nickrent_2172	Unconspicuous	Dendropemon_bicolor		Dendropemon_bicolor|EU544365|Nickrent_2172	Dendropemon_bicolor
trnLF	Dendrophthoe_constricta|DQ340589|Calvin_and_Wilson_B02_03	Unconspicuous	Dendrophthoe_constricta		Dendrophthoe_constricta|DQ340589|Calvin_and_Wilson_B02_03	Dendrophthoe_constricta
18S	Dendrophthoe_curvata|AY957441|Nickrent_2787	Unconspicuous	Dendrophthoe_curvata		Dendrophthoe_curvata|AY957441|Nickrent_2787	Dendrophthoe_curvata
18S	Dendrophthoe_curvata|EU544325|Nickrent_4012	Unconspicuous	Dendrophthoe_curvata		Dendrophthoe_curvata|EU544325|Nickrent_4012	Dendrophthoe_curvata
18S	Dendrophthoe_curvata|L26491|UNKNOWN	Unconspicuous	Dendrophthoe_curvata		Dendrophthoe_curvata|L26491|UNKNOWN	Dendrophthoe_curvata
matK	Dendrophthoe_curvata|EU544424|Nickrent_4012	Unconspicuous	Dendrophthoe_curvata		Dendrophthoe_curvata|EU544424|Nickrent_4012	Dendrophthoe_curvata
25S	Dendrophthoe_curvata|EU544367|Nickrent_4012	Unconspicuous	Dendrophthoe_curvata		Dendrophthoe_curvata|EU544367|Nickrent_4012	Dendrophthoe_curvata
matK	Dendrophthoe_longituba|EU544423|Nickrent_4010	Unconspicuous	Dendrophthoe_longituba		Dendrophthoe_longituba|EU544423|Nickrent_4010	Dendrophthoe_longituba
trnLF	Dendrophthoe_longituba|EU544485|Nickrent_4010	Unconspicuous	Dendrophthoe_longituba		Dendrophthoe_longituba|EU544485|Nickrent_4010	Dendrophthoe_longituba
25S	Dendrophthoe_longituba|EU544366|Nickrent_4010	Unconspicuous	Dendrophthoe_longituba		Dendrophthoe_longituba|EU544366|Nickrent_4010	Dendrophthoe_longituba
trnLF	Dendrophthoe_vitellina|DQ340588|Calvin_and_Wilson_AU98_08	Unconspicuous	Dendrophthoe_vitellina		Dendrophthoe_vitellina|DQ340588|Calvin_and_Wilson_AU98_08	Dendrophthoe_vitellina
18S	Desmaria_mutabilis|EF464465|Nickrent_4510A	Unconspicuous	Desmaria_mutabilis		Desmaria_mutabilis|EF464465|Nickrent_4510A	Desmaria_mutabilis
matK	Desmaria_mutabilis|EF464509|Nickrent_4510A	Unconspicuous	Desmaria_mutabilis		Desmaria_mutabilis|EF464509|Nickrent_4510A	Desmaria_mutabilis
trnLF	Desmaria_mutabilis|DQ340603|Calvin_and_Wilson_CL03_07	Unconspicuous	Desmaria_mutabilis		Desmaria_mutabilis|DQ340603|Calvin_and_Wilson_CL03_07	Desmaria_mutabilis
trnLF	Desmaria_mutabilis|EF464486|Nickrent_4510A	Unconspicuous	Desmaria_mutabilis		Desmaria_mutabilis|EF464486|Nickrent_4510A	Desmaria_mutabilis
25S	Desmaria_mutabilis|EF464476|Nickrent_4510A	Unconspicuous	Desmaria_mutabilis		Desmaria_mutabilis|EF464476|Nickrent_4510A	Desmaria_mutabilis
18S	Diplatia_furcata|L24088|UNKNOWN	Unconspicuous	Diplatia_furcata		Diplatia_furcata|L24088|UNKNOWN	Diplatia_furcata
matK	Diplatia_furcata|EU544425|Nickrent_2824	Unconspicuous	Diplatia_furcata		Diplatia_furcata|EU544425|Nickrent_2824	Diplatia_furcata
trnLF	Diplatia_furcata|EU544486|Nickrent_2824	Unconspicuous	Diplatia_furcata		Diplatia_furcata|EU544486|Nickrent_2824	Diplatia_furcata
25S	Diplatia_furcata|EU544368|Nickrent_2824	Problematic	Diplatia_furcata		Diplatia_furcata|EU544368|Nickrent_2824	_REMOVED_
trnLF	Diplatia_grandibractea|DQ340581|Calvin_and_Wilson_AU01_05	Unconspicuous	Diplatia_grandibractea		Diplatia_grandibractea|DQ340581|Calvin_and_Wilson_AU01_05	Diplatia_grandibractea
18S	Emelianthe_panganensis|EU544326|Nickrent_4889	Unconspicuous	Emelianthe_panganensis		Emelianthe_panganensis|EU544326|Nickrent_4889	Emelianthe_panganensis
matK	Emelianthe_panganensis|EU544426|Nickrent_4889	Unconspicuous	Emelianthe_panganensis		Emelianthe_panganensis|EU544426|Nickrent_4889	Emelianthe_panganensis
trnLF	Emelianthe_panganensis|EU544487|Nickrent_4889	Unconspicuous	Emelianthe_panganensis		Emelianthe_panganensis|EU544487|Nickrent_4889	Emelianthe_panganensis
25S	Emelianthe_panganensis|EU544369|Nickrent_4889	Unconspicuous	Emelianthe_panganensis		Emelianthe_panganensis|EU544369|Nickrent_4889	Emelianthe_panganensis
matK	Englerina_ramulosa|EU544427|Nickrent_2984	Unconspicuous	Englerina_ramulosa		Englerina_ramulosa|EU544427|Nickrent_2984	Englerina_ramulosa
trnLF	Englerina_ramulosa|DQ340577|A_Robertson_7280	Unconspicuous	Englerina_ramulosa		Englerina_ramulosa|DQ340577|A_Robertson_7280	Englerina_ramulosa
25S	Englerina_ramulosa|EU544370|Nickrent_2984	Unconspicuous	Englerina_ramulosa		Englerina_ramulosa|EU544370|Nickrent_2984	Englerina_ramulosa
18S	Englerina_woodfordioides|L24140|UNKNOWN	Unconspicuous	Englerina_woodfordioides		Englerina_woodfordioides|L24140|UNKNOWN	Englerina_woodfordioides
18S	Erianthemum_dregei|L25679|UNKNOWN	Unconspicuous	Erianthemum_dregei		Erianthemum_dregei|L25679|UNKNOWN	Erianthemum_dregei
matK	Erianthemum_dregei|EU544428|Nickrent_2985	Unconspicuous	Erianthemum_dregei		Erianthemum_dregei|EU544428|Nickrent_2985	Erianthemum_dregei
trnLF	Erianthemum_dregei|DQ340580|A__Robertson_7366	Unconspicuous	Erianthemum_dregei		Erianthemum_dregei|DQ340580|A__Robertson_7366	Erianthemum_dregei
trnLF	Erianthemum_dregei|EU544488|Nickrent_2985	Unconspicuous	Erianthemum_dregei		Erianthemum_dregei|EU544488|Nickrent_2985	Erianthemum_dregei
25S	Erianthemum_dregei|EU544371|Nickrent_2985	Unconspicuous	Erianthemum_dregei		Erianthemum_dregei|EU544371|Nickrent_2985	Erianthemum_dregei
18S	Gaiadendron_punctatum|L24143|UNKNOWN	Unconspicuous	Gaiadendron_punctatum		Gaiadendron_punctatum|L24143|UNKNOWN	Gaiadendron_punctatum
matK	Gaiadendron_punctatum|DQ787445|Nickrent_2729	Unconspicuous	Gaiadendron_punctatum		Gaiadendron_punctatum|DQ787445|Nickrent_2729	Gaiadendron_punctatum
trnLF	Gaiadendron_punctatum|DQ340617|Calvin_and_Wilson_CR01_08	Unconspicuous	Gaiadendron_punctatum		Gaiadendron_punctatum|DQ340617|Calvin_and_Wilson_CR01_08	Gaiadendron_punctatum
trnLF	Gaiadendron_punctatum|DQ788715|Nickrent_2729	Unconspicuous	Gaiadendron_punctatum		Gaiadendron_punctatum|DQ788715|Nickrent_2729	Gaiadendron_punctatum
25S	Gaiadendron_punctatum|DQ790209|D__Nickrent_2729	Unconspicuous	Gaiadendron_punctatum		Gaiadendron_punctatum|DQ790209|D__Nickrent_2729	Gaiadendron_punctatum
18S	Globimetula_dinklagei|AF039076|UNKNOWN	Unconspicuous	Globimetula_dinklagei		Globimetula_dinklagei|AF039076|UNKNOWN	Globimetula_dinklagei
matK	Globimetula_dinklagei|EU544429|Nickrent_3087	Unconspicuous	Globimetula_dinklagei		Globimetula_dinklagei|EU544429|Nickrent_3087	Globimetula_dinklagei
trnLF	Globimetula_dinklagei|EU544489|Nickrent_3087	Unconspicuous	Globimetula_dinklagei		Globimetula_dinklagei|EU544489|Nickrent_3087	Globimetula_dinklagei
25S	Globimetula_dinklagei|EU544372|Nickrent_3087	Unconspicuous	Globimetula_dinklagei		Globimetula_dinklagei|EU544372|Nickrent_3087	Globimetula_dinklagei
18S	Helicanthes_elastica|EU544328|Nickrent_4906	Problematic	Helicanthes_elastica		Helicanthes_elastica|EU544328|Nickrent_4906	_REMOVED_
matK	Helicanthes_elastica|EU544432|Nickrent_4906	Unconspicuous	Helicanthes_elastica		Helicanthes_elastica|EU544432|Nickrent_4906	Helicanthes_elastica
25S	Helicanthes_elastica|EU544375|Nickrent_4906	Problematic	Helicanthes_elastica		Helicanthes_elastica|EU544375|Nickrent_4906	_REMOVED_
matK	Helixanthera_coccinea|EU544430|Nickrent_4019	Unconspicuous	Helixanthera_coccinea		Helixanthera_coccinea|EU544430|Nickrent_4019	Helixanthera_coccinea
trnLF	Helixanthera_coccinea|EU544490|Nickrent_4019	Unconspicuous	Helixanthera_coccinea		Helixanthera_coccinea|EU544490|Nickrent_4019	Helixanthera_coccinea
25S	Helixanthera_coccinea|EU544373|Nickrent_4019	Unconspicuous	Helixanthera_coccinea		Helixanthera_coccinea|EU544373|Nickrent_4019	Helixanthera_coccinea
18S	Helixanthera_cylindrica|EU544327|Nickrent_4037	Unconspicuous	Helixanthera_cylindrica		Helixanthera_cylindrica|EU544327|Nickrent_4037	Helixanthera_cylindrica
matK	Helixanthera_cylindrica|EU544431|Nickrent_4037	Unconspicuous	Helixanthera_cylindrica		Helixanthera_cylindrica|EU544431|Nickrent_4037	Helixanthera_cylindrica
25S	Helixanthera_cylindrica|EU544374|Nickrent_4037	Unconspicuous	Helixanthera_cylindrica		Helixanthera_cylindrica|EU544374|Nickrent_4037	Helixanthera_cylindrica
18S	Helixanthera_kirkii|AF039077|UNKNOWN	Unconspicuous	Helixanthera_kirkii		Helixanthera_kirkii|AF039077|UNKNOWN	Helixanthera_kirkii
trnLF	Helixanthera_parasitica|DQ340572|Calvin_and_Wilson_B02_01	Unconspicuous	Helixanthera_parasitica		Helixanthera_parasitica|DQ340572|Calvin_and_Wilson_B02_01	Helixanthera_parasitica
18S	Ileostylus_micranthus|EU544329|Nickrent_2741	Unconspicuous	Ileostylus_micranthus		Ileostylus_micranthus|EU544329|Nickrent_2741	Ileostylus_micranthus
matK	Ileostylus_micranthus|EU544433|Nickrent_2741	Unconspicuous	Ileostylus_micranthus		Ileostylus_micranthus|EU544433|Nickrent_2741	Ileostylus_micranthus
trnLF	Ileostylus_micranthus|DQ340592|Calvin_and_Wilson_NZ00_02	Unconspicuous	Ileostylus_micranthus		Ileostylus_micranthus|DQ340592|Calvin_and_Wilson_NZ00_02	Ileostylus_micranthus
trnLF	Ileostylus_micranthus|EU544491|Nickrent_2741	Unconspicuous	Ileostylus_micranthus		Ileostylus_micranthus|EU544491|Nickrent_2741	Ileostylus_micranthus
25S	Ileostylus_micranthus|EU544376|Nickrent_2741	Unconspicuous	Ileostylus_micranthus		Ileostylus_micranthus|EU544376|Nickrent_2741	Ileostylus_micranthus
25S	Ixocactus_sp_|EU544377|Nickrent_4332	Problematic	Phthirusa_sp_Nickrent_4332		Ixocactus_sp_|EU544377|Nickrent_4332	_REMOVED_
matK	Lepeostegeres_lancifolius|EU544435|Nickrent_4041	Problematic	Lepeostegeres_lancifolia		Lepeostegeres_lancifolius|EU544435|Nickrent_4041	_REMOVED_
25S	Lepeostegeres_lancifolius|EU544379|Nickrent_4041	Unconspicuous	Lepeostegeres_lancifolia		Lepeostegeres_lancifolius|EU544379|Nickrent_4041	Lepeostegeres_lancifolia
25S	Lepidaria_cf__forbesii|EU544378|Nickrent_4044	Problematic	Lepidaria_sp_Nickrent_4044		Lepidaria_cf__forbesii|EU544378|Nickrent_4044	_REMOVED_
trnLF	Lepidaria_oviceps|DQ340602|Calvin_and_Wilson_B02_19	Unconspicuous	Lepidaria_oviceps		Lepidaria_oviceps|DQ340602|Calvin_and_Wilson_B02_19	Lepidaria_oviceps
18S	Lepidaria_cf_forbesii|EU544330|Nickrent_4044	Unconspicuous	Lepidaria_sp_Nickrent_4044		Lepidaria_cf_forbesii|EU544330|Nickrent_4044	Lepidaria_sp_Nickrent_4044
matK	Lepidaria_cf__forbesii|EU544434|Nickrent_4044	Unconspicuous	Lepidaria_sp_Nickrent_4044		Lepidaria_cf__forbesii|EU544434|Nickrent_4044	Lepidaria_sp_Nickrent_4044
trnLF	Lepidaria_cf__forbesii|EU544492|Nickrent_4044	Unconspicuous	Lepidaria_sp_Nickrent_4044		Lepidaria_cf__forbesii|EU544492|Nickrent_4044	Lepidaria_sp_Nickrent_4044
18S	Ligaria_cuneifolia|L24152|UNKNOWN	Unconspicuous	Ligaria_cuneifolia		Ligaria_cuneifolia|L24152|UNKNOWN	Ligaria_cuneifolia
matK	Ligaria_cuneifolia|EF464510|Nickrent_4567	Unconspicuous	Ligaria_cuneifolia		Ligaria_cuneifolia|EF464510|Nickrent_4567	Ligaria_cuneifolia
trnLF	Ligaria_cuneifolia|DQ340604|Calvin_and_Wilson_CL03_01	Unconspicuous	Ligaria_cuneifolia		Ligaria_cuneifolia|DQ340604|Calvin_and_Wilson_CL03_01	Ligaria_cuneifolia
trnLF	Ligaria_cuneifolia|DQ442940|G_Amico_76_BCRU	Unconspicuous	Ligaria_cuneifolia		Ligaria_cuneifolia|DQ442940|G_Amico_76_BCRU	Ligaria_cuneifolia
25S	Ligaria_cuneifolia|EF464477|Nickrent_4567	Unconspicuous	Ligaria_cuneifolia		Ligaria_cuneifolia|EF464477|Nickrent_4567	Ligaria_cuneifolia
18S	Loranthus_delavayi|JQ613220|UNKNOWN	Unconspicuous	Loranthus_delavayi		Loranthus_delavayi|JQ613220|UNKNOWN	Loranthus_delavayi
18S	Loranthus_europaeus|L24153|UNKNOWN	Unconspicuous	Loranthus_europaeus		Loranthus_europaeus|L24153|UNKNOWN	Loranthus_europaeus
matK	Loranthus_europaeus|EU544436|Nickrent_5082	Unconspicuous	Loranthus_europaeus		Loranthus_europaeus|EU544436|Nickrent_5082	Loranthus_europaeus
trnLF	Loranthus_europaeus|EU544493|Nickrent_2849	Unconspicuous	Loranthus_europaeus		Loranthus_europaeus|EU544493|Nickrent_2849	Loranthus_europaeus
trnLF	Loranthus_europaeus|HQ917114|GUH_3997	Unconspicuous	Loranthus_europaeus		Loranthus_europaeus|HQ917114|GUH_3997	Loranthus_europaeus
25S	Loranthus_europaeus|EU544380|Nickrent_2849	Unconspicuous	Loranthus_europaeus		Loranthus_europaeus|EU544380|Nickrent_2849	Loranthus_europaeus
trnLF	Loranthus_grewingkii|HQ917115|GUH_3998	Unconspicuous	Loranthus_grewingkii		Loranthus_grewingkii|HQ917115|GUH_3998	Loranthus_grewingkii
18S	Loranthus_kaoi|JQ613221|UNKNOWN	Unconspicuous	Loranthus_kaoi		Loranthus_kaoi|JQ613221|UNKNOWN	Loranthus_kaoi
18S	Loranthus_odoratus|EU544331|Nickrent_4977	Unconspicuous	Loranthus_odoratus		Loranthus_odoratus|EU544331|Nickrent_4977	Loranthus_odoratus
trnLF	Loranthus_odoratus|EU544494|Nickrent_4977	Unconspicuous	Loranthus_odoratus		Loranthus_odoratus|EU544494|Nickrent_4977	Loranthus_odoratus
25S	Loranthus_odoratus|EU544381|Nickrent_4977	Unconspicuous	Loranthus_odoratus		Loranthus_odoratus|EU544381|Nickrent_4977	Loranthus_odoratus
18S	Loxanthera_speciosa|EU544332|Nickrent_4026	Unconspicuous	Loxanthera_speciosa		Loxanthera_speciosa|EU544332|Nickrent_4026	Loxanthera_speciosa
matK	Loxanthera_speciosa|EU544437|Nickrent_4026	Unconspicuous	Loxanthera_speciosa		Loxanthera_speciosa|EU544437|Nickrent_4026	Loxanthera_speciosa
trnLF	Loxanthera_speciosa|EU544495|Nickrent_4026	Unconspicuous	Loxanthera_speciosa		Loxanthera_speciosa|EU544495|Nickrent_4026	Loxanthera_speciosa
25S	Loxanthera_speciosa|EU544382|Nickrent4026	Unconspicuous	Loxanthera_speciosa		Loxanthera_speciosa|EU544382|Nickrent4026	Loxanthera_speciosa
18S	Lysiana_exocarpi|L24154|UNKNOWN	Unconspicuous	Lysiana_exocarpi		Lysiana_exocarpi|L24154|UNKNOWN	Lysiana_exocarpi
18S	Lysiana_filifolia|EU544333|Nickrent_4449	Unconspicuous	Lysiana_filifolia		Lysiana_filifolia|EU544333|Nickrent_4449	Lysiana_filifolia
matK	Lysiana_filifolia|EU544438|Nickrent_4449	Unconspicuous	Lysiana_filifolia		Lysiana_filifolia|EU544438|Nickrent_4449	Lysiana_filifolia
trnLF	Lysiana_filifolia|EU544496|Nickrent_4449	Unconspicuous	Lysiana_filifolia		Lysiana_filifolia|EU544496|Nickrent_4449	Lysiana_filifolia
25S	Lysiana_filifolia|EU544383|Nickrent_4449	Unconspicuous	Lysiana_filifolia		Lysiana_filifolia|EU544383|Nickrent_4449	Lysiana_filifolia
trnLF	Lysiana_maritima|DQ340599|Calvin_and_Wilson_AU98_19	Unconspicuous	Lysiana_maritima		Lysiana_maritima|DQ340599|Calvin_and_Wilson_AU98_19	Lysiana_maritima
18S	Macrosolen_cochinchinensis|EU544334|Nickrent_4038	Unconspicuous	Macrosolen_cochinchinensis		Macrosolen_cochinchinensis|EU544334|Nickrent_4038	Macrosolen_cochinchinensis
matK	Macrosolen_cochinchinensis|EU544439|Nickrent_4038	Unconspicuous	Macrosolen_cochinchinensis		Macrosolen_cochinchinensis|EU544439|Nickrent_4038	Macrosolen_cochinchinensis
trnLF	Macrosolen_cochinchinensis|EU544497|Nickrent_4038	Unconspicuous	Macrosolen_cochinchinensis		Macrosolen_cochinchinensis|EU544497|Nickrent_4038	Macrosolen_cochinchinensis
25S	Macrosolen_cochinchinensis|EU544384|Nickrent_4038	Unconspicuous	Macrosolen_cochinchinensis		Macrosolen_cochinchinensis|EU544384|Nickrent_4038	Macrosolen_cochinchinensis
trnLF	Macrosolen_melintangensis|DQ340593|Calvin_and_Wilson_B02_17	Unconspicuous	Macrosolen_melintangensis		Macrosolen_melintangensis|DQ340593|Calvin_and_Wilson_B02_17	Macrosolen_melintangensis
18S	Moquiniella_rubra|AF039078|UNKNOWN	Unconspicuous	Moquiniella_rubra		Moquiniella_rubra|AF039078|UNKNOWN	Moquiniella_rubra
matK	Moquiniella_rubra|DQ790171|D__Nickrent_3042	Unconspicuous	Moquiniella_rubra		Moquiniella_rubra|DQ790171|D__Nickrent_3042	Moquiniella_rubra
trnLF	Moquiniella_rubra|EF464489|Nickrent_3042	Unconspicuous	Moquiniella_rubra		Moquiniella_rubra|EF464489|Nickrent_3042	Moquiniella_rubra
25S	Moquiniella_rubra|DQ790207|D__Nickrent_3042	Unconspicuous	Moquiniella_rubra		Moquiniella_rubra|DQ790207|D__Nickrent_3042	Moquiniella_rubra
trnLF	Muellerina_celastroides|DQ340590|Calvin_and_Wilson_AU99_11	Unconspicuous	Muellerina_celastroides		Muellerina_celastroides|DQ340590|Calvin_and_Wilson_AU99_11	Muellerina_celastroides
18S	Muellerina_eucalyptoides|EU544335|Nickrent_4310	Unconspicuous	Muellerina_eucalyptoides		Muellerina_eucalyptoides|EU544335|Nickrent_4310	Muellerina_eucalyptoides
matK	Muellerina_eucalyptoides|EU544440|Nickrent_4310	Unconspicuous	Muellerina_eucalyptoides		Muellerina_eucalyptoides|EU544440|Nickrent_4310	Muellerina_eucalyptoides
trnLF	Muellerina_eucalyptoides|DQ340591|Calvin_and_Wilson_AU99_05	Unconspicuous	Muellerina_eucalyptoides		Muellerina_eucalyptoides|DQ340591|Calvin_and_Wilson_AU99_05	Muellerina_eucalyptoides
trnLF	Muellerina_eucalyptoides|EU544498|Nickrent_4310	Unconspicuous	Muellerina_eucalyptoides		Muellerina_eucalyptoides|EU544498|Nickrent_4310	Muellerina_eucalyptoides
25S	Muellerina_eucalyptoides|EU544385|Nickrent_4310	Unconspicuous	Muellerina_eucalyptoides		Muellerina_eucalyptoides|EU544385|Nickrent_4310	Muellerina_eucalyptoides
18S	Notanthera_heterophylla|EF464466|Nickrent_4372	Unconspicuous	Notanthera_heterophylla		Notanthera_heterophylla|EF464466|Nickrent_4372	Notanthera_heterophylla
matK	Notanthera_heterophylla|EF464511|Nickrent_4372	Unconspicuous	Notanthera_heterophylla		Notanthera_heterophylla|EF464511|Nickrent_4372	Notanthera_heterophylla
trnLF	Notanthera_heterophylla|DQ340606|Calvin_and_Wilson_Cl03_03	Unconspicuous	Notanthera_heterophylla		Notanthera_heterophylla|DQ340606|Calvin_and_Wilson_Cl03_03	Notanthera_heterophylla
trnLF	Notanthera_heterophylla|DQ442939|G_Amico_151_BCRU	Unconspicuous	Notanthera_heterophylla		Notanthera_heterophylla|DQ442939|G_Amico_151_BCRU	Notanthera_heterophylla
25S	Notanthera_heterophylla|EF464478|Nickrent_4372	Unconspicuous	Notanthera_heterophylla		Notanthera_heterophylla|EF464478|Nickrent_4372	Notanthera_heterophylla
18S	Nuytsia_floribunda|DQ790103|D_Nickrent_2747	Unconspicuous	Nuytsia_floribunda		Nuytsia_floribunda|DQ790103|D_Nickrent_2747	Nuytsia_floribunda
matK	Nuytsia_floribunda|DQ787446|Nickrent_2747	Unconspicuous	Nuytsia_floribunda		Nuytsia_floribunda|DQ787446|Nickrent_2747	Nuytsia_floribunda
trnLF	Nuytsia_floribunda|DQ340618|Calvin_and_Wilson_AU01_22	Unconspicuous	Nuytsia_floribunda		Nuytsia_floribunda|DQ340618|Calvin_and_Wilson_AU01_22	Nuytsia_floribunda
trnLF	Nuytsia_floribunda|DQ788716|Nickrent_3080	Unconspicuous	Nuytsia_floribunda		Nuytsia_floribunda|DQ788716|Nickrent_3080	Nuytsia_floribunda
25S	Nuytsia_floribunda|DQ790210|D__Nickrent_2747	Unconspicuous	Nuytsia_floribunda		Nuytsia_floribunda|DQ790210|D__Nickrent_2747	Nuytsia_floribunda
18S	Oedina_pendens|EU544336|Nickrent_4329	Unconspicuous	Oedina_pendens		Oedina_pendens|EU544336|Nickrent_4329	Oedina_pendens
matK	Oedina_pendens|EU544441|Nickrent_4329	Unconspicuous	Oedina_pendens		Oedina_pendens|EU544441|Nickrent_4329	Oedina_pendens
trnLF	Oedina_pendens|EU544499|Nickrent_4329	Unconspicuous	Oedina_pendens		Oedina_pendens|EU544499|Nickrent_4329	Oedina_pendens
25S	Oedina_pendens|EU544386|Nickrent_4329	Unconspicuous	Oedina_pendens		Oedina_pendens|EU544386|Nickrent_4329	Oedina_pendens
18S	Oliverella_rubroviridis|EU544337|Nickrent_4330	Unconspicuous	Oliverella_rubroviridis		Oliverella_rubroviridis|EU544337|Nickrent_4330	Oliverella_rubroviridis
matK	Oliverella_rubroviridis|EU544442|Nickrent_4330	Unconspicuous	Oliverella_rubroviridis		Oliverella_rubroviridis|EU544442|Nickrent_4330	Oliverella_rubroviridis
25S	Oliverella_rubroviridis|EU544387|Nickrent_4330	Unconspicuous	Oliverella_rubroviridis		Oliverella_rubroviridis|EU544387|Nickrent_4330	Oliverella_rubroviridis
18S	Oncella_ambigua|EU544338|Nickrent_4673	Unconspicuous	Oncella_ambigua		Oncella_ambigua|EU544338|Nickrent_4673	Oncella_ambigua
matK	Oncella_ambigua|EU544443|Nickrent_4673	Unconspicuous	Oncella_ambigua		Oncella_ambigua|EU544443|Nickrent_4673	Oncella_ambigua
trnLF	Oncocalyx_schimperi|DQ340574|Calvin_and_Wilson_Y88_02	Unconspicuous	Oncocalyx_schimperi		Oncocalyx_schimperi|DQ340574|Calvin_and_Wilson_Y88_02	Oncocalyx_schimperi
18S	Oncocalyx_sulfureus|EU544339|Nickrent_2850	Unconspicuous	Oncocalyx_sulfureus		Oncocalyx_sulfureus|EU544339|Nickrent_2850	Oncocalyx_sulfureus
matK	Oncocalyx_sulfureus|EU544444|Nickrent_2850	Unconspicuous	Oncocalyx_sulfureus		Oncocalyx_sulfureus|EU544444|Nickrent_2850	Oncocalyx_sulfureus
trnLF	Oncocalyx_sulfureus|EU544500|Nickrent_2850	Unconspicuous	Oncocalyx_sulfureus		Oncocalyx_sulfureus|EU544500|Nickrent_2850	Oncocalyx_sulfureus
25S	Oncocalyx_sulfureus|EU544388|Nickrent_2850	Unconspicuous	Oncocalyx_sulfureus		Oncocalyx_sulfureus|EU544388|Nickrent_2850	Oncocalyx_sulfureus
18S	Oryctanthus_occidentalis|L24408|UNKNOWN	Unconspicuous	Oryctanthus_occidentalis		Oryctanthus_occidentalis|L24408|UNKNOWN	Oryctanthus_occidentalis
matK	Oryctanthus_occidentalis|EU544445|Nickrent_2763	Unconspicuous	Oryctanthus_occidentalis		Oryctanthus_occidentalis|EU544445|Nickrent_2763	Oryctanthus_occidentalis
trnLF	Oryctanthus_occidentalis|DQ340613|Calvin_and_Wilson_CR01_11	Possible mixup	Oryctanthus_occidentalis		Oryctanthus_occidentalis|DQ340613|Calvin_and_Wilson_CR01_11	_REMOVED_
trnLF	Oryctanthus_occidentalis|EU544501|Nickrent_2763	Unconspicuous	Oryctanthus_occidentalis		Oryctanthus_occidentalis|EU544501|Nickrent_2763	Oryctanthus_occidentalis
25S	Oryctanthus_occidentalis|EU544389|Nickrent_2763	Unconspicuous	Oryctanthus_occidentalis		Oryctanthus_occidentalis|EU544389|Nickrent_2763	Oryctanthus_occidentalis
18S	Phthirusa_pyrifolia|L24412|UNKNOWN	Unconspicuous	Passovia_pyrifolia		Phthirusa_pyrifolia|L24412|UNKNOWN	Passovia_pyrifolia
matK	Phthirusa_pyrifolia|EU544448|Nickrent_2762	Unconspicuous	Passovia_pyrifolia		Phthirusa_pyrifolia|EU544448|Nickrent_2762	Passovia_pyrifolia
trnLF	Phthirusa_pyrifolia|DQ340608|Calvin_and_Wilson_CR01_03	Possible mixup	Passovia_pyrifolia		Phthirusa_pyrifolia|DQ340608|Calvin_and_Wilson_CR01_03	_REMOVED_
trnLF	Phthirusa_pyrifolia|EU544504|Nickrent_2762	Unconspicuous	Passovia_pyrifolia		Phthirusa_pyrifolia|EU544504|Nickrent_2762	Passovia_pyrifolia
18S	Peraxilla_tetrapetala|EU544340|Nickrent_2744	Unconspicuous	Peraxilla_tetrapetala		Peraxilla_tetrapetala|EU544340|Nickrent_2744	Peraxilla_tetrapetala
matK	Peraxilla_tetrapetala|EU544446|Nickrent_2744	Unconspicuous	Peraxilla_tetrapetala		Peraxilla_tetrapetala|EU544446|Nickrent_2744	Peraxilla_tetrapetala
trnLF	Peraxilla_tetrapetala|DQ340597|Calvin_and_Wilson_NZ98_03	Unconspicuous	Peraxilla_tetrapetala		Peraxilla_tetrapetala|DQ340597|Calvin_and_Wilson_NZ98_03	Peraxilla_tetrapetala
trnLF	Peraxilla_tetrapetala|EU544502|Nickrent_2744	Unconspicuous	Peraxilla_tetrapetala		Peraxilla_tetrapetala|EU544502|Nickrent_2744	Peraxilla_tetrapetala
25S	Peraxilla_tetrapetala|EU544390|Nickrent_2744	Unconspicuous	Peraxilla_tetrapetala		Peraxilla_tetrapetala|EU544390|Nickrent_2744	Peraxilla_tetrapetala
18S	Phragmanthera_crassicaulis|EU544341|Nickrent_3037	Unconspicuous	Phragmanthera_crassicaulis		Phragmanthera_crassicaulis|EU544341|Nickrent_3037	Phragmanthera_crassicaulis
matK	Phragmanthera_crassicaulis|EU544447|Nickrent_3037	Unconspicuous	Phragmanthera_crassicaulis		Phragmanthera_crassicaulis|EU544447|Nickrent_3037	Phragmanthera_crassicaulis
trnLF	Phragmanthera_crassicaulis|EU544503|Nickrent_3037	Unconspicuous	Phragmanthera_crassicaulis		Phragmanthera_crassicaulis|EU544503|Nickrent_3037	Phragmanthera_crassicaulis
25S	Phragmanthera_crassicaulis|EU544391|Phragmanthera_3037	Unconspicuous	Phragmanthera_crassicaulis		Phragmanthera_crassicaulis|EU544391|Phragmanthera_3037	Phragmanthera_crassicaulis
trnLF	Phragmanthera_regularis|DQ340579|Calvin_and_Wilson_Y88_01	Unconspicuous	Phragmanthera_regularis		Phragmanthera_regularis|DQ340579|Calvin_and_Wilson_Y88_01	Phragmanthera_regularis
trnLF	Ixocactus_inornus|DQ340609|Calvin_and_Wilson_MX03_04	Unconspicuous	Phthirusa_inorna		Ixocactus_inornus|DQ340609|Calvin_and_Wilson_MX03_04	Phthirusa_inorna
25S	Phthirusa_pyrifolia|EU544392|Nickrent_2762	Unconspicuous	Passovia_pyrifolia		Phthirusa_pyrifolia|EU544392|Nickrent_2762	Passovia_pyrifolia
trnLF	Plicosepalus_curviflorus|DQ340575|Calvin_and_Wilson_Y88_03	Unconspicuous	Plicosepalus_curviflorus		Plicosepalus_curviflorus|DQ340575|Calvin_and_Wilson_Y88_03	Plicosepalus_curviflorus
18S	Plicosepalus_sagittifolius|EU544342|Nickrent_2852	Unconspicuous	Plicosepalus_sagittifolius		Plicosepalus_sagittifolius|EU544342|Nickrent_2852	Plicosepalus_sagittifolius
matK	Plicosepalus_sagittifolius|EU544449|Nickrent_2852	Unconspicuous	Plicosepalus_sagittifolius		Plicosepalus_sagittifolius|EU544449|Nickrent_2852	Plicosepalus_sagittifolius
25S	Plicosepalus_sagittifolius|EU544393|Nickrent_2852	Unconspicuous	Plicosepalus_sagittifolius		Plicosepalus_sagittifolius|EU544393|Nickrent_2852	Plicosepalus_sagittifolius
18S	Psittacanthus_angustifolius|L24414|UNKNOWN	Unconspicuous	Psittacanthus_angustifolius		Psittacanthus_angustifolius|L24414|UNKNOWN	Psittacanthus_angustifolius
matK	Psittacanthus_calyculatus|EU544450|Nickrent_4043	Unconspicuous	Psittacanthus_calyculatus		Psittacanthus_calyculatus|EU544450|Nickrent_4043	Psittacanthus_calyculatus
25S	Psittacanthus_calyculatus|EU544394|Nickrent_4043	Unconspicuous	Psittacanthus_calyculatus		Psittacanthus_calyculatus|EU544394|Nickrent_4043	Psittacanthus_calyculatus
trnLF	Psittacanthus_schiedeanus|DQ340610|Calvin_and_Wilson_CR01_09	Unconspicuous	Psittacanthus_schiedeanus		Psittacanthus_schiedeanus|DQ340610|Calvin_and_Wilson_CR01_09	Psittacanthus_schiedeanus
18S	Scurrula_ferruginea|EU544343|Nickrent_4008	Unconspicuous	Scurrula_ferruginea		Scurrula_ferruginea|EU544343|Nickrent_4008	Scurrula_ferruginea
matK	Scurrula_ferruginea|EU544451|Nickrent_4008	Unconspicuous	Scurrula_ferruginea		Scurrula_ferruginea|EU544451|Nickrent_4008	Scurrula_ferruginea
trnLF	Scurrula_ferruginea|DQ340576|Calvin_and_Wilson_B02_02	Unconspicuous	Scurrula_ferruginea		Scurrula_ferruginea|DQ340576|Calvin_and_Wilson_B02_02	Scurrula_ferruginea
trnLF	Scurrula_ferruginea|EU544505|Nickrent_4008	Unconspicuous	Scurrula_ferruginea		Scurrula_ferruginea|EU544505|Nickrent_4008	Scurrula_ferruginea
25S	Scurrula_ferruginea|EU544395|Nickrent_4008	Unconspicuous	Scurrula_ferruginea		Scurrula_ferruginea|EU544395|Nickrent_4008	Scurrula_ferruginea
18S	Scurrula_parasitica|EU544345|Nickrent_4004	Unconspicuous	Scurrula_parasitica		Scurrula_parasitica|EU544345|Nickrent_4004	Scurrula_parasitica
matK	Scurrula_parasitica|EU544453|Nickrent_4004	Unconspicuous	Scurrula_parasitica		Scurrula_parasitica|EU544453|Nickrent_4004	Scurrula_parasitica
25S	Scurrula_parasitica|EU544397|Nickrent_4004	Unconspicuous	Scurrula_parasitica		Scurrula_parasitica|EU544397|Nickrent_4004	Scurrula_parasitica
18S	Scurrula_pulverulenta|EU544344|Nickrent_4159	Unconspicuous	Scurrula_pulverulenta		Scurrula_pulverulenta|EU544344|Nickrent_4159	Scurrula_pulverulenta
matK	Scurrula_pulverulenta|EU544452|Nickrent_4159	Unconspicuous	Scurrula_pulverulenta		Scurrula_pulverulenta|EU544452|Nickrent_4159	Scurrula_pulverulenta
25S	Scurrula_pulverulenta|EU544396|Nickrent_4159	Unconspicuous	Scurrula_pulverulenta		Scurrula_pulverulenta|EU544396|Nickrent_4159	Scurrula_pulverulenta
18S	Septulina_glauca|EU544346|Nickrent_4089	Problematic	Septulina_glauca		Septulina_glauca|EU544346|Nickrent_4089	_REMOVED_
trnLF	Septulina_glauca|EU544506|Nickrent_4089	Unconspicuous	Septulina_glauca		Septulina_glauca|EU544506|Nickrent_4089	Septulina_glauca
25S	Septulina_glauca|EU544398|Nickrent_4089	Unconspicuous	Septulina_glauca		Septulina_glauca|EU544398|Nickrent_4089	Septulina_glauca
18S	Socratina_bemarivensis|EU544347|Nickrent_4179	Unconspicuous	Socratina_bemarivensis		Socratina_bemarivensis|EU544347|Nickrent_4179	Socratina_bemarivensis
matK	Socratina_bemarivensis|EU544454|Nickrent_4279	Unconspicuous	Socratina_bemarivensis		Socratina_bemarivensis|EU544454|Nickrent_4279	Socratina_bemarivensis
trnLF	Socratina_bemarivensis|EU544507|Nickrent_4179	Unconspicuous	Socratina_bemarivensis		Socratina_bemarivensis|EU544507|Nickrent_4179	Socratina_bemarivensis
25S	Socratina_bemarivensis|EU544399|Nickrent_4179	Unconspicuous	Socratina_bemarivensis		Socratina_bemarivensis|EU544399|Nickrent_4179	Socratina_bemarivensis
18S	Sogerianthe_sessiflora|EU544348|Nickrent_4467	Problematic	Sogerianthe_sessiflora		Sogerianthe_sessiflora|EU544348|Nickrent_4467	_REMOVED_
matK	Sogerianthe_sessiflora|EU544455|Nickrent_4467	Unconspicuous	Sogerianthe_sessiflora		Sogerianthe_sessiflora|EU544455|Nickrent_4467	Sogerianthe_sessiflora
trnLF	Sogerianthe_sessiflora|EU544508|Nickrent_4467	Unconspicuous	Sogerianthe_sessiflora		Sogerianthe_sessiflora|EU544508|Nickrent_4467	Sogerianthe_sessiflora
25S	Sogerianthe_sessiflora|EU544400|Nickrent_4467	Unconspicuous	Sogerianthe_sessiflora		Sogerianthe_sessiflora|EU544400|Nickrent_4467	Sogerianthe_sessiflora
matK	Spragueanella_rhamnifolia|EU544456|Nickrent_4674	Unconspicuous	Spragueanella_rhamnifolia		Spragueanella_rhamnifolia|EU544456|Nickrent_4674	Spragueanella_rhamnifolia
25S	Spragueanella_rhamnifolia|EU544401|Nickrent_4674	Problematic	Spragueanella_rhamnifolia		Spragueanella_rhamnifolia|EU544401|Nickrent_4674	_REMOVED_
18S	Struthanthus_oerstedii|L24421|UNKNOWN	Unconspicuous	Struthanthus_oerstedii		Struthanthus_oerstedii|L24421|UNKNOWN	Struthanthus_oerstedii
matK	Struthanthus_oerstedii|EU544457|Nickrent_2728	Unconspicuous	Struthanthus_oerstedii		Struthanthus_oerstedii|EU544457|Nickrent_2728	Struthanthus_oerstedii
trnLF	Struthanthus_oerstedii|EU544509|Nickrent_2728	Unconspicuous	Struthanthus_oerstedii		Struthanthus_oerstedii|EU544509|Nickrent_2728	Struthanthus_oerstedii
25S	Struthanthus_oerstedii|EU544402|Nickrent_2728	Unconspicuous	Struthanthus_oerstedii		Struthanthus_oerstedii|EU544402|Nickrent_2728	Struthanthus_oerstedii
matK	Struthanthus_orbicularis|JQ589640|RE_5125_1	Unconspicuous	Struthanthus_orbicularis		Struthanthus_orbicularis|JQ589640|RE_5125_1	Struthanthus_orbicularis
trnLF	Struthanthus_orbicularis|DQ340607|Calvin_and_Wilson_CR01_02	Unconspicuous	Struthanthus_orbicularis		Struthanthus_orbicularis|DQ340607|Calvin_and_Wilson_CR01_02	Struthanthus_orbicularis
matK	Struthanthus_sp_|JQ589641|RE_5128_1	Unconspicuous	Struthanthus_sp_RE_5128_1		Struthanthus_sp_|JQ589641|RE_5128_1	Struthanthus_sp_RE_5128_1
18S	Struthanthus_woodsonii|EU544349|Nickrent_2761	Unconspicuous	Struthanthus_woodsonii		Struthanthus_woodsonii|EU544349|Nickrent_2761	Struthanthus_woodsonii
matK	Struthanthus_woodsonii|EU544458|Nickrent_2761	Unconspicuous	Struthanthus_woodsonii		Struthanthus_woodsonii|EU544458|Nickrent_2761	Struthanthus_woodsonii
trnLF	Struthanthus_woodsonii|EU544510|Nickrent_2761	Unconspicuous	Struthanthus_woodsonii		Struthanthus_woodsonii|EU544510|Nickrent_2761	Struthanthus_woodsonii
25S	Struthanthus_woodsonii|EU544403|Nickrent_2761	Unconspicuous	Struthanthus_woodsonii		Struthanthus_woodsonii|EU544403|Nickrent_2761	Struthanthus_woodsonii
matK	Tapinanthus_constrictiflorus|EU544459|Nickrent_3088	Unconspicuous	Tapinanthus_constrictiflorus		Tapinanthus_constrictiflorus|EU544459|Nickrent_3088	Tapinanthus_constrictiflorus
trnLF	Tapinanthus_constrictiflorus|EU544511|Nickrent_3088	Unconspicuous	Tapinanthus_constrictiflorus		Tapinanthus_constrictiflorus|EU544511|Nickrent_3088	Tapinanthus_constrictiflorus
25S	Tapinanthus_constrictiflorus|EU544404|Nickrent_3088	Unconspicuous	Tapinanthus_constrictiflorus		Tapinanthus_constrictiflorus|EU544404|Nickrent_3088	Tapinanthus_constrictiflorus
18S	Tapinanthus_quinquangulus|L24422|UNKNOWN	Unconspicuous	Tapinanthus_quinquangulus		Tapinanthus_quinquangulus|L24422|UNKNOWN	Tapinanthus_quinquangulus
matK	Tapinanthus_sp_|EU214301|OM825	Unconspicuous	Tapinanthus_sp_OM825		Tapinanthus_sp_|EU214301|OM825	Tapinanthus_sp_OM825
18S	Taxillus_chinensis|EU544350|Nickrent_4032	Unconspicuous	Taxillus_chinensis		Taxillus_chinensis|EU544350|Nickrent_4032	Taxillus_chinensis
matK	Taxillus_chinensis|EU544460|Nickrent_4032	Unconspicuous	Taxillus_chinensis		Taxillus_chinensis|EU544460|Nickrent_4032	Taxillus_chinensis
trnLF	Taxillus_chinensis|EU544512|Nickrent_4032	Unconspicuous	Taxillus_chinensis		Taxillus_chinensis|EU544512|Nickrent_4032	Taxillus_chinensis
25S	Taxillus_chinensis|EU544405|Nickrent_4032	Unconspicuous	Taxillus_chinensis		Taxillus_chinensis|EU544405|Nickrent_4032	Taxillus_chinensis
trnLF	Taxillus_wiensii|DQ340578|A_Robertson_7364	Problematic	Taxillus_wiensii		Taxillus_wiensii|DQ340578|A_Robertson_7364	_REMOVED_
matK	Tolypanthus_involucratus|EU544461|Nickrent_4907	Unconspicuous	Tolypanthus_involucratus		Tolypanthus_involucratus|EU544461|Nickrent_4907	Tolypanthus_involucratus
18S	Tripodanthus_acutifolius|L24424|UNKNOWN	Unconspicuous	Tripodanthus_acutifolius		Tripodanthus_acutifolius|L24424|UNKNOWN	Tripodanthus_acutifolius
matK	Tripodanthus_acutifolius|EU544462|Nickrent_2969	Unconspicuous	Tripodanthus_acutifolius		Tripodanthus_acutifolius|EU544462|Nickrent_2969	Tripodanthus_acutifolius
trnLF	Tripodanthus_acutifolius|DQ340615|Calvin_and_Wilson_AR03_04	Unconspicuous	Tripodanthus_acutifolius		Tripodanthus_acutifolius|DQ340615|Calvin_and_Wilson_AR03_04	Tripodanthus_acutifolius
trnLF	Tripodanthus_acutifolius|EU544513|Nickrent_4927	Unconspicuous	Tripodanthus_acutifolius		Tripodanthus_acutifolius|EU544513|Nickrent_4927	Tripodanthus_acutifolius
trnLF	Tripodanthus_acutifolius|HM010425|Nickrent_4983	Unconspicuous	Tripodanthus_acutifolius		Tripodanthus_acutifolius|HM010425|Nickrent_4983	Tripodanthus_acutifolius
trnLF	Tripodanthus_acutifolius|HM010426|Nickrent_4998	Unconspicuous	Tripodanthus_acutifolius		Tripodanthus_acutifolius|HM010426|Nickrent_4998	Tripodanthus_acutifolius
trnLF	Tripodanthus_acutifolius|HM010431|Nickrent_5318	Unconspicuous	Tripodanthus_acutifolius		Tripodanthus_acutifolius|HM010431|Nickrent_5318	Tripodanthus_acutifolius
trnLF	Tripodanthus_acutifolius|HM010432|Nickrent_5321	Unconspicuous	Tripodanthus_acutifolius		Tripodanthus_acutifolius|HM010432|Nickrent_5321	Tripodanthus_acutifolius
trnLF	Tripodanthus_acutifolius|HM010433|Nickrent_5323	Unconspicuous	Tripodanthus_acutifolius		Tripodanthus_acutifolius|HM010433|Nickrent_5323	Tripodanthus_acutifolius
trnLF	Tripodanthus_acutifolius|HM010434|Nickrent_5325	Unconspicuous	Tripodanthus_acutifolius		Tripodanthus_acutifolius|HM010434|Nickrent_5325	Tripodanthus_acutifolius
trnLF	Tripodanthus_acutifolius|HM010435|Nickrent_5326	Unconspicuous	Tripodanthus_acutifolius		Tripodanthus_acutifolius|HM010435|Nickrent_5326	Tripodanthus_acutifolius
trnLF	Tripodanthus_acutifolius|HM010436|Nickrent_5330	Unconspicuous	Tripodanthus_acutifolius		Tripodanthus_acutifolius|HM010436|Nickrent_5330	Tripodanthus_acutifolius
trnLF	Tripodanthus_acutifolius|HM010437|Nickrent_5345	Unconspicuous	Tripodanthus_acutifolius		Tripodanthus_acutifolius|HM010437|Nickrent_5345	Tripodanthus_acutifolius
trnLF	Tripodanthus_acutifolius|HM010438|Nickrent_5346	Unconspicuous	Tripodanthus_acutifolius		Tripodanthus_acutifolius|HM010438|Nickrent_5346	Tripodanthus_acutifolius
trnLF	Tripodanthus_acutifolius|HM010439|Nickrent_5349	Unconspicuous	Tripodanthus_acutifolius		Tripodanthus_acutifolius|HM010439|Nickrent_5349	Tripodanthus_acutifolius
trnLF	Tripodanthus_acutifolius|HM010440|Nickrent_5350	Unconspicuous	Tripodanthus_acutifolius		Tripodanthus_acutifolius|HM010440|Nickrent_5350	Tripodanthus_acutifolius
trnLF	Tripodanthus_acutifolius|HM010441|Nickrent_5548	Unconspicuous	Tripodanthus_acutifolius		Tripodanthus_acutifolius|HM010441|Nickrent_5548	Tripodanthus_acutifolius
trnLF	Tripodanthus_acutifolius|HM010443|Nickrent_5550	Unconspicuous	Tripodanthus_acutifolius		Tripodanthus_acutifolius|HM010443|Nickrent_5550	Tripodanthus_acutifolius
trnLF	Tripodanthus_acutifolius|HM010444|Nickrent_5551	Unconspicuous	Tripodanthus_acutifolius		Tripodanthus_acutifolius|HM010444|Nickrent_5551	Tripodanthus_acutifolius
25S	Tripodanthus_acutifolius|EU544406|Nickrent_2969	Unconspicuous	Tripodanthus_acutifolius		Tripodanthus_acutifolius|EU544406|Nickrent_2969	Tripodanthus_acutifolius
trnLF	Tripodanthus_belmirensis|HM010427|Nickrent_5050	Unconspicuous	Tripodanthus_belmirensis		Tripodanthus_belmirensis|HM010427|Nickrent_5050	Tripodanthus_belmirensis
trnLF	Tripodanthus_flagellaris|DQ340614|Calvin_and_Wilson_AR03_10	Unconspicuous	Tripodanthus_flagellaris		Tripodanthus_flagellaris|DQ340614|Calvin_and_Wilson_AR03_10	Tripodanthus_flagellaris
trnLF	Tripodanthus_flagellaris|HM010428|Nickrent_5204	Unconspicuous	Tripodanthus_flagellaris		Tripodanthus_flagellaris|HM010428|Nickrent_5204	Tripodanthus_flagellaris
trnLF	Tripodanthus_flagellaris|HM010429|Nickrent_5210	Unconspicuous	Tripodanthus_flagellaris		Tripodanthus_flagellaris|HM010429|Nickrent_5210	Tripodanthus_flagellaris
trnLF	Tripodanthus_flagellaris|HM010430|Nickrent_5211	Unconspicuous	Tripodanthus_flagellaris		Tripodanthus_flagellaris|HM010430|Nickrent_5211	Tripodanthus_flagellaris
trnLF	Tripodanthus_flagellaris|HM010442|Nickrent_5549	Unconspicuous	Tripodanthus_flagellaris		Tripodanthus_flagellaris|HM010442|Nickrent_5549	Tripodanthus_flagellaris
trnLF	Tripodanthus_flagellaris|HM010445|Nickrent_5552	Unconspicuous	Tripodanthus_flagellaris		Tripodanthus_flagellaris|HM010445|Nickrent_5552	Tripodanthus_flagellaris
trnLF	Tripodanthus_flagellaris|HM010446|Nickrent_5553	Unconspicuous	Tripodanthus_flagellaris		Tripodanthus_flagellaris|HM010446|Nickrent_5553	Tripodanthus_flagellaris
trnLF	Tristerix_aphyllus|DQ442916|G_Amico_97_BCRU	Unconspicuous	Tristerix_aphyllus		Tristerix_aphyllus|DQ442916|G_Amico_97_BCRU	Tristerix_aphyllus
trnLF	Tristerix_aphyllus|DQ442917|L_Suarez_sn_BCRU	Unconspicuous	Tristerix_aphyllus		Tristerix_aphyllus|DQ442917|L_Suarez_sn_BCRU	Tristerix_aphyllus
trnLF	Tristerix_aphyllus|DQ442918|G_Amico_162_BCRU	Unconspicuous	Tristerix_aphyllus		Tristerix_aphyllus|DQ442918|G_Amico_162_BCRU	Tristerix_aphyllus
trnLF	Tristerix_aphyllus|DQ442919|G_Amico_166_BCRU	Unconspicuous	Tristerix_aphyllus		Tristerix_aphyllus|DQ442919|G_Amico_166_BCRU	Tristerix_aphyllus
trnLF	Tristerix_chodatianus|DQ442938|DN_Smith_Valencia_Gonzales_9536_3337838_MO	Unconspicuous	Tristerix_chodatianus		Tristerix_chodatianus|DQ442938|DN_Smith_Valencia_Gonzales_9536_3337838_MO	Tristerix_chodatianus
18S	Tristerix_corymbosus|EF464467|Nickrent_4129	Unconspicuous	Tristerix_corymbosus		Tristerix_corymbosus|EF464467|Nickrent_4129	Tristerix_corymbosus
matK	Tristerix_corymbosus|EF464512|Nickrent_4129	Unconspicuous	Tristerix_corymbosus		Tristerix_corymbosus|EF464512|Nickrent_4129	Tristerix_corymbosus
trnLF	Tristerix_corymbosus|DQ340605|Calvin_and_Wilson_CL03_02	Unconspicuous	Tristerix_corymbosus		Tristerix_corymbosus|DQ340605|Calvin_and_Wilson_CL03_02	Tristerix_corymbosus
trnLF	Tristerix_corymbosus|DQ442920|G_Amico_80_BCRU	Unconspicuous	Tristerix_corymbosus		Tristerix_corymbosus|DQ442920|G_Amico_80_BCRU	Tristerix_corymbosus
trnLF	Tristerix_corymbosus|DQ442921|G_Amico_83_BCRU	Unconspicuous	Tristerix_corymbosus		Tristerix_corymbosus|DQ442921|G_Amico_83_BCRU	Tristerix_corymbosus
trnLF	Tristerix_corymbosus|DQ442922|G_Amico_84_BCRU	Unconspicuous	Tristerix_corymbosus		Tristerix_corymbosus|DQ442922|G_Amico_84_BCRU	Tristerix_corymbosus
trnLF	Tristerix_corymbosus|DQ442923|G_Amico_96_BCRU	Unconspicuous	Tristerix_corymbosus		Tristerix_corymbosus|DQ442923|G_Amico_96_BCRU	Tristerix_corymbosus
trnLF	Tristerix_corymbosus|EF464493|Nickrent_4597A	Unconspicuous	Tristerix_corymbosus		Tristerix_corymbosus|EF464493|Nickrent_4597A	Tristerix_corymbosus
25S	Tristerix_corymbosus|EF464479|Nickrent_4572	Unconspicuous	Tristerix_corymbosus		Tristerix_corymbosus|EF464479|Nickrent_4572	Tristerix_corymbosus
trnLF	Tristerix_grandiflorus|DQ442930|Palacios_Neil_Ceron_2547_3672311_MO	Unconspicuous	Tristerix_grandiflorus		Tristerix_grandiflorus|DQ442930|Palacios_Neil_Ceron_2547_3672311_MO	Tristerix_grandiflorus
trnLF	Tristerix_grandiflorus|DQ442931|V_Zar_1368_3907304_MO	Unconspicuous	Tristerix_grandiflorus		Tristerix_grandiflorus|DQ442931|V_Zar_1368_3907304_MO	Tristerix_grandiflorus
trnLF	Tristerix_longebracteatus|DQ442932|DN_Smith_8288_722877_MO	Unconspicuous	Tristerix_longebracteatus		Tristerix_longebracteatus|DQ442932|DN_Smith_8288_722877_MO	Tristerix_longebracteatus
trnLF	Tristerix_longebracteatus|DQ442933|D_Fernandez_M_Cerna_P_Villacres_371_5889268_MO	Unconspicuous	Tristerix_longebracteatus		Tristerix_longebracteatus|DQ442933|D_Fernandez_M_Cerna_P_Villacres_371_5889268_MO	Tristerix_longebracteatus
trnLF	Tristerix_penduliflorus|DQ442928|M_Lewis_35236_4661844_MO	Unconspicuous	Tristerix_penduliflorus		Tristerix_penduliflorus|DQ442928|M_Lewis_35236_4661844_MO	Tristerix_penduliflorus
trnLF	Tristerix_penduliflorus|DQ442929|P_Nunez_8288_720879_MO	Unconspicuous	Tristerix_penduliflorus		Tristerix_penduliflorus|DQ442929|P_Nunez_8288_720879_MO	Tristerix_penduliflorus
trnLF	Tristerix_peruvianus|DQ442934|DN_Smith_M_Buddensiek_10858_3307944__MO	Unconspicuous	Tristerix_peruvianus		Tristerix_peruvianus|DQ442934|DN_Smith_M_Buddensiek_10858_3307944__MO	Tristerix_peruvianus
trnLF	Tristerix_peytonii|DQ442935|P_Nunez_J_Arque_8287_3632650_MO	Unconspicuous	Tristerix_peytonii		Tristerix_peytonii|DQ442935|P_Nunez_J_Arque_8287_3632650_MO	Tristerix_peytonii
trnLF	Tristerix_pubescens|DQ442936|DN_Smith_M_Buddensiek_11090_3303268_MO	Unconspicuous	Tristerix_pubescens		Tristerix_pubescens|DQ442936|DN_Smith_M_Buddensiek_11090_3303268_MO	Tristerix_pubescens
trnLF	Tristerix_pubescens|DQ442937|DN_Smith_11388_3337809_MO	Unconspicuous	Tristerix_pubescens		Tristerix_pubescens|DQ442937|DN_Smith_11388_3337809_MO	Tristerix_pubescens
trnLF	Tristerix_verticillatus|DQ442924|G_Amico_154_BCRU	Unconspicuous	Tristerix_verticillatus		Tristerix_verticillatus|DQ442924|G_Amico_154_BCRU	Tristerix_verticillatus
trnLF	Tristerix_verticillatus|DQ442925|G_Amico_157_BCRU	Unconspicuous	Tristerix_verticillatus		Tristerix_verticillatus|DQ442925|G_Amico_157_BCRU	Tristerix_verticillatus
trnLF	Tristerix_verticillatus|DQ442926|G_Amico_158_BCRU	Unconspicuous	Tristerix_verticillatus		Tristerix_verticillatus|DQ442926|G_Amico_158_BCRU	Tristerix_verticillatus
trnLF	Tristerix_verticillatus|DQ442927|G_Amico_155_BCRU	Unconspicuous	Tristerix_verticillatus		Tristerix_verticillatus|DQ442927|G_Amico_155_BCRU	Tristerix_verticillatus
18S	Tupeia_antarctica|L24425|UNKNOWN	Unconspicuous	Tupeia_antarctica		Tupeia_antarctica|L24425|UNKNOWN	Tupeia_antarctica
matK	Tupeia_antarctica|DQ790172|D_Nickrent_2742	Unconspicuous	Tupeia_antarctica		Tupeia_antarctica|DQ790172|D_Nickrent_2742	Tupeia_antarctica
trnLF	Tupeia_antarctica|DQ340601|Calvin_and_Wilson_NZ98_02	Unconspicuous	Tupeia_antarctica		Tupeia_antarctica|DQ340601|Calvin_and_Wilson_NZ98_02	Tupeia_antarctica
trnLF	Tupeia_antarctica|EF464494|Nickrent_2742	Unconspicuous	Tupeia_antarctica		Tupeia_antarctica|EF464494|Nickrent_2742	Tupeia_antarctica
25S	Tupeia_antarctica|DQ790208|D__Nickrent_2742	Unconspicuous	Tupeia_antarctica		Tupeia_antarctica|DQ790208|D__Nickrent_2742	Tupeia_antarctica
18S	Vanwykia_remota|EU544351|Nickrent_4331	Unconspicuous	Vanwykia_remota		Vanwykia_remota|EU544351|Nickrent_4331	Vanwykia_remota
matK	Vanwykia_remota|EU544463|Nickrent_4331	Unconspicuous	Vanwykia_remota		Vanwykia_remota|EU544463|Nickrent_4331	Vanwykia_remota
trnLF	Vanwykia_remota|EU544514|Nickrent_4331	Unconspicuous	Vanwykia_remota		Vanwykia_remota|EU544514|Nickrent_4331	Vanwykia_remota
25S	Vanwykia_remota|EU544407|Nickrent_4331	Unconspicuous	Vanwykia_remota		Vanwykia_remota|EU544407|Nickrent_4331	Vanwykia_remota

## Sheet: FullHarvest
Organism	Accession number	Specimen-voucher	Definition	Authors (first line)	Journal (first line)	Tribe	Subtribe	Genus	Molecule type	Source	Sequence length	Region	Product(s)/Remarks
Actinanthella menyharthii	EU544313	Nickrent 4375	Actinanthella menyharthii voucher Nickrent 4375 small subunit ribosomal RNA gene, partial sequence.	Vidal-Russell,R. and Nickrent,D.L.	Am. J. Bot. 95 (8), 1015-1029 (2008)	Lorantheae	Tapinanthinae	Actinanthella	genomic DNA	Nucleolus	1645	18S
Actinanthella menyharthii	EU544352	Nickrent 4375	Actinanthella menyharthii voucher Nickrent 4375 26S ribosomal RNA gene, partial sequence.	Vidal-Russell,R. and Nickrent,D.L.	Am. J. Bot. 95 (8), 1015-1029 (2008)	Lorantheae	Tapinanthinae	Actinanthella	genomic DNA	Nucleolus	1843	25S
Actinanthella menyharthii	EU544408	Nickrent 4375	Actinanthella menyharthii voucher Nickrent 4375 maturase K-like (matK) gene, partial sequence; chloroplast.	Vidal-Russell,R. and Nickrent,D.L.	Am. J. Bot. 95 (8), 1015-1029 (2008)	Lorantheae	Tapinanthinae	Actinanthella	genomic DNA	Chloroplast	1453	matK
Aetanthus nodosus	EU544314	Nickrent 4561	Aetanthus nodosus voucher Nickrent 4561 small subunit ribosomal RNA gene, partial sequence.	Vidal-Russell,R. and Nickrent,D.L.	Am. J. Bot. 95 (8), 1015-1029 (2008)	Psittacantheae	Psittacanthinae	Aetanthus	genomic DNA	Nucleolus	1138	18S
Aetanthus nodosus	EU544409	Nickrent 4561	Aetanthus nodosus voucher Nickrent 4561 maturase K-like (matK) gene, partial sequence; chloroplast.	Vidal-Russell,R. and Nickrent,D.L.	Am. J. Bot. 95 (8), 1015-1029 (2008)	Psittacantheae	Psittacanthinae	Aetanthus	genomic DNA	Chloroplast	1443	matK
Agelanthus sansibarensis	U59946	UNKNOWN	Agelanthus sansibaricus 18S ribosomal RNA gene, partial sequence.	Nickrent,D.L. and Duff,R.J.	(in) Moreno,M.T., Cubero,J.I., Berner,D., Joel,D., Musselman,L.J.	Lorantheae	Tapinanthinae	Agelanthus	genomic DNA	Nucleolus	1762	18S
Agelanthus sansibarensis	DQ333824	A. Robertson 7365	Agelanthus sansibarensis internal transcribed spacer 1, partial sequence; 5.8S ribosomal RNA gene, complete sequence; and internal transcribed spacer 2, partial sequence.	Wilson,C.A. and Calvin,C.L.	Am. J. Bot. 93 (5), 787-796 (2006)	Lorantheae	Tapinanthinae	Agelanthus	genomic DNA	Nucleolus	566	ITS1; 5.8S; ITS2
Agelanthus sansibarensis	DQ340573	A. Robertson 7365	Agelanthus sansibarensis tRNA-Leu (trnL) gene and trnL-trnF intergenic spacer, partial sequence; chloroplast.	Wilson,C.A. and Calvin,C.L.	Am. J. Bot. 93 (5), 787-796 (2006)	Lorantheae	Tapinanthinae	Agelanthus	genomic DNA	Chloroplast	339	trnL/LF
Agelanthus sansibarensis	EU544353	Nickrent 2987	Agelanthus sansibarensis voucher Nickrent 2987 26S ribosomal RNA gene, partial sequence.	Vidal-Russell,R. and Nickrent,D.L.	Am. J. Bot. 95 (8), 1015-1029 (2008)	Lorantheae	Tapinanthinae	Agelanthus	genomic DNA	Nucleolus	2107	25S
Agelanthus sansibarensis	EU544410	Nickrent 2987	Agelanthus sansibarensis voucher Nickrent 2987 maturase K (matK) gene, partial cds; chloroplast.	Vidal-Russell,R. and Nickrent,D.L.	Am. J. Bot. 95 (8), 1015-1029 (2008)	Lorantheae	Tapinanthinae	Agelanthus	genomic DNA	Chloroplast	1382	matK
Agelanthus sansibarensis	EU544464	Nickrent 2987	Agelanthus sansibarensis voucher Nickrent 2987 ribulose-1,5-bisphosphate carboxylase/oxygenase large subunit (rbcL) gene, partial cds; chloroplast.	Vidal-Russell,R. and Nickrent,D.L.	Unpublished	Lorantheae	Tapinanthinae	Agelanthus	genomic DNA	Chloroplast	1378	rbcL
Alepis flavida	L24139	UNKNOWN	Alepis flavida (Hook. f.) Tiegh. 18S ribosomal RNA gene, partial sequence.	Nickrent,D.L. and Duff,R.J.	(in) Moreno,M.T., Cubero,J.I., Berner,D., Joel,D., Musselman,L.J.	Elytrantheae	[n/a]	Alepis	genomic DNA	Nucleolus	1756	18S
Alepis flavida	DQ333847	Calvin and Wilson NZ98-04	Alepis flavida internal transcribed spacer 1, partial sequence; 5.8S ribosomal RNA gene, complete sequence; and internal transcribed spacer 2, partial sequence.	Wilson,C.A. and Calvin,C.L.	Am. J. Bot. 93 (5), 787-796 (2006)	Elytrantheae	[n/a]	Alepis	genomic DNA	Nucleolus	706	ITS1; 5.8S; ITS2
Alepis flavida	DQ340598	Calvin and Wilson NZ98-04	Alepis flavida tRNA-Leu (trnL) gene and trnL-trnF intergenic spacer, partial sequence; chloroplast.	Wilson,C.A. and Calvin,C.L.	Am. J. Bot. 93 (5), 787-796 (2006)	Elytrantheae	[n/a]	Alepis	genomic DNA	Chloroplast	648	trnL/LF
Alepis flavida	EF464474	Nickrent 2743	Alepis flavida 26S ribosomal RNA gene, partial sequence.	Vidal-Russell,R. and Nickrent,D.L.	Mol. Phylogenet. Evol. 47 (2), 523-537 (2008)	Elytrantheae	[n/a]	Alepis	genomic DNA	Nucleolus	887	25S
Alepis flavida	EF464481	Nickrent 2743	Alepis flavida tRNA-Leu (trnL) gene, partial sequence; trnL-trnF intergenic spacer, complete sequence; and tRNA-Phe (trnF) gene, partial sequence; chloroplast.	Vidal-Russell,R. and Nickrent,D.L.	Mol. Phylogenet. Evol. 47 (2), 523-537 (2008)	Elytrantheae	[n/a]	Alepis	genomic DNA	Chloroplast	650	trnL/LF
Alepis flavida	EF464508	Nickrent 2743	Alepis flavida maturase K (matK) gene, partial cds; chloroplast.	Vidal-Russell,R. and Nickrent,D.L.	Mol. Phylogenet. Evol. 47 (2), 523-537 (2008)	Elytrantheae	[n/a]	Alepis	genomic DNA	Chloroplast	1177	matK
Alepis flavida	KP263290	Nickrent 2743	Alepis flavida voucher Nickrent 2743 acetyl co-A carboxylase (accD) gene, partial cds; chloroplast.	Su,H.-J., Hu,J.-M., Anderson,F.E., Der,J. and Nickrent,D.L.	Taxon 64 (3), 491-506 (2015)	Elytrantheae	[n/a]	Alepis	genomic DNA	Chloroplast	1162	accD
Amyema beccarii	AY453106	SP15590	Amyema beccarii maturase (matR) gene, partial cds; mitochondrial.	Barkman,T.J., Lim,S.H., Salleh,K.M. and Nais,J.	Proc. Natl. Acad. Sci. U.S.A. 101 (3), 787-792 (2004)	Lorantheae	Amyeminae	Amyema	genomic DNA	Mitochondrion	1494	matR
Amyema beccarii	DQ110224	Rachman IS409, A	Amyema beccarii NADH dehydrogenase subunit 1 (NADH1) gene, partial sequence; mitochondrial.	Davis,C.C., Anderson,W.R. and Wurdack,K.J.	Proc. Biol. Sci. 272 (1578), 2237-2242 (2005)	Lorantheae	Amyeminae	Amyema	genomic DNA	Mitochondrion	1722	nad1
Amyema cambagei	DQ333833	Calvin and Wilson AU99-01	Amyema cambagei internal transcribed spacer 1, partial sequence; 5.8S ribosomal RNA gene, complete sequence; and internal transcribed spacer 2, partial sequence.	Wilson,C.A. and Calvin,C.L.	Am. J. Bot. 93 (5), 787-796 (2006)	Lorantheae	Amyeminae	Amyema	genomic DNA	Nucleolus	647	ITS1; 5.8S; ITS2
Amyema cambagei	DQ340582	Calvin and Wilson AU99-01	Amyema cambagei tRNA-Leu (trnL) gene and trnL-trnF intergenic spacer, partial sequence; chloroplast.	Wilson,C.A. and Calvin,C.L.	Am. J. Bot. 93 (5), 787-796 (2006)	Lorantheae	Amyeminae	Amyema	genomic DNA	Chloroplast	608	trnL/LF
Amyema cambagei	KM896045	129307937	Amyema cambagei voucher 129307937 ribulose-1,5-bisphosphate carboxylase/oxygenase large subunit (rbcL) gene, partial cds; chloroplast.	Shapcott,A., Forster,P.I., Guymer,G.P., McDonald,W.J., Faith,D.P.,	PLoS ONE 10 (3), E0122164 (2015)	Lorantheae	Amyeminae	Amyema	genomic DNA	Chloroplast	553	rbcL
Amyema congener	HM116953	UNKNOWN	Amyema congener internal transcribed spacer 1, 5.8S ribosomal RNA gene, and internal transcribed spacer 2, complete sequence.	Goldie,X., Gillman,L., Crisp,M. and Wright,S.	Proc. Biol. Sci. 277 (1694), 2645-2653 (2010)	Lorantheae	Amyeminae	Amyema	genomic DNA	Nucleolus	815	ITS1; 5.8S; ITS2
Amyema glabrum	AF039073	UNKNOWN	Amyema glabrum 18S ribosomal RNA gene, partial sequence.	Nickrent,D.L. and Duff,R.J.	(in) Moreno,M.T., Cubero,J.I., Berner,D., Joel,D., Musselman,L.J.	Lorantheae	Amyeminae	Amyema	genomic DNA	Nucleolus	1751	18S
Amyema glabrum	EU544354	Nickrent 2794	Amyema glabrum voucher Nickrent 2794 26S ribosomal RNA gene, partial sequence.	Vidal-Russell,R. and Nickrent,D.L.	Am. J. Bot. 95 (8), 1015-1029 (2008)	Lorantheae	Amyeminae	Amyema	genomic DNA	Nucleolus	2088	25S
Amyema glabrum	EU544411	Nickrent 2794	Amyema glabrum voucher Nickrent 2794 maturase K (matK) gene, partial cds; chloroplast.	Vidal-Russell,R. and Nickrent,D.L.	Am. J. Bot. 95 (8), 1015-1029 (2008)	Lorantheae	Amyeminae	Amyema	genomic DNA	Chloroplast	1336	matK
Amyema glabrum	EU544465	Nickrent 2794	Amyema glabrum voucher Nickrent 2794 ribulose-1,5-bisphosphate carboxylase/oxygenase large subunit (rbcL) gene, partial cds; chloroplast.	Vidal-Russell,R. and Nickrent,D.L.	Unpublished	Lorantheae	Amyeminae	Amyema	genomic DNA	Chloroplast	1133	rbcL
Amyema glabrum	EU544476	Nickrent 2794	Amyema glabrum voucher Nickrent 2794 tRNA-Leu (trnL) gene, partial sequence; trnL-trnF intergenic spacer, complete sequence; and tRNA-Phe (trnF) gene, partial sequence; chloroplast.	Vidal-Russell,R. and Nickrent,D.L.	Am. J. Bot. 95 (8), 1015-1029 (2008)	Lorantheae	Amyeminae	Amyema	genomic DNA	Chloroplast	530	trnL/LF
Amyema maidenii	HM116952	UNKNOWN	Amyema maidenii internal transcribed spacer 1, 5.8S ribosomal RNA gene, and internal transcribed spacer 2, complete sequence.	Goldie,X., Gillman,L., Crisp,M. and Wright,S.	Proc. Biol. Sci. 277 (1694), 2645-2653 (2010)	Lorantheae	Amyeminae	Amyema	genomic DNA	Nucleolus	806	ITS1; 5.8S; ITS2
Amyema quandang	KM895821	129308315	Amyema quandang voucher 129308315 ribulose-1,5-bisphosphate carboxylase/oxygenase large subunit (rbcL) gene, partial cds; chloroplast.	Shapcott,A., Forster,P.I., Guymer,G.P., McDonald,W.J., Faith,D.P.,	PLoS ONE 10 (3), E0122164 (2015)	Lorantheae	Amyeminae	Amyema	genomic DNA	chloroplast Amyema quandang	553
Amyema quaternifolium	DQ110143	Jensensen 1360 A	Amyema quaternifolia F1-ATPase alpha subunit-like (atp1) gene, partial sequence; mitochondrial.	Davis,C.C., Anderson,W.R. and Wurdack,K.J.	Proc. Biol. Sci. 272 (1578), 2237-2242 (2005)	Lorantheae	Amyeminae	Amyema	genomic DNA	Mitochondrion	1017	atp1
Amyema quaternifolium	DQ110225	Jensensen 1360, A	Amyema quaternifolia NADH dehydrogenase subunit 1 (NADH1) gene, partial sequence; mitochondrial.	Davis,C.C., Anderson,W.R. and Wurdack,K.J.	Proc. Biol. Sci. 272 (1578), 2237-2242 (2005)	Lorantheae	Amyeminae	Amyema	genomic DNA	Mitochondrion	1610	nad1
Amyema quaternifolium	DQ110298	Jensensen 1360 A	Amyema quaternifolium voucher Jensensen 1360 A maturase (matR) gene, partial cds; mitochondrial.	Davis,C.C., Anderson,W.R. and Wurdack,K.J.	Proc. Biol. Sci. 272 (1578), 2237-2242 (2005)	Lorantheae	Amyeminae	Amyema	genomic DNA	Mitochondrion	1775	matR
Amyema queenslandicum	DQ333834	Calvin and Wilson AU02-22	Amyema queenslandica internal transcribed spacer 1, partial sequence; 5.8S ribosomal RNA gene, complete sequence; and internal transcribed spacer 2, partial sequence.	Wilson,C.A. and Calvin,C.L.	Am. J. Bot. 93 (5), 787-796 (2006)	Lorantheae	Amyeminae	Amyema	genomic DNA	Nucleolus	553	ITS1; 5.8S; ITS2
Amyema queenslandicum	DQ340583	Calvin and Wilson AU02-22	Amyema queenslandica tRNA-Leu (trnL) gene and trnL-trnF intergenic spacer, partial sequence; chloroplast.	Wilson,C.A. and Calvin,C.L.	Am. J. Bot. 93 (5), 787-796 (2006)	Lorantheae	Amyeminae	Amyema	genomic DNA	Chloroplast	610	trnL/LF
Amyema queenslandicum	EU544315	Nickrent 2788	Amyema queenslandicum voucher Nickrent 2788 small subunit ribosomal RNA gene, partial sequence.	Vidal-Russell,R. and Nickrent,D.L.	Am. J. Bot. 95 (8), 1015-1029 (2008)	Lorantheae	Amyeminae	Amyema	genomic DNA	Nucleolus	1674	18S
Amyema queenslandicum	EU544355	Nickrent 2788	Amyema queenslandicum voucher Nickrent 2788 26S ribosomal RNA gene, partial sequence.	Vidal-Russell,R. and Nickrent,D.L.	Am. J. Bot. 95 (8), 1015-1029 (2008)	Lorantheae	Amyeminae	Amyema	genomic DNA	Nucleolus	1982	25S
Amyema queenslandicum	EU544412	Nickrent 2788	Amyema queenslandicum voucher Nickrent 2788 maturase K (matK) gene, partial cds; chloroplast.	Vidal-Russell,R. and Nickrent,D.L.	Am. J. Bot. 95 (8), 1015-1029 (2008)	Lorantheae	Amyeminae	Amyema	genomic DNA	Chloroplast	1341	matK
Amyema sp.	DQ110163	Takeuichi 4325 A	Amyema sp. Takeuichi 4325 ATPase subunit 6 (atp6) gene, partial cds; mitochondrial.	Davis,C.C., Anderson,W.R. and Wurdack,K.J.	Proc. Biol. Sci. 272 (1578), 2237-2242 (2005)	Lorantheae	Amyeminae	Amyema	genomic DNA	Mitochondrion	633	atp6
Amyema villiflora	KF496740	Costion 1601	Amyema villiflora subsp. tomentilla isolate C59 ribulose-1,5-bisphosphate carboxylase/oxygenase large subunit (rbcL) gene, partial cds; chloroplast.	Costion,C.M.	Unpublished	Lorantheae	Amyeminae	Amyema	genomic DNA	chloroplast Amyema villiflora subsp. tomentilla	566	rbcL
Amylotheca dictyophleba	KF496311	Costion 1674	Amylotheca dictyophleba isolate D40 ribulose-1,5-bisphosphate carboxylase/oxygenase large subunit (rbcL) gene, partial cds; chloroplast.	Costion,C.M.	Unpublished	Elytrantheae	[n/a]	Amylotheca	genomic DNA	chloroplast Amylotheca dictyophleba	566	rbcL
Amylotheca dictyophleba	KM895092	1076418209	Amylotheca dictyophleba voucher 1076418209 trnH-psbA intergenic spacer, partial sequence; chloroplast.	Shapcott,A., Forster,P.I., Guymer,G.P., McDonald,W.J., Faith,D.P.,	PLoS ONE 10 (3), E0122164 (2015)	Elytrantheae	[n/a]	Amylotheca	genomic DNA	chloroplast Amylotheca dictyophleba	240	trnH-psbA
Amylotheca dictyophleba	KM895635	1076418209	Amylotheca dictyophleba voucher 1076418209 ribulose-1,5-bisphosphate carboxylase/oxygenase large subunit (rbcL) gene, partial cds; chloroplast.	Shapcott,A., Forster,P.I., Guymer,G.P., McDonald,W.J., Faith,D.P.,	PLoS ONE 10 (3), E0122164 (2015)	Elytrantheae	[n/a]	Amylotheca	genomic DNA	chloroplast Amylotheca dictyophleba	513	rbcL
Amylotheca duthieana	EU544316	Nickrent 4022	Amylotheca duthieana voucher Nickrent 4022 small subunit ribosomal RNA gene, partial sequence.	Vidal-Russell,R. and Nickrent,D.L.	Am. J. Bot. 95 (8), 1015-1029 (2008)	Elytrantheae	[n/a]	Amylotheca	genomic DNA	Nucleolus	1038	18S
Amylotheca duthieana	EU544356	Nickrent 4022	Amylotheca duthieana voucher Nickrent 4022 26S ribosomal RNA gene, partial sequence.	Vidal-Russell,R. and Nickrent,D.L.	Am. J. Bot. 95 (8), 1015-1029 (2008)	Elytrantheae	[n/a]	Amylotheca	genomic DNA	Nucleolus	2106	25S
Amylotheca duthieana	EU544413	Nickrent 4022	Amylotheca duthieana voucher Nickrent 4022 maturase K (matK) gene, complete cds; chloroplast.	Vidal-Russell,R. and Nickrent,D.L.	Am. J. Bot. 95 (8), 1015-1029 (2008)	Elytrantheae	[n/a]	Amylotheca	genomic DNA	Chloroplast	1533	matK
Amylotheca duthieana	EU544477	Nickrent 4022	Amylotheca duthieana voucher Nickrent 4022 tRNA-Leu (trnL) gene, partial sequence; trnL-trnF intergenic spacer, complete sequence; and tRNA-Phe (trnF) gene, partial sequence; chloroplast.	Vidal-Russell,R. and Nickrent,D.L.	Am. J. Bot. 95 (8), 1015-1029 (2008)	Elytrantheae	[n/a]	Amylotheca	genomic DNA	Chloroplast	630	trnL/LF
Amylotheca subumbellata	DQ333849	Calvin and Wilson AU98-21	Amylotheca subumbellata internal transcribed spacer 1, partial sequence; 5.8S ribosomal RNA gene, complete sequence; and internal transcribed spacer 2, partial sequence.	Wilson,C.A. and Calvin,C.L.	Am. J. Bot. 93 (5), 787-796 (2006)	Elytrantheae	[n/a]	Amylotheca	genomic DNA	Nucleolus	673	ITS1; 5.8S; ITS2
Amylotheca subumbellata	DQ340600	Calvin and Wilson AU98-21	Amylotheca subumbellata tRNA-Leu (trnL) gene and trnL-trnF intergenic spacer, partial sequence; chloroplast.	Wilson,C.A. and Calvin,C.L.	Am. J. Bot. 93 (5), 787-796 (2006)	Elytrantheae	[n/a]	Amylotheca	genomic DNA	Chloroplast	596	trnL/LF
Atkinsonia ligustrina	DQ333865	Calvin and Wilson AU00-01	Atkinsonia ligustrina internal transcribed spacer 1, partial sequence; 5.8S ribosomal RNA gene, complete sequence; and internal transcribed spacer 2, partial sequence.	Wilson,C.A. and Calvin,C.L.	Am. J. Bot. 93 (5), 787-796 (2006)	Gaiadendreae	[n/a]	Atkinsonia	genomic DNA	Nucleolus	666	ITS1; 5.8S; ITS2
Atkinsonia ligustrina	DQ340616	Calvin and Wilson AU00-01	Atkinsonia ligustrina tRNA-Leu (trnL) gene and trnL-trnF intergenic spacer, partial sequence; chloroplast.	Wilson,C.A. and Calvin,C.L.	Am. J. Bot. 93 (5), 787-796 (2006)	Gaiadendreae	[n/a]	Atkinsonia	genomic DNA	Chloroplast	689	trnL/LF
Atkinsonia ligustrina	DQ787444	Nickrent 4343	Atkinsonia ligustrina maturase K (matK) gene, partial cds; chloroplast.	Vidal-Russell,R. and Nickrent,D.L.	Syst. Bot. 32 (3), 560-568 (2007)	Gaiadendreae	[n/a]	Atkinsonia	genomic DNA	Chloroplast	1338	matK
Atkinsonia ligustrina	DQ788714	Nickrent 4343	Atkinsonia ligustrina tRNA-Leu (trnL) gene, partial sequence; trnL-trnF intergenic spacer, complete sequence; and tRNA-Phe (trnF) gene, partial sequence; chloroplast.	Vidal-Russell,R. and Nickrent,D.L.	Syst. Bot. 32 (3), 560-568 (2007)	Gaiadendreae	[n/a]	Atkinsonia	genomic DNA	Chloroplast	647	trnL/LF
Atkinsonia ligustrina	EF464464	Nickrent 4344	Atkinsonia ligustrina 18S ribosomal RNA gene, partial sequence.	Vidal-Russell,R. and Nickrent,D.L.	Mol. Phylogenet. Evol. 47 (2), 523-537 (2008)	Gaiadendreae	[n/a]	Atkinsonia	genomic DNA	Nucleolus	1683	18S
Atkinsonia ligustrina	EF464475	Nickrent 4344	Atkinsonia ligustrina 26S ribosomal RNA gene, partial sequence.	Vidal-Russell,R. and Nickrent,D.L.	Mol. Phylogenet. Evol. 47 (2), 523-537 (2008)	Gaiadendreae	[n/a]	Atkinsonia	genomic DNA	Nucleolus	776	25S
Atkinsonia ligustrina	EF464526	Nickrent 4344	Atkinsonia ligustrina ribulose-1,5-bisphosphate carboxylase/oxygenase large subunit (rbcL) gene, partial cds; chloroplast.	Vidal-Russell,R. and Nickrent,D.L.	Mol. Phylogenet. Evol. 47 (2), 523-537 (2008)	Gaiadendreae	[n/a]	Atkinsonia	genomic DNA	Chloroplast	699	rbcL
Bakerella sp.	EU544318	Nickrent 4161	Bakerella sp. Nickrent 4161 small subunit ribosomal RNA gene, partial sequence.	Vidal-Russell,R. and Nickrent,D.L.	Am. J. Bot. 95 (8), 1015-1029 (2008)	Lorantheae	Tapinanthinae	Bakerella	genomic DNA	Nucleolus	1696	18S
Bakerella sp.	EU544358	Nickrent 4161	Bakerella sp. Nickrent 4161 26S ribosomal RNA gene, partial sequence.	Vidal-Russell,R. and Nickrent,D.L.	Am. J. Bot. 95 (8), 1015-1029 (2008)	Lorantheae	Tapinanthinae	Bakerella	genomic DNA	Nucleolus	2057	25S
Bakerella sp.	EU544415	Nickrent 4161	Bakerella sp. Nickrent 4161 maturase K (matK) gene, partial cds; chloroplast.	Vidal-Russell,R. and Nickrent,D.L.	Am. J. Bot. 95 (8), 1015-1029 (2008)	Lorantheae	Tapinanthinae	Bakerella	genomic DNA	Chloroplast	1450	matK
Bakerella sp.	EU544466	Nickrent 4161	Bakerella sp. Nickrent 4161 ribulose-1,5-bisphosphate carboxylase/oxygenase large subunit (rbcL) gene, partial cds; chloroplast.	Vidal-Russell,R. and Nickrent,D.L.	Unpublished	Lorantheae	Tapinanthinae	Bakerella	genomic DNA	Chloroplast	1389	rbcL
Bakerella sp.	EU544479	Nickrent 4161	Bakerella sp. Nickrent 4161 tRNA-Leu (trnL) gene, partial sequence; trnL-trnF intergenic spacer, complete sequence; and tRNA-Phe (trnF) gene, partial sequence; chloroplast.	Vidal-Russell,R. and Nickrent,D.L.	Am. J. Bot. 95 (8), 1015-1029 (2008)	Lorantheae	Tapinanthinae	Bakerella	genomic DNA	Chloroplast	592	trnL/LF
Baratranthus axanthus	DQ333838	Calvin and Wilson B02-14	Baratranthus axanthus internal transcribed spacer 1, partial sequence; 5.8S ribosomal RNA gene, complete sequence; and internal transcribed spacer 2, partial sequence.	Wilson,C.A. and Calvin,C.L.	Am. J. Bot. 93 (5), 787-796 (2006)	Lorantheae	Amyeminae	Baratranthus	genomic DNA	Nucleolus	617	ITS1; 5.8S; ITS2
Baratranthus axanthus	DQ340587	Calvin and Wilson B02-14	Baratranthus axanthus tRNA-Leu (trnL) gene and trnL-trnF intergenic spacer, partial sequence; chloroplast.	Wilson,C.A. and Calvin,C.L.	Am. J. Bot. 93 (5), 787-796 (2006)	Lorantheae	Amyeminae	Baratranthus	genomic DNA	Chloroplast	646	trnL/LF
Baratranthus axanthus	EU544317	Nickrent 4029	Barathranthus axanthus voucher Nickrent 4029 small subunit ribosomal RNA gene, partial sequence.	Vidal-Russell,R. and Nickrent,D.L.	Am. J. Bot. 95 (8), 1015-1029 (2008)	Lorantheae	Amyeminae	Baratranthus	genomic DNA	Nucleolus	1676	18S
Baratranthus axanthus	EU544357	Nickrent 4029	Barathranthus axanthus voucher Nickrent 4029 26S ribosomal RNA gene, partial sequence.	Vidal-Russell,R. and Nickrent,D.L.	Am. J. Bot. 95 (8), 1015-1029 (2008)	Lorantheae	Amyeminae	Baratranthus	genomic DNA	Nucleolus	2037	25S
Baratranthus axanthus	EU544414	Nickrent 4029	Barathranthus axanthus voucher Nickrent 4029 maturase K (matK) gene, partial cds; chloroplast.	Vidal-Russell,R. and Nickrent,D.L.	Am. J. Bot. 95 (8), 1015-1029 (2008)	Lorantheae	Amyeminae	Baratranthus	genomic DNA	Chloroplast	1312	matK
Baratranthus axanthus	EU544478	Nickrent 4029	Barathranthus axanthus voucher Nickrent 4029 tRNA-Leu (trnL) gene, partial sequence; trnL-trnF intergenic spacer, complete sequence; and tRNA-Phe (trnF) gene, partial sequence; chloroplast.	Vidal-Russell,R. and Nickrent,D.L.	Am. J. Bot. 95 (8), 1015-1029 (2008)	Lorantheae	Amyeminae	Baratranthus	genomic DNA	Chloroplast	615	trnL/LF
Benthamina alyxifolia	AY957440	Nickrent 4127	Benthamina alyxifolia ribulose-1,5-bisphosphate carboxylase/oxygenase large subunit (rbcL) gene, partial cds; chloroplast.	Nickrent,D.L., Der,J.P. and Anderson,F.E.	BMC Evol. Biol. 5, 38 (2005)	Lorantheae	Amyeminae	Benthamina	genomic DNA	Chloroplast	1395	rbcL
Benthamina alyxifolia	DQ333835	Calvin and Wilson AU99-14	Benthamina alyxifolia internal transcribed spacer 1, partial sequence; 5.8S ribosomal RNA gene, complete sequence; and internal transcribed spacer 2, partial sequence.	Wilson,C.A. and Calvin,C.L.	Am. J. Bot. 93 (5), 787-796 (2006)	Lorantheae	Amyeminae	Benthamina	genomic DNA	Nucleolus	643	ITS1; 5.8S; ITS2
Benthamina alyxifolia	DQ340584	Calvin and Wilson AU99-14	Benthamina alyxifolia tRNA-Leu (trnL) gene and trnL-trnF intergenic spacer, partial sequence; chloroplast.	Wilson,C.A. and Calvin,C.L.	Am. J. Bot. 93 (5), 787-796 (2006)	Lorantheae	Amyeminae	Benthamina	genomic DNA	Chloroplast	644	trnL/LF
Benthamina alyxifolia	EU544319	Nickrent 4127	Benthamina alyxifolia voucher Nickrent 4127 small subunit ribosomal RNA gene, partial sequence.	Vidal-Russell,R. and Nickrent,D.L.	Am. J. Bot. 95 (8), 1015-1029 (2008)	Lorantheae	Amyeminae	Benthamina	genomic DNA	Nucleolus	1769	18S
Benthamina alyxifolia	EU544359	Nickrent 4127	Benthamina alyxifolia voucher Nickrent 4127 26S ribosomal RNA gene, partial sequence.	Vidal-Russell,R. and Nickrent,D.L.	Am. J. Bot. 95 (8), 1015-1029 (2008)	Lorantheae	Amyeminae	Benthamina	genomic DNA	Nucleolus	2082	25S
Benthamina alyxifolia	EU544416	Nickrent 4127	Benthamina alyxifolia voucher Nickrent 4127 maturase K-like (matK) gene, partial sequence; chloroplast.	Vidal-Russell,R. and Nickrent,D.L.	Am. J. Bot. 95 (8), 1015-1029 (2008)	Lorantheae	Amyeminae	Benthamina	genomic DNA	Chloroplast	1432	matK
Benthamina alyxifolia	EU544480	Nickrent 4127	Benthamina alyxifolia voucher Nickrent 4127 tRNA-Leu (trnL) gene, partial sequence; trnL-trnF intergenic spacer, complete sequence; and tRNA-Phe (trnF) gene, partial sequence; chloroplast.	Vidal-Russell,R. and Nickrent,D.L.	Am. J. Bot. 95 (8), 1015-1029 (2008)	Lorantheae	Amyeminae	Benthamina	genomic DNA	Chloroplast	654	trnL/LF
Benthamina sp.	AB586377	UNKNOWN	Benthamina sp. SH-2010 chloroplast gene for ribulose-1,5-bisphosphate carboxylase/oxygenase large subunit, partial cds, isolate: A250.	Tobe,H., Shinohara,W., Utani,N., Wiriadinata,H., Girmansyah,D.,	Unpublished	Lorantheae	Amyeminae	Benthamina	genomic DNA	Chloroplast	1283	rbcL
Benthamina sp.	AB586378	UNKNOWN	Benthamina sp. SH-2010 chloroplast gene for ribulose-1,5-bisphosphate carboxylase/oxygenase large subunit, partial cds, isolate: A269.	Tobe,H., Shinohara,W., Utani,N., Wiriadinata,H., Girmansyah,D.,	Unpublished	Lorantheae	Amyeminae	Benthamina	genomic DNA	Chloroplast	1214	rbcL
Benthamina sp.	AB586379	UNKNOWN	Benthamina sp. SH-2010 chloroplast gene for ribulose-1,5-bisphosphate carboxylase/oxygenase large subunit, partial cds, isolate: A286.	Tobe,H., Shinohara,W., Utani,N., Wiriadinata,H., Girmansyah,D.,	Unpublished	Lorantheae	Amyeminae	Benthamina	genomic DNA	Chloroplast	1208	rbcL
Benthamina sp.	AB586380	UNKNOWN	Benthamina sp. SH-2010 chloroplast gene for ribulose-1,5-bisphosphate carboxylase/oxygenase large subunit, partial cds, isolate: T281.	Tobe,H., Shinohara,W., Utani,N., Wiriadinata,H., Girmansyah,D.,	Unpublished	Lorantheae	Amyeminae	Benthamina	genomic DNA	Chloroplast	1266	rbcL
Berhautia senegalensis	EU544320	Nickrent 4576	Berhautia senegalensis voucher Nickrent 4576 small subunit ribosomal RNA gene, partial sequence.	Vidal-Russell,R. and Nickrent,D.L.	Am. J. Bot. 95 (8), 1015-1029 (2008)	Lorantheae	Tapinanthinae	Berhautia	genomic DNA	Nucleolus	1780	18S
Berhautia senegalensis	EU544360	Nickrent 4576	Berhautia senegalensis voucher Nickrent 4576 26S ribosomal RNA gene, partial sequence.	Vidal-Russell,R. and Nickrent,D.L.	Am. J. Bot. 95 (8), 1015-1029 (2008)	Lorantheae	Tapinanthinae	Berhautia	genomic DNA	Nucleolus	2099	25S
Berhautia senegalensis	EU544417	Nickrent 4576	Berhautia senegalensis voucher Nickrent 4576 maturase K (matK) gene, partial cds; chloroplast.	Vidal-Russell,R. and Nickrent,D.L.	Am. J. Bot. 95 (8), 1015-1029 (2008)	Lorantheae	Tapinanthinae	Berhautia	genomic DNA	Chloroplast	1364	matK
Cecarria obtusifolia	DQ333836	Calvin and Wilson AU02-16	Cecarria obtusifolia internal transcribed spacer 1, partial sequence; 5.8S ribosomal RNA gene, complete sequence; and internal transcribed spacer 2, partial sequence.	Wilson,C.A. and Calvin,C.L.	Am. J. Bot. 93 (5), 787-796 (2006)	Lorantheae	Loranthinae	Cecarria	genomic DNA	Nucleolus	637	ITS1; 5.8S; ITS2
Cecarria obtusifolia	DQ340585	Calvin and Wilson AU02-16	Cecarria obtusifolia tRNA-Leu (trnL) gene and trnL-trnF intergenic spacer, partial sequence; chloroplast.	Wilson,C.A. and Calvin,C.L.	Am. J. Bot. 93 (5), 787-796 (2006)	Lorantheae	Loranthinae	Cecarria	genomic DNA	Chloroplast	528	trnL/LF
Cecarria obtusifolia	EU544321	Nickrent 4562	Cecarria obtusifolia voucher Nickrent 4562 small subunit ribosomal RNA gene, partial sequence.	Vidal-Russell,R. and Nickrent,D.L.	Am. J. Bot. 95 (8), 1015-1029 (2008)	Lorantheae	Loranthinae	Cecarria	genomic DNA	Nucleolus	1778	18S
Cecarria obtusifolia	EU544361	Nickrent 4562	Cecarria obtusifolia voucher Nickrent 4562 26S ribosomal RNA gene, partial sequence.	Vidal-Russell,R. and Nickrent,D.L.	Am. J. Bot. 95 (8), 1015-1029 (2008)	Lorantheae	Loranthinae	Cecarria	genomic DNA	Nucleolus	1806	25S
Cecarria obtusifolia	EU544418	Nickrent 4562	Cecarria obtusifolia voucher Nickrent 4562 maturase K-like (matK) gene, partial sequence; chloroplast.	Vidal-Russell,R. and Nickrent,D.L.	Am. J. Bot. 95 (8), 1015-1029 (2008)	Lorantheae	Loranthinae	Cecarria	genomic DNA	Chloroplast	612	matK
Cecarria obtusifolia	EU544467	Nickrent 4562	Cecarria obtusifolia voucher Nickrent 4562 ribulose-1,5-bisphosphate carboxylase/oxygenase large subunit (rbcL) gene, partial cds; chloroplast.	Vidal-Russell,R. and Nickrent,D.L.	Unpublished	Lorantheae	Loranthinae	Cecarria	genomic DNA	Chloroplast	676	rbcL
Cecarria obtusifolia	EU544481	Nickrent 4562	Cecarria obtusifolia voucher Nickrent 4562 tRNA-Leu (trnL) gene, partial sequence; trnL-trnF intergenic spacer, complete sequence; and tRNA-Phe (trnF) gene, partial sequence; chloroplast.	Vidal-Russell,R. and Nickrent,D.L.	Am. J. Bot. 95 (8), 1015-1029 (2008)	Lorantheae	Loranthinae	Cecarria	genomic DNA	Chloroplast	479	trnL/LF
Cladocolea cupulata	DQ333861	Calvin and Wilson MX03-08	Cladocolea cupulata internal transcribed spacer 1, partial sequence; 5.8S ribosomal RNA gene, complete sequence; and internal transcribed spacer 2, partial sequence.	Wilson,C.A. and Calvin,C.L.	Am. J. Bot. 93 (5), 787-796 (2006)	Psittacantheae	Psittacanthinae	Cladocolea	genomic DNA	Nucleolus	665	ITS1; 5.8S; ITS2
Cladocolea cupulata	DQ340612	Calvin and Wilson MX03-08	Cladocolea cupulata tRNA-Leu (trnL) gene and trnL-trnF intergenic spacer, partial sequence; chloroplast.	Wilson,C.A. and Calvin,C.L.	Am. J. Bot. 93 (5), 787-796 (2006)	Psittacantheae	Psittacanthinae	Cladocolea	genomic DNA	Chloroplast	696	trnL/LF
Cladocolea gracilis	EU544322	Nickrent 3066	Cladocolea gracilis voucher Nickrent 3066 small subunit ribosomal RNA gene, partial sequence.	Vidal-Russell,R. and Nickrent,D.L.	Am. J. Bot. 95 (8), 1015-1029 (2008)	Psittacantheae	Psittacanthinae	Cladocolea	genomic DNA	Nucleolus	1665	18S
Cladocolea gracilis	EU544362	Nickrent 3066	Cladocolea gracilis voucher Nickrent 3066 26S ribosomal RNA gene, partial sequence.	Vidal-Russell,R. and Nickrent,D.L.	Am. J. Bot. 95 (8), 1015-1029 (2008)	Psittacantheae	Psittacanthinae	Cladocolea	genomic DNA	Nucleolus	1831	25S
Cladocolea gracilis	EU544419	Nickrent 3066	Cladocolea gracilis voucher Nickrent 3066 maturase K (matK) gene, partial cds; chloroplast.	Vidal-Russell,R. and Nickrent,D.L.	Am. J. Bot. 95 (8), 1015-1029 (2008)	Psittacantheae	Psittacanthinae	Cladocolea	genomic DNA	Chloroplast	1319	matK
Cladocolea gracilis	EU544482	Nickrent 3066	Cladocolea gracilis voucher Nickrent 3066 tRNA-Leu (trnL) gene, partial sequence; trnL-trnF intergenic spacer, complete sequence; and tRNA-Phe (trnF) gene, partial sequence; chloroplast.	Vidal-Russell,R. and Nickrent,D.L.	Am. J. Bot. 95 (8), 1015-1029 (2008)	Psittacantheae	Psittacanthinae	Cladocolea	genomic DNA	Chloroplast	634	trnL/LF
Cladocolea mcvaughii	DQ333860	Calvin and Wilson MX03-09	Cladocolea mcvaughii internal transcribed spacer 1, partial sequence; 5.8S ribosomal RNA gene, complete sequence; and internal transcribed spacer 2, partial sequence.	Wilson,C.A. and Calvin,C.L.	Am. J. Bot. 93 (5), 787-796 (2006)	Psittacantheae	Psittacanthinae	Cladocolea	genomic DNA	Nucleolus	665	ITS1; 5.8S; ITS2
Cladocolea mcvaughii	DQ340611	Calvin and Wilson MX03-09	Cladocolea mcvaughii tRNA-Leu (trnL) gene and trnL-trnF intergenic spacer, partial sequence; chloroplast.	Wilson,C.A. and Calvin,C.L.	Am. J. Bot. 93 (5), 787-796 (2006)	Psittacantheae	Psittacanthinae	Cladocolea	genomic DNA	Chloroplast	645	trnL/LF
Dactyliophora novae-guineae	DQ333837	Calvin and Wilson AU02-10	Dactyliophora novae-guineae internal transcribed spacer 1, partial sequence; 5.8S ribosomal RNA gene, complete sequence; and internal transcribed spacer 2, partial sequence.	Wilson,C.A. and Calvin,C.L.	Am. J. Bot. 93 (5), 787-796 (2006)	Lorantheae	Amyeminae	Dactyliophora	genomic DNA	Nucleolus	589	ITS1; 5.8S; ITS2
Dactyliophora novae-guineae	DQ340586	Calvin and Wilson AU02-10	Dactyliophora novae-guineae tRNA-Leu (trnL) gene and trnL-trnF intergenic spacer, partial sequence; chloroplast.	Wilson,C.A. and Calvin,C.L.	Am. J. Bot. 93 (5), 787-796 (2006)	Lorantheae	Amyeminae	Dactyliophora	genomic DNA	Chloroplast	633	trnL/LF
Dactyliophora novae-guineae	EU544323	Nickrent 4563	Dactyliophora novae-guineae voucher Nickrent 4563 small subunit ribosomal RNA gene, partial sequence.	Vidal-Russell,R. and Nickrent,D.L.	Am. J. Bot. 95 (8), 1015-1029 (2008)	Lorantheae	Amyeminae	Dactyliophora	genomic DNA	Nucleolus	1232	18S
Dactyliophora novae-guineae	EU544363	Nickrent 4563	Dactyliophora novae-guineae voucher Nickrent 4563 26S ribosomal RNA gene, partial sequence.	Vidal-Russell,R. and Nickrent,D.L.	Am. J. Bot. 95 (8), 1015-1029 (2008)	Lorantheae	Amyeminae	Dactyliophora	genomic DNA	Nucleolus	1735	25S
Dactyliophora novae-guineae	EU544420	Nickrent 4563	Dactyliophora novae-guineae voucher Nickrent 4563 maturase K-like (matK) gene, partial sequence; chloroplast.	Vidal-Russell,R. and Nickrent,D.L.	Am. J. Bot. 95 (8), 1015-1029 (2008)	Lorantheae	Amyeminae	Dactyliophora	genomic DNA	Chloroplast	1431	matK
Dactyliophora novae-guineae	EU544483	Nickrent 4563	Dactyliophora novae-guineae voucher Nickrent 4563 tRNA-Leu (trnL) gene, partial sequence; trnL-trnF intergenic spacer, complete sequence; and tRNA-Phe (trnF) gene, partial sequence; chloroplast.	Vidal-Russell,R. and Nickrent,D.L.	Am. J. Bot. 95 (8), 1015-1029 (2008)	Lorantheae	Amyeminae	Dactyliophora	genomic DNA	Chloroplast	592	trnL/LF
Decaisnina brittenii	DQ333844	Calvin and Wilson AU01-11	Decaisnina brittenii internal transcribed spacer 1, partial sequence; 5.8S ribosomal RNA gene, complete sequence; and internal transcribed spacer 2, partial sequence.	Wilson,C.A. and Calvin,C.L.	Am. J. Bot. 93 (5), 787-796 (2006)	Elytrantheae	[n/a]	Decaisnina	genomic DNA	Nucleolus	850	ITS1; 5.8S; ITS2
Decaisnina brittenii	DQ340595	Calvin and Wilson AU01-11	Decaisnina brittenii tRNA-Leu (trnL) gene and trnL-trnF intergenic spacer, partial sequence; chloroplast.	Wilson,C.A. and Calvin,C.L.	Am. J. Bot. 93 (5), 787-796 (2006)	Elytrantheae	[n/a]	Decaisnina	genomic DNA	Chloroplast	659	trnL/LF
Decaisnina congesta	DQ333843	Calvin and Wilson AU02-01	Decaisnina congesta internal transcribed spacer 1, partial sequence; 5.8S ribosomal RNA gene, complete sequence; and internal transcribed spacer 2, partial sequence.	Wilson,C.A. and Calvin,C.L.	Am. J. Bot. 93 (5), 787-796 (2006)	Elytrantheae	[n/a]	Decaisnina	genomic DNA	Nucleolus	749	ITS1; 5.8S; ITS2
Decaisnina congesta	DQ340594	Calvin and Wilson AU02-01	Decaisnina congesta tRNA-Leu (trnL) gene and trnL-trnF intergenic spacer, partial sequence; chloroplast.	Wilson,C.A. and Calvin,C.L.	Am. J. Bot. 93 (5), 787-796 (2006)	Elytrantheae	[n/a]	Decaisnina	genomic DNA	Chloroplast	651	trnL/LF
Decaisnina hollrungii	AF039074	UNKNOWN	Decaisnina hollrungii 18S ribosomal RNA gene, partial sequence.	Nickrent,D.L. and Duff,R.J.	(in) Moreno,M.T., Cubero,J.I., Berner,D., Joel,D., Musselman,L.J.	Elytrantheae	[n/a]	Decaisnina	genomic DNA	Nucleolus	1769	18S
Decaisnina signata	DQ333845	Calvin and Wilson AU02-05	Decaisnina signata internal transcribed spacer 1, partial sequence; 5.8S ribosomal RNA gene, complete sequence; and internal transcribed spacer 2, partial sequence.	Wilson,C.A. and Calvin,C.L.	Am. J. Bot. 93 (5), 787-796 (2006)	Elytrantheae	[n/a]	Decaisnina	genomic DNA	Nucleolus	745	ITS1; 5.8S; ITS2
Decaisnina signata	DQ340596	Calvin and Wilson AU02-05	Decaisnina signata tRNA-Leu (trnL) gene and trnL-trnF intergenic spacer, partial sequence; chloroplast.	Wilson,C.A. and Calvin,C.L.	Am. J. Bot. 93 (5), 787-796 (2006)	Elytrantheae	[n/a]	Decaisnina	genomic DNA	Chloroplast	610	trnL/LF
Decaisnina triflora	EU544324	Nickrent 4491	Decaisnina triflora voucher Nickrent 4491 small subunit ribosomal RNA gene, partial sequence.	Vidal-Russell,R. and Nickrent,D.L.	Am. J. Bot. 95 (8), 1015-1029 (2008)	Elytrantheae	[n/a]	Decaisnina	genomic DNA	Nucleolus	1575	18S
Decaisnina triflora	EU544364	Nickrent 4491	Decaisnina triflora voucher Nickrent 4491 26S ribosomal RNA gene, partial sequence.	Vidal-Russell,R. and Nickrent,D.L.	Am. J. Bot. 95 (8), 1015-1029 (2008)	Elytrantheae	[n/a]	Decaisnina	genomic DNA	Nucleolus	2046	25S
Decaisnina triflora	EU544421	Nickrent 4491	Decaisnina triflora voucher Nickrent 4491 maturase K (matK) gene, partial cds; chloroplast.	Vidal-Russell,R. and Nickrent,D.L.	Am. J. Bot. 95 (8), 1015-1029 (2008)	Elytrantheae	[n/a]	Decaisnina	genomic DNA	Chloroplast	1291	matK
Decaisnina triflora	EU544468	Nickrent 4491	Decaisnina triflora voucher Nickrent 4491 ribulose-1,5-bisphosphate carboxylase/oxygenase large subunit (rbcL) gene, partial cds; chloroplast.	Vidal-Russell,R. and Nickrent,D.L.	Unpublished	Elytrantheae	[n/a]	Decaisnina	genomic DNA	Chloroplast	830	rbcL
Decaisnina triflora	EU544484	Nickrent 4491	Decaisnina triflora voucher Nickrent 4491 tRNA-Leu (trnL) gene, partial sequence; trnL-trnF intergenic spacer, complete sequence; and tRNA-Phe (trnF) gene, partial sequence; chloroplast.	Vidal-Russell,R. and Nickrent,D.L.	Am. J. Bot. 95 (8), 1015-1029 (2008)	Elytrantheae	[n/a]	Decaisnina	genomic DNA	Chloroplast	583	trnL/LF
Dendropemon bicolor	AF039075	UNKNOWN	Dendropemon bicolor 18S ribosomal RNA gene, partial sequence.	Nickrent,D.L. and Duff,R.J.	(in) Moreno,M.T., Cubero,J.I., Berner,D., Joel,D., Musselman,L.J.	Psittacantheae	Psittacanthinae	Dendropemon	genomic DNA	Nucleolus	1755	18S
Dendropemon bicolor	EU544365	Nickrent 2172	Dendropemon bicolor voucher Nickrent 2172 26S ribosomal RNA gene, partial sequence.	Vidal-Russell,R. and Nickrent,D.L.	Am. J. Bot. 95 (8), 1015-1029 (2008)	Psittacantheae	Psittacanthinae	Dendropemon	genomic DNA	Nucleolus	1795	25S
Dendropemon bicolor	EU544422	Nickrent 2172	Dendropemon bicolor voucher Nickrent 2172 maturase K (matK) gene, partial cds; chloroplast.	Vidal-Russell,R. and Nickrent,D.L.	Am. J. Bot. 95 (8), 1015-1029 (2008)	Psittacantheae	Psittacanthinae	Dendropemon	genomic DNA	Chloroplast	1356	matK
Dendropemon bicolor	EU544469	Nickrent 2700	Dendropemon bicolor voucher Nickrent 2700 ribulose-1,5-bisphosphate carboxylase/oxygenase large subunit (rbcL) gene, partial cds; chloroplast.	Vidal-Russell,R. and Nickrent,D.L.	Unpublished	Psittacantheae	Psittacanthinae	Dendropemon	genomic DNA	Chloroplast	1134	rbcL
Dendropemon caribaeus	KP263296	Caraballo 1768	Dendropemon caribaeus voucher Caraballo 1768 acetyl co-A carboxylase (accD) mRNA, partial cds; chloroplast.	Su,H.-J., Hu,J.-M., Anderson,F.E., Der,J. and Nickrent,D.L.	Taxon 64 (3), 491-506 (2015)		Psittacanthinae	Dendropemon	mRNA	Chloroplast	602	[mRNA]	acetyl co-A carboxylase
Dendropemon caribaeus	KP263332	M. Caraballo s.n.	Dendropemon caribaeus voucher M. Caraballo s.n. RNA polymerase II second largest subunit (RPB2) mRNA, partial cds.	Su,H.-J., Hu,J.-M., Anderson,F.E., Der,J. and Nickrent,D.L.	Taxon 64 (3), 491-506 (2015)		Psittacanthinae	Dendropemon	mRNA	Nucleolus	1686	[mRNA]	RNA polymerase II second largest subunit
Dendrophthoe constricta	DQ333840	Calvin and Wilson B02-03	Dendrophthoe constricta internal transcribed spacer 1, partial sequence; 5.8S ribosomal RNA gene, complete sequence; and internal transcribed spacer 2, partial sequence.	Wilson,C.A. and Calvin,C.L.	Am. J. Bot. 93 (5), 787-796 (2006)	Lorantheae	Dendrophthoinae	Dendrophthoe	genomic DNA	Nucleolus	638	ITS1; 5.8S; ITS2
Dendrophthoe constricta	DQ340589	Calvin and Wilson B02-03	Dendrophthoe constricta tRNA-Leu (trnL) gene and trnL-trnF intergenic spacer, partial sequence; chloroplast.	Wilson,C.A. and Calvin,C.L.	Am. J. Bot. 93 (5), 787-796 (2006)	Lorantheae	Dendrophthoinae	Dendrophthoe	genomic DNA	Chloroplast	580	trnL/LF
Dendrophthoe curvata	L26491	UNKNOWN	Dendrophthoe curvata 18S ribosomal RNA gene, partial sequence.	Nickrent,D.L.	Unpublished	Lorantheae	Dendrophthoinae	Dendrophthoe	genomic DNA	Nucleolus	1737	18S
Dendrophthoe curvata	AY957441	Nickrent 2787	Dendrophthoe curvata 18S ribosomal RNA gene, partial sequence.	Nickrent,D.L., Der,J.P. and Anderson,F.E.	BMC Evol. Biol. 5, 38 (2005)	Lorantheae	Dendrophthoinae	Dendrophthoe	genomic DNA	Nucleolus	1739	18S
Dendrophthoe curvata	EU544325	Nickrent 4012	Dendrophthoe curvata voucher Nickrent 4012 small subunit ribosomal RNA gene, partial sequence.	Vidal-Russell,R. and Nickrent,D.L.	Am. J. Bot. 95 (8), 1015-1029 (2008)	Lorantheae	Dendrophthoinae	Dendrophthoe	genomic DNA	Nucleolus	1729	18S
Dendrophthoe curvata	EU544367	Nickrent 4012	Dendrophthoe curvata voucher Nickrent 4012 26S ribosomal RNA gene, partial sequence.	Vidal-Russell,R. and Nickrent,D.L.	Am. J. Bot. 95 (8), 1015-1029 (2008)	Lorantheae	Dendrophthoinae	Dendrophthoe	genomic DNA	Nucleolus	1023	25S
Dendrophthoe curvata	EU544424	Nickrent 4012	Dendrophthoe curvata voucher Nickrent 4012 maturase K (matK) gene, partial cds; chloroplast.	Vidal-Russell,R. and Nickrent,D.L.	Am. J. Bot. 95 (8), 1015-1029 (2008)	Lorantheae	Dendrophthoinae	Dendrophthoe	genomic DNA	Chloroplast	1329	matK
Dendrophthoe lanosa	JN687571	A. Chveerach_P38.1	Dendrophthoe lanosa psbA-trnH intergenic spacer, partial sequence; chloroplast.	Kwanda,N., Noikotr,K., Sudmoon,R., Tanee,T. and Chaveerach,A.	J Nat Med (2012) In press	Lorantheae	Dendrophthoinae	Dendrophthoe	genomic DNA	Chloroplast	300	trnH-psbA
Dendrophthoe lanosa	JN687563	A. Chveerach_P38.1	Dendrophthoe lanosa ribulose-1,5-bisphosphate carboxylase/oxygenase large subunit (rbcL) gene, partial cds; chloroplast.	Kwanda,N., Noikotr,K., Sudmoon,R., Tanee,T. and Chaveerach,A.	J Nat Med (2012) In press	Lorantheae	Dendrophthoinae	Dendrophthoe	genomic DNA	Chloroplast	519	rbcL
Dendrophthoe longituba	EU544366	Nickrent 4010	Dendrophthoe longituba voucher Nickrent 4010 26S ribosomal RNA gene, partial sequence.	Vidal-Russell,R. and Nickrent,D.L.	Am. J. Bot. 95 (8), 1015-1029 (2008)	Lorantheae	Dendrophthoinae	Dendrophthoe	genomic DNA	Nucleolus	2037	25S
Dendrophthoe longituba	EU544423	Nickrent 4010	Dendrophthoe longituba voucher Nickrent 4010 maturase K-like (matK) gene, partial sequence; chloroplast.	Vidal-Russell,R. and Nickrent,D.L.	Am. J. Bot. 95 (8), 1015-1029 (2008)	Lorantheae	Dendrophthoinae	Dendrophthoe	genomic DNA	Chloroplast	1452	matK
Dendrophthoe longituba	EU544485	Nickrent 4010	Dendrophthoe longituba voucher Nickrent 4010 tRNA-Leu (trnL) gene, partial sequence; trnL-trnF intergenic spacer, complete sequence; and tRNA-Phe (trnF) gene, partial sequence; chloroplast.	Vidal-Russell,R. and Nickrent,D.L.	Am. J. Bot. 95 (8), 1015-1029 (2008)	Lorantheae	Dendrophthoinae	Dendrophthoe	genomic DNA	Chloroplast	586	trnL/LF
Dendrophthoe nilgherrensis	JQ933297	Chase, 17409, (K)	Dendrophthoe nilgherrensis voucher Chase, 17409, (K) ribulose-1,5-bisphosphate carboxylase/oxygenase large subunit (rbcL) gene, partial cds; plastid.	Saslis-Lagoudakis,C.H., Savolainen,V., Williamson,E.M., Forest,F.,	Proc. Natl. Acad. Sci. U.S.A. 109 (39), 15835-15840 (2012)	Lorantheae	Dendrophthoinae	Dendrophthoe	genomic DNA	Chloroplast	665	rbcL
Dendrophthoe pentandra	AY191132	UNKNOWN	Dendrophthoe pentandra tRNA-Leu (trnL) gene, partial sequence; chloroplast gene for chloroplast product.	Han,R.L., Hao,G. and Zhang,D.X.	Unpublished	Lorantheae	Dendrophthoinae	Dendrophthoe	genomic DNA	Chloroplast	301	trnL/LF
Dendrophthoe pentandra	AY453120	SP15593	Dendrophthoe pentandra maturase (matR) gene, partial cds; mitochondrial.	Barkman,T.J., Lim,S.H., Salleh,K.M. and Nais,J.	Proc. Natl. Acad. Sci. U.S.A. 101 (3), 787-792 (2004)	Lorantheae	Dendrophthoinae	Dendrophthoe	genomic DNA	Mitochondrion	1470	matR
Dendrophthoe pentandra	EU281073	SNP15593 (SNP)	Dendrophthoe pentandra cytochrome oxidase subunit I (coxI) gene, partial cds; mitochondrial.	Barkman,T.J., McNeal,J.R., Lim,S.H., Coat,G., Croom,H.B.,	BMC Evol. Biol. 7, 248 (2007)	Lorantheae	Dendrophthoinae	Dendrophthoe	genomic DNA	Mitochondrion	2385	cox1
Dendrophthoe pentandra	EU280999	SNP15593 (SNP)	Dendrophthoe pentandra atp1 (atp1) gene, partial cds; mitochondrial.	Barkman,T.J., McNeal,J.R., Lim,S.H., Coat,G., Croom,H.B.,	BMC Evol. Biol. 7, 248 (2007)	Lorantheae	Dendrophthoinae	Dendrophthoe	genomic DNA	Mitochondrion	1195	atp1
Dendrophthoe pentandra	DQ110176	Barretto & Hu 23956 A	Dendrophthoe pentandra ATPase subunit 6 (atp6) gene, partial cds; mitochondrial.	Davis,C.C., Anderson,W.R. and Wurdack,K.J.	Proc. Biol. Sci. 272 (1578), 2237-2242 (2005)	Lorantheae	Dendrophthoinae	Dendrophthoe	genomic DNA	Mitochondrion	647	atp6
Dendrophthoe pentandra	DQ110268	Barretto & Hu 23956, A	Dendrophthoe pentandra NADH dehydrogenase subunit 1 (NADH1) gene, partial sequence; mitochondrial.	Davis,C.C., Anderson,W.R. and Wurdack,K.J.	Proc. Biol. Sci. 272 (1578), 2237-2242 (2005)	Lorantheae	Dendrophthoinae	Dendrophthoe	genomic DNA	Mitochondrion	1573	nad1
Dendrophthoe pentandra	DQ110337	Barretto & Hu 23956 A	Dendrophthoe pentandra voucher Barretto & Hu 23956 A maturase (matR) gene, partial cds; mitochondrial.	Davis,C.C., Anderson,W.R. and Wurdack,K.J.	Proc. Biol. Sci. 272 (1578), 2237-2242 (2005)	Lorantheae	Dendrophthoinae	Dendrophthoe	genomic DNA	Mitochondrion	1750	matR
Dendrophthoe pentandra	HQ317759	LS27	Dendrophthoe pentandra voucher LS27 ribulose-1,5-bisphosphate carboxylase/oxygenase large subunit (rbcL) gene, partial cds; chloroplast.	Li,Y.-H., Chen,S.-L., Yao,H. and Luo,K.	Unpublished	Lorantheae	Dendrophthoinae	Dendrophthoe	genomic DNA	Chloroplast	703	rbcL
Dendrophthoe pentandra	HQ317760	LS32	Dendrophthoe pentandra voucher LS32 ribulose-1,5-bisphosphate carboxylase/oxygenase large subunit (rbcL) gene, partial cds; chloroplast.	Li,Y.-H., Chen,S.-L., Yao,H. and Luo,K.	Unpublished	Lorantheae	Dendrophthoinae	Dendrophthoe	genomic DNA	Chloroplast	703	rbcL
Dendrophthoe pentandra	HQ317800	LS27	Dendrophthoe pentandra voucher LS27 PsbA (psbA) gene, partial cds; psbA-trnH intergenic spacer, complete sequence; and tRNA-His (trnH) gene, partial sequence; chloroplast.	Li,Y.-H., Chen,S.-L., Yao,H. and Luo,K.	Unpublished	Lorantheae	Dendrophthoinae	Dendrophthoe	genomic DNA	Chloroplast	309	trnH-psbA
Dendrophthoe pentandra	HQ317801	LS32	Dendrophthoe pentandra voucher LS32 PsbA (psbA) gene, partial cds; psbA-trnH intergenic spacer, complete sequence; and tRNA-His (trnH) gene, partial sequence; chloroplast.	Li,Y.-H., Chen,S.-L., Yao,H. and Luo,K.	Unpublished	Lorantheae	Dendrophthoinae	Dendrophthoe	genomic DNA	Chloroplast	316	trnH-psbA
Dendrophthoe pentandra	JN687572	A. Chveerach_P51.2	Dendrophthoe pentandra psbA-trnH intergenic spacer, partial sequence; chloroplast.	Kwanda,N., Noikotr,K., Sudmoon,R., Tanee,T. and Chaveerach,A.	J Nat Med (2012) In press	Lorantheae	Dendrophthoinae	Dendrophthoe	genomic DNA	Chloroplast	275	trnH-psbA
Dendrophthoe pentandra	JN687564	A. Chveerach_P51.2	Dendrophthoe pentandra ribulose-1,5-bisphosphate carboxylase/oxygenase large subunit (rbcL) gene, partial cds; chloroplast.	Kwanda,N., Noikotr,K., Sudmoon,R., Tanee,T. and Chaveerach,A.	J Nat Med (2012) In press	Lorantheae	Dendrophthoinae	Dendrophthoe	genomic DNA	Chloroplast	519	rbcL
Dendrophthoe vitellina	DQ333839	Calvin and Wilson AU98-08	Dendrophthoe vitellina internal transcribed spacer 1, partial sequence; 5.8S ribosomal RNA gene, complete sequence; and internal transcribed spacer 2, partial sequence.	Wilson,C.A. and Calvin,C.L.	Am. J. Bot. 93 (5), 787-796 (2006)	Lorantheae	Dendrophthoinae	Dendrophthoe	genomic DNA	Nucleolus	584	ITS1; 5.8S; ITS2
Dendrophthoe vitellina	DQ340588	Calvin and Wilson AU98-08	Dendrophthoe vitellina tRNA-Leu (trnL) gene and trnL-trnF intergenic spacer, partial sequence; chloroplast.	Wilson,C.A. and Calvin,C.L.	Am. J. Bot. 93 (5), 787-796 (2006)	Lorantheae	Dendrophthoinae	Dendrophthoe	genomic DNA	Chloroplast	584	trnL/LF
Dendrophthoe vitellina	KF496466	Costion 1437	Dendrophthoe vitellina isolate B12 ribulose-1,5-bisphosphate carboxylase/oxygenase large subunit (rbcL) gene, partial cds; chloroplast.	Costion,C.M.	Unpublished		Dendrophthoinae	Dendrophthoe	genomic DNA	Chloroplast	566	rbcL
Desmaria mutabilis	DQ333852	Calvin and Wilson CL03-07	Desmaria mutabilis internal transcribed spacer 1, partial sequence; 5.8S ribosomal RNA gene, complete sequence; and internal transcribed spacer 2, partial sequence.	Wilson,C.A. and Calvin,C.L.	Am. J. Bot. 93 (5), 787-796 (2006)	Psittacantheae	Notantherinae	Desmaria	genomic DNA	Nucleolus	662	ITS1; 5.8S; ITS2
Desmaria mutabilis	DQ340603	Calvin and Wilson CL03-07	Desmaria mutabilis tRNA-Leu (trnL) gene and trnL-trnF intergenic spacer, partial sequence; chloroplast.	Wilson,C.A. and Calvin,C.L.	Am. J. Bot. 93 (5), 787-796 (2006)	Psittacantheae	Notantherinae	Desmaria	genomic DNA	Chloroplast	615	trnL/LF
Desmaria mutabilis	EF464465	Nickrent 4510A	Desmaria mutabilis 18S ribosomal RNA gene, partial sequence.	Vidal-Russell,R. and Nickrent,D.L.	Mol. Phylogenet. Evol. 47 (2), 523-537 (2008)	Psittacantheae	Notantherinae	Desmaria	genomic DNA	Nucleolus	1694	18S
Desmaria mutabilis	EF464476	Nickrent 4510A	Desmaria mutabilis 26S ribosomal RNA gene, partial sequence.	Vidal-Russell,R. and Nickrent,D.L.	Mol. Phylogenet. Evol. 47 (2), 523-537 (2008)	Psittacantheae	Notantherinae	Desmaria	genomic DNA	Nucleolus	866	25S
Desmaria mutabilis	EF464486	Nickrent 4510A	Desmaria mutabilis tRNA-Leu (trnL) gene, partial sequence; trnL-trnF intergenic spacer, complete sequence; and tRNA-Phe (trnF) gene, partial sequence; chloroplast.	Vidal-Russell,R. and Nickrent,D.L.	Mol. Phylogenet. Evol. 47 (2), 523-537 (2008)	Psittacantheae	Notantherinae	Desmaria	genomic DNA	Chloroplast	581	trnL/LF
Desmaria mutabilis	EF464527	Nickrent 4510A	Desmaria mutabilis ribulose-1,5-bisphosphate carboxylase/oxygenase large subunit (rbcL) gene, partial cds; chloroplast.	Vidal-Russell,R. and Nickrent,D.L.	Mol. Phylogenet. Evol. 47 (2), 523-537 (2008)	Psittacantheae	Notantherinae	Desmaria	genomic DNA	Chloroplast	731	rbcL
Desmaria mutabilis	EF464509	Nickrent 4510A	Desmaria mutabilis maturase K (matK) gene, partial cds; chloroplast.	Vidal-Russell,R. and Nickrent,D.L.	Mol. Phylogenet. Evol. 47 (2), 523-537 (2008)	Psittacantheae	Notantherinae	Desmaria	genomic DNA	Chloroplast	1127	matK
Desmaria mutabilis	KP263298	Nickrent 4151	Desmaria mutabilis voucher Nickrent 4151 acetyl co-A carboxylase (accD) gene, partial cds; chloroplast.	Su,H.-J., Hu,J.-M., Anderson,F.E., Der,J. and Nickrent,D.L.	Taxon 64 (3), 491-506 (2015)	Psittacantheae	Notantherinae	Desmaria	genomic DNA	Chloroplast	1230	accD
Diplatia furcata	L24088	UNKNOWN	Diplatia furcata Barlow 18S ribosomal RNA gene, partial sequence.	Nickrent,D.L. and Duff,R.J.	(in) Moreno,M.T., Cubero,J.I., Berner,D., Joel,D., Musselman,L.J.	Lorantheae	Amyeminae	Diplatia	genomic DNA	Nucleolus	1761	18S
Diplatia furcata	EU544368	Nickrent 2824	Diplatia furcata voucher Nickrent 2824 26S ribosomal RNA gene, partial sequence.	Vidal-Russell,R. and Nickrent,D.L.	Am. J. Bot. 95 (8), 1015-1029 (2008)	Lorantheae	Amyeminae	Diplatia	genomic DNA	Nucleolus	2147	25S
Diplatia furcata	EU544425	Nickrent 2824	Diplatia furcata voucher Nickrent 2824 maturase K (matK) gene, partial cds; chloroplast.	Vidal-Russell,R. and Nickrent,D.L.	Am. J. Bot. 95 (8), 1015-1029 (2008)	Lorantheae	Amyeminae	Diplatia	genomic DNA	Chloroplast	1326	matK
Diplatia furcata	EU544486	Nickrent 2824	Diplatia furcata voucher Nickrent 2824 tRNA-Leu (trnL) gene, partial sequence; trnL-trnF intergenic spacer, complete sequence; and tRNA-Phe (trnF) gene, partial sequence; chloroplast.	Vidal-Russell,R. and Nickrent,D.L.	Am. J. Bot. 95 (8), 1015-1029 (2008)	Lorantheae	Amyeminae	Diplatia	genomic DNA	Chloroplast	560	trnL/LF
Diplatia furcata	KF496292	Ford 4720	Diplatia furcata isolate BATT122-10 ribulose-1,5-bisphosphate carboxylase/oxygenase large subunit (rbcL) gene, partial cds; chloroplast.	Costion,C.M.	Unpublished	Lorantheae	Amyeminae	Diplatia	genomic DNA	Chloroplast	552	rbcL
Diplatia grandibractea	DQ333832	Calvin and Wilson AU01-05	Diplatia grandibractea internal transcribed spacer 1, partial sequence; 5.8S ribosomal RNA gene, complete sequence; and internal transcribed spacer 2, partial sequence.	Wilson,C.A. and Calvin,C.L.	Am. J. Bot. 93 (5), 787-796 (2006)	Lorantheae	Amyeminae	Diplatia	genomic DNA	Nucleolus	652	ITS1; 5.8S; ITS2
Diplatia grandibractea	DQ340581	Calvin and Wilson AU01-05	Diplatia grandibractea tRNA-Leu (trnL) gene and trnL-trnF intergenic spacer, partial sequence; chloroplast.	Wilson,C.A. and Calvin,C.L.	Am. J. Bot. 93 (5), 787-796 (2006)	Lorantheae	Amyeminae	Diplatia	genomic DNA	Chloroplast	593	trnL/LF
Emelianthe panganensis	EU544326	Nickrent 4889	Emelianthe panganensis voucher Nickrent 4889 small subunit ribosomal RNA gene, partial sequence.	Vidal-Russell,R. and Nickrent,D.L.	Am. J. Bot. 95 (8), 1015-1029 (2008)	Lorantheae	Emelianthinae	Emelianthe	genomic DNA	Nucleolus	1661	18S
Emelianthe panganensis	EU544369	Nickrent 4889	Emelianthe panganensis voucher Nickrent 4889 26S ribosomal RNA gene, partial sequence.	Vidal-Russell,R. and Nickrent,D.L.	Am. J. Bot. 95 (8), 1015-1029 (2008)	Lorantheae	Emelianthinae	Emelianthe	genomic DNA	Nucleolus	2038	25S
Emelianthe panganensis	EU544426	Nickrent 4889	Emelianthe panganensis voucher Nickrent 4889 maturase K (matK) gene, partial cds; chloroplast.	Vidal-Russell,R. and Nickrent,D.L.	Am. J. Bot. 95 (8), 1015-1029 (2008)	Lorantheae	Emelianthinae	Emelianthe	genomic DNA	Chloroplast	1317	matK
Emelianthe panganensis	EU544487	Nickrent 4889	Emelianthe panganensis voucher Nickrent 4889 tRNA-Leu (trnL) gene, partial sequence; trnL-trnF intergenic spacer, complete sequence; and tRNA-Phe (trnF) gene, partial sequence; chloroplast.	Vidal-Russell,R. and Nickrent,D.L.	Am. J. Bot. 95 (8), 1015-1029 (2008)	Lorantheae	Emelianthinae	Emelianthe	genomic DNA	Chloroplast	613	trnL/LF
Englerina ramulosa	DQ333828	A. Robertson 7280	Englerina ramulosa internal transcribed spacer 1, partial sequence; 5.8S ribosomal RNA gene, complete sequence; and internal transcribed spacer 2, partial sequence.	Wilson,C.A. and Calvin,C.L.	Am. J. Bot. 93 (5), 787-796 (2006)	Lorantheae	Tapinanthinae	Englerina	genomic DNA	Nucleolus	612	ITS1; 5.8S; ITS2
Englerina ramulosa	DQ340577	A. Robertson 7280	Englerina ramulosa tRNA-Leu (trnL) gene and trnL-trnF intergenic spacer, partial sequence; chloroplast.	Wilson,C.A. and Calvin,C.L.	Am. J. Bot. 93 (5), 787-796 (2006)	Lorantheae	Tapinanthinae	Englerina	genomic DNA	Chloroplast	694	trnL/LF
Englerina ramulosa	EU544370	Nickrent 2984	Englerina ramulosa voucher Nickrent 2984 26S ribosomal RNA gene, partial sequence.	Vidal-Russell,R. and Nickrent,D.L.	Am. J. Bot. 95 (8), 1015-1029 (2008)	Lorantheae	Tapinanthinae	Englerina	genomic DNA	Nucleolus	2047	25S
Englerina ramulosa	EU544427	Nickrent 2984	Englerina ramulosa voucher Nickrent 2984 maturase K-like (matK) gene, partial sequence; chloroplast.	Vidal-Russell,R. and Nickrent,D.L.	Am. J. Bot. 95 (8), 1015-1029 (2008)	Lorantheae	Tapinanthinae	Englerina	genomic DNA	Chloroplast	1349	matK
Englerina ramulosa	EU544470	Nickrent 2984	Englerina ramulosa voucher Nickrent 2984 ribulose-1,5-bisphosphate carboxylase/oxygenase large subunit (rbcL) gene, partial cds; chloroplast.	Vidal-Russell,R. and Nickrent,D.L.	Unpublished	Lorantheae	Tapinanthinae	Englerina	genomic DNA	Chloroplast	833	rbcL
Englerina woodfordioides	L24140	UNKNOWN	Englerina woodfordioides (Schweinf.) M. Gilbert 18S ribosomal RNA gene, partial sequence.	Nickrent,D.L. and Duff,R.J.	(in) Moreno,M.T., Cubero,J.I., Berner,D., Joel,D., Musselman,L.J.	Lorantheae	Tapinanthinae	Englerina	genomic DNA	Nucleolus	1761	18S
Erianthemum dregei	L25679	UNKNOWN	Erianthemum dregei (Eckl. and Zeyh.) Tiegh. 18S ribosomal RNA gene, partial sequence.	Nickrent,D.L. and Duff,R.J.	(in) Moreno,M.T., Cubero,J.I., Berner,D., Joel,D., Musselman,L.J.	Lorantheae	Emelianthinae	Erianthemum	genomic DNA	Nucleolus	1762	18S
Erianthemum dregei	DQ333831	A. Robertson 7366	Erianthemum dregei internal transcribed spacer 1, partial sequence; 5.8S ribosomal RNA gene, complete sequence; and internal transcribed spacer 2, partial sequence.	Wilson,C.A. and Calvin,C.L.	Am. J. Bot. 93 (5), 787-796 (2006)	Lorantheae	Emelianthinae	Erianthemum	genomic DNA	Nucleolus	618	ITS1; 5.8S; ITS2
Erianthemum dregei	DQ340580	A. Robertson 7366	Erianthemum dregei tRNA-Leu (trnL) gene and trnL-trnF intergenic spacer, partial sequence; chloroplast.	Wilson,C.A. and Calvin,C.L.	Am. J. Bot. 93 (5), 787-796 (2006)	Lorantheae	Emelianthinae	Erianthemum	genomic DNA	Chloroplast	651	trnL/LF
Erianthemum dregei	EU544371	Nickrent 2985	Erianthemum dregei voucher Nickrent 2985 26S ribosomal RNA gene, partial sequence.	Vidal-Russell,R. and Nickrent,D.L.	Am. J. Bot. 95 (8), 1015-1029 (2008)	Lorantheae	Emelianthinae	Erianthemum	genomic DNA	Nucleolus	2048	25S
Erianthemum dregei	EU544428	Nickrent 2985	Erianthemum dregei voucher Nickrent 2985 maturase K (matK) gene, partial cds; chloroplast.	Vidal-Russell,R. and Nickrent,D.L.	Am. J. Bot. 95 (8), 1015-1029 (2008)	Lorantheae	Emelianthinae	Erianthemum	genomic DNA	Chloroplast	1392	matK
Erianthemum dregei	EU544488	Nickrent 2985	Erianthemum dregei voucher Nickrent 2985 tRNA-Leu (trnL) gene, partial sequence; trnL-trnF intergenic spacer, complete sequence; and tRNA-Phe (trnF) gene, partial sequence; chloroplast.	Vidal-Russell,R. and Nickrent,D.L.	Am. J. Bot. 95 (8), 1015-1029 (2008)	Lorantheae	Emelianthinae	Erianthemum	genomic DNA	Chloroplast	626	trnL/LF
Gaiadendron punctatum	L26072	UNKNOWN	Gaiadendron punctatum ribulose-1,5-bisphosphate carboxylase/oxygenase large subunit (rbcL) gene, partial cds; chloroplast gene for chloroplast product.	Nickrent,D.L. and Soltis,D.E.	Ann. Mo. Bot. Gard. 82 (2), 208-234 (1995)	Gaiadendreae	[n/a]	Gaiadendron	genomic DNA	Chloroplast	1368	rbcL
Gaiadendron punctatum	L24143	UNKNOWN	Gaiadendron punctatum (R. and P.) G. Don 18S ribosomal RNA gene, partial sequence.	Nickrent,D.L. and Soltis,D.E.	Ann. Mo. Bot. Gard. 82 (2), 208-234 (1995)	Gaiadendreae	[n/a]	Gaiadendron	genomic DNA	Nucleolus	1761	18S
Gaiadendron punctatum	DQ333866	Calvin and Wilson CR01-08	Gaiadendron punctatum internal transcribed spacer 1, partial sequence; 5.8S ribosomal RNA gene, complete sequence; and internal transcribed spacer 2, partial sequence.	Wilson,C.A. and Calvin,C.L.	Am. J. Bot. 93 (5), 787-796 (2006)	Gaiadendreae	[n/a]	Gaiadendron	genomic DNA	Nucleolus	675	ITS1; 5.8S; ITS2
Gaiadendron punctatum	DQ340617	Calvin and Wilson CR01-08	Gaiadendron punctatum tRNA-Leu (trnL) gene and trnL-trnF intergenic spacer, partial sequence; chloroplast.	Wilson,C.A. and Calvin,C.L.	Am. J. Bot. 93 (5), 787-796 (2006)	Gaiadendreae	[n/a]	Gaiadendron	genomic DNA	Chloroplast	661	trnL/LF
Gaiadendron punctatum	DQ787445	Nickrent 2729	Gaiadendron punctatum maturase K (matK) gene, partial cds; chloroplast.	Vidal-Russell,R. and Nickrent,D.L.	Syst. Bot. 32 (3), 560-568 (2007)	Gaiadendreae	[n/a]	Gaiadendron	genomic DNA	Chloroplast	1351	matK
Gaiadendron punctatum	DQ788704	Nickrent 2729	Gaiadendron punctatum internal transcribed spacer 1 and 5.8S ribosomal RNA gene, partial sequence.	Vidal-Russell,R. and Nickrent,D.L.	Syst. Bot. 32 (3), 560-568 (2007)	Gaiadendreae	[n/a]	Gaiadendron	genomic DNA	Nucleolus	409	ITS1; 5.8S; ITS2
Gaiadendron punctatum	DQ788715	Nickrent 2729	Gaiadendron punctatum tRNA-Leu (trnL) gene, partial sequence; trnL-trnF intergenic spacer, complete sequence; and tRNA-Phe (trnF) gene, partial sequence; chloroplast.	Vidal-Russell,R. and Nickrent,D.L.	Syst. Bot. 32 (3), 560-568 (2007)	Gaiadendreae	[n/a]	Gaiadendron	genomic DNA	Chloroplast	627	trnL/LF
Gaiadendron punctatum	DQ790209	D. Nickrent 2729	Gaiadendron punctatum 26S ribosomal RNA gene gene, partial sequence.	Vidal-Russell,R. and Nickrent,D.L.	Mol. Phylogenet. Evol. 47 (2), 523-537 (2008)	Gaiadendreae	[n/a]	Gaiadendron	genomic DNA	Nucleolus	877	25S
Gaiadendron punctatum	DQ790238	D. Nickrent 2729	Gaiadendron punctatum voucher D. Nickrent 2729 acetyl co-A carboxylase (accD) gene, partial cds; chloroplast.	Malecot,V.R. and Nickrent,D.L.	Unpublished	Gaiadendreae	[n/a]	Gaiadendron	genomic DNA	Chloroplast	1174	accD
Gaiadendron punctatum	DQ110147	Brummitt 19395 US	Gaiadendron punctatum F1-ATPase alpha subunit (atp1) gene, partial cds; mitochondrial.	Davis,C.C., Anderson,W.R. and Wurdack,K.J.	Proc. Biol. Sci. 272 (1578), 2237-2242 (2005)	Gaiadendreae	[n/a]	Gaiadendron	genomic DNA	Mitochondrion	1022	atp1
Gaiadendron punctatum	DQ110183	Brummitt 19395 US	Gaiadendron punctatum ATPase subunit 6 (atp6) gene, partial cds; mitochondrial.	Davis,C.C., Anderson,W.R. and Wurdack,K.J.	Proc. Biol. Sci. 272 (1578), 2237-2242 (2005)	Gaiadendreae	[n/a]	Gaiadendron	genomic DNA	Mitochondrion	642	atp6
Gaiadendron punctatum	DQ110271	Brummitt 19395, US	Gaiadendron punctatum NADH dehydrogenase subunit 1 (NADH1) gene, partial sequence; mitochondrial.	Davis,C.C., Anderson,W.R. and Wurdack,K.J.	Proc. Biol. Sci. 272 (1578), 2237-2242 (2005)	Gaiadendreae	[n/a]	Gaiadendron	genomic DNA	Mitochondrion	1770	nad1
Gaiadendron punctatum	DQ110339	Brummitt 19395 US	Gaiadendron punctatum voucher Brummitt 19395 US maturase (matR) gene, partial cds; mitochondrial.	Davis,C.C., Anderson,W.R. and Wurdack,K.J.	Proc. Biol. Sci. 272 (1578), 2237-2242 (2005)	Gaiadendreae	[n/a]	Gaiadendron	genomic DNA	Mitochondrion	1741	matR
Gaiadendron punctatum	JF268488	UNKNOWN	Gaiadendron punctatum RNA polymerase beta chain (rpoC2) gene, partial cds; plastid.	Soltis,D.E., Smith,S.A., Cellinese,N., Wurdack,K.J., Tank,D.C.,	Am. J. Bot. 98 (4), 704-730 (2011)	Gaiadendreae	[n/a]	Gaiadendron	genomic DNA	Chloroplast	991	rpoC2
Gaiadendron sp.	GU351212	N. Munoz et al. 102 (MO)	Gaiadendron sp. Munoz et al. 102 MatR (matR) gene, partial cds; mitochondrial.	Qiu,Y.-L., Li,L., Wang,B., Xue,J., Hendry,T.A., Li,R., Brown,J.W.,	J Syst Evol 48, 391-425 (2010)	Gaiadendreae	[n/a]	Gaiadendron	genomic DNA	Mitochondrion	1617	matR
Gaiadendron sp.	GU351409	N. Munoz et al. 102 (MO)	Gaiadendron sp. Munoz et al. 102 NADH dehydrogenase subunit 5 (nad5) gene, partial cds; mitochondrial.	Qiu,Y.-L., Li,L., Wang,B., Xue,J., Hendry,T.A., Li,R., Brown,J.W.,	J Syst Evol 48, 391-425 (2010)	Gaiadendreae	[n/a]	Gaiadendron	genomic DNA	Mitochondrion	1063	nad5
Gaiadendron sp.	GU351664	N. Munoz et al. 102 (MO)	Gaiadendron sp. Munoz et al. 102 ribosomal protein S3 (rps3) gene, partial cds; mitochondrial.	Qiu,Y.-L., Li,L., Wang,B., Xue,J., Hendry,T.A., Li,R., Brown,J.W.,	J Syst Evol 48, 391-425 (2010)	Gaiadendreae	[n/a]	Gaiadendron	genomic DNA	Mitochondrion	1404	rps3
Globimetula dinklagei	AF039076	UNKNOWN	Globimetula dinklagei 18S ribosomal RNA gene, partial sequence.	Nickrent,D.L. and Duff,R.J.	(in) Moreno,M.T., Cubero,J.I., Berner,D., Joel,D., Musselman,L.J.	Lorantheae	Emelianthinae	Globimetula	genomic DNA	Nucleolus	1749	18S
Globimetula dinklagei	EU544372	Nickrent 3087	Globimetula dinklagei voucher Nickrent 3087 26S ribosomal RNA gene, partial sequence.	Vidal-Russell,R. and Nickrent,D.L.	Am. J. Bot. 95 (8), 1015-1029 (2008)	Lorantheae	Emelianthinae	Globimetula	genomic DNA	Nucleolus	2015	25S
Globimetula dinklagei	EU544429	Nickrent 3087	Globimetula dinklagei voucher Nickrent 3087 maturase K (matK) gene, partial cds; chloroplast.	Vidal-Russell,R. and Nickrent,D.L.	Am. J. Bot. 95 (8), 1015-1029 (2008)	Lorantheae	Emelianthinae	Globimetula	genomic DNA	Chloroplast	1458	matK
Globimetula dinklagei	EU544489	Nickrent 3087	Globimetula dinklagei voucher Nickrent 3087 tRNA-Leu (trnL) gene, partial sequence; trnL-trnF intergenic spacer, complete sequence; and tRNA-Phe (trnF) gene, partial sequence; chloroplast.	Vidal-Russell,R. and Nickrent,D.L.	Am. J. Bot. 95 (8), 1015-1029 (2008)	Lorantheae	Emelianthinae	Globimetula	genomic DNA	Chloroplast	597	trnL/LF
Helicanthes elastica	EU544328	Nickrent 4906	Helicanthes elastica voucher Nickrent 4906 small subunit ribosomal RNA gene, partial sequence.	Vidal-Russell,R. and Nickrent,D.L.	Am. J. Bot. 95 (8), 1015-1029 (2008)	Lorantheae	Amyeminae	Helicanthes	genomic DNA	Nucleolus	607	18S
Helicanthes elastica	EU544375	Nickrent 4906	Helicanthes elastica voucher Nickrent 4906 26S ribosomal RNA gene, partial sequence.	Vidal-Russell,R. and Nickrent,D.L.	Am. J. Bot. 95 (8), 1015-1029 (2008)	Lorantheae	Amyeminae	Helicanthes	genomic DNA	Nucleolus	295	25S
Helicanthes elastica	EU544432	Nickrent 4906	Helicanthes elastica voucher Nickrent 4906 maturase K (matK) gene, partial cds; chloroplast.	Vidal-Russell,R. and Nickrent,D.L.	Am. J. Bot. 95 (8), 1015-1029 (2008)	Lorantheae	Amyeminae	Helicanthes	genomic DNA	Chloroplast	1287	matK
Helixanthera coccinea	EU544373	Nickrent 4019	Helixanthera coccinea voucher Nickrent 4019 26S ribosomal RNA gene, partial sequence.	Vidal-Russell,R. and Nickrent,D.L.	Am. J. Bot. 95 (8), 1015-1029 (2008)	Lorantheae	Dendrophthoinae	Helixanthera	genomic DNA	Nucleolus	2100	25S
Helixanthera coccinea	EU544430	Nickrent 4019	Helixanthera coccinea voucher Nickrent 4019 maturase K (matK) gene, partial cds; chloroplast.	Vidal-Russell,R. and Nickrent,D.L.	Am. J. Bot. 95 (8), 1015-1029 (2008)	Lorantheae	Dendrophthoinae	Helixanthera	genomic DNA	Chloroplast	1311	matK
Helixanthera coccinea	EU544490	Nickrent 4019	Helixanthera coccinea voucher Nickrent 4019 tRNA-Leu (trnL) gene, partial sequence; trnL-trnF intergenic spacer, complete sequence; and tRNA-Phe (trnF) gene, partial sequence; chloroplast.	Vidal-Russell,R. and Nickrent,D.L.	Am. J. Bot. 95 (8), 1015-1029 (2008)	Lorantheae	Dendrophthoinae	Helixanthera	genomic DNA	Chloroplast	646	trnL/LF
Helixanthera cylindrica	EU544327	Nickrent 4037	Helixanthera cylindrica voucher Nickrent 4037 small subunit ribosomal RNA gene, partial sequence.	Vidal-Russell,R. and Nickrent,D.L.	Am. J. Bot. 95 (8), 1015-1029 (2008)	Lorantheae	Dendrophthoinae	Helixanthera	genomic DNA	Nucleolus	1724	18S
Helixanthera cylindrica	EU544374	Nickrent 4037	Helixanthera cylindrica voucher Nickrent 4037 26S ribosomal RNA gene, partial sequence.	Vidal-Russell,R. and Nickrent,D.L.	Am. J. Bot. 95 (8), 1015-1029 (2008)	Lorantheae	Dendrophthoinae	Helixanthera	genomic DNA	Nucleolus	1093	25S
Helixanthera cylindrica	EU544431	Nickrent 4037	Helixanthera cylindrica voucher Nickrent 4037 maturase K (matK) gene, partial cds; chloroplast.	Vidal-Russell,R. and Nickrent,D.L.	Am. J. Bot. 95 (8), 1015-1029 (2008)	Lorantheae	Dendrophthoinae	Helixanthera	genomic DNA	Chloroplast	1342	matK
Helixanthera kirkii	AF039077	UNKNOWN	Helixanthera kirkii 18S ribosomal RNA gene, partial sequence.	Nickrent,D.L. and Duff,R.J.	(in) Moreno,M.T., Cubero,J.I., Berner,D., Joel,D., Musselman,L.J.	Lorantheae	Dendrophthoinae	Helixanthera	genomic DNA	Nucleolus	1745	18S
Helixanthera parasitica	AY191145	UNKNOWN	Helixanthera parasitica tRNA-Leu (trnL) gene, partial sequence; chloroplast gene for chloroplast product.	Han,R.L., Hao,G. and Zhang,D.X.	Unpublished	Lorantheae	Dendrophthoinae	Helixanthera	genomic DNA	Chloroplast	303	trnL/LF
Helixanthera parasitica	DQ333823	Calvin and Wilson B02-01	Helixanthera parasitica internal transcribed spacer 1, partial sequence; 5.8S ribosomal RNA gene, complete sequence; and internal transcribed spacer 2, partial sequence.	Wilson,C.A. and Calvin,C.L.	Am. J. Bot. 93 (5), 787-796 (2006)	Lorantheae	Dendrophthoinae	Helixanthera	genomic DNA	Nucleolus	576	ITS1; 5.8S; ITS2
Helixanthera parasitica	DQ340572	Calvin and Wilson B02-01	Helixanthera parasitica tRNA-Leu (trnL) gene and trnL-trnF intergenic spacer, partial sequence; chloroplast.	Wilson,C.A. and Calvin,C.L.	Am. J. Bot. 93 (5), 787-796 (2006)	Lorantheae	Dendrophthoinae	Helixanthera	genomic DNA	Chloroplast	639	trnL/LF
Helixanthera parasitica	HQ317761	LS28	Helixanthera parasitica voucher LS28 ribulose-1,5-bisphosphate carboxylase/oxygenase large subunit (rbcL) gene, partial cds; chloroplast.	Li,Y.-H., Chen,S.-L., Yao,H. and Luo,K.	Unpublished	Lorantheae	Dendrophthoinae	Helixanthera	genomic DNA	Chloroplast	703	rbcL
Helixanthera parasitica	HQ317762	LS29	Helixanthera parasitica voucher LS29 ribulose-1,5-bisphosphate carboxylase/oxygenase large subunit (rbcL) gene, partial cds; chloroplast.	Li,Y.-H., Chen,S.-L., Yao,H. and Luo,K.	Unpublished	Lorantheae	Dendrophthoinae	Helixanthera	genomic DNA	Chloroplast	703	rbcL
Helixanthera parasitica	HQ317763	LS30	Helixanthera parasitica voucher LS30 ribulose-1,5-bisphosphate carboxylase/oxygenase large subunit (rbcL) gene, partial cds; chloroplast.	Li,Y.-H., Chen,S.-L., Yao,H. and Luo,K.	Unpublished	Lorantheae	Dendrophthoinae	Helixanthera	genomic DNA	Chloroplast	703	rbcL
Helixanthera parasitica	HQ317764	LS31	Helixanthera parasitica voucher LS31 ribulose-1,5-bisphosphate carboxylase/oxygenase large subunit (rbcL) gene, partial cds; chloroplast.	Li,Y.-H., Chen,S.-L., Yao,H. and Luo,K.	Unpublished	Lorantheae	Dendrophthoinae	Helixanthera	genomic DNA	Chloroplast	703	rbcL
Helixanthera parasitica	HQ317802	LS28	Helixanthera parasitica voucher LS28 PsbA (psbA) gene, partial cds; psbA-trnH intergenic spacer, complete sequence; and tRNA-His (trnH) gene, partial sequence; chloroplast.	Li,Y.-H., Chen,S.-L., Yao,H. and Luo,K.	Unpublished	Lorantheae	Dendrophthoinae	Helixanthera	genomic DNA	Chloroplast	352	trnH-psbA
Helixanthera parasitica	HQ317803	LS29	Helixanthera parasitica voucher LS29 PsbA (psbA) gene, partial cds; psbA-trnH intergenic spacer, complete sequence; and tRNA-His (trnH) gene, partial sequence; chloroplast.	Li,Y.-H., Chen,S.-L., Yao,H. and Luo,K.	Unpublished	Lorantheae	Dendrophthoinae	Helixanthera	genomic DNA	Chloroplast	352	trnH-psbA
Helixanthera parasitica	HQ317804	LS30	Helixanthera parasitica voucher LS30 PsbA (psbA) gene, partial cds; psbA-trnH intergenic spacer, complete sequence; and tRNA-His (trnH) gene, partial sequence; chloroplast.	Li,Y.-H., Chen,S.-L., Yao,H. and Luo,K.	Unpublished	Lorantheae	Dendrophthoinae	Helixanthera	genomic DNA	Chloroplast	348	trnH-psbA
Helixanthera parasitica	HQ317805	LS31	Helixanthera parasitica voucher LS31 PsbA (psbA) gene, partial cds; psbA-trnH intergenic spacer, complete sequence; and tRNA-His (trnH) gene, partial sequence; chloroplast.	Li,Y.-H., Chen,S.-L., Yao,H. and Luo,K.	Unpublished	Lorantheae	Dendrophthoinae	Helixanthera	genomic DNA	Chloroplast	352	trnH-psbA
Helixanthera parasitica	JN687573	A. Chveerach_P93.3	Helixanthera parasitica psbA-trnH intergenic spacer, partial sequence; chloroplast.	Kwanda,N., Noikotr,K., Sudmoon,R., Tanee,T. and Chaveerach,A.	J Nat Med (2012) In press	Lorantheae	Dendrophthoinae	Helixanthera	genomic DNA	Chloroplast	311	trnH-psbA
Helixanthera parasitica	JN687565	A. Chveerach_P93.3	Helixanthera parasitica ribulose-1,5-bisphosphate carboxylase/oxygenase large subunit (rbcL) gene, partial cds; chloroplast.	Kwanda,N., Noikotr,K., Sudmoon,R., Tanee,T. and Chaveerach,A.	J Nat Med (2012) In press	Lorantheae	Dendrophthoinae	Helixanthera	genomic DNA	Chloroplast	521	rbcL
Helixanthera parasitica	KP094742	UNKNOWN	Helixanthera parasitica isolate SCBGP318_1 ribulose-1,5-bisphosphate carboxylase/oxygenase large subunit (rbcL) gene, partial cds; chloroplast.	Liu,J., Yan,H.-F., Newmaster,S.G., Pei,N., Ragupathy,S. and	Divers. Distrib. 21 (2), 188-199 (2015)	Lorantheae	Dendrophthoinae	Helixanthera	genomic DNA	Chloroplast	562	rbcL
Helixanthera parasitica	KP094743	UNKNOWN	Helixanthera parasitica isolate SCBGP318_2 ribulose-1,5-bisphosphate carboxylase/oxygenase large subunit (rbcL) gene, partial cds; chloroplast.	Liu,J., Yan,H.-F., Newmaster,S.G., Pei,N., Ragupathy,S. and	Divers. Distrib. 21 (2), 188-199 (2015)	Lorantheae	Dendrophthoinae	Helixanthera	genomic DNA	Chloroplast	562	rbcL
Helixanthera parasitica	KP095914	UNKNOWN	Helixanthera parasitica isolate SCBGP318_1 photosystem II protein D1 (psbA), psbA-trnH intergenic spacer, and tRNA-His (trnH), region; chloroplast.	Liu,J., Yan,H.-F., Newmaster,S.G., Pei,N., Ragupathy,S. and	Divers. Distrib. 21 (2), 188-199 (2015)	Lorantheae	Dendrophthoinae	Helixanthera	genomic DNA	Chloroplast	371	trnH-psbA
Helixanthera parasitica	KP095915	UNKNOWN	Helixanthera parasitica isolate SCBGP318_2 photosystem II protein D1 (psbA), psbA-trnH intergenic spacer, and tRNA-His (trnH), region; chloroplast.	Liu,J., Yan,H.-F., Newmaster,S.G., Pei,N., Ragupathy,S. and	Divers. Distrib. 21 (2), 188-199 (2015)	Lorantheae	Dendrophthoinae	Helixanthera	genomic DNA	Chloroplast	371	trnH-psbA
Helixanthera pulchra	AY191135	UNKNOWN	Helixanthera pierrei tRNA-Leu (trnL) gene, partial sequence; chloroplast gene for chloroplast product.	Han,R.L., Hao,G. and Zhang,D.X.	Unpublished	Lorantheae	Dendrophthoinae	Helixanthera	genomic DNA	Chloroplast	328	trnL/LF
Helixanthera sampsonii	HQ317765	LS33	Helixanthera sampsonii voucher LS33 ribulose-1,5-bisphosphate carboxylase/oxygenase large subunit (rbcL) gene, partial cds; chloroplast.	Li,Y.-H., Chen,S.-L., Yao,H. and Luo,K.	Unpublished	Lorantheae	Dendrophthoinae	Helixanthera	genomic DNA	Chloroplast	703	rbcL
Helixanthera sampsonii	HQ317766	LS34	Helixanthera sampsonii voucher LS34 ribulose-1,5-bisphosphate carboxylase/oxygenase large subunit (rbcL) gene, partial cds; chloroplast.	Li,Y.-H., Chen,S.-L., Yao,H. and Luo,K.	Unpublished	Lorantheae	Dendrophthoinae	Helixanthera	genomic DNA	Chloroplast	703	rbcL
Helixanthera sampsonii	HQ317806	LS33	Helixanthera sampsonii voucher LS33 PsbA (psbA) gene, partial cds; psbA-trnH intergenic spacer, complete sequence; and tRNA-His (trnH) gene, partial sequence; chloroplast.	Li,Y.-H., Chen,S.-L., Yao,H. and Luo,K.	Unpublished	Lorantheae	Dendrophthoinae	Helixanthera	genomic DNA	Chloroplast	355	trnH-psbA
Helixanthera sampsonii	HQ317807	LS34	Helixanthera sampsonii voucher LS34 PsbA (psbA) gene, partial cds; psbA-trnH intergenic spacer, complete sequence; and tRNA-His (trnH) gene, partial sequence; chloroplast.	Li,Y.-H., Chen,S.-L., Yao,H. and Luo,K.	Unpublished	Lorantheae	Dendrophthoinae	Helixanthera	genomic DNA	Chloroplast	355	trnH-psbA
Helixanthera sampsonii	KP093921	UNKNOWN	Helixanthera sampsonii isolate SCBGP388_1 maturase K (matK) gene, partial cds; chloroplast.	Liu,J., Yan,H.-F., Newmaster,S.G., Pei,N., Ragupathy,S. and	Divers. Distrib. 21 (2), 188-199 (2015)	Lorantheae	Dendrophthoinae	Helixanthera	genomic DNA	Chloroplast	781	matK
Helixanthera sampsonii	KP094864	UNKNOWN	Helixanthera sampsonii isolate SCBGP388_1 ribulose-1,5-bisphosphate carboxylase/oxygenase large subunit (rbcL) gene, partial cds; chloroplast.	Liu,J., Yan,H.-F., Newmaster,S.G., Pei,N., Ragupathy,S. and	Divers. Distrib. 21 (2), 188-199 (2015)	Lorantheae	Dendrophthoinae	Helixanthera	genomic DNA	chloroplast Helixanthera sampsonii	562	rbcL
Helixanthera sampsonii	KP095916	UNKNOWN	Helixanthera sampsonii isolate SCBGP388_1 photosystem II protein D1 (psbA), psbA-trnH intergenic spacer, and tRNA-His (trnH), region; chloroplast.	Liu,J., Yan,H.-F., Newmaster,S.G., Pei,N., Ragupathy,S. and	Divers. Distrib. 21 (2), 188-199 (2015)	Lorantheae	Dendrophthoinae	Helixanthera	genomic DNA	chloroplast Helixanthera sampsonii	374	trnH-psbA
Ileostylus micranthus	DQ333841	Calvin and Wilson NZ00-02	Ileostylus micranthus internal transcribed spacer 1, partial sequence; 5.8S ribosomal RNA gene, complete sequence; and internal transcribed spacer 2, partial sequence.	Wilson,C.A. and Calvin,C.L.	Am. J. Bot. 93 (5), 787-796 (2006)	Lorantheae	Ileostylinae	Ileostylus	genomic DNA	Nucleolus	684	ITS1; 5.8S; ITS2
Ileostylus micranthus	DQ340592	Calvin and Wilson NZ00-02	Ileostylus micranthus tRNA-Leu (trnL) gene and trnL-trnF intergenic spacer, partial sequence; chloroplast.	Wilson,C.A. and Calvin,C.L.	Am. J. Bot. 93 (5), 787-796 (2006)	Lorantheae	Ileostylinae	Ileostylus	genomic DNA	Chloroplast	634	trnL/LF
Ileostylus micranthus	EU544329	Nickrent 2741	Ileostylus micranthus voucher Nickrent 2741 small subunit ribosomal RNA gene, partial sequence.	Vidal-Russell,R. and Nickrent,D.L.	Am. J. Bot. 95 (8), 1015-1029 (2008)	Lorantheae	Ileostylinae	Ileostylus	genomic DNA	Nucleolus	1806	18S
Ileostylus micranthus	EU544376	Nickrent 2741	Ileostylus micranthus voucher Nickrent 2741 26S ribosomal RNA gene, partial sequence.	Vidal-Russell,R. and Nickrent,D.L.	Am. J. Bot. 95 (8), 1015-1029 (2008)	Lorantheae	Ileostylinae	Ileostylus	genomic DNA	Nucleolus	1738	25S
Ileostylus micranthus	EU544433	Nickrent 2741	Ileostylus micranthus voucher Nickrent 2741 maturase K (matK) gene, partial cds; chloroplast.	Vidal-Russell,R. and Nickrent,D.L.	Am. J. Bot. 95 (8), 1015-1029 (2008)	Lorantheae	Ileostylinae	Ileostylus	genomic DNA	Chloroplast	1382	matK
Ileostylus micranthus	EU544471	Nickrent 2741	Ileostylus micranthus voucher Nickrent 2741 ribulose-1,5-bisphosphate carboxylase/oxygenase large subunit (rbcL) gene, partial cds; chloroplast.	Vidal-Russell,R. and Nickrent,D.L.	Unpublished	Lorantheae	Ileostylinae	Ileostylus	genomic DNA	Chloroplast	828	rbcL
Ileostylus micranthus	EU544491	Nickrent 2741	Ileostylus micranthus voucher Nickrent 2741 tRNA-Leu (trnL) gene, partial sequence; trnL-trnF intergenic spacer, complete sequence; and tRNA-Phe (trnF) gene, partial sequence; chloroplast.	Vidal-Russell,R. and Nickrent,D.L.	Am. J. Bot. 95 (8), 1015-1029 (2008)	Lorantheae	Ileostylinae	Ileostylus	genomic DNA	Chloroplast	575	trnL/LF
Lepeostegeres lancifolius	EU544379	Nickrent 4041	Lepeostegeres lancifolius voucher Nickrent 4041 26S ribosomal RNA gene, partial sequence.	Vidal-Russell,R. and Nickrent,D.L.	Am. J. Bot. 95 (8), 1015-1029 (2008)	Elytrantheae	[n/a]	Lepeostegeres	genomic DNA	Nucleolus	1991	25S
Lepeostegeres lancifolius	EU544435	Nickrent 4041	Lepeostegeres lancifolius voucher Nickrent 4041 maturase K (matK) gene, partial cds; chloroplast.	Vidal-Russell,R. and Nickrent,D.L.	Am. J. Bot. 95 (8), 1015-1029 (2008)	Elytrantheae	[n/a]	Lepeostegeres	genomic DNA	Chloroplast	1153	matK
Lepidaria cf. forbesii	EU544330	Nickrent 4044	Lepidaria cf. forbesii Nickrent 4044 small subunit ribosomal RNA gene, partial sequence.	Vidal-Russell,R. and Nickrent,D.L.	Am. J. Bot. 95 (8), 1015-1029 (2008)	Elytrantheae	[n/a]	Lepidaria	genomic DNA	Nucleolus	1546	18S
Lepidaria cf. forbesii	EU544378	Nickrent 4044	Lepidaria cf. forbesii Nickrent 4044 26S ribosomal RNA gene, partial sequence.	Vidal-Russell,R. and Nickrent,D.L.	Am. J. Bot. 95 (8), 1015-1029 (2008)	Elytrantheae	[n/a]	Lepidaria	genomic DNA	Nucleolus	2056	25S
Lepidaria cf. forbesii	EU544434	Nickrent 4044	Lepidaria cf. forbesii Nickrent 4044 maturase K (matK) gene, partial cds; chloroplast.	Vidal-Russell,R. and Nickrent,D.L.	Am. J. Bot. 95 (8), 1015-1029 (2008)	Elytrantheae	[n/a]	Lepidaria	genomic DNA	Chloroplast	1407	matK
Lepidaria cf. forbesii	EU544492	Nickrent 4044	Lepidaria cf. forbesii Nickrent 4044 tRNA-Leu (trnL) gene, partial sequence; trnL-trnF intergenic spacer, complete sequence; and tRNA-Phe (trnF) gene, partial sequence; chloroplast.	Vidal-Russell,R. and Nickrent,D.L.	Am. J. Bot. 95 (8), 1015-1029 (2008)	Elytrantheae	[n/a]	Lepidaria	genomic DNA	Chloroplast	618	trnL/LF
Lepidaria oviceps	DQ333851	Calvin and Wilson B02-19	Lepidaria oviceps internal transcribed spacer 1, partial sequence; 5.8S ribosomal RNA gene, complete sequence; and internal transcribed spacer 2, partial sequence.	Wilson,C.A. and Calvin,C.L.	Am. J. Bot. 93 (5), 787-796 (2006)	Elytrantheae	[n/a]	Lepidaria	genomic DNA	Nucleolus	775	ITS1; 5.8S; ITS2
Lepidaria oviceps	DQ340602	Calvin and Wilson B02-19	Lepidaria oviceps tRNA-Leu (trnL) gene and trnL-trnF intergenic spacer, partial sequence; chloroplast.	Wilson,C.A. and Calvin,C.L.	Am. J. Bot. 93 (5), 787-796 (2006)	Elytrantheae	[n/a]	Lepidaria	genomic DNA	Chloroplast	593	trnL/LF
Ligaria cuneifolia	L24152	UNKNOWN	Ligaria cuneifolia (Ruiz and Pavon) Tiegh. 18S ribosomal RNA gene, partial sequence.	Nickrent,D.L. and Duff,R.J.	(in) Moreno,M.T., Cubero,J.I., Berner,D., Joel,D., Musselman,L.J.	Psittacantheae	Ligarinae	Ligaria	genomic DNA	Nucleolus	1754	18S
Ligaria cuneifolia	DQ333853	Calvin and Wilson CL03-01	Ligaria cuneifolia internal transcribed spacer 1, partial sequence; 5.8S ribosomal RNA gene, complete sequence; and internal transcribed spacer 2, partial sequence.	Wilson,C.A. and Calvin,C.L.	Am. J. Bot. 93 (5), 787-796 (2006)	Psittacantheae	Ligarinae	Ligaria	genomic DNA	Nucleolus	658	ITS1; 5.8S; ITS2
Ligaria cuneifolia	DQ340604	Calvin and Wilson CL03-01	Ligaria cuneifolia tRNA-Leu (trnL) gene and trnL-trnF intergenic spacer, partial sequence; chloroplast.	Wilson,C.A. and Calvin,C.L.	Am. J. Bot. 93 (5), 787-796 (2006)	Psittacantheae	Ligarinae	Ligaria	genomic DNA	Chloroplast	603	trnL/LF
Ligaria cuneifolia	DQ442963	G. Amico 76 (BRCU)	Ligaria cuneifolia atpB gene, partial sequence; atpB-rbcL intergenic spacer, complete sequence; and ribulose 1,5-bisphosphate carboxylase/oxygenase large subunit (rbcL) gene, partial cds; chloroplast.	Amico,G.C., Vidal-Russell,R. and Nickrent,D.L.	Am. J. Bot. 94 (4), 558-567 (2007)	Psittacantheae	Ligarinae	Ligaria	genomic DNA	Chloroplast	500	atpB-rbcL
Ligaria cuneifolia	DQ442940	G. Amico 76 (BCRU)	Ligaria cuneifolia tRNA-Leu (trnL) gene and trnL-trnF intergenic spacer, partial sequence; chloroplast.	Amico,G.C., Vidal-Russell,R. and Nickrent,D.L.	Am. J. Bot. 94 (4), 558-567 (2007)	Psittacantheae	Ligarinae	Ligaria	genomic DNA	Chloroplast	571	trnL/LF
Ligaria cuneifolia	DQ442986	G. Amico 76 (BRCU)	Ligaria cuneifolia internal transcribed spacer 1, partial sequence; 5.8S ribosomal RNA gene and internal transcribed spacer 2, complete sequence; and 26S ribosomal RNA gene, partial sequence.	Amico,G.C., Vidal-Russell,R. and Nickrent,D.L.	Am. J. Bot. 94 (4), 558-567 (2007)	Psittacantheae	Ligarinae	Ligaria	genomic DNA	Nucleolus	634	ITS1; 5.8S; ITS2
Ligaria cuneifolia	EF464477	Nickrent 4567	Ligaria cuneifolia 26S ribosomal RNA gene, partial sequence.	Vidal-Russell,R. and Nickrent,D.L.	Mol. Phylogenet. Evol. 47 (2), 523-537 (2008)	Psittacantheae	Ligarinae	Ligaria	genomic DNA	Nucleolus	888	25S
Ligaria cuneifolia	EF464528	Nickrent 4567	Ligaria cuneifolia ribulose-1,5-bisphosphate carboxylase/oxygenase large subunit (rbcL) gene, partial cds; chloroplast.	Vidal-Russell,R. and Nickrent,D.L.	Mol. Phylogenet. Evol. 47 (2), 523-537 (2008)	Psittacantheae	Ligarinae	Ligaria	genomic DNA	Chloroplast	823	rbcL
Ligaria cuneifolia	EF464510	Nickrent 4567	Ligaria cuneifolia maturase K (matK) gene, partial cds; chloroplast.	Vidal-Russell,R. and Nickrent,D.L.	Mol. Phylogenet. Evol. 47 (2), 523-537 (2008)	Psittacantheae	Ligarinae	Ligaria	genomic DNA	Chloroplast	1151	matK
Loranthaceae sp.	JQ594620	RE-5090	Loranthaceae sp. MHPAA216-08 voucher RE-5090 ribulose-1,5-bisphosphate carboxylase/oxygenase large subunit (rbcL) gene, partial cds; chloroplast.	International Barcode of Life (iBOL)	Unpublished	unclassified Loranthaceae	[n/a]	[n/a]	genomic DNA	Chloroplast	561	rbcL
Loranthus delavayi	AY191144	UNKNOWN	Loranthus delavayi isolate 2 tRNA-Leu (trnL) gene, partial sequence; chloroplast gene for chloroplast product.	Han,R.L., Hao,G. and Zhang,D.X.	Unpublished	Lorantheae	Loranthinae	Loranthus	genomic DNA	Chloroplast	291	trnL/LF
Loranthus delavayi	AY191153	UNKNOWN	Loranthus delavayi isolate 1 tRNA-Leu (trnL) gene, partial sequence; chloroplast gene for chloroplast product.	Han,R.L., Hao,G. and Zhang,D.X.	Unpublished	Lorantheae	Loranthinae	Loranthus	genomic DNA	Chloroplast	354	trnL/LF
Loranthus delavayi	DQ453773	CCWU 0033	Loranthus delavayi MADS-box transcription factor (TM6) mRNA, partial cds.	Kramer,E.M., Su,H.J., Wu,C.C. and Hu,J.M.	BMC Evol. Biol. 6, 30 (2006)	Lorantheae	Loranthinae	Loranthus	mRNA	Nucleolus	830	[mRNA]	MADS-box transcription factor
Loranthus delavayi	HQ317767	LS39	Loranthus delavayi voucher LS39 ribulose-1,5-bisphosphate carboxylase/oxygenase large subunit (rbcL) gene, partial cds; chloroplast.	Li,Y.-H., Chen,S.-L., Yao,H. and Luo,K.	Unpublished	Lorantheae	Loranthinae	Loranthus	genomic DNA	Chloroplast	703	rbcL
Loranthus delavayi	HQ317808	LS39	Loranthus delavayi voucher LS39 PsbA (psbA) gene, partial cds; psbA-trnH intergenic spacer, complete sequence; and tRNA-His (trnH) gene, partial sequence; chloroplast.	Li,Y.-H., Chen,S.-L., Yao,H. and Luo,K.	Unpublished	Lorantheae	Loranthinae	Loranthus	genomic DNA	Chloroplast	315	trnH-psbA
Loranthus delavayi	JQ613220	UNKNOWN	Loranthus delavayi 18S ribosomal RNA gene, partial sequence.	Su,H.-J. and Hu,J.-M.	Ann. Bot. 110 (6), 1137-1147 (2012)	Lorantheae	Loranthinae	Loranthus	genomic DNA	Nucleolus	1717	18S
Loranthus delavayi	JQ613248	UNKNOWN	Loranthus delavayi maturase (matR) gene, partial cds; mitochondrial.	Su,H.-J. and Hu,J.-M.	Ann. Bot. 110 (6), 1137-1147 (2012)	Lorantheae	Loranthinae	Loranthus	genomic DNA	Mitochondrion	1683	matR
Loranthus delavayi	JQ613264	UNKNOWN	Loranthus delavayi PISTILLATA-like protein (PI) mRNA, partial cds.	Su,H.-J. and Hu,J.-M.	Ann. Bot. 110 (6), 1137-1147 (2012)	Lorantheae	Loranthinae	Loranthus	mRNA	Nucleolus	630	[mRNA]	PISTILLATA-like protein
Loranthus europaeus	L24153	UNKNOWN	Loranthus europaeus Jacq. 18S ribosomal RNA gene, partial sequence.	Nickrent,D.L. and Duff,R.J.	(in) Moreno,M.T., Cubero,J.I., Berner,D., Joel,D., Musselman,L.J.	Lorantheae	Loranthinae	Loranthus	genomic DNA	Nucleolus	1740	18S
Loranthus europaeus	EU544380	Nickrent 2849	Loranthus europaeus voucher Nickrent 2849 26S ribosomal RNA gene, partial sequence.	Vidal-Russell,R. and Nickrent,D.L.	Am. J. Bot. 95 (8), 1015-1029 (2008)	Lorantheae	Loranthinae	Loranthus	genomic DNA	Nucleolus	2083	25S
Loranthus europaeus	EU544436	Nickrent 5082	Loranthus europaeus voucher Nickrent 5082 maturase K (matK) gene, partial cds; chloroplast.	Vidal-Russell,R. and Nickrent,D.L.	Am. J. Bot. 95 (8), 1015-1029 (2008)	Lorantheae	Loranthinae	Loranthus	genomic DNA	Chloroplast	675	matK
Loranthus europaeus	EU544493	Nickrent 2849	Loranthus europaeus voucher Nickrent 2849 tRNA-Leu (trnL) gene, partial sequence; trnL-trnF intergenic spacer, complete sequence; and tRNA-Phe (trnF) gene, partial sequence; chloroplast.	Vidal-Russell,R. and Nickrent,D.L.	Am. J. Bot. 95 (8), 1015-1029 (2008)	Lorantheae	Loranthinae	Loranthus	genomic DNA	Chloroplast	542	trnL/LF
Loranthus europaeus	HQ917110	GUH-3993	Loranthus europaeus voucher GUH-3993 18S ribosomal RNA gene, partial sequence; and internal transcribed spacer 1, 5.8S ribosomal RNA gene, and internal transcribed spacer 2, complete sequence.	Zanjanchi,P., Sajedi,R.H. and Saeidi Mehrvarz,S.	Submitted (15-JAN-2011) Biology, Faculty of Science, University of	Lorantheae	Loranthinae	Loranthus	genomic DNA	Nucleolus	647	ITS1; 5.8S; ITS2
Loranthus europaeus	HQ917114	GUH-3997	Loranthus europaeus voucher GUH-3997 tRNA-Leu (trnL) gene, partial sequence; trnL-trnF intergenic spacer, complete sequence; and tRNA-Phe (trnF) gene, partial sequence; chloroplast.	Zanjanchi,P., Sajedi,R.H. and Saeidi Mehrvarz,S.	Submitted (16-JAN-2011) Biology, Faculty of Science, University of	Lorantheae	Loranthinae	Loranthus	genomic DNA	Chloroplast	500	trnL/LF
Loranthus europaeus	JQ933393	Chase, 14152, (K)	Loranthus europaeus voucher Chase, 14152, (K) ribulose-1,5-bisphosphate carboxylase/oxygenase large subunit (rbcL) gene, partial cds; plastid.	Saslis-Lagoudakis,C.H., Savolainen,V., Williamson,E.M., Forest,F.,	Proc. Natl. Acad. Sci. U.S.A. 109 (39), 15835-15840 (2012)	Lorantheae	Loranthinae	Loranthus	genomic DNA	Chloroplast	1383	rbcL
Loranthus grewingkii	HQ917111	GUH-3994	Loranthus grewingkii voucher GUH-3994 18S ribosomal RNA gene, partial sequence; and internal transcribed spacer 1, 5.8S ribosomal RNA gene, and internal transcribed spacer 2, complete sequence.	Zanjanchi,P., Sajedi,R.H. and Saeidi Mehrvarz,S.	Submitted (15-JAN-2011) Biology, Faculty of Science, University of	Lorantheae	Loranthinae	Loranthus	genomic DNA	Nucleolus	643	ITS1; 5.8S; ITS2
Loranthus grewingkii	HQ917115	GUH-3998	Loranthus grewingkii voucher GUH-3998 tRNA-Leu (trnL) gene, partial sequence; trnL-trnF intergenic spacer, complete sequence; and tRNA-Phe (trnF) gene, partial sequence; chloroplast.	Zanjanchi,P., Sajedi,R.H. and Saeidi Mehrvarz,S.	Submitted (16-JAN-2011) Biology, Faculty of Science, University of	Lorantheae	Loranthinae	Loranthus	genomic DNA	Chloroplast	490	trnL/LF
Loranthus kaoi	JQ613221	UNKNOWN	Loranthus kaoi 18S ribosomal RNA gene, partial sequence.	Su,H.-J. and Hu,J.-M.	Ann. Bot. 110 (6), 1137-1147 (2012)	Lorantheae	Loranthinae	Loranthus	genomic DNA	Nucleolus	1715	18S
Loranthus kaoi	JQ613241	UNKNOWN	Loranthus kaoi TM6-like protein (TM6) mRNA, partial cds.	Su,H.-J. and Hu,J.-M.	Ann. Bot. 110 (6), 1137-1147 (2012)	Lorantheae	Loranthinae	Loranthus	mRNA	Nucleolus	609	[mRNA]	TM6-like protein
Loranthus kaoi	JQ613249	UNKNOWN	Loranthus kaoi maturase (matR) gene, partial cds; mitochondrial.	Su,H.-J. and Hu,J.-M.	Ann. Bot. 110 (6), 1137-1147 (2012)	Lorantheae	Loranthinae	Loranthus	genomic DNA	Mitochondrion	1494	matR
Loranthus kaoi	JQ613263	UNKNOWN	Loranthus kaoi PISTILLATA-like protein (PI) mRNA, partial cds.	Su,H.-J. and Hu,J.-M.	Ann. Bot. 110 (6), 1137-1147 (2012)	Lorantheae	Loranthinae	Loranthus	mRNA	Nucleolus	630	[mRNA]	PISTILLATA-like protein
Loranthus kaoi	JQ613272	UNKNOWN	Loranthus kaoi RNA polymerase II second largest subunit (RPB2) mRNA, partial cds.	Su,H.-J. and Hu,J.-M.	Ann. Bot. 110 (6), 1137-1147 (2012)	Lorantheae	Loranthinae	Loranthus	mRNA	Nucleolus	1440	[mRNA]	RNA polymerase II second largest subunit
Loranthus kaoi	KP263261	Su 021	Loranthus kaoi voucher Su 021 maturase K (matK) gene, partial cds; chloroplast.	Su,H.-J., Hu,J.-M., Anderson,F.E., Der,J. and Nickrent,D.L.	Taxon 64 (3), 491-506 (2015)	Lorantheae	Loranthinae	Loranthus	genomic DNA	Chloroplast	1202	matK
Loranthus odoratus	EU544331	Nickrent 4977	Loranthus odoratus voucher Nickrent 4977 small subunit ribosomal RNA gene, partial sequence.	Vidal-Russell,R. and Nickrent,D.L.	Am. J. Bot. 95 (8), 1015-1029 (2008)	Lorantheae	Loranthinae	Loranthus	genomic DNA	Nucleolus	1607	18S
Loranthus odoratus	EU544381	Nickrent 4977	Loranthus odoratus voucher Nickrent 4977 26S ribosomal RNA gene, partial sequence.	Vidal-Russell,R. and Nickrent,D.L.	Am. J. Bot. 95 (8), 1015-1029 (2008)	Lorantheae	Loranthinae	Loranthus	genomic DNA	Nucleolus	1753	25S
Loranthus odoratus	EU544494	Nickrent 4977	Loranthus odoratus voucher Nickrent 4977 tRNA-Leu (trnL) gene, partial sequence; trnL-trnF intergenic spacer, complete sequence; and tRNA-Phe (trnF) gene, partial sequence; chloroplast.	Vidal-Russell,R. and Nickrent,D.L.	Am. J. Bot. 95 (8), 1015-1029 (2008)	Lorantheae	Loranthinae	Loranthus	genomic DNA	Chloroplast	569	trnL/LF
Loxanthera speciosa	EU544332	Nickrent 4026	Loxanthera speciosa voucher Nickrent 4026 small subunit ribosomal RNA gene, partial sequence.	Vidal-Russell,R. and Nickrent,D.L.	Am. J. Bot. 95 (8), 1015-1029 (2008)	Elytrantheae	[n/a]	Loxanthera	genomic DNA	Nucleolus	1779	18S
Loxanthera speciosa	EU544382	Nickrent4026	Loxanthera speciosa voucher Nickrent4026 26S ribosomal RNA gene, partial sequence.	Vidal-Russell,R. and Nickrent,D.L.	Am. J. Bot. 95 (8), 1015-1029 (2008)	Elytrantheae	[n/a]	Loxanthera	genomic DNA	Nucleolus	2051	25S
Loxanthera speciosa	EU544437	Nickrent 4026	Loxanthera speciosa voucher Nickrent 4026 maturase K (matK) gene, partial cds; chloroplast.	Vidal-Russell,R. and Nickrent,D.L.	Am. J. Bot. 95 (8), 1015-1029 (2008)	Elytrantheae	[n/a]	Loxanthera	genomic DNA	Chloroplast	1405	matK
Loxanthera speciosa	EU544495	Nickrent 4026	Loxanthera speciosa voucher Nickrent 4026 tRNA-Leu (trnL) gene, partial sequence; trnL-trnF intergenic spacer, complete sequence; and tRNA-Phe (trnF) gene, partial sequence; chloroplast.	Vidal-Russell,R. and Nickrent,D.L.	Am. J. Bot. 95 (8), 1015-1029 (2008)	Elytrantheae	[n/a]	Loxanthera	genomic DNA	Chloroplast	590	trnL/LF
Lysiana exocarpi	L24154	UNKNOWN	Lysiana exocarpi (Behr.) Tiegh. 18S ribosomal RNA gene, partial sequence.	Nickrent,D.L. and Duff,R.J.	(in) Moreno,M.T., Cubero,J.I., Berner,D., Joel,D., Musselman,L.J.	Elytrantheae	[n/a]	Lysiana	genomic DNA	Nucleolus	1767	18S
Lysiana filifolia	EU544333	Nickrent 4449	Lysiana filifolia voucher Nickrent 4449 small subunit ribosomal RNA gene, partial sequence.	Vidal-Russell,R. and Nickrent,D.L.	Am. J. Bot. 95 (8), 1015-1029 (2008)	Elytrantheae	[n/a]	Lysiana	genomic DNA	Nucleolus	1731	18S
Lysiana filifolia	EU544383	Nickrent 4449	Lysiana filifolia voucher Nickrent 4449 26S ribosomal RNA gene, partial sequence.	Vidal-Russell,R. and Nickrent,D.L.	Am. J. Bot. 95 (8), 1015-1029 (2008)	Elytrantheae	[n/a]	Lysiana	genomic DNA	Nucleolus	2010	25S
Lysiana filifolia	EU544438	Nickrent 4449	Lysiana filifolia voucher Nickrent 4449 maturase K (matK) gene, partial cds; chloroplast.	Vidal-Russell,R. and Nickrent,D.L.	Am. J. Bot. 95 (8), 1015-1029 (2008)	Elytrantheae	[n/a]	Lysiana	genomic DNA	Chloroplast	1396	matK
Lysiana filifolia	EU544496	Nickrent 4449	Lysiana filifolia voucher Nickrent 4449 tRNA-Leu (trnL) gene, partial sequence; trnL-trnF intergenic spacer, complete sequence; and tRNA-Phe (trnF) gene, partial sequence; chloroplast.	Vidal-Russell,R. and Nickrent,D.L.	Am. J. Bot. 95 (8), 1015-1029 (2008)	Elytrantheae	[n/a]	Lysiana	genomic DNA	Chloroplast	594	trnL/LF
Lysiana maritima	DQ333848	Calvin and Wilson AU98-19	Lysiana maritima internal transcribed spacer 1, partial sequence; 5.8S ribosomal RNA gene, complete sequence; and internal transcribed spacer 2, partial sequence.	Wilson,C.A. and Calvin,C.L.	Am. J. Bot. 93 (5), 787-796 (2006)	Elytrantheae	[n/a]	Lysiana	genomic DNA	Nucleolus	684	ITS1; 5.8S; ITS2
Lysiana maritima	DQ340599	Calvin and Wilson AU98-19	Lysiana maritima tRNA-Leu (trnL) gene and trnL-trnF intergenic spacer, partial sequence; chloroplast.	Wilson,C.A. and Calvin,C.L.	Am. J. Bot. 93 (5), 787-796 (2006)	Elytrantheae	[n/a]	Lysiana	genomic DNA	Chloroplast	631	trnL/LF
Macrosolen brandisianus	JN687574	A. Chveerach_P16.2	Macrosolen brandisianus psbA-trnH intergenic spacer, partial sequence; chloroplast.	Kwanda,N., Noikotr,K., Sudmoon,R., Tanee,T. and Chaveerach,A.	J Nat Med (2012) In press	Elytrantheae	[n/a]	Macrosolen	genomic DNA	Chloroplast	303	trnH-psbA
Macrosolen brandisianus	JN687566	A. Chveerach_P16.2	Macrosolen brandisianus ribulose-1,5-bisphosphate carboxylase/oxygenase large subunit (rbcL) gene, partial cds; chloroplast.	Kwanda,N., Noikotr,K., Sudmoon,R., Tanee,T. and Chaveerach,A.	J Nat Med (2012) In press	Elytrantheae	[n/a]	Macrosolen	genomic DNA	Chloroplast	522	rbcL
Macrosolen cochinchinensis	AY191136	UNKNOWN	Macrosolen cochinchinensis tRNA-Leu (trnL) gene, partial sequence; chloroplast gene for chloroplast product.	Han,R.L., Hao,G. and Zhang,D.X.	Unpublished	Elytrantheae	[n/a]	Macrosolen	genomic DNA	Chloroplast	311	trnL/LF
Macrosolen cochinchinensis	EU544334	Nickrent 4038	Macrosolen cochinchinensis voucher Nickrent 4038 small subunit ribosomal RNA gene, partial sequence.	Vidal-Russell,R. and Nickrent,D.L.	Am. J. Bot. 95 (8), 1015-1029 (2008)	Elytrantheae	[n/a]	Macrosolen	genomic DNA	Nucleolus	1781	18S
Macrosolen cochinchinensis	EU544384	Nickrent 4038	Macrosolen cochinchinensis voucher Nickrent 4038 26S ribosomal RNA gene, partial sequence.	Vidal-Russell,R. and Nickrent,D.L.	Am. J. Bot. 95 (8), 1015-1029 (2008)	Elytrantheae	[n/a]	Macrosolen	genomic DNA	Nucleolus	2139	25S
Macrosolen cochinchinensis	EU544439	Nickrent 4038	Macrosolen cochinchinensis voucher Nickrent 4038 maturase K (matK) gene, complete cds; chloroplast.	Vidal-Russell,R. and Nickrent,D.L.	Am. J. Bot. 95 (8), 1015-1029 (2008)	Elytrantheae	[n/a]	Macrosolen	genomic DNA	Chloroplast	1536	matK
Macrosolen cochinchinensis	EU544497	Nickrent 4038	Macrosolen cochinchinensis voucher Nickrent 4038 tRNA-Leu (trnL) gene, partial sequence; trnL-trnF intergenic spacer, complete sequence; and tRNA-Phe (trnF) gene, partial sequence; chloroplast.	Vidal-Russell,R. and Nickrent,D.L.	Am. J. Bot. 95 (8), 1015-1029 (2008)	Elytrantheae	[n/a]	Macrosolen	genomic DNA	Chloroplast	531	trnL/LF
Macrosolen cochinchinensis	HQ317768	LS05	Macrosolen cochinchinensis voucher LS05 ribulose-1,5-bisphosphate carboxylase/oxygenase large subunit (rbcL) gene, partial cds; chloroplast.	Li,Y.-H., Chen,S.-L., Yao,H. and Luo,K.	Unpublished	Elytrantheae	[n/a]	Macrosolen	genomic DNA	Chloroplast	703	rbcL
Macrosolen cochinchinensis	HQ317769	LS35	Macrosolen cochinchinensis voucher LS35 ribulose-1,5-bisphosphate carboxylase/oxygenase large subunit (rbcL) gene, partial cds; chloroplast.	Li,Y.-H., Chen,S.-L., Yao,H. and Luo,K.	Unpublished	Elytrantheae	[n/a]	Macrosolen	genomic DNA	Chloroplast	703	rbcL
Macrosolen cochinchinensis	HQ317770	LS36	Macrosolen cochinchinensis voucher LS36 ribulose-1,5-bisphosphate carboxylase/oxygenase large subunit (rbcL) gene, partial cds; chloroplast.	Li,Y.-H., Chen,S.-L., Yao,H. and Luo,K.	Unpublished	Elytrantheae	[n/a]	Macrosolen	genomic DNA	Chloroplast	703	rbcL
Macrosolen cochinchinensis	HQ317809	LS05	Macrosolen cochinchinensis voucher LS05 PsbA (psbA) gene, partial cds; psbA-trnH intergenic spacer, complete sequence; and tRNA-His (trnH) gene, partial sequence; chloroplast.	Li,Y.-H., Chen,S.-L., Yao,H. and Luo,K.	Unpublished	Elytrantheae	[n/a]	Macrosolen	genomic DNA	Chloroplast	331	trnH-psbA
Macrosolen cochinchinensis	HQ317810	LS35	Macrosolen cochinchinensis voucher LS35 PsbA (psbA) gene, partial cds; psbA-trnH intergenic spacer, complete sequence; and tRNA-His (trnH) gene, partial sequence; chloroplast.	Li,Y.-H., Chen,S.-L., Yao,H. and Luo,K.	Unpublished	Elytrantheae	[n/a]	Macrosolen	genomic DNA	Chloroplast	331	trnH-psbA
Macrosolen cochinchinensis	HQ317811	LS36	Macrosolen cochinchinensis voucher LS36 PsbA (psbA) gene, partial cds; psbA-trnH intergenic spacer, complete sequence; and tRNA-His (trnH) gene, partial sequence; chloroplast.	Li,Y.-H., Chen,S.-L., Yao,H. and Luo,K.	Unpublished	Elytrantheae	[n/a]	Macrosolen	genomic DNA	Chloroplast	331	trnH-psbA
Macrosolen cochinchinensis	JN687575	A. Chveerach_P31	Macrosolen cochinchinensis psbA-trnH intergenic spacer, partial sequence; chloroplast.	Kwanda,N., Noikotr,K., Sudmoon,R., Tanee,T. and Chaveerach,A.	J Nat Med (2012) In press	Elytrantheae	[n/a]	Macrosolen	genomic DNA	Chloroplast	277	trnH-psbA
Macrosolen cochinchinensis	JN687567	A. Chveerach_P31	Macrosolen cochinchinensis ribulose-1,5-bisphosphate carboxylase/oxygenase large subunit (rbcL) gene, partial cds; chloroplast.	Kwanda,N., Noikotr,K., Sudmoon,R., Tanee,T. and Chaveerach,A.	J Nat Med (2012) In press	Elytrantheae	[n/a]	Macrosolen	genomic DNA	Chloroplast	522	rbcL
Macrosolen cochinchinensis	JQ933395	I.W.J. Sinclair & D.G. Long, 5781, (E)	Macrosolen cochinchinensis voucher I.W.J. Sinclair & D.G. Long, 5781, (E) ribulose-1,5-bisphosphate carboxylase/oxygenase large subunit (rbcL) gene, partial cds; plastid.	Saslis-Lagoudakis,C.H., Savolainen,V., Williamson,E.M., Forest,F.,	Proc. Natl. Acad. Sci. U.S.A. 109 (39), 15835-15840 (2012)	Elytrantheae	[n/a]	Macrosolen	genomic DNA	Chloroplast	683	rbcL
Macrosolen cochinchinensis	KP093836	UNKNOWN	Macrosolen cochinchinensis isolate SCBGP338_1 maturase K (matK) gene, partial cds; chloroplast.	Liu,J., Yan,H.-F., Newmaster,S.G., Pei,N., Ragupathy,S. and	Divers. Distrib. 21 (2), 188-199 (2015)	Elytrantheae	[n/a]	Macrosolen	genomic DNA	Chloroplast	766	matK
Macrosolen cochinchinensis	KP094775	UNKNOWN	Macrosolen cochinchinensis isolate SCBGP338_1 ribulose-1,5-bisphosphate carboxylase/oxygenase large subunit (rbcL) gene, partial cds; chloroplast.	Liu,J., Yan,H.-F., Newmaster,S.G., Pei,N., Ragupathy,S. and	Divers. Distrib. 21 (2), 188-199 (2015)	Elytrantheae	[n/a]	Macrosolen	genomic DNA	Chloroplast	562	rbcL
Macrosolen cochinchinensis	KP096070	UNKNOWN	Macrosolen cochinchinensis isolate SCBGP338_1 5.8S ribosomal RNA gene, partial sequence; internal transcribed spacer 2, complete sequence; and 28S ribosomal RNA gene, partial sequence.	Liu,J., Yan,H.-F., Newmaster,S.G., Pei,N., Ragupathy,S. and	Divers. Distrib. 21 (2), 188-199 (2015)	Elytrantheae	[n/a]	Macrosolen	genomic DNA	Macrosolen cochinchinensis	407	ITS1; 5.8S; ITS2
Macrosolen cochinchinensis	KP263271	Su 052	Macrosolen cochinchinensis voucher Su 052 maturase R (matR) gene, partial cds; mitochondrial.	Su,H.-J., Hu,J.-M., Anderson,F.E., Der,J. and Nickrent,D.L.	Taxon 64 (3), 491-506 (2015)	Elytrantheae	[n/a]	Macrosolen	genomic DNA	Mitochondrion	1731	matR
Macrosolen cochinchinensis	KP263282	Nickrent 4038	Macrosolen cochinchinensis voucher Nickrent 4038 ribulose-1,5-bisphosphate carboxylase/oxygenase large subunit (rbcL) gene, partial cds; chloroplast.	Su,H.-J., Hu,J.-M., Anderson,F.E., Der,J. and Nickrent,D.L.	Taxon 64 (3), 491-506 (2015)	Elytrantheae	[n/a]	Macrosolen	genomic DNA	Chloroplast	683	rbcL
Macrosolen cochinchinensis	KP263343	Su 052	Macrosolen cochinchinensis voucher Su 052 RNA polymerase II second largest subunit (RPB2) gene, partial cds.	Su,H.-J., Hu,J.-M., Anderson,F.E., Der,J. and Nickrent,D.L.	Taxon 64 (3), 491-506 (2015)	Elytrantheae	[n/a]	Macrosolen	genomic DNA	Nucleolus	1516	RPB2
Macrosolen melintangensis	DQ333842	Calvin and Wilson B02-17	Macrosolen melintangensis internal transcribed spacer 1, partial sequence; 5.8S ribosomal RNA gene, complete sequence; and internal transcribed spacer 2, partial sequence.	Wilson,C.A. and Calvin,C.L.	Am. J. Bot. 93 (5), 787-796 (2006)	Elytrantheae	[n/a]	Macrosolen	genomic DNA	Nucleolus	782	ITS1; 5.8S; ITS2
Macrosolen melintangensis	DQ340593	Calvin and Wilson B02-17	Macrosolen melintangensis tRNA-Leu (trnL) gene and trnL-trnF intergenic spacer, partial sequence; chloroplast.	Wilson,C.A. and Calvin,C.L.	Am. J. Bot. 93 (5), 787-796 (2006)	Elytrantheae	[n/a]	Macrosolen	genomic DNA	Chloroplast	681	trnL/LF
Macrosolen tricolor	HQ317771	LS37	Macrosolen tricolor voucher LS37 ribulose-1,5-bisphosphate carboxylase/oxygenase large subunit (rbcL) gene, partial cds; chloroplast.	Li,Y.-H., Chen,S.-L., Yao,H. and Luo,K.	Unpublished	Elytrantheae	[n/a]	Macrosolen	genomic DNA	Chloroplast	703	rbcL
Macrosolen tricolor	HQ317772	LS38	Macrosolen tricolor voucher LS38 ribulose-1,5-bisphosphate carboxylase/oxygenase large subunit (rbcL) gene, partial cds; chloroplast.	Li,Y.-H., Chen,S.-L., Yao,H. and Luo,K.	Unpublished	Elytrantheae	[n/a]	Macrosolen	genomic DNA	Chloroplast	703	rbcL
Macrosolen tricolor	HQ317812	LS37	Macrosolen tricolor voucher LS37 PsbA (psbA) gene, partial cds; psbA-trnH intergenic spacer, complete sequence; and tRNA-His (trnH) gene, partial sequence; chloroplast.	Li,Y.-H., Chen,S.-L., Yao,H. and Luo,K.	Unpublished	Elytrantheae	[n/a]	Macrosolen	genomic DNA	Chloroplast	356	trnH-psbA
Macrosolen tricolor	HQ317813	LS38	Macrosolen tricolor voucher LS38 PsbA (psbA) gene, partial cds; psbA-trnH intergenic spacer, complete sequence; and tRNA-His (trnH) gene, partial sequence; chloroplast.	Li,Y.-H., Chen,S.-L., Yao,H. and Luo,K.	Unpublished	Elytrantheae	[n/a]	Macrosolen	genomic DNA	Chloroplast	356	trnH-psbA
Moquiniella rubra	AF039078	UNKNOWN	Moquiniella rubra 18S ribosomal RNA gene, partial sequence.	Nickrent,D.L. and Duff,R.J.	(in) Moreno,M.T., Cubero,J.I., Berner,D., Joel,D., Musselman,L.J.	Lorantheae	Emelianthinae	Moquiniella	genomic DNA	Nucleolus	1755	18S
Moquiniella rubra	DQ790132	D. Nickrent 3042	Moquiniella rubra voucher D. Nickrent 3042 ribulose-1,5-bisphosphate carboxylase/oxygenase large subunit (rbcL) gene, partial cds; chloroplast.	Malecot,V. and Nickrent,D.L.	Syst. Bot. 33 (1), 97-106 (2008)	Lorantheae	Emelianthinae	Moquiniella	genomic DNA	Chloroplast	1422	rbcL
Moquiniella rubra	DQ790171	D. Nickrent 3042	Moquiniella rubra voucher D. Nickrent 3042 maturase K (matK) gene, partial cds; chloroplast.	Malecot,V. and Nickrent,D.L.	Syst. Bot. 33 (1), 97-106 (2008)	Lorantheae	Emelianthinae	Moquiniella	genomic DNA	Chloroplast	1151	matK
Moquiniella rubra	DQ790207	D. Nickrent 3042	Moquiniella rubra 26S ribosomal RNA gene gene, partial sequence.	Vidal-Russell,R. and Nickrent,D.L.	Mol. Phylogenet. Evol. 47 (2), 523-537 (2008)	Lorantheae	Emelianthinae	Moquiniella	genomic DNA	Nucleolus	882	25S
Moquiniella rubra	AM235021	RBGK 5742	Moquiniella rubra chloroplast partial rbcL gene for ribulose bisphosphate carboxylase large subunit, specimen voucher RBGK 5742.	Forest,F., Grenyer,R., Rouget,M., Davies,T.J., Cowling,R.M.,	Nature 445 (7129), 757-760 (2007)	Lorantheae	Emelianthinae	Moquiniella	genomic DNA	Chloroplast	1319	rbcL
Moquiniella rubra	EF464489	Nickrent 3042	Moquiniella rubra tRNA-Leu (trnL) gene, partial sequence; trnL-trnF intergenic spacer, complete sequence; and tRNA-Phe (trnF) gene, partial sequence; chloroplast.	Vidal-Russell,R. and Nickrent,D.L.	Mol. Phylogenet. Evol. 47 (2), 523-537 (2008)	Lorantheae	Emelianthinae	Moquiniella	genomic DNA	Chloroplast	582	trnL/LF
Moquiniella rubra	GQ497649	UNKNOWN	Moquiniella rubra ATP synthase beta subunit (atpB) gene, partial cds; chloroplast.	Fiz-Palacios,O., Schneider,H., Heinrichs,J. and Savolainen,V.	BMC Evol. Biol. 11, 341 (2011)	Lorantheae	Emelianthinae	Moquiniella	genomic DNA	Chloroplast	1156	atpB
Muellerina bidwillii	AY572199	Calvin & Wilson AU01-16	Muellerina bidwillii internal transcribed spacer 1, 5.8S ribosomal RNA gene, and internal transcribed spacer 2, complete sequence.	Wilson,C.A. and Senge,A.M.M.	Unpublished	Lorantheae	Ileostylinae	Muellerina	genomic DNA	Nucleolus	717	ITS1; 5.8S; ITS2
Muellerina celastroides	AY572198	Calvin & Wilson AU99-11	Muellerina celastroides internal transcribed spacer 1, 5.8S ribosomal RNA gene, and internal transcribed spacer 2, complete sequence.	Wilson,C.A. and Calvin,C.L.	Unpublished	Lorantheae	Ileostylinae	Muellerina	genomic DNA	Nucleolus	685	ITS1; 5.8S; ITS2
Muellerina celastroides	DQ340590	Calvin and Wilson AU99-11	Muellerina celastroides tRNA-Leu (trnL) gene, partial sequence; and trnL-trnF intergenic spacer, complete sequence; chloroplast.	Wilson,C.A. and Calvin,C.L.	Am. J. Bot. 93 (5), 787-796 (2006)	Lorantheae	Ileostylinae	Muellerina	genomic DNA	Chloroplast	599	trnL/LF
Muellerina eucalyptoides	AY572197	Calvin & Wilson AU99-05	Muellerina eucalyptoides internal transcribed spacer 1, 5.8S ribosomal RNA gene, and internal transcribed spacer 2, complete sequence.	Wilson,C.A. and Calvin,C.L.	Unpublished	Lorantheae	Ileostylinae	Muellerina	genomic DNA	Nucleolus	686	ITS1; 5.8S; ITS2
Muellerina eucalyptoides	DQ340591	Calvin and Wilson AU99-05	Muellerina eucalyptoides tRNA-Leu (trnL) gene and trnL-trnF intergenic spacer, partial sequence; chloroplast.	Wilson,C.A. and Calvin,C.L.	Am. J. Bot. 93 (5), 787-796 (2006)	Lorantheae	Ileostylinae	Muellerina	genomic DNA	Chloroplast	605	trnL/LF
Muellerina eucalyptoides	EU544335	Nickrent 4310	Muellerina eucalyptoides voucher Nickrent 4310 small subunit ribosomal RNA gene, partial sequence.	Vidal-Russell,R. and Nickrent,D.L.	Am. J. Bot. 95 (8), 1015-1029 (2008)	Lorantheae	Ileostylinae	Muellerina	genomic DNA	Nucleolus	1632	18S
Muellerina eucalyptoides	EU544385	Nickrent 4310	Muellerina eucalyptoides voucher Nickrent 4310 26S ribosomal RNA gene, partial sequence.	Vidal-Russell,R. and Nickrent,D.L.	Am. J. Bot. 95 (8), 1015-1029 (2008)	Lorantheae	Ileostylinae	Muellerina	genomic DNA	Nucleolus	2048	25S
Muellerina eucalyptoides	EU544440	Nickrent 4310	Muellerina eucalyptoides voucher Nickrent 4310 maturase K (matK) gene, partial cds; chloroplast.	Vidal-Russell,R. and Nickrent,D.L.	Am. J. Bot. 95 (8), 1015-1029 (2008)	Lorantheae	Ileostylinae	Muellerina	genomic DNA	Chloroplast	1355	matK
Muellerina eucalyptoides	EU544472	Nickrent 4310	Muellerina eucalyptoides voucher Nickrent 4310 ribulose-1,5-bisphosphate carboxylase/oxygenase large subunit (rbcL) gene, partial cds; chloroplast.	Vidal-Russell,R. and Nickrent,D.L.	Unpublished	Lorantheae	Ileostylinae	Muellerina	genomic DNA	Chloroplast	830	rbcL
Muellerina eucalyptoides	EU544498	Nickrent 4310	Muellerina eucalyptoides voucher Nickrent 4310 tRNA-Leu (trnL) gene, partial sequence; trnL-trnF intergenic spacer, complete sequence; and tRNA-Phe (trnF) gene, partial sequence; chloroplast.	Vidal-Russell,R. and Nickrent,D.L.	Am. J. Bot. 95 (8), 1015-1029 (2008)	Lorantheae	Ileostylinae	Muellerina	genomic DNA	Chloroplast	637	trnL/LF
Muellerina flexialabastra	AY572196	Calvin & Wilson AU01-20	Muellerina flexialabastra internal transcribed spacer 1, 5.8S ribosomal RNA gene, and internal transcribed spacer 2, complete sequence.	Wilson,C.A. and Senge,A.M.M.	Unpublished	Lorantheae	Ileostylinae	Muellerina	genomic DNA	Nucleolus	684	ITS1; 5.8S; ITS2
Muellerina myrtifolia	AY572200	Calvin & Wilson AU01-21	Muellerina myrtifolia internal transcribed spacer 1, 5.8S ribosomal RNA gene, and internal transcribed spacer 2, complete sequence.	Wilson,C.A. and Senge,A.M.M.	Unpublished	Lorantheae	Ileostylinae	Muellerina	genomic DNA	Nucleolus	712	ITS1; 5.8S; ITS2
Muellerina myrtifolia	KM895120	129308532	Muellerina myrtifolia voucher 129308532 trnH-psbA intergenic spacer, partial sequence; chloroplast.	Shapcott,A., Forster,P.I., Guymer,G.P., McDonald,W.J., Faith,D.P.,	PLoS ONE 10 (3), E0122164 (2015)	Lorantheae	Ileostylinae	Muellerina	genomic DNA	chloroplast Muellerina myrtifolia	297	trnH-psbA
Muellerina myrtifolia	KM895688	129308532	Muellerina myrtifolia voucher 129308532 ribulose-1,5-bisphosphate carboxylase/oxygenase large subunit (rbcL) gene, partial cds; chloroplast.	Shapcott,A., Forster,P.I., Guymer,G.P., McDonald,W.J., Faith,D.P.,	PLoS ONE 10 (3), E0122164 (2015)	Lorantheae	Ileostylinae	Muellerina	genomic DNA	chloroplast Muellerina myrtifolia	553	rbcL
Notanthera heterophylla	DQ333855	Calvin and Wilson Cl03-03	Notanthera heterophylla internal transcribed spacer 1, partial sequence; 5.8S ribosomal RNA gene, complete sequence; and internal transcribed spacer 2, partial sequence.	Wilson,C.A. and Calvin,C.L.	Am. J. Bot. 93 (5), 787-796 (2006)	Psittacantheae	Notantherinae	Notanthera	genomic DNA	Nucleolus	663	ITS1; 5.8S; ITS2
Notanthera heterophylla	DQ340606	Calvin and Wilson Cl03-03	Notanthera heterophylla tRNA-Leu (trnL) gene and trnL-trnF intergenic spacer, partial sequence; chloroplast.	Wilson,C.A. and Calvin,C.L.	Am. J. Bot. 93 (5), 787-796 (2006)	Psittacantheae	Notantherinae	Notanthera	genomic DNA	Chloroplast	666	trnL/LF
Notanthera heterophylla	DQ442962	G. Amico 151 (BRCU)	Notanthera heterophylla atpB gene, partial sequence; atpB-rbcL intergenic spacer, complete sequence; and ribulose 1,5-bisphosphate carboxylase/oxygenase large subunit (rbcL) gene, partial cds; chloroplast.	Amico,G.C., Vidal-Russell,R. and Nickrent,D.L.	Am. J. Bot. 94 (4), 558-567 (2007)	Psittacantheae	Notantherinae	Notanthera	genomic DNA	Chloroplast	660	atpB-rbcL
Notanthera heterophylla	DQ442939	G. Amico 151 (BCRU)	Notanthera heterophylla tRNA-Leu (trnL) gene and trnL-trnF intergenic spacer, partial sequence; chloroplast.	Amico,G.C., Vidal-Russell,R. and Nickrent,D.L.	Am. J. Bot. 94 (4), 558-567 (2007)	Psittacantheae	Notantherinae	Notanthera	genomic DNA	Chloroplast	629	trnL/LF
Notanthera heterophylla	DQ442985	G. Amico 151 (BRCU)	Notanthera heterophylla 18S ribosomal RNA gene, partial sequence; internal transcribed spacer 1 and 5.8S ribosomal RNA gene, complete sequence; and internal transcribed spacer 2, partial sequence.	Amico,G.C., Vidal-Russell,R. and Nickrent,D.L.	Am. J. Bot. 94 (4), 558-567 (2007)	Psittacantheae	Notantherinae	Notanthera	genomic DNA	Nucleolus	558	ITS1; 5.8S; ITS2
Notanthera heterophylla	EF464466	Nickrent 4372	Notanthera heterophylla 18S ribosomal RNA gene, partial sequence.	Vidal-Russell,R. and Nickrent,D.L.	Mol. Phylogenet. Evol. 47 (2), 523-537 (2008)	Psittacantheae	Notantherinae	Notanthera	genomic DNA	Nucleolus	1631	18S
Notanthera heterophylla	EF464478	Nickrent 4372	Notanthera heterophylla 26S ribosomal RNA gene, partial sequence.	Vidal-Russell,R. and Nickrent,D.L.	Mol. Phylogenet. Evol. 47 (2), 523-537 (2008)	Psittacantheae	Notantherinae	Notanthera	genomic DNA	Nucleolus	938	25S
Notanthera heterophylla	EF464529	Nickrent 4372	Notanthera heterophylla ribulose-1,5-bisphosphate carboxylase/oxygenase large subunit (rbcL) gene, partial cds; chloroplast.	Vidal-Russell,R. and Nickrent,D.L.	Mol. Phylogenet. Evol. 47 (2), 523-537 (2008)	Psittacantheae	Notantherinae	Notanthera	genomic DNA	Chloroplast	1356	rbcL
Notanthera heterophylla	EF464511	Nickrent 4372	Notanthera heterophylla maturase K-like (matK) gene, partial sequence; chloroplast.	Vidal-Russell,R. and Nickrent,D.L.	Mol. Phylogenet. Evol. 47 (2), 523-537 (2008)	Psittacantheae	Notantherinae	Notanthera	genomic DNA	Chloroplast	1078	matK
Nuytsia floribunda	DQ333867	Calvin and Wilson AU01-22	Nuytsia floribunda internal transcribed spacer 1, partial sequence; 5.8S ribosomal RNA gene, complete sequence; and internal transcribed spacer 2, partial sequence.	Wilson,C.A. and Calvin,C.L.	Am. J. Bot. 93 (5), 787-796 (2006)	Nuytsieae	[n/a]	Nuytsia	genomic DNA	Nucleolus	671	ITS1; 5.8S; ITS2
Nuytsia floribunda	DQ340618	Calvin and Wilson AU01-22	Nuytsia floribunda tRNA-Leu (trnL) gene and trnL-trnF intergenic spacer, partial sequence; chloroplast.	Wilson,C.A. and Calvin,C.L.	Am. J. Bot. 93 (5), 787-796 (2006)	Nuytsieae	[n/a]	Nuytsia	genomic DNA	Chloroplast	826	trnL/LF
Nuytsia floribunda	DQ787446	Nickrent 2747	Nuytsia floribunda maturase K (matK) gene, partial cds; chloroplast.	Vidal-Russell,R. and Nickrent,D.L.	Syst. Bot. 32 (3), 560-568 (2007)	Nuytsieae	[n/a]	Nuytsia	genomic DNA	Chloroplast	1354	matK
Nuytsia floribunda	DQ788705	Nickrent 2747	Nuytsia floribunda internal transcribed spacer 1, partial sequence; 5.8S ribosomal RNA gene and internal transcribed spacer 2, complete sequence; and 26S ribosomal RNA gene, partial sequence.	Vidal-Russell,R. and Nickrent,D.L.	Syst. Bot. 32 (3), 560-568 (2007)	Nuytsieae	[n/a]	Nuytsia	genomic DNA	Nucleolus	693	ITS1; 5.8S; ITS2
Nuytsia floribunda	DQ788716	Nickrent 3080	Nuytsia floribunda tRNA-Leu (trnL) gene, partial sequence; trnL-trnF intergenic spacer, complete sequence; and tRNA-Phe (trnF) gene, partial sequence; chloroplast.	Vidal-Russell,R. and Nickrent,D.L.	Syst. Bot. 32 (3), 560-568 (2007)	Nuytsieae	[n/a]	Nuytsia	genomic DNA	Chloroplast	837	trnL/LF
Nuytsia floribunda	DQ790103	D. Nickrent 2747	Nuytsia floribunda voucher D. Nickrent 2747 small subunit ribosomal RNA gene, partial sequence.	Malecot,V. and Nickrent,D.L.	Syst. Bot. 33 (1), 97-106 (2008)	Nuytsieae	[n/a]	Nuytsia	genomic DNA	Nucleolus	1805	18S
Nuytsia floribunda	DQ790134	D. Nickrent 2747	Nuytsia floribunda voucher D. Nickrent 2747 ribulose-1,5-bisphosphate carboxylase/oxygenase large subunit (rbcL) gene, partial cds; chloroplast.	Malecot,V. and Nickrent,D.L.	Syst. Bot. 33 (1), 97-106 (2008)	Nuytsieae	[n/a]	Nuytsia	genomic DNA	Chloroplast	838	rbcL
Nuytsia floribunda	DQ790210	D. Nickrent 2747	Nuytsia floribunda 26S ribosomal RNA gene gene, partial sequence.	Vidal-Russell,R. and Nickrent,D.L.	Mol. Phylogenet. Evol. 47 (2), 523-537 (2008)	Nuytsieae	[n/a]	Nuytsia	genomic DNA	Nucleolus	873	25S
Nuytsia floribunda	DQ790239	D. Nickrent 2747	Nuytsia floribunda voucher D. Nickrent 2747 acetyl co-A carboxylase (accD) gene, partial cds; chloroplast.	Malecot,V.R. and Nickrent,D.L.	Unpublished	Nuytsieae	[n/a]	Nuytsia	genomic DNA	Chloroplast	1171	accD
Nuytsia floribunda	DQ110282	Spjut et al. 7311, US	Nuytsia floribunda NADH dehydrogenase subunit 1 (NADH1) gene, partial sequence; mitochondrial.	Davis,C.C., Anderson,W.R. and Wurdack,K.J.	Proc. Biol. Sci. 272 (1578), 2237-2242 (2005)	Nuytsieae	[n/a]	Nuytsia	genomic DNA	Mitochondrion	1698	nad1
Nuytsia floribunda	DQ110349	Spjut et al. 7311 US	Nuytsia floribunda voucher Spjut et al. 7311 US maturase (matR) gene, partial cds; mitochondrial.	Davis,C.C., Anderson,W.R. and Wurdack,K.J.	Proc. Biol. Sci. 272 (1578), 2237-2242 (2005)	Nuytsieae	[n/a]	Nuytsia	genomic DNA	Mitochondrion	1725	matR
Nuytsia floribunda	KP263349	Mucina s.n.	Nuytsia floribunda voucher Mucina s.n. RNA polymerase II second largest subunit (RPB2) gene, partial cds.	Su,H.-J., Hu,J.-M., Anderson,F.E., Der,J. and Nickrent,D.L.	Taxon 64 (3), 491-506 (2015)	Nuytsieae	[n/a]	Nuytsia	genomic DNA	Nucleolus	1596	RPB2
Oedina pendens	EU544336	Nickrent 4329	Oedina pendens voucher Nickrent 4329 small subunit ribosomal RNA gene, partial sequence.	Vidal-Russell,R. and Nickrent,D.L.	Am. J. Bot. 95 (8), 1015-1029 (2008)	Lorantheae	Tapinanthinae	Oedina	genomic DNA	Nucleolus	1725	18S
Oedina pendens	EU544386	Nickrent 4329	Oedina pendens voucher Nickrent 4329 26S ribosomal RNA gene, partial sequence.	Vidal-Russell,R. and Nickrent,D.L.	Am. J. Bot. 95 (8), 1015-1029 (2008)	Lorantheae	Tapinanthinae	Oedina	genomic DNA	Nucleolus	2087	25S
Oedina pendens	EU544441	Nickrent 4329	Oedina pendens voucher Nickrent 4329 maturase K (matK) gene, partial cds; chloroplast.	Vidal-Russell,R. and Nickrent,D.L.	Am. J. Bot. 95 (8), 1015-1029 (2008)	Lorantheae	Tapinanthinae	Oedina	genomic DNA	Chloroplast	1387	matK
Oedina pendens	EU544499	Nickrent 4329	Oedina pendens voucher Nickrent 4329 tRNA-Leu (trnL) gene, partial sequence; trnL-trnF intergenic spacer, complete sequence; and tRNA-Phe (trnF) gene, partial sequence; chloroplast.	Vidal-Russell,R. and Nickrent,D.L.	Am. J. Bot. 95 (8), 1015-1029 (2008)	Lorantheae	Tapinanthinae	Oedina	genomic DNA	Chloroplast	518	trnL/LF
Oliverella rubroviridis	EU544337	Nickrent 4330	Oliverella rubroviridis voucher Nickrent 4330 small subunit ribosomal RNA gene, partial sequence.	Vidal-Russell,R. and Nickrent,D.L.	Am. J. Bot. 95 (8), 1015-1029 (2008)	Lorantheae	Emelianthinae	Oliverella	genomic DNA	Nucleolus	1720	18S
Oliverella rubroviridis	EU544387	Nickrent 4330	Oliverella rubroviridis voucher Nickrent 4330 26S ribosomal RNA gene, partial sequence.	Vidal-Russell,R. and Nickrent,D.L.	Am. J. Bot. 95 (8), 1015-1029 (2008)	Lorantheae	Emelianthinae	Oliverella	genomic DNA	Nucleolus	1866	25S
Oliverella rubroviridis	EU544442	Nickrent 4330	Oliverella rubroviridis voucher Nickrent 4330 maturase K (matK) gene, partial cds; chloroplast.	Vidal-Russell,R. and Nickrent,D.L.	Am. J. Bot. 95 (8), 1015-1029 (2008)	Lorantheae	Emelianthinae	Oliverella	genomic DNA	Chloroplast	1415	matK
Oncella ambigua	EU544338	Nickrent 4673	Oncella ambigua voucher Nickrent 4673 small subunit ribosomal RNA gene, partial sequence.	Vidal-Russell,R. and Nickrent,D.L.	Am. J. Bot. 95 (8), 1015-1029 (2008)	Lorantheae	Tapinanthinae	Oncella	genomic DNA	Nucleolus	1780	18S
Oncella ambigua	EU544443	Nickrent 4673	Oncella ambigua voucher Nickrent 4673 maturase K-like (matK) gene, partial sequence; chloroplast.	Vidal-Russell,R. and Nickrent,D.L.	Am. J. Bot. 95 (8), 1015-1029 (2008)	Lorantheae	Tapinanthinae	Oncella	genomic DNA	Chloroplast	1462	matK
Oncocalyx schimperi	DQ333825	Calvin and Wilson Y88-02	Oncocalyx schimperi internal transcribed spacer 1 and 5.8S ribosomal RNA gene, partial sequence.	Wilson,C.A. and Calvin,C.L.	Am. J. Bot. 93 (5), 787-796 (2006)	Lorantheae	Tapinanthinae	Oncocalyx	genomic DNA	Nucleolus	257	ITS1; 5.8S; ITS2
Oncocalyx schimperi	DQ340574	Calvin and Wilson Y88-02	Oncocalyx schimperi tRNA-Leu (trnL) gene and trnL-trnF intergenic spacer, partial sequence; chloroplast.	Wilson,C.A. and Calvin,C.L.	Am. J. Bot. 93 (5), 787-796 (2006)	Lorantheae	Tapinanthinae	Oncocalyx	genomic DNA	Chloroplast	634	trnL/LF
Oncocalyx sulfureus	EU544339	Nickrent 2850	Oncocalyx sulfureus voucher Nickrent 2850 small subunit ribosomal RNA gene, partial sequence.	Vidal-Russell,R. and Nickrent,D.L.	Am. J. Bot. 95 (8), 1015-1029 (2008)	Lorantheae	Tapinanthinae	Oncocalyx	genomic DNA	Nucleolus	1686	18S
Oncocalyx sulfureus	EU544388	Nickrent 2850	Oncocalyx sulfureus voucher Nickrent 2850 26S ribosomal RNA gene, partial sequence.	Vidal-Russell,R. and Nickrent,D.L.	Am. J. Bot. 95 (8), 1015-1029 (2008)	Lorantheae	Tapinanthinae	Oncocalyx	genomic DNA	Nucleolus	1943	25S
Oncocalyx sulfureus	EU544444	Nickrent 2850	Oncocalyx sulfureus voucher Nickrent 2850 maturase K (matK) gene, partial cds; chloroplast.	Vidal-Russell,R. and Nickrent,D.L.	Am. J. Bot. 95 (8), 1015-1029 (2008)	Lorantheae	Tapinanthinae	Oncocalyx	genomic DNA	Chloroplast	1392	matK
Oncocalyx sulfureus	EU544500	Nickrent 2850	Oncocalyx sulfureus voucher Nickrent 2850 tRNA-Leu (trnL) gene, partial sequence; trnL-trnF intergenic spacer, complete sequence; and tRNA-Phe (trnF) gene, partial sequence; chloroplast.	Vidal-Russell,R. and Nickrent,D.L.	Am. J. Bot. 95 (8), 1015-1029 (2008)	Lorantheae	Tapinanthinae	Oncocalyx	genomic DNA	Chloroplast	613	trnL/LF
Oryctanthus cordifolius	JQ592409	BioBot06595	Oryctanthus cordifolius voucher BioBot06595 ribulose-1,5-bisphosphate carboxylase/oxygenase large subunit (rbcL) gene, partial cds; chloroplast.	International Barcode of Life (iBOL)	Unpublished	Psittacantheae	Psittacanthinae	Oryctanthus	genomic DNA	Chloroplast	509	rbcL
Oryctanthus occidentalis	L24408	UNKNOWN	Oryctanthus occidentalis (Presl.) Urban 18S ribosomal RNA gene, partial sequence.	Nickrent,D.L. and Duff,R.J.	(in) Moreno,M.T., Cubero,J.I., Berner,D., Joel,D., Musselman,L.J.	Psittacantheae	Psittacanthinae	Oryctanthus	genomic DNA	Nucleolus	1753	18S
Oryctanthus occidentalis	BD075329	UNKNOWN	Method of identifying molecule homing to angiogenesis vascular system in tumor.	Ruoslahti,E. and Pasqualini,R.	Patent: JP 2001516055-A 5 25-SEP-2001;	Psittacantheae	Psittacanthinae	Oryctanthus	genomic DNA	Nucleolus	38	[unknown]
Oryctanthus occidentalis	BD075330	UNKNOWN	Method of identifying molecule homing to angiogenesis vascular system in tumor.	Ruoslahti,E. and Pasqualini,R.	Patent: JP 2001516055-A 6 25-SEP-2001;	Psittacantheae	Psittacanthinae	Oryctanthus	genomic DNA	Nucleolus	38	[unknown]
Oryctanthus occidentalis	BD075331	UNKNOWN	Method of identifying molecule homing to angiogenesis vascular system in tumor.	Ruoslahti,E. and Pasqualini,R.	Patent: JP 2001516055-A 7 25-SEP-2001;	Psittacantheae	Psittacanthinae	Oryctanthus	genomic DNA	Nucleolus	38	[unknown]
Oryctanthus occidentalis	BD075332	UNKNOWN	Method of identifying molecule homing to angiogenesis vascular system in tumor.	Ruoslahti,E. and Pasqualini,R.	Patent: JP 2001516055-A 8 25-SEP-2001;	Psittacantheae	Psittacanthinae	Oryctanthus	genomic DNA	Nucleolus	42	[unknown]
Oryctanthus occidentalis	BD075333	UNKNOWN	Method of identifying molecule homing to angiogenesis vascular system in tumor.	Ruoslahti,E. and Pasqualini,R.	Patent: JP 2001516055-A 9 25-SEP-2001;	Psittacantheae	Psittacanthinae	Oryctanthus	genomic DNA	Nucleolus	42	[unknown]
Oryctanthus occidentalis	BD075334	UNKNOWN	Method of identifying molecule homing to angiogenesis vascular system in tumor.	Ruoslahti,E. and Pasqualini,R.	Patent: JP 2001516055-A 10 25-SEP-2001;	Psittacantheae	Psittacanthinae	Oryctanthus	genomic DNA	Nucleolus	41	[unknown]
Oryctanthus occidentalis	BD075335	UNKNOWN	Method of identifying molecule homing to angiogenesis vascular system in tumor.	Ruoslahti,E. and Pasqualini,R.	Patent: JP 2001516055-A 11 25-SEP-2001;	Psittacantheae	Psittacanthinae	Oryctanthus	genomic DNA	Nucleolus	40	[unknown]
Oryctanthus occidentalis	BD075336	UNKNOWN	Method of identifying molecule homing to angiogenesis vascular system in tumor.	Ruoslahti,E. and Pasqualini,R.	Patent: JP 2001516055-A 12 25-SEP-2001;	Psittacantheae	Psittacanthinae	Oryctanthus	genomic DNA	Nucleolus	45	[unknown]
Oryctanthus occidentalis	BD075337	UNKNOWN	Method of identifying molecule homing to angiogenesis vascular system in tumor.	Ruoslahti,E. and Pasqualini,R.	Patent: JP 2001516055-A 13 25-SEP-2001;	Psittacantheae	Psittacanthinae	Oryctanthus	genomic DNA	Nucleolus	42	[unknown]
Oryctanthus occidentalis	BD075338	UNKNOWN	Method of identifying molecule homing to angiogenesis vascular system in tumor.	Ruoslahti,E. and Pasqualini,R.	Patent: JP 2001516055-A 14 25-SEP-2001;	Psittacantheae	Psittacanthinae	Oryctanthus	genomic DNA	Nucleolus	42	[unknown]
Oryctanthus occidentalis	BD075339	UNKNOWN	Method of identifying molecule homing to angiogenesis vascular system in tumor.	Ruoslahti,E. and Pasqualini,R.	Patent: JP 2001516055-A 15 25-SEP-2001;	Psittacantheae	Psittacanthinae	Oryctanthus	genomic DNA	Nucleolus	42	[unknown]
Oryctanthus occidentalis	BD075340	UNKNOWN	Method of identifying molecule homing to angiogenesis vascular system in tumor.	Ruoslahti,E. and Pasqualini,R.	Patent: JP 2001516055-A 16 25-SEP-2001;	Psittacantheae	Psittacanthinae	Oryctanthus	genomic DNA	Nucleolus	44	[unknown]
Oryctanthus occidentalis	BD075341	UNKNOWN	Method of identifying molecule homing to angiogenesis vascular system in tumor.	Ruoslahti,E. and Pasqualini,R.	Patent: JP 2001516055-A 17 25-SEP-2001;	Psittacantheae	Psittacanthinae	Oryctanthus	genomic DNA	Nucleolus	46	[unknown]
Oryctanthus occidentalis	BD075342	UNKNOWN	Method of identifying molecule homing to angiogenesis vascular system in tumor.	Ruoslahti,E. and Pasqualini,R.	Patent: JP 2001516055-A 18 25-SEP-2001;	Psittacantheae	Psittacanthinae	Oryctanthus	genomic DNA	Nucleolus	41	[unknown]
Oryctanthus occidentalis	BD075343	UNKNOWN	Method of identifying molecule homing to angiogenesis vascular system in tumor.	Ruoslahti,E. and Pasqualini,R.	Patent: JP 2001516055-A 19 25-SEP-2001;	Psittacantheae	Psittacanthinae	Oryctanthus	genomic DNA	Nucleolus	41	[unknown]
Oryctanthus occidentalis	AX709293	UNKNOWN	Sequence 28 from Patent WO02064822.	Kuhn,M. and Mergemeier,S.	Patent: WO 02064822-A2 28 22-AUG-2002;	Psittacantheae	Psittacanthinae	Oryctanthus	unassigned DNA	Nucleolus	1139	[unknown]
Oryctanthus occidentalis	DQ333862	Calvin and Wilson CR01-11	Oryctanthus occidentalis internal transcribed spacer 1, partial sequence; 5.8S ribosomal RNA gene, complete sequence; and internal transcribed spacer 2, partial sequence.	Wilson,C.A. and Calvin,C.L.	Am. J. Bot. 93 (5), 787-796 (2006)	Psittacantheae	Psittacanthinae	Oryctanthus	genomic DNA	Nucleolus	674	ITS1; 5.8S; ITS2
Oryctanthus occidentalis	DQ340613	Calvin and Wilson CR01-11	Oryctanthus occidentalis tRNA-Leu (trnL) gene and trnL-trnF intergenic spacer, partial sequence; chloroplast.	Wilson,C.A. and Calvin,C.L.	Am. J. Bot. 93 (5), 787-796 (2006)	Psittacantheae	Psittacanthinae	Oryctanthus	genomic DNA	Chloroplast	638	trnL/LF
Oryctanthus occidentalis	EU544389	Nickrent 2763	Oryctanthus occidentalis voucher Nickrent 2763 26S ribosomal RNA gene, partial sequence.	Vidal-Russell,R. and Nickrent,D.L.	Am. J. Bot. 95 (8), 1015-1029 (2008)	Psittacantheae	Psittacanthinae	Oryctanthus	genomic DNA	Nucleolus	2137	25S
Oryctanthus occidentalis	EU544445	Nickrent 2763	Oryctanthus occidentalis voucher Nickrent 2763 maturase K (matK) gene, partial cds; chloroplast.	Vidal-Russell,R. and Nickrent,D.L.	Am. J. Bot. 95 (8), 1015-1029 (2008)	Psittacantheae	Psittacanthinae	Oryctanthus	genomic DNA	Chloroplast	1369	matK
Oryctanthus occidentalis	EU544501	Nickrent 2763	Oryctanthus occidentalis voucher Nickrent 2763 tRNA-Leu (trnL) gene and trnL-trnF intergenic spacer, partial sequence; chloroplast.	Vidal-Russell,R. and Nickrent,D.L.	Am. J. Bot. 95 (8), 1015-1029 (2008)	Psittacantheae	Psittacanthinae	Oryctanthus	genomic DNA	Chloroplast	396	trnL/LF
Passovia pyrifolia	L24412	UNKNOWN	Phthirusa pyrifolia (H.B.K.) Eichler 18S ribosomal RNA gene, partial sequence.	Nickrent,D.L. and Duff,R.J.	(in) Moreno,M.T., Cubero,J.I., Berner,D., Joel,D., Musselman,L.J.	Psittacantheae	Psittacanthinae	Passovia	genomic DNA	Nucleolus	1763	18S
Passovia pyrifolia	DQ333857	Calvin and Wilson CR01-03	Phthirusa pyrifolia internal transcribed spacer 1, partial sequence; 5.8S ribosomal RNA gene, complete sequence; and internal transcribed spacer 2, partial sequence.	Wilson,C.A. and Calvin,C.L.	Am. J. Bot. 93 (5), 787-796 (2006)	Psittacantheae	Psittacanthinae	Passovia	genomic DNA	Nucleolus	671	ITS1; 5.8S; ITS2
Passovia pyrifolia	DQ340608	Calvin and Wilson CR01-03	Phthirusa pyrifolia tRNA-Leu (trnL) gene and trnL-trnF intergenic spacer, partial sequence; chloroplast.	Wilson,C.A. and Calvin,C.L.	Am. J. Bot. 93 (5), 787-796 (2006)	Psittacantheae	Psittacanthinae	Passovia	genomic DNA	Chloroplast	630	trnL/LF
Passovia pyrifolia	EU544392	Nickrent 2762	Phthirusa pyrifolia voucher Nickrent 2762 26S ribosomal RNA gene, partial sequence.	Vidal-Russell,R. and Nickrent,D.L.	Am. J. Bot. 95 (8), 1015-1029 (2008)	Psittacantheae	Psittacanthinae	Passovia	genomic DNA	Nucleolus	2097	25S
Passovia pyrifolia	EU544448	Nickrent 2762	Phthirusa pyrifolia voucher Nickrent 2762 maturase K (matK) gene, partial cds; chloroplast.	Vidal-Russell,R. and Nickrent,D.L.	Am. J. Bot. 95 (8), 1015-1029 (2008)	Psittacantheae	Psittacanthinae	Passovia	genomic DNA	Chloroplast	1267	matK
Passovia pyrifolia	EU544504	Nickrent 2762	Phthirusa pyrifolia voucher Nickrent 2762 tRNA-Leu (trnL) gene, partial sequence; trnL-trnF intergenic spacer, complete sequence; and tRNA-Phe (trnF) gene, partial sequence; chloroplast.	Vidal-Russell,R. and Nickrent,D.L.	Am. J. Bot. 95 (8), 1015-1029 (2008)	Psittacantheae	Psittacanthinae	Passovia	genomic DNA	Chloroplast	644	trnL/LF
Peraxilla tetrapetala	DQ333846	Calvin and Wilson NZ98-03	Peraxilla tetrapetala internal transcribed spacer 1, partial sequence; 5.8S ribosomal RNA gene, complete sequence; and internal transcribed spacer 2, partial sequence.	Wilson,C.A. and Calvin,C.L.	Am. J. Bot. 93 (5), 787-796 (2006)	Elytrantheae	[n/a]	Peraxilla	genomic DNA	Nucleolus	703	ITS1; 5.8S; ITS2
Peraxilla tetrapetala	DQ340597	Calvin and Wilson NZ98-03	Peraxilla tetrapetala tRNA-Leu (trnL) gene and trnL-trnF intergenic spacer, partial sequence; chloroplast.	Wilson,C.A. and Calvin,C.L.	Am. J. Bot. 93 (5), 787-796 (2006)	Elytrantheae	[n/a]	Peraxilla	genomic DNA	Chloroplast	636	trnL/LF
Peraxilla tetrapetala	EU544340	Nickrent 2744	Peraxilla tetrapetala voucher Nickrent 2744 small subunit ribosomal RNA gene, partial sequence.	Vidal-Russell,R. and Nickrent,D.L.	Am. J. Bot. 95 (8), 1015-1029 (2008)	Elytrantheae	[n/a]	Peraxilla	genomic DNA	Nucleolus	1676	18S
Peraxilla tetrapetala	EU544390	Nickrent 2744	Peraxilla tetrapetala voucher Nickrent 2744 26S ribosomal RNA gene, partial sequence.	Vidal-Russell,R. and Nickrent,D.L.	Am. J. Bot. 95 (8), 1015-1029 (2008)	Elytrantheae	[n/a]	Peraxilla	genomic DNA	Nucleolus	2037	25S
Peraxilla tetrapetala	EU544446	Nickrent 2744	Peraxilla tetrapetala voucher Nickrent 2744 maturase K (matK) gene, partial cds; chloroplast.	Vidal-Russell,R. and Nickrent,D.L.	Am. J. Bot. 95 (8), 1015-1029 (2008)	Elytrantheae	[n/a]	Peraxilla	genomic DNA	Chloroplast	1340	matK
Peraxilla tetrapetala	EU544473	Nickrent 2744	Peraxilla tetrapetala voucher Nickrent 2744 ribulose-1,5-bisphosphate carboxylase/oxygenase large subunit (rbcL) gene, partial cds; chloroplast.	Vidal-Russell,R. and Nickrent,D.L.	Unpublished	Elytrantheae	[n/a]	Peraxilla	genomic DNA	Chloroplast	830	rbcL
Peraxilla tetrapetala	EU544502	Nickrent 2744	Peraxilla tetrapetala voucher Nickrent 2744 tRNA-Leu (trnL) gene, partial sequence; trnL-trnF intergenic spacer, complete sequence; and tRNA-Phe (trnF) gene, partial sequence; chloroplast.	Vidal-Russell,R. and Nickrent,D.L.	Am. J. Bot. 95 (8), 1015-1029 (2008)	Elytrantheae	[n/a]	Peraxilla	genomic DNA	Chloroplast	616	trnL/LF
Peraxilla tetrapetala	JQ933439	P. Douglass, 8714, (RNG)	Peraxilla tetrapetala voucher P. Douglass, 8714, (RNG) ribulose-1,5-bisphosphate carboxylase/oxygenase large subunit (rbcL) gene, partial cds; plastid.	Saslis-Lagoudakis,C.H., Savolainen,V., Williamson,E.M., Forest,F.,	Proc. Natl. Acad. Sci. U.S.A. 109 (39), 15835-15840 (2012)	Elytrantheae	[n/a]	Peraxilla	genomic DNA	Chloroplast	1383	rbcL
Peraxilla tetrapetala	KP263316	Nickrent 2744	Peraxilla tetrapetala voucher Nickrent 2744 acetyl co-A carboxylase (accD) gene, partial cds; chloroplast.	Su,H.-J., Hu,J.-M., Anderson,F.E., Der,J. and Nickrent,D.L.	Taxon 64 (3), 491-506 (2015)	Elytrantheae	[n/a]	Peraxilla	genomic DNA	Chloroplast	1143	accD
Phragmanthera crassicaulis	EU544341	Nickrent 3037	Phragmanthera crassicaulis voucher Nickrent 3037 small subunit ribosomal RNA gene, partial sequence.	Vidal-Russell,R. and Nickrent,D.L.	Am. J. Bot. 95 (8), 1015-1029 (2008)	Lorantheae	Emelianthinae	Phragmanthera	genomic DNA	Nucleolus	1725	18S
Phragmanthera crassicaulis	EU544391	Phragmanthera 3037	Phragmanthera crassicaulis voucher Phragmanthera 3037 26S ribosomal RNA gene, partial sequence.	Vidal-Russell,R. and Nickrent,D.L.	Am. J. Bot. 95 (8), 1015-1029 (2008)	Lorantheae	Emelianthinae	Phragmanthera	genomic DNA	Nucleolus	2145	25S
Phragmanthera crassicaulis	EU544447	Nickrent 3037	Phragmanthera crassicaulis voucher Nickrent 3037 maturase K (matK) gene, partial cds; chloroplast.	Vidal-Russell,R. and Nickrent,D.L.	Am. J. Bot. 95 (8), 1015-1029 (2008)	Lorantheae	Emelianthinae	Phragmanthera	genomic DNA	Chloroplast	1373	matK
Phragmanthera crassicaulis	EU544503	Nickrent 3037	Phragmanthera crassicaulis voucher Nickrent 3037 tRNA-Leu (trnL) gene, partial sequence; trnL-trnF intergenic spacer, complete sequence; and tRNA-Phe (trnF) gene, partial sequence; chloroplast.	Vidal-Russell,R. and Nickrent,D.L.	Am. J. Bot. 95 (8), 1015-1029 (2008)	Lorantheae	Emelianthinae	Phragmanthera	genomic DNA	Chloroplast	586	trnL/LF
Phragmanthera regularis	DQ333830	Calvin and Wilson Y88-01	Phragmanthera regularis internal transcribed spacer 1, partial sequence; 5.8S ribosomal RNA gene, complete sequence; and internal transcribed spacer 2, partial sequence.	Wilson,C.A. and Calvin,C.L.	Am. J. Bot. 93 (5), 787-796 (2006)	Lorantheae	Emelianthinae	Phragmanthera	genomic DNA	Nucleolus	564	ITS1; 5.8S; ITS2
Phragmanthera regularis	DQ340579	Calvin and Wilson Y88-01	Phragmanthera regularis tRNA-Leu (trnL) gene and trnL-trnF intergenic spacer, partial sequence; chloroplast.	Wilson,C.A. and Calvin,C.L.	Am. J. Bot. 93 (5), 787-796 (2006)	Lorantheae	Emelianthinae	Phragmanthera	genomic DNA	Chloroplast	633	trnL/LF
Phthirusa inorna	DQ333858	Calvin and Wilson MX03-04	Ixocactus inornus internal transcribed spacer 1, partial sequence; 5.8S ribosomal RNA gene, complete sequence; and internal transcribed spacer 2, partial sequence.	Wilson,C.A. and Calvin,C.L.	Am. J. Bot. 93 (5), 787-796 (2006)	Psittacantheae	Psittacanthinae	Phthirusa	genomic DNA	Nucleolus	686	ITS1; 5.8S; ITS2
Phthirusa inorna	DQ340609	Calvin and Wilson MX03-04	Ixocactus inornus tRNA-Leu (trnL) gene and trnL-trnF intergenic spacer, partial sequence; chloroplast.	Wilson,C.A. and Calvin,C.L.	Am. J. Bot. 93 (5), 787-796 (2006)	Psittacantheae	Psittacanthinae	Phthirusa	genomic DNA	Chloroplast	688	trnL/LF
Phthirusa sp.	EU544377	Nickrent 4332	Ixocactus sp. Nickrent 4332 26S ribosomal RNA gene, partial sequence.	Vidal-Russell,R. and Nickrent,D.L.	Am. J. Bot. 95 (8), 1015-1029 (2008)	Psittacantheae	Psittacanthinae	Phthirusa	genomic DNA	Nucleolus	1648	25S
Plicosepalus curviflorus	DQ333826	Calvin and Wilson Y88-03	Plicosepalus curviflorus internal transcribed spacer 1, partial sequence; 5.8S ribosomal RNA gene, complete sequence; and internal transcribed spacer 2, partial sequence.	Wilson,C.A. and Calvin,C.L.	Am. J. Bot. 93 (5), 787-796 (2006)	Lorantheae	Tapinanthinae	Plicosepalus	genomic DNA	Nucleolus	606	ITS1; 5.8S; ITS2
Plicosepalus curviflorus	DQ340575	Calvin and Wilson Y88-03	Plicosepalus curviflorus tRNA-Leu (trnL) gene and trnL-trnF intergenic spacer, partial sequence; chloroplast.	Wilson,C.A. and Calvin,C.L.	Am. J. Bot. 93 (5), 787-796 (2006)	Lorantheae	Tapinanthinae	Plicosepalus	genomic DNA	Chloroplast	607	trnL/LF
Plicosepalus sagittifolius	EU544342	Nickrent 2852	Plicosepalus sagittifolius voucher Nickrent 2852 small subunit ribosomal RNA gene, partial sequence.	Vidal-Russell,R. and Nickrent,D.L.	Am. J. Bot. 95 (8), 1015-1029 (2008)	Lorantheae	Tapinanthinae	Plicosepalus	genomic DNA	Nucleolus	1591	18S
Plicosepalus sagittifolius	EU544393	Nickrent 2852	Plicosepalus sagittifolius voucher Nickrent 2852 26S ribosomal RNA gene, partial sequence.	Vidal-Russell,R. and Nickrent,D.L.	Am. J. Bot. 95 (8), 1015-1029 (2008)	Lorantheae	Tapinanthinae	Plicosepalus	genomic DNA	Nucleolus	1917	25S
Plicosepalus sagittifolius	EU544449	Nickrent 2852	Plicosepalus sagittifolius voucher Nickrent 2852 maturase K (matK) gene, partial cds; chloroplast.	Vidal-Russell,R. and Nickrent,D.L.	Am. J. Bot. 95 (8), 1015-1029 (2008)	Lorantheae	Tapinanthinae	Plicosepalus	genomic DNA	Chloroplast	1420	matK
Psittacanthus angustifolius	L24414	UNKNOWN	Psittacanthus angustifolius 18S ribosomal RNA gene, partial sequence.	Nickrent,D.L. and Duff,R.J.	(in) Moreno,M.T., Cubero,J.I., Berner,D., Joel,D., Musselman,L.J.	Psittacantheae	Psittacanthinae	Psittacanthus	genomic DNA	Nucleolus	1753	18S
Psittacanthus calyculatus	EU544394	Nickrent 4043	Psittacanthus calyculatus voucher Nickrent 4043 26S ribosomal RNA gene, partial sequence.	Vidal-Russell,R. and Nickrent,D.L.	Am. J. Bot. 95 (8), 1015-1029 (2008)	Psittacantheae	Psittacanthinae	Psittacanthus	genomic DNA	Nucleolus	1639	25S
Psittacanthus calyculatus	EU544450	Nickrent 4043	Psittacanthus calyculatus voucher Nickrent 4043 maturase K-like (matK) gene, partial sequence; chloroplast.	Vidal-Russell,R. and Nickrent,D.L.	Am. J. Bot. 95 (8), 1015-1029 (2008)	Psittacantheae	Psittacanthinae	Psittacanthus	genomic DNA	Chloroplast	1256	matK
Psittacanthus schiedeanus	DQ333859	Calvin and Wilson CR01-09	Psittacanthus schiedeanus internal transcribed spacer 1, partial sequence; 5.8S ribosomal RNA gene, complete sequence; and internal transcribed spacer 2, partial sequence.	Wilson,C.A. and Calvin,C.L.	Am. J. Bot. 93 (5), 787-796 (2006)	Psittacantheae	Psittacanthinae	Psittacanthus	genomic DNA	Nucleolus	670	ITS1; 5.8S; ITS2
Psittacanthus schiedeanus	DQ340610	Calvin and Wilson CR01-09	Psittacanthus schiedeanus tRNA-Leu (trnL) gene and trnL-trnF intergenic spacer, partial sequence; chloroplast.	Wilson,C.A. and Calvin,C.L.	Am. J. Bot. 93 (5), 787-796 (2006)	Psittacantheae	Psittacanthinae	Psittacanthus	genomic DNA	Chloroplast	613	trnL/LF
Psittacanthus schiedeanus	KP027826	UNKNOWN	Psittacanthus schiedeanus microsatellite Psi1 sequence.	Gonzalez,C., Harvey,N. and Ornelas,J.F.	Appl Plant Sci 3 (1), 1400099 (2015)				genomic DNA	Psittacanthus schiedeanus	250	[µSat]
Psittacanthus schiedeanus	KP027827	UNKNOWN	Psittacanthus schiedeanus microsatellite Psi29 sequence.	Gonzalez,C., Harvey,N. and Ornelas,J.F.	Appl Plant Sci 3 (1), 1400099 (2015)				genomic DNA	Psittacanthus schiedeanus	368	[µSat]
Psittacanthus schiedeanus	KP027828	UNKNOWN	Psittacanthus schiedeanus microsatellite Psi6 sequence.	Gonzalez,C., Harvey,N. and Ornelas,J.F.	Appl Plant Sci 3 (1), 1400099 (2015)				genomic DNA	Psittacanthus schiedeanus	475	[µSat]
Psittacanthus schiedeanus	KP027829	UNKNOWN	Psittacanthus schiedeanus microsatellite Psi8 sequence.	Gonzalez,C., Harvey,N. and Ornelas,J.F.	Appl Plant Sci 3 (1), 1400099 (2015)				genomic DNA	Psittacanthus schiedeanus	593	[µSat]
Psittacanthus schiedeanus	KP027830	UNKNOWN	Psittacanthus schiedeanus microsatellite Psi25 sequence.	Gonzalez,C., Harvey,N. and Ornelas,J.F.	Appl Plant Sci 3 (1), 1400099 (2015)				genomic DNA	Psittacanthus schiedeanus	202	[µSat]
Psittacanthus schiedeanus	KP027831	UNKNOWN	Psittacanthus schiedeanus microsatellite Psi15 sequence.	Gonzalez,C., Harvey,N. and Ornelas,J.F.	Appl Plant Sci 3 (1), 1400099 (2015)				genomic DNA	Psittacanthus schiedeanus	148	[µSat]
Psittacanthus schiedeanus	KP027832	UNKNOWN	Psittacanthus schiedeanus microsatellite Psi2 sequence.	Gonzalez,C., Harvey,N. and Ornelas,J.F.	Appl Plant Sci 3 (1), 1400099 (2015)				genomic DNA	Psittacanthus schiedeanus	460	[µSat]
Psittacanthus schiedeanus	KP027833	UNKNOWN	Psittacanthus schiedeanus microsatellite Psi16 sequence.	Gonzalez,C., Harvey,N. and Ornelas,J.F.	Appl Plant Sci 3 (1), 1400099 (2015)				genomic DNA	Psittacanthus schiedeanus	303	[µSat]
Psittacanthus schiedeanus	KP027834	UNKNOWN	Psittacanthus schiedeanus microsatellite Psi17 sequence.	Gonzalez,C., Harvey,N. and Ornelas,J.F.	Appl Plant Sci 3 (1), 1400099 (2015)				genomic DNA	Psittacanthus schiedeanus	306	[µSat]
Psittacanthus schiedeanus	KP027835	UNKNOWN	Psittacanthus schiedeanus microsatellite Psi19 sequence.	Gonzalez,C., Harvey,N. and Ornelas,J.F.	Appl Plant Sci 3 (1), 1400099 (2015)				genomic DNA	Psittacanthus schiedeanus	301	[µSat]
Psittacanthus schiedeanus	KP027836	UNKNOWN	Psittacanthus schiedeanus microsatellite Psi7 sequence.	Gonzalez,C., Harvey,N. and Ornelas,J.F.	Appl Plant Sci 3 (1), 1400099 (2015)				genomic DNA	Psittacanthus schiedeanus	324	[µSat]
Psittacanthus schiedeanus	KP027837	UNKNOWN	Psittacanthus schiedeanus microsatellite Psi18 sequence.	Gonzalez,C., Harvey,N. and Ornelas,J.F.	Appl Plant Sci 3 (1), 1400099 (2015)				genomic DNA	Psittacanthus schiedeanus	456	[µSat]
Psittacanthus schiedeanus	KP027838	UNKNOWN	Psittacanthus schiedeanus microsatellite Psi21 sequence.	Gonzalez,C., Harvey,N. and Ornelas,J.F.	Appl Plant Sci 3 (1), 1400099 (2015)				genomic DNA	Psittacanthus schiedeanus	429	[µSat]
Psittacanthus schiedeanus	KP027839	UNKNOWN	Psittacanthus schiedeanus microsatellite Psi22 sequence.	Gonzalez,C., Harvey,N. and Ornelas,J.F.	Appl Plant Sci 3 (1), 1400099 (2015)				genomic DNA	Psittacanthus schiedeanus	145	[µSat]
Psittacanthus schiedeanus	KP027840	UNKNOWN	Psittacanthus schiedeanus microsatellite Psi24 sequence.	Gonzalez,C., Harvey,N. and Ornelas,J.F.	Appl Plant Sci 3 (1), 1400099 (2015)				genomic DNA	Psittacanthus schiedeanus	385	[µSat]
Psittacanthus schiedeanus	KP027841	UNKNOWN	Psittacanthus schiedeanus microsatellite Psi27 sequence.	Gonzalez,C., Harvey,N. and Ornelas,J.F.	Appl Plant Sci 3 (1), 1400099 (2015)				genomic DNA	Psittacanthus schiedeanus	369	[µSat]
Psittacanthus schiedeanus	KP027842	UNKNOWN	Psittacanthus schiedeanus microsatellite Psi12 sequence.	Gonzalez,C., Harvey,N. and Ornelas,J.F.	Appl Plant Sci 3 (1), 1400099 (2015)				genomic DNA	Psittacanthus schiedeanus	300	[µSat]
Scurrula atropurpurea	KC961635	A. Chaveerach 865	Scurrula atropurpurea voucher A. Chaveerach 865 PsbA (psbA) gene, partial cds; psbA-trnH intergenic spacer, complete sequence; and tRNA-His gene, partial sequence; chloroplast.	Chaveerach,A., Sudmoon,R., Noikotr,K., Kwanda,N. and Tanee,T.	Unpublished	Lorantheae	Scurrulinae	Scurrula	genomic DNA	Chloroplast	250	trnH-psbA
Scurrula atropurpurea	KF114862	UNKNOWN	Scurrula atropurpurea ribulose 1,5-bisphosphate carboxylase (rbcL) gene, partial cds; chloroplast.	Chaveerach,A., Sudmoon,R., Noikotr,K., Kwanda,N. and Tanee,T.	Unpublished	Lorantheae	Scurrulinae	Scurrula	genomic DNA	Chloroplast	561	rbcL
Scurrula chingii	AY191134	UNKNOWN	Scurrula chingii tRNA-Leu (trnL) gene, partial sequence; chloroplast gene for chloroplast product.	Han,R.L., Hao,G. and Zhang,D.X.	Unpublished	Lorantheae	Scurrulinae	Scurrula	genomic DNA	Chloroplast	302	trnL/LF
Scurrula chingii	HQ317773	LS25	Scurrula chingii voucher LS25 ribulose-1,5-bisphosphate carboxylase/oxygenase large subunit (rbcL) gene, partial cds; chloroplast.	Li,Y.-H., Chen,S.-L., Yao,H. and Luo,K.	Unpublished	Lorantheae	Scurrulinae	Scurrula	genomic DNA	Chloroplast	703	rbcL
Scurrula chingii	HQ317774	LS26	Scurrula chingii voucher LS26 ribulose-1,5-bisphosphate carboxylase/oxygenase large subunit (rbcL) gene, partial cds; chloroplast.	Li,Y.-H., Chen,S.-L., Yao,H. and Luo,K.	Unpublished	Lorantheae	Scurrulinae	Scurrula	genomic DNA	Chloroplast	703	rbcL
Scurrula chingii	HQ317814	LS25	Scurrula chingii voucher LS25 PsbA (psbA) gene, partial cds; psbA-trnH intergenic spacer, complete sequence; and tRNA-His (trnH) gene, partial sequence; chloroplast.	Li,Y.-H., Chen,S.-L., Yao,H. and Luo,K.	Unpublished	Lorantheae	Scurrulinae	Scurrula	genomic DNA	Chloroplast	245	trnH-psbA
Scurrula chingii	HQ317815	LS26	Scurrula chingii voucher LS26 PsbA (psbA) gene, partial cds; psbA-trnH intergenic spacer, complete sequence; and tRNA-His (trnH) gene, partial sequence; chloroplast.	Li,Y.-H., Chen,S.-L., Yao,H. and Luo,K.	Unpublished	Lorantheae	Scurrulinae	Scurrula	genomic DNA	Chloroplast	245	trnH-psbA
Scurrula ferruginea	DQ333827	Calvin and Wilson B02-02	Scurrula ferruginea internal transcribed spacer 1, partial sequence; 5.8S ribosomal RNA gene, complete sequence; and internal transcribed spacer 2, partial sequence.	Wilson,C.A. and Calvin,C.L.	Am. J. Bot. 93 (5), 787-796 (2006)	Lorantheae	Scurrulinae	Scurrula	genomic DNA	Nucleolus	611	ITS1; 5.8S; ITS2
Scurrula ferruginea	DQ340576	Calvin and Wilson B02-02	Scurrula ferruginea tRNA-Leu (trnL) gene and trnL-trnF intergenic spacer, partial sequence; chloroplast.	Wilson,C.A. and Calvin,C.L.	Am. J. Bot. 93 (5), 787-796 (2006)	Lorantheae	Scurrulinae	Scurrula	genomic DNA	Chloroplast	590	trnL/LF
Scurrula ferruginea	EU544343	Nickrent 4008	Scurrula ferruginea voucher Nickrent 4008 small subunit ribosomal RNA gene, partial sequence.	Vidal-Russell,R. and Nickrent,D.L.	Am. J. Bot. 95 (8), 1015-1029 (2008)	Lorantheae	Scurrulinae	Scurrula	genomic DNA	Nucleolus	1685	18S
Scurrula ferruginea	EU544395	Nickrent 4008	Scurrula ferruginea voucher Nickrent 4008 26S ribosomal RNA gene, partial sequence.	Vidal-Russell,R. and Nickrent,D.L.	Am. J. Bot. 95 (8), 1015-1029 (2008)	Lorantheae	Scurrulinae	Scurrula	genomic DNA	Nucleolus	1997	25S
Scurrula ferruginea	EU544451	Nickrent 4008	Scurrula ferruginea voucher Nickrent 4008 maturase K-like (matK) gene, partial sequence; chloroplast.	Vidal-Russell,R. and Nickrent,D.L.	Am. J. Bot. 95 (8), 1015-1029 (2008)	Lorantheae	Scurrulinae	Scurrula	genomic DNA	Chloroplast	1450	matK
Scurrula ferruginea	EU544505	Nickrent 4008	Scurrula ferruginea voucher Nickrent 4008 tRNA-Leu (trnL) gene and trnL-trnF intergenic spacer, partial sequence; chloroplast.	Vidal-Russell,R. and Nickrent,D.L.	Am. J. Bot. 95 (8), 1015-1029 (2008)	Lorantheae	Scurrulinae	Scurrula	genomic DNA	Chloroplast	549	trnL/LF
Scurrula ferruginea	KC961636	A. Chaveerach 864	Scurrula ferruginea voucher A. Chaveerach 864 PsbA (psbA) gene, partial cds; psbA-trnH intergenic spacer, complete sequence; and tRNA-His gene, partial sequence; chloroplast.	Chaveerach,A., Sudmoon,R., Noikotr,K., Kwanda,N. and Tanee,T.	Unpublished	Lorantheae	Scurrulinae	Scurrula	genomic DNA	Chloroplast	248	trnH-psbA
Scurrula ferruginea	KF114863	UNKNOWN	Scurrula ferruginea ribulose 1,5-bisphosphate carboxylase (rbcL) gene, partial cds; chloroplast.	Chaveerach,A., Sudmoon,R., Noikotr,K., Kwanda,N. and Tanee,T.	Unpublished	Lorantheae	Scurrulinae	Scurrula	genomic DNA	Chloroplast	558	rbcL
Scurrula notothixoides	AY191147	UNKNOWN	Scurrula notothixoides tRNA-Leu (trnL) gene, partial sequence; chloroplast gene for chloroplast product.	Han,R.L., Hao,G. and Zhang,D.X.	Unpublished	Lorantheae	Scurrulinae	Scurrula	genomic DNA	Chloroplast	356	trnL/LF
Scurrula parasitica	EU544345	Nickrent 4004	Scurrula parasitica voucher Nickrent 4004 small subunit ribosomal RNA gene, partial sequence.	Vidal-Russell,R. and Nickrent,D.L.	Am. J. Bot. 95 (8), 1015-1029 (2008)	Lorantheae	Scurrulinae	Scurrula	genomic DNA	Nucleolus	1594	18S
Scurrula parasitica	EU544397	Nickrent 4004	Scurrula parasitica voucher Nickrent 4004 26S ribosomal RNA gene, partial sequence.	Vidal-Russell,R. and Nickrent,D.L.	Am. J. Bot. 95 (8), 1015-1029 (2008)	Lorantheae	Scurrulinae	Scurrula	genomic DNA	Nucleolus	1480	25S
Scurrula parasitica	EU544453	Nickrent 4004	Scurrula parasitica voucher Nickrent 4004 maturase K (matK) gene, partial cds; chloroplast.	Vidal-Russell,R. and Nickrent,D.L.	Am. J. Bot. 95 (8), 1015-1029 (2008)	Lorantheae	Scurrulinae	Scurrula	genomic DNA	Chloroplast	1329	matK
Scurrula parasitica	HQ317775	LS18	Scurrula parasitica voucher LS18 ribulose-1,5-bisphosphate carboxylase/oxygenase large subunit (rbcL) gene, partial cds; chloroplast.	Li,Y.-H., Chen,S.-L., Yao,H. and Luo,K.	Unpublished	Lorantheae	Scurrulinae	Scurrula	genomic DNA	Chloroplast	703	rbcL
Scurrula parasitica	HQ317776	LS19	Scurrula parasitica voucher LS19 ribulose-1,5-bisphosphate carboxylase/oxygenase large subunit (rbcL) gene, partial cds; chloroplast.	Li,Y.-H., Chen,S.-L., Yao,H. and Luo,K.	Unpublished	Lorantheae	Scurrulinae	Scurrula	genomic DNA	Chloroplast	703	rbcL
Scurrula parasitica	HQ317777	LS57	Scurrula parasitica voucher LS57 ribulose-1,5-bisphosphate carboxylase/oxygenase large subunit (rbcL) gene, partial cds; chloroplast.	Li,Y.-H., Chen,S.-L., Yao,H. and Luo,K.	Unpublished	Lorantheae	Scurrulinae	Scurrula	genomic DNA	Chloroplast	703	rbcL
Scurrula parasitica	HQ317816	LS18	Scurrula parasitica voucher LS18 PsbA (psbA) gene, partial cds; psbA-trnH intergenic spacer, complete sequence; and tRNA-His (trnH) gene, partial sequence; chloroplast.	Li,Y.-H., Chen,S.-L., Yao,H. and Luo,K.	Unpublished	Lorantheae	Scurrulinae	Scurrula	genomic DNA	Chloroplast	213	trnH-psbA
Scurrula parasitica	HQ317817	LS19	Scurrula parasitica voucher LS19 PsbA (psbA) gene, partial cds; psbA-trnH intergenic spacer, complete sequence; and tRNA-His (trnH) gene, partial sequence; chloroplast.	Li,Y.-H., Chen,S.-L., Yao,H. and Luo,K.	Unpublished	Lorantheae	Scurrulinae	Scurrula	genomic DNA	Chloroplast	213	trnH-psbA
Scurrula parasitica	HQ317818	LS57	Scurrula parasitica voucher LS57 PsbA (psbA) gene, partial cds; psbA-trnH intergenic spacer, complete sequence; and tRNA-His (trnH) gene, partial sequence; chloroplast.	Li,Y.-H., Chen,S.-L., Yao,H. and Luo,K.	Unpublished	Lorantheae	Scurrulinae	Scurrula	genomic DNA	Chloroplast	213	trnH-psbA
Scurrula parasitica	AY191141	UNKNOWN	Scurrula parasitica var. graciliflora tRNA-Leu (trnL) gene, partial sequence; chloroplast gene for chloroplast product.	Han,R.L., Hao,G. and Zhang,D.X.	Unpublished	Lorantheae	Scurrulinae	Scurrula	genomic DNA	Chloroplast	306	trnL/LF
Scurrula parasitica	HQ317778	LS23	Scurrula parasitica var. graciliflora voucher LS23 ribulose-1,5-bisphosphate carboxylase/oxygenase large subunit (rbcL) gene, partial cds; chloroplast.	Li,Y.-H., Chen,S.-L., Yao,H. and Luo,K.	Unpublished	Lorantheae	Scurrulinae	Scurrula	genomic DNA	Chloroplast	703	rbcL
Scurrula parasitica	HQ317779	LS58	Scurrula parasitica var. graciliflora voucher LS58 ribulose-1,5-bisphosphate carboxylase/oxygenase large subunit (rbcL) gene, partial cds; chloroplast.	Li,Y.-H., Chen,S.-L., Yao,H. and Luo,K.	Unpublished	Lorantheae	Scurrulinae	Scurrula	genomic DNA	Chloroplast	703	rbcL
Scurrula parasitica	HQ317819	LS23	Scurrula parasitica var. graciliflora voucher LS23 PsbA (psbA) gene, partial cds; psbA-trnH intergenic spacer, complete sequence; and tRNA-His (trnH) gene, partial sequence; chloroplast.	Li,Y.-H., Chen,S.-L., Yao,H. and Luo,K.	Unpublished	Lorantheae	Scurrulinae	Scurrula	genomic DNA	Chloroplast	213	trnH-psbA
Scurrula parasitica	HQ317820	LS58	Scurrula parasitica var. graciliflora voucher LS58 PsbA (psbA) gene, partial cds; psbA-trnH intergenic spacer, complete sequence; and tRNA-His (trnH) gene, partial sequence; chloroplast.	Li,Y.-H., Chen,S.-L., Yao,H. and Luo,K.	Unpublished	Lorantheae	Scurrulinae	Scurrula	genomic DNA	Chloroplast	213	trnH-psbA
Scurrula parasitica	AY191138	UNKNOWN	Scurrula parasitica var. parasitica tRNA-Leu (trnL) gene, partial sequence; chloroplast gene for chloroplast product.	Han,R.L., Hao,G. and Zhang,D.X.	Unpublished	Lorantheae	Scurrulinae	Scurrula	genomic DNA	Chloroplast	304	trnL/LF
Scurrula pulverulenta	EU544344	Nickrent 4159	Scurrula pulverulenta voucher Nickrent 4159 small subunit ribosomal RNA gene, partial sequence.	Vidal-Russell,R. and Nickrent,D.L.	Am. J. Bot. 95 (8), 1015-1029 (2008)	Lorantheae	Scurrulinae	Scurrula	genomic DNA	Nucleolus	1711	18S
Scurrula pulverulenta	EU544396	Nickrent 4159	Scurrula pulverulenta voucher Nickrent 4159 26S ribosomal RNA gene, partial sequence.	Vidal-Russell,R. and Nickrent,D.L.	Am. J. Bot. 95 (8), 1015-1029 (2008)	Lorantheae	Scurrulinae	Scurrula	genomic DNA	Nucleolus	1489	25S
Scurrula pulverulenta	EU544452	Nickrent 4159	Scurrula pulverulenta voucher Nickrent 4159 maturase K (matK) gene, partial cds; chloroplast.	Vidal-Russell,R. and Nickrent,D.L.	Am. J. Bot. 95 (8), 1015-1029 (2008)	Lorantheae	Scurrulinae	Scurrula	genomic DNA	Chloroplast	1335	matK
Scurrula sootepensis	AY191139	UNKNOWN	Scurrula sootepensis tRNA-Leu (trnL) gene, partial sequence; chloroplast gene for chloroplast product.	Han,R.L., Hao,G. and Zhang,D.X.	Unpublished	Lorantheae	Scurrulinae	Scurrula	genomic DNA	Chloroplast	309	trnL/LF
Scurrula sp.	JQ933474	M.F. Watson et al., 20812115, (E)	Scurrula sp. CHSL-2012 ribulose-1,5-bisphosphate carboxylase/oxygenase large subunit (rbcL) gene, partial cds; plastid.	Saslis-Lagoudakis,C.H., Savolainen,V., Williamson,E.M., Forest,F.,	Proc. Natl. Acad. Sci. U.S.A. 109 (39), 15835-15840 (2012)	Lorantheae	Scurrulinae	Scurrula	genomic DNA	Chloroplast	672	rbcL
Scurrula sp.	AY191146	Han 02-C10	Scurrula sp. Han 02-C10 tRNA-Leu (trnL) gene, partial sequence; chloroplast gene for chloroplast product.	Han,R.L., Hao,G. and Zhang,D.X.	Unpublished	Lorantheae	Scurrulinae	Scurrula	genomic DNA	Chloroplast	354	trnL/LF
Septulina glauca	AM235022	Manning J.C. 2925 (NBG)	Septulina glauca chloroplast partial rbcL gene for ribulose bisphosphate carboxylase large subunit, specimen voucher Manning J.C. 2925 (NBG).	Forest,F., Grenyer,R., Rouget,M., Davies,T.J., Cowling,R.M.,	Nature 445 (7129), 757-760 (2007)	Lorantheae	Tapinanthinae	Septulina	genomic DNA	Chloroplast	1399	rbcL
Septulina glauca	EU544346	Nickrent 4089	Septulina glauca voucher Nickrent 4089 small subunit ribosomal RNA gene, partial sequence.	Vidal-Russell,R. and Nickrent,D.L.	Am. J. Bot. 95 (8), 1015-1029 (2008)	Lorantheae	Tapinanthinae	Septulina	genomic DNA	Nucleolus	1778	18S
Septulina glauca	EU544398	Nickrent 4089	Septulina glauca voucher Nickrent 4089 26S ribosomal RNA gene, partial sequence.	Vidal-Russell,R. and Nickrent,D.L.	Am. J. Bot. 95 (8), 1015-1029 (2008)	Lorantheae	Tapinanthinae	Septulina	genomic DNA	Nucleolus	2081	25S
Septulina glauca	EU544506	Nickrent 4089	Septulina glauca voucher Nickrent 4089 tRNA-Leu (trnL) gene, partial sequence; trnL-trnF intergenic spacer, complete sequence; and tRNA-Phe (trnF) gene, partial sequence; chloroplast.	Vidal-Russell,R. and Nickrent,D.L.	Am. J. Bot. 95 (8), 1015-1029 (2008)	Lorantheae	Tapinanthinae	Septulina	genomic DNA	Chloroplast	620	trnL/LF
Socratina bemarivensis	EU544347	Nickrent 4179	Socratina bemarivensis voucher Nickrent 4179 small subunit ribosomal RNA gene, partial sequence.	Vidal-Russell,R. and Nickrent,D.L.	Am. J. Bot. 95 (8), 1015-1029 (2008)	Lorantheae	Tapinanthinae	Socratina	genomic DNA	Nucleolus	1669	18S
Socratina bemarivensis	EU544399	Nickrent 4179	Socratina bemarivensis voucher Nickrent 4179 26S ribosomal RNA gene, partial sequence.	Vidal-Russell,R. and Nickrent,D.L.	Am. J. Bot. 95 (8), 1015-1029 (2008)	Lorantheae	Tapinanthinae	Socratina	genomic DNA	Nucleolus	1747	25S
Socratina bemarivensis	EU544454	Nickrent 4279	Socratina bemarivensis voucher Nickrent 4279 maturase K (matK) gene, partial cds; chloroplast.	Vidal-Russell,R. and Nickrent,D.L.	Am. J. Bot. 95 (8), 1015-1029 (2008)	Lorantheae	Tapinanthinae	Socratina	genomic DNA	Chloroplast	1344	matK
Socratina bemarivensis	EU544507	Nickrent 4179	Socratina bemarivensis voucher Nickrent 4179 tRNA-Leu (trnL) gene and trnL-trnF intergenic spacer, partial sequence; chloroplast.	Vidal-Russell,R. and Nickrent,D.L.	Am. J. Bot. 95 (8), 1015-1029 (2008)	Lorantheae	Tapinanthinae	Socratina	genomic DNA	Chloroplast	572	trnL/LF
Sogerianthe sessiflora	EU544348	Nickrent 4467	Sogerianthe sessiflora voucher Nickrent 4467 small subunit ribosomal RNA gene, partial sequence.	Vidal-Russell,R. and Nickrent,D.L.	Am. J. Bot. 95 (8), 1015-1029 (2008)	Lorantheae	Amyeminae	Sogerianthe	genomic DNA	Nucleolus	1700	18S
Sogerianthe sessiflora	EU544400	Nickrent 4467	Sogerianthe sessiflora voucher Nickrent 4467 26S ribosomal RNA gene, partial sequence.	Vidal-Russell,R. and Nickrent,D.L.	Am. J. Bot. 95 (8), 1015-1029 (2008)	Lorantheae	Amyeminae	Sogerianthe	genomic DNA	Nucleolus	2099	25S
Sogerianthe sessiflora	EU544455	Nickrent 4467	Sogerianthe sessiflora voucher Nickrent 4467 maturase K (matK) gene, partial cds; chloroplast.	Vidal-Russell,R. and Nickrent,D.L.	Am. J. Bot. 95 (8), 1015-1029 (2008)	Lorantheae	Amyeminae	Sogerianthe	genomic DNA	Chloroplast	1367	matK
Sogerianthe sessiflora	EU544508	Nickrent 4467	Sogerianthe sessiflora voucher Nickrent 4467 tRNA-Leu (trnL) gene, partial sequence; trnL-trnF intergenic spacer, complete sequence; and tRNA-Phe (trnF) gene, partial sequence; chloroplast.	Vidal-Russell,R. and Nickrent,D.L.	Am. J. Bot. 95 (8), 1015-1029 (2008)	Lorantheae	Amyeminae	Sogerianthe	genomic DNA	Chloroplast	587	trnL/LF
Spragueanella rhamnifolia	EU544401	Nickrent 4674	Spragueanella rhamnifolia voucher Nickrent 4674 26S ribosomal RNA gene, partial sequence.	Vidal-Russell,R. and Nickrent,D.L.	Am. J. Bot. 95 (8), 1015-1029 (2008)	Lorantheae	Emelianthinae	Spragueanella	genomic DNA	Nucleolus	1381	25S
Spragueanella rhamnifolia	EU544456	Nickrent 4674	Spragueanella rhamnifolia voucher Nickrent 4674 maturase K-like (matK) gene, partial sequence; chloroplast.	Vidal-Russell,R. and Nickrent,D.L.	Am. J. Bot. 95 (8), 1015-1029 (2008)	Lorantheae	Emelianthinae	Spragueanella	genomic DNA	Chloroplast	1390	matK
Struthanthus oerstedii	L24421	UNKNOWN	Struthanthus oerstedii (Oliv.) Standl. and Calderon 18S ribosomal RNA gene, partial sequence.	Nickrent,D.L. and Duff,R.J.	(in) Moreno,M.T., Cubero,J.I., Berner,D., Joel,D., Musselman,L.J.	Psittacantheae	Psittacanthinae	Struthanthus	genomic DNA	Nucleolus	1735	18S
Struthanthus oerstedii	EU544402	Nickrent 2728	Struthanthus oerstedii voucher Nickrent 2728 26S ribosomal RNA gene, partial sequence.	Vidal-Russell,R. and Nickrent,D.L.	Am. J. Bot. 95 (8), 1015-1029 (2008)	Psittacantheae	Psittacanthinae	Struthanthus	genomic DNA	Nucleolus	2096	25S
Struthanthus oerstedii	EU544457	Nickrent 2728	Struthanthus oerstedii voucher Nickrent 2728 maturase K (matK) gene, partial cds; chloroplast.	Vidal-Russell,R. and Nickrent,D.L.	Am. J. Bot. 95 (8), 1015-1029 (2008)	Psittacantheae	Psittacanthinae	Struthanthus	genomic DNA	Chloroplast	1337	matK
Struthanthus oerstedii	EU544509	Nickrent 2728	Struthanthus oerstedii voucher Nickrent 2728 tRNA-Leu (trnL) gene, partial sequence; trnL-trnF intergenic spacer, complete sequence; and tRNA-Phe (trnF) gene, partial sequence; chloroplast.	Vidal-Russell,R. and Nickrent,D.L.	Am. J. Bot. 95 (8), 1015-1029 (2008)	Psittacantheae	Psittacanthinae	Struthanthus	genomic DNA	Chloroplast	677	trnL/LF
Struthanthus orbicularis	DQ333856	Calvin and Wilson CR01-02	Struthanthus orbicularis internal transcribed spacer 1, partial sequence; 5.8S ribosomal RNA gene, complete sequence; and internal transcribed spacer 2, partial sequence.	Wilson,C.A. and Calvin,C.L.	Am. J. Bot. 93 (5), 787-796 (2006)	Psittacantheae	Psittacanthinae	Struthanthus	genomic DNA	Nucleolus	667	ITS1; 5.8S; ITS2
Struthanthus orbicularis	DQ340607	Calvin and Wilson CR01-02	Struthanthus orbicularis tRNA-Leu (trnL) gene and trnL-trnF intergenic spacer, partial sequence; chloroplast.	Wilson,C.A. and Calvin,C.L.	Am. J. Bot. 93 (5), 787-796 (2006)	Psittacantheae	Psittacanthinae	Struthanthus	genomic DNA	Chloroplast	643	trnL/LF
Struthanthus orbicularis	JQ589640	RE-5125-1	Struthanthus orbicularis voucher RE-5125-1 maturase K (matK) gene, partial cds; chloroplast.	International Barcode of Life (iBOL)	Unpublished	Psittacantheae	Psittacanthinae	Struthanthus	genomic DNA	Chloroplast	653	matK
Struthanthus orbicularis	JQ592413	BioBot05045	Struthanthus orbicularis voucher BioBot05045 ribulose-1,5-bisphosphate carboxylase/oxygenase large subunit (rbcL) gene, partial cds; chloroplast.	International Barcode of Life (iBOL)	Unpublished	Psittacantheae	Psittacanthinae	Struthanthus	genomic DNA	Chloroplast	552	rbcL
Struthanthus orbicularis	JQ592414	BioBot05046	Struthanthus orbicularis voucher BioBot05046 ribulose-1,5-bisphosphate carboxylase/oxygenase large subunit (rbcL) gene, partial cds; chloroplast.	International Barcode of Life (iBOL)	Unpublished	Psittacantheae	Psittacanthinae	Struthanthus	genomic DNA	Chloroplast	552	rbcL
Struthanthus orbicularis	JQ592415	BioBot05048	Struthanthus orbicularis voucher BioBot05048 ribulose-1,5-bisphosphate carboxylase/oxygenase large subunit (rbcL) gene, partial cds; chloroplast.	International Barcode of Life (iBOL)	Unpublished	Psittacantheae	Psittacanthinae	Struthanthus	genomic DNA	Chloroplast	552	rbcL
Struthanthus orbicularis	JQ594621	RE-5125-1	Struthanthus orbicularis voucher RE-5125-1 ribulose-1,5-bisphosphate carboxylase/oxygenase large subunit (rbcL) gene, partial cds; chloroplast.	International Barcode of Life (iBOL)	Unpublished	Psittacantheae	Psittacanthinae	Struthanthus	genomic DNA	Chloroplast	553	rbcL
Struthanthus sp.	JQ589641	RE-5128-1	Struthanthus sp. MHPAA293-08 voucher RE-5128-1 maturase K (matK) gene, partial cds; chloroplast.	International Barcode of Life (iBOL)	Unpublished	Psittacantheae	Psittacanthinae	Struthanthus	genomic DNA	Chloroplast	643	matK
Struthanthus sp.	JQ594622	RE-5128-1	Struthanthus sp. MHPAA293-08 voucher RE-5128-1 ribulose-1,5-bisphosphate carboxylase/oxygenase large subunit (rbcL) gene, partial cds; chloroplast.	International Barcode of Life (iBOL)	Unpublished	Psittacantheae	Psittacanthinae	Struthanthus	genomic DNA	Chloroplast	563	rbcL
Struthanthus woodsonii	EU544349	Nickrent 2761	Struthanthus woodsonii voucher Nickrent 2761 small subunit ribosomal RNA gene, partial sequence.	Vidal-Russell,R. and Nickrent,D.L.	Am. J. Bot. 95 (8), 1015-1029 (2008)	Psittacantheae	Psittacanthinae	Struthanthus	genomic DNA	Nucleolus	1696	18S
Struthanthus woodsonii	EU544403	Nickrent 2761	Struthanthus woodsonii voucher Nickrent 2761 26S ribosomal RNA gene, partial sequence.	Vidal-Russell,R. and Nickrent,D.L.	Am. J. Bot. 95 (8), 1015-1029 (2008)	Psittacantheae	Psittacanthinae	Struthanthus	genomic DNA	Nucleolus	2036	25S
Struthanthus woodsonii	EU544458	Nickrent 2761	Struthanthus woodsonii voucher Nickrent 2761 maturase K (matK) gene, partial cds; chloroplast.	Vidal-Russell,R. and Nickrent,D.L.	Am. J. Bot. 95 (8), 1015-1029 (2008)	Psittacantheae	Psittacanthinae	Struthanthus	genomic DNA	Chloroplast	1134	matK
Struthanthus woodsonii	EU544474	Nickrent 2761	Struthanthus woodsonii voucher Nickrent 2761 ribulose-1,5-bisphosphate carboxylase/oxygenase large subunit (rbcL) gene, partial cds; chloroplast.	Vidal-Russell,R. and Nickrent,D.L.	Unpublished	Psittacantheae	Psittacanthinae	Struthanthus	genomic DNA	Chloroplast	837	rbcL
Struthanthus woodsonii	EU544510	Nickrent 2761	Struthanthus woodsonii voucher Nickrent 2761 tRNA-Leu (trnL) gene, partial sequence; trnL-trnF intergenic spacer, complete sequence; and tRNA-Phe (trnF) gene, partial sequence; chloroplast.	Vidal-Russell,R. and Nickrent,D.L.	Am. J. Bot. 95 (8), 1015-1029 (2008)	Psittacantheae	Psittacanthinae	Struthanthus	genomic DNA	Chloroplast	586	trnL/LF
Tapinanthus constrictiflorus	EU544404	Nickrent 3088	Tapinanthus constrictiflorus voucher Nickrent 3088 26S ribosomal RNA gene, partial sequence.	Vidal-Russell,R. and Nickrent,D.L.	Am. J. Bot. 95 (8), 1015-1029 (2008)	Lorantheae	Tapinanthinae	Tapinanthus	genomic DNA	Nucleolus	2034	25S
Tapinanthus constrictiflorus	EU544459	Nickrent 3088	Tapinanthus constrictiflorus voucher Nickrent 3088 maturase K (matK) gene, partial cds; chloroplast.	Vidal-Russell,R. and Nickrent,D.L.	Am. J. Bot. 95 (8), 1015-1029 (2008)	Lorantheae	Tapinanthinae	Tapinanthus	genomic DNA	Chloroplast	1424	matK
Tapinanthus constrictiflorus	EU544511	Nickrent 3088	Tapinanthus constrictiflorus voucher Nickrent 3088 tRNA-Leu (trnL) gene, partial sequence; trnL-trnF intergenic spacer, complete sequence; and tRNA-Phe (trnF) gene, partial sequence; chloroplast.	Vidal-Russell,R. and Nickrent,D.L.	Am. J. Bot. 95 (8), 1015-1029 (2008)	Lorantheae	Tapinanthinae	Tapinanthus	genomic DNA	Chloroplast	627	trnL/LF
Tapinanthus quinquangulus	L24422	UNKNOWN	Tapinanthus quinquangulus (Engl. and Schinz) Danser 18S ribosomal RNA gene, partial sequence.	Nickrent,D.L. and Duff,R.J.	(in) Moreno,M.T., Cubero,J.I., Berner,D., Joel,D., Musselman,L.J.	Lorantheae	Tapinanthinae	Tapinanthus	genomic DNA	Nucleolus	1751	18S
Tapinanthus sp.	EU254407	OM825	Tapinanthus sp. OM 825 NADH dehydrogenase subunit J (ndhJ) gene, partial cds; chloroplast.	Lahaye,R., van der Bank,M., Bogarin,D., Warner,J., Pupulin,F.,	Proc. Natl. Acad. Sci. U.S.A. 105 (8), 2923-2928 (2008)	Lorantheae	Tapinanthinae	Tapinanthus	genomic DNA	Chloroplast	339	ndhJ
Tapinanthus sp.	EU214301	OM825	Tapinanthus sp. OM 825 maturase K-like (matK) gene, partial sequence; chloroplast.	Lahaye,R., van der Bank,M., Bogarin,D., Warner,J., Pupulin,F.,	Proc. Natl. Acad. Sci. U.S.A. 105 (8), 2923-2928 (2008)	Lorantheae	Tapinanthinae	Tapinanthus	genomic DNA	Chloroplast	675	matK
Tapinanthus sp.	EU214131	OM825	Tapinanthus sp. OM 825 Ycf5-like (Ycf5) gene, partial sequence; chloroplast.	Lahaye,R., van der Bank,M., Bogarin,D., Warner,J., Pupulin,F.,	Proc. Natl. Acad. Sci. U.S.A. 105 (8), 2923-2928 (2008)	Lorantheae	Tapinanthinae	Tapinanthus	genomic DNA	Chloroplast	212	ycf5
Tapinanthus sp.	EU214037	OM825	Tapinanthus sp. OM 825 RNA polymerase C (rpoC1) gene, partial cds; chloroplast.	Lahaye,R., van der Bank,M., Bogarin,D., Warner,J., Pupulin,F.,	Proc. Natl. Acad. Sci. U.S.A. 105 (8), 2923-2928 (2008)	Lorantheae	Tapinanthinae	Tapinanthus	genomic DNA	Chloroplast	481	rpoC1
Tapinanthus sp.	EU213700	OM825	Tapinanthus sp. OM 825 RNA polymerase beta subunit (rpoB) gene, partial cds.	Lahaye,R., van der Bank,M., Bogarin,D., Warner,J., Pupulin,F.,	Proc. Natl. Acad. Sci. U.S.A. 105 (8), 2923-2928 (2008)	Lorantheae	Tapinanthinae	Tapinanthus	genomic DNA	Nucleolus	354	rpoB
Tapinanthus sp.	EU213529	OM825	Tapinanthus sp. OM 825 ribulose-1,5-bisphosphate carboxylase/oxygenase large subunit (rbcL) gene, partial cds; chloroplast.	Lahaye,R., van der Bank,M., Bogarin,D., Warner,J., Pupulin,F.,	Proc. Natl. Acad. Sci. U.S.A. 105 (8), 2923-2928 (2008)	Lorantheae	Tapinanthinae	Tapinanthus	genomic DNA	Chloroplast	689	rbcL
Tapinanthus sp.	EU213431	OM825	Tapinanthus sp. OM 825 acetyl-CoA carboxylase-D (accD) gene, partial cds; chloroplast.	Lahaye,R., van der Bank,M., Bogarin,D., Warner,J., Pupulin,F.,	Proc. Natl. Acad. Sci. U.S.A. 105 (8), 2923-2928 (2008)	Lorantheae	Tapinanthinae	Tapinanthus	genomic DNA	Chloroplast	189	accD
Tapinanthus sp.	EU626984	OM825	Tapinanthus sp. OM 825 psbK-psbI intergenic spacer, partial sequence.	Lahaye,R., Savolainen,V., Duthoit,S., Maurin,O. and van der Bank,M.	Unpublished	Lorantheae	Tapinanthinae	Tapinanthus	genomic DNA	Nucleolus	342	psbK-psbI
Tapinanthus sp.	EU626885	OM825	Tapinanthus sp. OM 825 atpF-atpH intergenic spacer, partial sequence; chloroplast.	Lahaye,R., Savolainen,V., Duthoit,S., Maurin,O. and van der Bank,M.	Unpublished	Lorantheae	Tapinanthinae	Tapinanthus	genomic DNA	Chloroplast	504	atpF-atpH
Tapinanthus sp.	DQ110160	Smith 1850 US	Tapinanthus sp. Smith 1850 F1-ATPase alpha subunit (atp1) gene, partial cds; mitochondrial.	Davis,C.C., Anderson,W.R. and Wurdack,K.J.	Proc. Biol. Sci. 272 (1578), 2237-2242 (2005)	Lorantheae	Tapinanthinae	Tapinanthus	genomic DNA	Mitochondrion	998	atp1
Tapinanthus sp.	DQ110290	Smith 1850, US	Tapinanthus sp. Smith 1850 NADH dehydrogenase subunit 1 (NADH1) gene, partial sequence; mitochondrial.	Davis,C.C., Anderson,W.R. and Wurdack,K.J.	Proc. Biol. Sci. 272 (1578), 2237-2242 (2005)	Lorantheae	Tapinanthinae	Tapinanthus	genomic DNA	Mitochondrion	1664	nad1
Tapinanthus sp.	DQ110361	Smith 1850 US	Tapinanthus sp. Smith 1850 maturase (matR) gene, partial cds; mitochondrial.	Davis,C.C., Anderson,W.R. and Wurdack,K.J.	Proc. Biol. Sci. 272 (1578), 2237-2242 (2005)	Lorantheae	Tapinanthinae	Tapinanthus	genomic DNA	Mitochondrion	1786	matR
Taxillus chinensis	AY191143	UNKNOWN	Taxillus chinensis tRNA-Leu (trnL) gene, partial sequence; chloroplast gene for chloroplast product.	Han,R.L., Hao,G. and Zhang,D.X.	Unpublished	Lorantheae	Scurrulinae	Taxillus	genomic DNA	Chloroplast	309	trnL/LF
Taxillus chinensis	EU544350	Nickrent 4032	Taxillus chinensis voucher Nickrent 4032 small subunit ribosomal RNA gene, partial sequence.	Vidal-Russell,R. and Nickrent,D.L.	Am. J. Bot. 95 (8), 1015-1029 (2008)	Lorantheae	Scurrulinae	Taxillus	genomic DNA	Nucleolus	1780	18S
Taxillus chinensis	EU544405	Nickrent 4032	Taxillus chinensis voucher Nickrent 4032 26S ribosomal RNA gene, partial sequence.	Vidal-Russell,R. and Nickrent,D.L.	Am. J. Bot. 95 (8), 1015-1029 (2008)	Lorantheae	Scurrulinae	Taxillus	genomic DNA	Nucleolus	1967	25S
Taxillus chinensis	EU544460	Nickrent 4032	Taxillus chinensis voucher Nickrent 4032 maturase K (matK) gene, partial cds; chloroplast.	Vidal-Russell,R. and Nickrent,D.L.	Am. J. Bot. 95 (8), 1015-1029 (2008)	Lorantheae	Scurrulinae	Taxillus	genomic DNA	Chloroplast	1374	matK
Taxillus chinensis	EU544512	Nickrent 4032	Taxillus chinensis voucher Nickrent 4032 tRNA-Leu (trnL) gene, partial sequence; trnL-trnF intergenic spacer, complete sequence; and tRNA-Phe (trnF) gene, partial sequence; chloroplast.	Vidal-Russell,R. and Nickrent,D.L.	Am. J. Bot. 95 (8), 1015-1029 (2008)	Lorantheae	Scurrulinae	Taxillus	genomic DNA	Chloroplast	579	trnL/LF
Taxillus chinensis	GQ435467	PS1685MT01	Taxillus chinensis voucher PS1685MT01 psbA-trnH intergenic spacer, complete sequence; chloroplast.	Chen,S., Yao,H., Han,J., Liu,C., Song,J., Shi,L., Zhu,Y., Ma,X.,	PLoS ONE 5 (1), E8613 (2010)	Lorantheae	Scurrulinae	Taxillus	genomic DNA	Chloroplast	201	trnH-psbA
Taxillus chinensis	GQ435851	PS1685MT01	Taxillus chinensis voucher PS1685MT01 Ycf5 (ycf5) gene, partial cds; chloroplast.	Chen,S., Yao,H., Han,J., Liu,C., Song,J., Shi,L., Zhu,Y., Ma,X.,	PLoS ONE 5 (1), E8613 (2010)	Lorantheae	Scurrulinae	Taxillus	genomic DNA	Chloroplast	376	ycf5
Taxillus chinensis	HQ317780	LS03	Taxillus chinensis voucher LS03 ribulose-1,5-bisphosphate carboxylase/oxygenase large subunit (rbcL) gene, partial cds; chloroplast.	Li,Y.-H., Chen,S.-L., Yao,H. and Luo,K.	Unpublished	Lorantheae	Scurrulinae	Taxillus	genomic DNA	Chloroplast	703	rbcL
Taxillus chinensis	HQ317781	LS04	Taxillus chinensis voucher LS04 ribulose-1,5-bisphosphate carboxylase/oxygenase large subunit (rbcL) gene, partial cds; chloroplast.	Li,Y.-H., Chen,S.-L., Yao,H. and Luo,K.	Unpublished	Lorantheae	Scurrulinae	Taxillus	genomic DNA	Chloroplast	703	rbcL
Taxillus chinensis	HQ317782	LS06	Taxillus chinensis voucher LS06 ribulose-1,5-bisphosphate carboxylase/oxygenase large subunit (rbcL) gene, partial cds; chloroplast.	Li,Y.-H., Chen,S.-L., Yao,H. and Luo,K.	Unpublished	Lorantheae	Scurrulinae	Taxillus	genomic DNA	Chloroplast	703	rbcL
Taxillus chinensis	HQ317783	LS07	Taxillus chinensis voucher LS07 ribulose-1,5-bisphosphate carboxylase/oxygenase large subunit (rbcL) gene, partial cds; chloroplast.	Li,Y.-H., Chen,S.-L., Yao,H. and Luo,K.	Unpublished	Lorantheae	Scurrulinae	Taxillus	genomic DNA	Chloroplast	703	rbcL
Taxillus chinensis	HQ317784	LS08	Taxillus chinensis voucher LS08 ribulose-1,5-bisphosphate carboxylase/oxygenase large subunit (rbcL) gene, partial cds; chloroplast.	Li,Y.-H., Chen,S.-L., Yao,H. and Luo,K.	Unpublished	Lorantheae	Scurrulinae	Taxillus	genomic DNA	Chloroplast	703	rbcL
Taxillus chinensis	HQ317785	LS09	Taxillus chinensis voucher LS09 ribulose-1,5-bisphosphate carboxylase/oxygenase large subunit (rbcL) gene, partial cds; chloroplast.	Li,Y.-H., Chen,S.-L., Yao,H. and Luo,K.	Unpublished	Lorantheae	Scurrulinae	Taxillus	genomic DNA	Chloroplast	703	rbcL
Taxillus chinensis	HQ317786	LS52	Taxillus chinensis voucher LS52 ribulose-1,5-bisphosphate carboxylase/oxygenase large subunit (rbcL) gene, partial cds; chloroplast.	Li,Y.-H., Chen,S.-L., Yao,H. and Luo,K.	Unpublished	Lorantheae	Scurrulinae	Taxillus	genomic DNA	Chloroplast	703	rbcL
Taxillus chinensis	HQ317787	LS53	Taxillus chinensis voucher LS53 ribulose-1,5-bisphosphate carboxylase/oxygenase large subunit (rbcL) gene, partial cds; chloroplast.	Li,Y.-H., Chen,S.-L., Yao,H. and Luo,K.	Unpublished	Lorantheae	Scurrulinae	Taxillus	genomic DNA	Chloroplast	703	rbcL
Taxillus chinensis	HQ317788	LS54	Taxillus chinensis voucher LS54 ribulose-1,5-bisphosphate carboxylase/oxygenase large subunit (rbcL) gene, partial cds; chloroplast.	Li,Y.-H., Chen,S.-L., Yao,H. and Luo,K.	Unpublished	Lorantheae	Scurrulinae	Taxillus	genomic DNA	Chloroplast	703	rbcL
Taxillus chinensis	HQ317789	LS55	Taxillus chinensis voucher LS55 ribulose-1,5-bisphosphate carboxylase/oxygenase large subunit (rbcL) gene, partial cds; chloroplast.	Li,Y.-H., Chen,S.-L., Yao,H. and Luo,K.	Unpublished	Lorantheae	Scurrulinae	Taxillus	genomic DNA	Chloroplast	703	rbcL
Taxillus chinensis	HQ317790	LS56	Taxillus chinensis voucher LS56 ribulose-1,5-bisphosphate carboxylase/oxygenase large subunit (rbcL) gene, partial cds; chloroplast.	Li,Y.-H., Chen,S.-L., Yao,H. and Luo,K.	Unpublished	Lorantheae	Scurrulinae	Taxillus	genomic DNA	Chloroplast	703	rbcL
Taxillus chinensis	HQ317821	LS03	Taxillus chinensis voucher LS03 PsbA (psbA) gene, partial cds; psbA-trnH intergenic spacer, complete sequence; and tRNA-His (trnH) gene, partial sequence; chloroplast.	Li,Y.-H., Chen,S.-L., Yao,H. and Luo,K.	Unpublished	Lorantheae	Scurrulinae	Taxillus	genomic DNA	Chloroplast	238	trnH-psbA
Taxillus chinensis	HQ317822	LS04	Taxillus chinensis voucher LS04 PsbA (psbA) gene, partial cds; psbA-trnH intergenic spacer, complete sequence; and tRNA-His (trnH) gene, partial sequence; chloroplast.	Li,Y.-H., Chen,S.-L., Yao,H. and Luo,K.	Unpublished	Lorantheae	Scurrulinae	Taxillus	genomic DNA	Chloroplast	238	trnH-psbA
Taxillus chinensis	HQ317823	LS06	Taxillus chinensis voucher LS06 PsbA (psbA) gene, partial cds; psbA-trnH intergenic spacer, complete sequence; and tRNA-His (trnH) gene, partial sequence; chloroplast.	Li,Y.-H., Chen,S.-L., Yao,H. and Luo,K.	Unpublished	Lorantheae	Scurrulinae	Taxillus	genomic DNA	Chloroplast	238	trnH-psbA
Taxillus chinensis	HQ317824	LS07	Taxillus chinensis voucher LS07 PsbA (psbA) gene, partial cds; psbA-trnH intergenic spacer, complete sequence; and tRNA-His (trnH) gene, partial sequence; chloroplast.	Li,Y.-H., Chen,S.-L., Yao,H. and Luo,K.	Unpublished	Lorantheae	Scurrulinae	Taxillus	genomic DNA	Chloroplast	238	trnH-psbA
Taxillus chinensis	HQ317825	LS08	Taxillus chinensis voucher LS08 PsbA (psbA) gene, partial cds; psbA-trnH intergenic spacer, complete sequence; and tRNA-His (trnH) gene, partial sequence; chloroplast.	Li,Y.-H., Chen,S.-L., Yao,H. and Luo,K.	Unpublished	Lorantheae	Scurrulinae	Taxillus	genomic DNA	Chloroplast	238	trnH-psbA
Taxillus chinensis	HQ317826	LS09	Taxillus chinensis voucher LS09 PsbA (psbA) gene, partial cds; psbA-trnH intergenic spacer, complete sequence; and tRNA-His (trnH) gene, partial sequence; chloroplast.	Li,Y.-H., Chen,S.-L., Yao,H. and Luo,K.	Unpublished	Lorantheae	Scurrulinae	Taxillus	genomic DNA	Chloroplast	238	trnH-psbA
Taxillus chinensis	HQ317827	LS52	Taxillus chinensis voucher LS52 PsbA (psbA) gene, partial cds; psbA-trnH intergenic spacer, complete sequence; and tRNA-His (trnH) gene, partial sequence; chloroplast.	Li,Y.-H., Chen,S.-L., Yao,H. and Luo,K.	Unpublished	Lorantheae	Scurrulinae	Taxillus	genomic DNA	Chloroplast	238	trnH-psbA
Taxillus chinensis	HQ317828	LS53	Taxillus chinensis voucher LS53 PsbA (psbA) gene, partial cds; psbA-trnH intergenic spacer, complete sequence; and tRNA-His (trnH) gene, partial sequence; chloroplast.	Li,Y.-H., Chen,S.-L., Yao,H. and Luo,K.	Unpublished	Lorantheae	Scurrulinae	Taxillus	genomic DNA	Chloroplast	238	trnH-psbA
Taxillus chinensis	HQ317829	LS54	Taxillus chinensis voucher LS54 PsbA (psbA) gene, partial cds; psbA-trnH intergenic spacer, complete sequence; and tRNA-His (trnH) gene, partial sequence; chloroplast.	Li,Y.-H., Chen,S.-L., Yao,H. and Luo,K.	Unpublished	Lorantheae	Scurrulinae	Taxillus	genomic DNA	Chloroplast	218	trnH-psbA
Taxillus chinensis	HQ317830	LS55	Taxillus chinensis voucher LS55 PsbA (psbA) gene, partial cds; psbA-trnH intergenic spacer, complete sequence; and tRNA-His (trnH) gene, partial sequence; chloroplast.	Li,Y.-H., Chen,S.-L., Yao,H. and Luo,K.	Unpublished	Lorantheae	Scurrulinae	Taxillus	genomic DNA	Chloroplast	231	trnH-psbA
Taxillus chinensis	HQ317831	LS56	Taxillus chinensis voucher LS56 PsbA (psbA) gene, partial cds; psbA-trnH intergenic spacer, complete sequence; and tRNA-His (trnH) gene, partial sequence; chloroplast.	Li,Y.-H., Chen,S.-L., Yao,H. and Luo,K.	Unpublished	Lorantheae	Scurrulinae	Taxillus	genomic DNA	Chloroplast	238	trnH-psbA
Taxillus chinensis	JN687576	A. Chveerach_P4	Taxillus chinensis psbA-trnH intergenic spacer, partial sequence; chloroplast.	Kwanda,N., Noikotr,K., Sudmoon,R., Tanee,T. and Chaveerach,A.	J Nat Med (2012) In press	Lorantheae	Scurrulinae	Taxillus	genomic DNA	Chloroplast	230	trnH-psbA
Taxillus chinensis	JN687568	A. Chveerach_P4	Taxillus chinensis ribulose-1,5-bisphosphate carboxylase/oxygenase large subunit (rbcL) gene, partial cds; chloroplast.	Kwanda,N., Noikotr,K., Sudmoon,R., Tanee,T. and Chaveerach,A.	J Nat Med (2012) In press	Lorantheae	Scurrulinae	Taxillus	genomic DNA	Chloroplast	512	rbcL
Taxillus chinensis	JF949992	P6909	Taxillus chinensis voucher P6909 ribulose-1,5-bisphosphate carboxylase/oxygenase large subunit (rbcL) gene, partial cds; chloroplast.	Herrmann,F., Romero,M.R., Blazquez,A.G., Kaufmann,D., Ashour,M.L.,	Diversity (Basel) 3, 547-580 (2011)	Lorantheae	Scurrulinae	Taxillus	genomic DNA	Chloroplast	679	rbcL
Taxillus chinensis	JX177497	UNKNOWN	Taxillus chinensis 18S ribosomal RNA gene, partial sequence; internal transcribed spacer 1, 5.8S ribosomal RNA gene, and internal transcribed spacer 2, complete sequence; and 28S ribosomal RNA gene, partial sequence.	Lee,I.-J.	Submitted (14-JUN-2012) Herbarium, National Research Institute of	Lorantheae	Scurrulinae	Taxillus	genomic DNA	Nucleolus	748	ITS1; 5.8S; ITS2
Taxillus chinensis	KF447377	A. Chveerach 866	Taxillus chinensis voucher A. Chveerach 866 PsbA (psbA) gene, partial cds; psbA-trnH intergenic spacer, complete sequence; and tRNA-His (trnH) gene, partial sequence; chloroplast.	Chaveerach,A., Sudmoon,R., Noikotr,K., Kwanda,N. and Tanee,T.	Unpublished	Lorantheae	Scurrulinae	Taxillus	genomic DNA	Chloroplast	263	trnH-psbA
Taxillus chinensis	KF447376	A. Chveerach 866	Taxillus chinensis voucher A. Chveerach 866 ribulose-1,5-bisphosphate carboxylase/oxygenase large subunit (rbcL) gene, partial cds; chloroplast.	Chaveerach,A., Sudmoon,R., Noikotr,K., Kwanda,N. and Tanee,T.	Unpublished	Lorantheae	Scurrulinae	Taxillus	genomic DNA	Chloroplast	447	rbcL
Taxillus chinensis	KP093186	UNKNOWN	Taxillus chinensis isolate SCBGP295_1 18S ribosomal RNA gene, partial sequence; internal transcribed spacer 1, 5.8S ribosomal RNA gene, and internal transcribed spacer 2, complete sequence; and 28S ribosomal RNA gene, partial sequence.	Liu,J., Yan,H.-F., Newmaster,S.G., Pei,N., Ragupathy,S. and	Divers. Distrib. 21 (2), 188-199 (2015)	Lorantheae	Scurrulinae	Taxillus	genomic DNA	Nucleolus	700	ITS1; 5.8S; ITS2
Taxillus chinensis	KP093187	UNKNOWN	Taxillus chinensis isolate SCBGP295_2 18S ribosomal RNA gene, partial sequence; internal transcribed spacer 1, 5.8S ribosomal RNA gene, and internal transcribed spacer 2, complete sequence; and 28S ribosomal RNA gene, partial sequence.	Liu,J., Yan,H.-F., Newmaster,S.G., Pei,N., Ragupathy,S. and	Divers. Distrib. 21 (2), 188-199 (2015)	Lorantheae	Scurrulinae	Taxillus	genomic DNA	Nucleolus	700	ITS1; 5.8S; ITS2
Taxillus chinensis	KP093763	UNKNOWN	Taxillus chinensis isolate SCBGP295_1 maturase K (matK) gene, partial cds; chloroplast.	Liu,J., Yan,H.-F., Newmaster,S.G., Pei,N., Ragupathy,S. and	Divers. Distrib. 21 (2), 188-199 (2015)	Lorantheae	Scurrulinae	Taxillus	genomic DNA	Chloroplast	755	matK
Taxillus chinensis	KP093764	UNKNOWN	Taxillus chinensis isolate SCBGP295_2 maturase K (matK) gene, partial cds; chloroplast.	Liu,J., Yan,H.-F., Newmaster,S.G., Pei,N., Ragupathy,S. and	Divers. Distrib. 21 (2), 188-199 (2015)	Lorantheae	Scurrulinae	Taxillus	genomic DNA	Chloroplast	768	matK
Taxillus chinensis	KP094700	UNKNOWN	Taxillus chinensis isolate SCBGP295_1 ribulose-1,5-bisphosphate carboxylase/oxygenase large subunit (rbcL) gene, partial cds; chloroplast.	Liu,J., Yan,H.-F., Newmaster,S.G., Pei,N., Ragupathy,S. and	Divers. Distrib. 21 (2), 188-199 (2015)	Lorantheae	Scurrulinae	Taxillus	genomic DNA	Chloroplast	562	rbcL
Taxillus chinensis	KP094701	UNKNOWN	Taxillus chinensis isolate SCBGP295_2 ribulose-1,5-bisphosphate carboxylase/oxygenase large subunit (rbcL) gene, partial cds; chloroplast.	Liu,J., Yan,H.-F., Newmaster,S.G., Pei,N., Ragupathy,S. and	Divers. Distrib. 21 (2), 188-199 (2015)	Lorantheae	Scurrulinae	Taxillus	genomic DNA	Chloroplast	562	rbcL
Taxillus chinensis	KP095917	UNKNOWN	Taxillus chinensis isolate SCBGP295_1 photosystem II protein D1 (psbA), psbA-trnH intergenic spacer, and tRNA-His (trnH), region; chloroplast.	Liu,J., Yan,H.-F., Newmaster,S.G., Pei,N., Ragupathy,S. and	Divers. Distrib. 21 (2), 188-199 (2015)	Lorantheae	Scurrulinae	Taxillus	genomic DNA	Chloroplast	257	trnH-psbA
Taxillus limprichtii	HQ317791	LS12	Taxillus limprichtii voucher LS12 ribulose-1,5-bisphosphate carboxylase/oxygenase large subunit (rbcL) gene, partial cds; chloroplast.	Li,Y.-H., Chen,S.-L., Yao,H. and Luo,K.	Unpublished	Lorantheae	Scurrulinae	Taxillus	genomic DNA	Chloroplast	703	rbcL
Taxillus limprichtii	HQ317792	LS13	Taxillus limprichtii voucher LS13 ribulose-1,5-bisphosphate carboxylase/oxygenase large subunit (rbcL) gene, partial cds; chloroplast.	Li,Y.-H., Chen,S.-L., Yao,H. and Luo,K.	Unpublished	Lorantheae	Scurrulinae	Taxillus	genomic DNA	Chloroplast	703	rbcL
Taxillus limprichtii	HQ317793	LS15	Taxillus limprichtii voucher LS15 ribulose-1,5-bisphosphate carboxylase/oxygenase large subunit (rbcL) gene, partial cds; chloroplast.	Li,Y.-H., Chen,S.-L., Yao,H. and Luo,K.	Unpublished	Lorantheae	Scurrulinae	Taxillus	genomic DNA	Chloroplast	703	rbcL
Taxillus limprichtii	HQ317832	LS12	Taxillus limprichtii voucher LS12 PsbA (psbA) gene, partial cds; psbA-trnH intergenic spacer, complete sequence; and tRNA-His (trnH) gene, partial sequence; chloroplast.	Li,Y.-H., Chen,S.-L., Yao,H. and Luo,K.	Unpublished	Lorantheae	Scurrulinae	Taxillus	genomic DNA	Chloroplast	272	trnH-psbA
Taxillus limprichtii	HQ317833	LS13	Taxillus limprichtii voucher LS13 PsbA (psbA) gene, partial cds; psbA-trnH intergenic spacer, complete sequence; and tRNA-His (trnH) gene, partial sequence; chloroplast.	Li,Y.-H., Chen,S.-L., Yao,H. and Luo,K.	Unpublished	Lorantheae	Scurrulinae	Taxillus	genomic DNA	Chloroplast	272	trnH-psbA
Taxillus limprichtii	HQ317834	LS15	Taxillus limprichtii voucher LS15 PsbA (psbA) gene, partial cds; psbA-trnH intergenic spacer, complete sequence; and tRNA-His (trnH) gene, partial sequence; chloroplast.	Li,Y.-H., Chen,S.-L., Yao,H. and Luo,K.	Unpublished	Lorantheae	Scurrulinae	Taxillus	genomic DNA	Chloroplast	273	trnH-psbA
Taxillus nigrans	HQ317794	LS20	Taxillus nigrans voucher LS20 ribulose-1,5-bisphosphate carboxylase/oxygenase large subunit (rbcL) gene, partial cds; chloroplast.	Li,Y.-H., Chen,S.-L., Yao,H. and Luo,K.	Unpublished	Lorantheae	Scurrulinae	Taxillus	genomic DNA	Chloroplast	703	rbcL
Taxillus nigrans	HQ317795	LS21	Taxillus nigrans voucher LS21 ribulose-1,5-bisphosphate carboxylase/oxygenase large subunit (rbcL) gene, partial cds; chloroplast.	Li,Y.-H., Chen,S.-L., Yao,H. and Luo,K.	Unpublished	Lorantheae	Scurrulinae	Taxillus	genomic DNA	Chloroplast	703	rbcL
Taxillus nigrans	HQ317835	LS20	Taxillus nigrans voucher LS20 PsbA (psbA) gene, partial cds; psbA-trnH intergenic spacer, complete sequence; and tRNA-His (trnH) gene, partial sequence; chloroplast.	Li,Y.-H., Chen,S.-L., Yao,H. and Luo,K.	Unpublished	Lorantheae	Scurrulinae	Taxillus	genomic DNA	Chloroplast	224	trnH-psbA
Taxillus nigrans	HQ317836	LS21	Taxillus nigrans voucher LS21 PsbA (psbA) gene, partial cds; psbA-trnH intergenic spacer, complete sequence; and tRNA-His (trnH) gene, partial sequence; chloroplast.	Li,Y.-H., Chen,S.-L., Yao,H. and Luo,K.	Unpublished	Lorantheae	Scurrulinae	Taxillus	genomic DNA	Chloroplast	224	trnH-psbA
Taxillus pseudochinensis	KP263288	Su 018	Taxillus pseudochinensis voucher Su 018 18S ribosomal RNA gene, partial sequence.	Su,H.-J., Hu,J.-M., Anderson,F.E., Der,J. and Nickrent,D.L.	Taxon 64 (3), 491-506 (2015)	Lorantheae	Scurrulinae	Taxillus	genomic DNA	Nucleolus	1714	18S
Taxillus pseudochinensis	KP263360	Su 018	Taxillus pseudochinensis voucher Su 018 RNA polymerase II second largest subunit (RPB2) gene, partial cds.	Su,H.-J., Hu,J.-M., Anderson,F.E., Der,J. and Nickrent,D.L.	Taxon 64 (3), 491-506 (2015)	Lorantheae	Scurrulinae	Taxillus	genomic DNA	Nucleolus	1683	RPB2
Taxillus sclerophyllus	JQ933498	Chase, 17408, (K)	Taxillus sclerophyllus voucher Chase, 17408, (K) ribulose-1,5-bisphosphate carboxylase/oxygenase large subunit (rbcL) gene, partial cds; plastid.	Saslis-Lagoudakis,C.H., Savolainen,V., Williamson,E.M., Forest,F.,	Proc. Natl. Acad. Sci. U.S.A. 109 (39), 15835-15840 (2012)	Lorantheae	Scurrulinae	Taxillus	genomic DNA	Chloroplast	675	rbcL
Taxillus sutchuenensis	AY191133	UNKNOWN	Taxillus sutchuenensis tRNA-Leu (trnL) gene, partial sequence; chloroplast gene for chloroplast product.	Han,R.L., Hao,G. and Zhang,D.X.	Unpublished	Lorantheae	Scurrulinae	Taxillus	genomic DNA	Chloroplast	313	trnL/LF
Taxillus sutchuenensis	HQ317796	LS16	Taxillus sutchuenensis voucher LS16 ribulose-1,5-bisphosphate carboxylase/oxygenase large subunit (rbcL) gene, partial cds; chloroplast.	Li,Y.-H., Chen,S.-L., Yao,H. and Luo,K.	Unpublished	Lorantheae	Scurrulinae	Taxillus	genomic DNA	Chloroplast	703	rbcL
Taxillus sutchuenensis	HQ317797	LS17	Taxillus sutchuenensis voucher LS17 ribulose-1,5-bisphosphate carboxylase/oxygenase large subunit (rbcL) gene, partial cds; chloroplast.	Li,Y.-H., Chen,S.-L., Yao,H. and Luo,K.	Unpublished	Lorantheae	Scurrulinae	Taxillus	genomic DNA	Chloroplast	703	rbcL
Taxillus sutchuenensis	HQ317837	LS16	Taxillus sutchuenensis voucher LS16 PsbA (psbA) gene, partial cds; psbA-trnH intergenic spacer, complete sequence; and tRNA-His (trnH) gene, partial sequence; chloroplast.	Li,Y.-H., Chen,S.-L., Yao,H. and Luo,K.	Unpublished	Lorantheae	Scurrulinae	Taxillus	genomic DNA	Chloroplast	230	trnH-psbA
Taxillus sutchuenensis	HQ317838	LS17	Taxillus sutchuenensis voucher LS17 PsbA (psbA) gene, partial cds; psbA-trnH intergenic spacer, complete sequence; and tRNA-His (trnH) gene, partial sequence; chloroplast.	Li,Y.-H., Chen,S.-L., Yao,H. and Luo,K.	Unpublished	Lorantheae	Scurrulinae	Taxillus	genomic DNA	Chloroplast	230	trnH-psbA
Taxillus sutchuenensis	HQ317798	LS10	Taxillus sutchuenensis var. duclouxii voucher LS10 ribulose-1,5-bisphosphate carboxylase/oxygenase large subunit (rbcL) gene, partial cds; chloroplast.	Li,Y.-H., Chen,S.-L., Yao,H. and Luo,K.	Unpublished	Lorantheae	Scurrulinae	Taxillus	genomic DNA	Chloroplast	703	rbcL
Taxillus sutchuenensis	HQ317799	LS11	Taxillus sutchuenensis var. duclouxii voucher LS11 ribulose-1,5-bisphosphate carboxylase/oxygenase large subunit (rbcL) gene, partial cds; chloroplast.	Li,Y.-H., Chen,S.-L., Yao,H. and Luo,K.	Unpublished	Lorantheae	Scurrulinae	Taxillus	genomic DNA	Chloroplast	703	rbcL
Taxillus sutchuenensis	HQ317839	LS10	Taxillus sutchuenensis var. duclouxii voucher LS10 PsbA (psbA) gene, partial cds; psbA-trnH intergenic spacer, complete sequence; and tRNA-His (trnH) gene, partial sequence; chloroplast.	Li,Y.-H., Chen,S.-L., Yao,H. and Luo,K.	Unpublished	Lorantheae	Scurrulinae	Taxillus	genomic DNA	Chloroplast	224	trnH-psbA
Taxillus sutchuenensis	HQ317840	LS11	Taxillus sutchuenensis var. duclouxii voucher LS11 PsbA (psbA) gene, partial cds; psbA-trnH intergenic spacer, complete sequence; and tRNA-His (trnH) gene, partial sequence; chloroplast.	Li,Y.-H., Chen,S.-L., Yao,H. and Luo,K.	Unpublished	Lorantheae	Scurrulinae	Taxillus	genomic DNA	Chloroplast	224	trnH-psbA
Taxillus wiensii	DQ333829	A. Robertson 7364	Taxillus wiensii internal transcribed spacer 1, partial sequence; 5.8S ribosomal RNA gene, complete sequence; and internal transcribed spacer 2, partial sequence.	Wilson,C.A. and Calvin,C.L.	Am. J. Bot. 93 (5), 787-796 (2006)	Lorantheae	Scurrulinae	Taxillus	genomic DNA	Nucleolus	511	ITS1; 5.8S; ITS2
Taxillus wiensii	DQ340578	A. Robertson 7364	Taxillus wiensii tRNA-Leu (trnL) gene and trnL-trnF intergenic spacer, partial sequence; chloroplast.	Wilson,C.A. and Calvin,C.L.	Am. J. Bot. 93 (5), 787-796 (2006)	Lorantheae	Scurrulinae	Taxillus	genomic DNA	Chloroplast	634	trnL/LF
Tolypanthus involucratus	EU544461	Nickrent 4907	Tolypanthus involucratus voucher Nickrent 4907 maturase K (matK) gene, partial cds; chloroplast.	Vidal-Russell,R. and Nickrent,D.L.	Am. J. Bot. 95 (8), 1015-1029 (2008)	Lorantheae	Dendrophthoinae	Tolypanthus	genomic DNA	Chloroplast	1288	matK
Tolypanthus maclurei	HQ317757	LS01	Tolypanthus maclurei voucher LS01 ribulose-1,5-bisphosphate carboxylase/oxygenase large subunit (rbcL) gene, partial cds; chloroplast.	Li,Y.-H., Chen,S.-L., Yao,H. and Luo,K.	Unpublished	Lorantheae	Dendrophthoinae	Tolypanthus	genomic DNA	Chloroplast	703	rbcL
Tolypanthus maclurei	HQ317758	LS02	Tolypanthus maclurei voucher LS02 ribulose-1,5-bisphosphate carboxylase/oxygenase large subunit (rbcL) gene, partial cds; chloroplast.	Li,Y.-H., Chen,S.-L., Yao,H. and Luo,K.	Unpublished	Lorantheae	Dendrophthoinae	Tolypanthus	genomic DNA	Chloroplast	703	rbcL
Tolypanthus maclurei	HQ317841	LS01	Tolypanthus maclurei voucher LS01 PsbA (psbA) gene, partial cds; psbA-trnH intergenic spacer, complete sequence; and tRNA-His (trnH) gene, partial sequence; chloroplast.	Li,Y.-H., Chen,S.-L., Yao,H. and Luo,K.	Unpublished	Lorantheae	Dendrophthoinae	Tolypanthus	genomic DNA	Chloroplast	326	trnH-psbA
Tolypanthus maclurei	HQ317842	LS02	Tolypanthus maclurei voucher LS02 PsbA (psbA) gene, partial cds; psbA-trnH intergenic spacer, complete sequence; and tRNA-His (trnH) gene, partial sequence; chloroplast.	Li,Y.-H., Chen,S.-L., Yao,H. and Luo,K.	Unpublished	Lorantheae	Dendrophthoinae	Tolypanthus	genomic DNA	Chloroplast	328	trnH-psbA
Tripodanthus acutifolius	L24424	UNKNOWN	Tripodanthus acutifolius (Ruiz and Pavon) Tiegh. 18S ribosomal RNA gene, partial sequence.	Nickrent,D.L. and Duff,R.J.	(in) Moreno,M.T., Cubero,J.I., Berner,D., Joel,D., Musselman,L.J.	Psittacantheae	Psittacanthinae	Tripodanthus	genomic DNA	Nucleolus	1766	18S
Tripodanthus acutifolius	DQ333864	Calvin and Wilson AR03-04	Tripodanthus acutifolius internal transcribed spacer 1, partial sequence; 5.8S ribosomal RNA gene, complete sequence; and internal transcribed spacer 2, partial sequence.	Wilson,C.A. and Calvin,C.L.	Am. J. Bot. 93 (5), 787-796 (2006)	Psittacantheae	Psittacanthinae	Tripodanthus	genomic DNA	Nucleolus	669	ITS1; 5.8S; ITS2
Tripodanthus acutifolius	DQ340615	Calvin and Wilson AR03-04	Tripodanthus acutifolius tRNA-Leu (trnL) gene and trnL-trnF intergenic spacer, partial sequence; chloroplast.	Wilson,C.A. and Calvin,C.L.	Am. J. Bot. 93 (5), 787-796 (2006)	Psittacantheae	Psittacanthinae	Tripodanthus	genomic DNA	Chloroplast	691	trnL/LF
Tripodanthus acutifolius	EU544406	Nickrent 2969	Tripodanthus acutifolius voucher Nickrent 2969 26S ribosomal RNA gene, partial sequence.	Vidal-Russell,R. and Nickrent,D.L.	Am. J. Bot. 95 (8), 1015-1029 (2008)	Psittacantheae	Psittacanthinae	Tripodanthus	genomic DNA	Nucleolus	2127	25S
Tripodanthus acutifolius	EU544462	Nickrent 2969	Tripodanthus acutifolius voucher Nickrent 2969 maturase K (matK) gene, partial cds; chloroplast.	Vidal-Russell,R. and Nickrent,D.L.	Am. J. Bot. 95 (8), 1015-1029 (2008)	Psittacantheae	Psittacanthinae	Tripodanthus	genomic DNA	Chloroplast	1400	matK
Tripodanthus acutifolius	EU544475	Nickrent 4927	Tripodanthus acutifolius voucher Nickrent 4927 ribulose-1,5-bisphosphate carboxylase/oxygenase large subunit (rbcL) gene, partial cds; chloroplast.	Vidal-Russell,R. and Nickrent,D.L.	Unpublished	Psittacantheae	Psittacanthinae	Tripodanthus	genomic DNA	Chloroplast	830	rbcL
Tripodanthus acutifolius	EU544513	Nickrent 4927	Tripodanthus acutifolius voucher Nickrent 4927 tRNA-Leu (trnL) gene, partial sequence; trnL-trnF intergenic spacer, complete sequence; and tRNA-Phe (trnF) gene, partial sequence; chloroplast.	Vidal-Russell,R. and Nickrent,D.L.	Am. J. Bot. 95 (8), 1015-1029 (2008)	Psittacantheae	Psittacanthinae	Tripodanthus	genomic DNA	Chloroplast	693	trnL/LF
Tripodanthus acutifolius	HM010404	Nickrent 4983	Tripodanthus acutifolius voucher Nickrent 4983 internal transcribed spacer 1, partial sequence; 5.8S ribosomal RNA gene, complete sequence; and internal transcribed spacer 2, partial sequence.	Amico,G.C., Vidal-Russell,R., Garcia,M.A. and Nickrent,D.L.	Syst. Bot. 37 (1), 218-225 (2012)	Psittacantheae	Psittacanthinae	Tripodanthus	genomic DNA	Nucleolus	688	ITS1; 5.8S; ITS2
Tripodanthus acutifolius	HM010405	Nickrent 4998	Tripodanthus acutifolius voucher Nickrent 4998 18S ribosomal RNA gene, partial sequence; internal transcribed spacer 1, 5.8S ribosomal RNA gene, and internal transcribed spacer 2, complete sequence; and 28S ribosomal RNA gene, partial sequence.	Amico,G.C., Vidal-Russell,R., Garcia,M.A. and Nickrent,D.L.	Syst. Bot. 37 (1), 218-225 (2012)	Psittacantheae	Psittacanthinae	Tripodanthus	genomic DNA	Nucleolus	726	ITS1; 5.8S; ITS2
Tripodanthus acutifolius	HM010410	Nickrent 5321	Tripodanthus acutifolius voucher Nickrent 5321 internal transcribed spacer 1, partial sequence; 5.8S ribosomal RNA gene and internal transcribed spacer 2, complete sequence; and 28S ribosomal RNA gene, partial sequence.	Amico,G.C., Vidal-Russell,R., Garcia,M.A. and Nickrent,D.L.	Syst. Bot. 37 (1), 218-225 (2012)	Psittacantheae	Psittacanthinae	Tripodanthus	genomic DNA	Nucleolus	689	ITS1; 5.8S; ITS2
Tripodanthus acutifolius	HM010411	Nickrent 5323	Tripodanthus acutifolius voucher Nickrent 5323 internal transcribed spacer 1, partial sequence; 5.8S ribosomal RNA gene, complete sequence; and internal transcribed spacer 2, partial sequence.	Amico,G.C., Vidal-Russell,R., Garcia,M.A. and Nickrent,D.L.	Syst. Bot. 37 (1), 218-225 (2012)	Psittacantheae	Psittacanthinae	Tripodanthus	genomic DNA	Nucleolus	620	ITS1; 5.8S; ITS2
Tripodanthus acutifolius	HM010412	Nickrent 5325	Tripodanthus acutifolius voucher Nickrent 5325 18S ribosomal RNA gene, partial sequence; internal transcribed spacer 1, 5.8S ribosomal RNA gene, and internal transcribed spacer 2, complete sequence; and 28S ribosomal RNA gene, partial sequence.	Amico,G.C., Vidal-Russell,R., Garcia,M.A. and Nickrent,D.L.	Syst. Bot. 37 (1), 218-225 (2012)	Psittacantheae	Psittacanthinae	Tripodanthus	genomic DNA	Nucleolus	712	ITS1; 5.8S; ITS2
Tripodanthus acutifolius	HM010413	Nickrent 5326	Tripodanthus acutifolius voucher Nickrent 5326 18S ribosomal RNA gene, partial sequence; internal transcribed spacer 1, 5.8S ribosomal RNA gene, and internal transcribed spacer 2, complete sequence; and 28S ribosomal RNA gene, partial sequence.	Amico,G.C., Vidal-Russell,R., Garcia,M.A. and Nickrent,D.L.	Syst. Bot. 37 (1), 218-225 (2012)	Psittacantheae	Psittacanthinae	Tripodanthus	genomic DNA	Nucleolus	727	ITS1; 5.8S; ITS2
Tripodanthus acutifolius	HM010414	Nickrent 5330	Tripodanthus acutifolius voucher Nickrent 5330 18S ribosomal RNA gene, partial sequence; internal transcribed spacer 1, 5.8S ribosomal RNA gene, and internal transcribed spacer 2, complete sequence; and 28S ribosomal RNA gene, partial sequence.	Amico,G.C., Vidal-Russell,R., Garcia,M.A. and Nickrent,D.L.	Syst. Bot. 37 (1), 218-225 (2012)	Psittacantheae	Psittacanthinae	Tripodanthus	genomic DNA	Nucleolus	729	ITS1; 5.8S; ITS2
Tripodanthus acutifolius	HM010415	Nickrent 5345	Tripodanthus acutifolius voucher Nickrent 5345 internal transcribed spacer 1, partial sequence; 5.8S ribosomal RNA gene, complete sequence; and internal transcribed spacer 2, partial sequence.	Amico,G.C., Vidal-Russell,R., Garcia,M.A. and Nickrent,D.L.	Syst. Bot. 37 (1), 218-225 (2012)	Psittacantheae	Psittacanthinae	Tripodanthus	genomic DNA	Nucleolus	687	ITS1; 5.8S; ITS2
Tripodanthus acutifolius	HM010416	Nickrent 5346	Tripodanthus acutifolius voucher Nickrent 5346 18S ribosomal RNA gene, partial sequence; internal transcribed spacer 1, 5.8S ribosomal RNA gene, and internal transcribed spacer 2, complete sequence; and 28S ribosomal RNA gene, partial sequence.	Amico,G.C., Vidal-Russell,R., Garcia,M.A. and Nickrent,D.L.	Syst. Bot. 37 (1), 218-225 (2012)	Psittacantheae	Psittacanthinae	Tripodanthus	genomic DNA	Nucleolus	730	ITS1; 5.8S; ITS2
Tripodanthus acutifolius	HM010417	Nickrent 5349	Tripodanthus acutifolius voucher Nickrent 5349 18S ribosomal RNA gene, partial sequence; internal transcribed spacer 1, 5.8S ribosomal RNA gene, and internal transcribed spacer 2, complete sequence; and 28S ribosomal RNA gene, partial sequence.	Amico,G.C., Vidal-Russell,R., Garcia,M.A. and Nickrent,D.L.	Syst. Bot. 37 (1), 218-225 (2012)	Psittacantheae	Psittacanthinae	Tripodanthus	genomic DNA	Nucleolus	726	ITS1; 5.8S; ITS2
Tripodanthus acutifolius	HM010418	Nickrent 5350	Tripodanthus acutifolius voucher Nickrent 5350 18S ribosomal RNA gene, partial sequence; internal transcribed spacer 1, 5.8S ribosomal RNA gene, and internal transcribed spacer 2, complete sequence; and 28S ribosomal RNA gene, partial sequence.	Amico,G.C., Vidal-Russell,R., Garcia,M.A. and Nickrent,D.L.	Syst. Bot. 37 (1), 218-225 (2012)	Psittacantheae	Psittacanthinae	Tripodanthus	genomic DNA	Nucleolus	714	ITS1; 5.8S; ITS2
Tripodanthus acutifolius	HM010419	Nickrent 5548	Tripodanthus acutifolius voucher Nickrent 5548 internal transcribed spacer 1, partial sequence; 5.8S ribosomal RNA gene, complete sequence; and internal transcribed spacer 2, partial sequence.	Amico,G.C., Vidal-Russell,R., Garcia,M.A. and Nickrent,D.L.	Syst. Bot. 37 (1), 218-225 (2012)	Psittacantheae	Psittacanthinae	Tripodanthus	genomic DNA	Nucleolus	686	ITS1; 5.8S; ITS2
Tripodanthus acutifolius	HM010421	Nickrent 5550	Tripodanthus acutifolius voucher Nickrent 5550 18S ribosomal RNA gene, partial sequence; internal transcribed spacer 1, 5.8S ribosomal RNA gene, and internal transcribed spacer 2, complete sequence; and 28S ribosomal RNA gene, partial sequence.	Amico,G.C., Vidal-Russell,R., Garcia,M.A. and Nickrent,D.L.	Syst. Bot. 37 (1), 218-225 (2012)	Psittacantheae	Psittacanthinae	Tripodanthus	genomic DNA	Nucleolus	726	ITS1; 5.8S; ITS2
Tripodanthus acutifolius	HM010422	Nickrent 5551	Tripodanthus acutifolius voucher Nickrent 5551 18S ribosomal RNA gene, partial sequence; internal transcribed spacer 1 and 5.8S ribosomal RNA gene, complete sequence; and internal transcribed spacer 2, partial sequence.	Amico,G.C., Vidal-Russell,R., Garcia,M.A. and Nickrent,D.L.	Syst. Bot. 37 (1), 218-225 (2012)	Psittacantheae	Psittacanthinae	Tripodanthus	genomic DNA	Nucleolus	697	ITS1; 5.8S; ITS2
Tripodanthus acutifolius	HM010425	Nickrent 4983	Tripodanthus acutifolius voucher Nickrent 4983 tRNA-Leu (trnL) gene, partial sequence; trnL-trnF intergenic spacer, complete sequence; and tRNA-Phe (trnF) gene, partial sequence; chloroplast.	Amico,G.C., Vidal-Russell,R., Garcia,M.A. and Nickrent,D.L.	Syst. Bot. 37 (1), 218-225 (2012)	Psittacantheae	Psittacanthinae	Tripodanthus	genomic DNA	Chloroplast	627	trnL/LF
Tripodanthus acutifolius	HM010426	Nickrent 4998	Tripodanthus acutifolius voucher Nickrent 4998 tRNA-Leu (trnL) gene, partial sequence; trnL-trnF intergenic spacer, complete sequence; and tRNA-Phe (trnF) gene, partial sequence; chloroplast.	Amico,G.C., Vidal-Russell,R., Garcia,M.A. and Nickrent,D.L.	Syst. Bot. 37 (1), 218-225 (2012)	Psittacantheae	Psittacanthinae	Tripodanthus	genomic DNA	Chloroplast	686	trnL/LF
Tripodanthus acutifolius	HM010431	Nickrent 5318	Tripodanthus acutifolius voucher Nickrent 5318 tRNA-Leu (trnL) gene, partial sequence; trnL-trnF intergenic spacer, complete sequence; and tRNA-Phe (trnF) gene, partial sequence; chloroplast.	Amico,G.C., Vidal-Russell,R., Garcia,M.A. and Nickrent,D.L.	Syst. Bot. 37 (1), 218-225 (2012)	Psittacantheae	Psittacanthinae	Tripodanthus	genomic DNA	Chloroplast	590	trnL/LF
Tripodanthus acutifolius	HM010432	Nickrent 5321	Tripodanthus acutifolius voucher Nickrent 5321 tRNA-Leu (trnL) gene, partial sequence; trnL-trnF intergenic spacer, complete sequence; and tRNA-Phe (trnF) gene, partial sequence; chloroplast.	Amico,G.C., Vidal-Russell,R., Garcia,M.A. and Nickrent,D.L.	Syst. Bot. 37 (1), 218-225 (2012)	Psittacantheae	Psittacanthinae	Tripodanthus	genomic DNA	Chloroplast	687	trnL/LF
Tripodanthus acutifolius	HM010433	Nickrent 5323	Tripodanthus acutifolius voucher Nickrent 5323 tRNA-Leu (trnL) gene, partial sequence; trnL-trnF intergenic spacer, complete sequence; and tRNA-Phe (trnF) gene, partial sequence; chloroplast.	Amico,G.C., Vidal-Russell,R., Garcia,M.A. and Nickrent,D.L.	Syst. Bot. 37 (1), 218-225 (2012)	Psittacantheae	Psittacanthinae	Tripodanthus	genomic DNA	Chloroplast	690	trnL/LF
Tripodanthus acutifolius	HM010434	Nickrent 5325	Tripodanthus acutifolius voucher Nickrent 5325 tRNA-Leu (trnL) gene, partial sequence; trnL-trnF intergenic spacer, complete sequence; and tRNA-Phe (trnF) gene, partial sequence; chloroplast.	Amico,G.C., Vidal-Russell,R., Garcia,M.A. and Nickrent,D.L.	Syst. Bot. 37 (1), 218-225 (2012)	Psittacantheae	Psittacanthinae	Tripodanthus	genomic DNA	Chloroplast	691	trnL/LF
Tripodanthus acutifolius	HM010435	Nickrent 5326	Tripodanthus acutifolius voucher Nickrent 5326 tRNA-Leu (trnL) gene, partial sequence; and trnL-trnF intergenic spacer, complete sequence; chloroplast.	Amico,G.C., Vidal-Russell,R., Garcia,M.A. and Nickrent,D.L.	Syst. Bot. 37 (1), 218-225 (2012)	Psittacantheae	Psittacanthinae	Tripodanthus	genomic DNA	Chloroplast	653	trnL/LF
Tripodanthus acutifolius	HM010436	Nickrent 5330	Tripodanthus acutifolius voucher Nickrent 5330 tRNA-Leu (trnL) gene, partial sequence; trnL-trnF intergenic spacer, complete sequence; and tRNA-Phe (trnF) gene, partial sequence; chloroplast.	Amico,G.C., Vidal-Russell,R., Garcia,M.A. and Nickrent,D.L.	Syst. Bot. 37 (1), 218-225 (2012)	Psittacantheae	Psittacanthinae	Tripodanthus	genomic DNA	Chloroplast	697	trnL/LF
Tripodanthus acutifolius	HM010437	Nickrent 5345	Tripodanthus acutifolius voucher Nickrent 5345 tRNA-Leu (trnL) gene, partial sequence; and trnL-trnF intergenic spacer, complete sequence; chloroplast.	Amico,G.C., Vidal-Russell,R., Garcia,M.A. and Nickrent,D.L.	Syst. Bot. 37 (1), 218-225 (2012)	Psittacantheae	Psittacanthinae	Tripodanthus	genomic DNA	Chloroplast	640	trnL/LF
Tripodanthus acutifolius	HM010438	Nickrent 5346	Tripodanthus acutifolius voucher Nickrent 5346 tRNA-Leu (trnL) gene, partial sequence; and trnL-trnF intergenic spacer, complete sequence; chloroplast.	Amico,G.C., Vidal-Russell,R., Garcia,M.A. and Nickrent,D.L.	Syst. Bot. 37 (1), 218-225 (2012)	Psittacantheae	Psittacanthinae	Tripodanthus	genomic DNA	Chloroplast	633	trnL/LF
Tripodanthus acutifolius	HM010439	Nickrent 5349	Tripodanthus acutifolius voucher Nickrent 5349 tRNA-Leu (trnL) gene, partial sequence; and trnL-trnF intergenic spacer, complete sequence; chloroplast.	Amico,G.C., Vidal-Russell,R., Garcia,M.A. and Nickrent,D.L.	Syst. Bot. 37 (1), 218-225 (2012)	Psittacantheae	Psittacanthinae	Tripodanthus	genomic DNA	Chloroplast	642	trnL/LF
Tripodanthus acutifolius	HM010440	Nickrent 5350	Tripodanthus acutifolius voucher Nickrent 5350 tRNA-Leu (trnL) gene, partial sequence; trnL-trnF intergenic spacer, complete sequence; and tRNA-Phe (trnF) gene, partial sequence; chloroplast.	Amico,G.C., Vidal-Russell,R., Garcia,M.A. and Nickrent,D.L.	Syst. Bot. 37 (1), 218-225 (2012)	Psittacantheae	Psittacanthinae	Tripodanthus	genomic DNA	Chloroplast	668	trnL/LF
Tripodanthus acutifolius	HM010441	Nickrent 5548	Tripodanthus acutifolius voucher Nickrent 5548 tRNA-Leu (trnL) gene, partial sequence; trnL-trnF intergenic spacer, complete sequence; and tRNA-Phe (trnF) gene, partial sequence; chloroplast.	Amico,G.C., Vidal-Russell,R., Garcia,M.A. and Nickrent,D.L.	Syst. Bot. 37 (1), 218-225 (2012)	Psittacantheae	Psittacanthinae	Tripodanthus	genomic DNA	Chloroplast	638	trnL/LF
Tripodanthus acutifolius	HM010443	Nickrent 5550	Tripodanthus acutifolius voucher Nickrent 5550 tRNA-Leu (trnL) gene, partial sequence; trnL-trnF intergenic spacer, complete sequence; and tRNA-Phe (trnF) gene, partial sequence; chloroplast.	Amico,G.C., Vidal-Russell,R., Garcia,M.A. and Nickrent,D.L.	Syst. Bot. 37 (1), 218-225 (2012)	Psittacantheae	Psittacanthinae	Tripodanthus	genomic DNA	Chloroplast	692	trnL/LF
Tripodanthus acutifolius	HM010444	Nickrent 5551	Tripodanthus acutifolius voucher Nickrent 5551 tRNA-Leu (trnL) gene, partial sequence; trnL-trnF intergenic spacer, complete sequence; and tRNA-Phe (trnF) gene, partial sequence; chloroplast.	Amico,G.C., Vidal-Russell,R., Garcia,M.A. and Nickrent,D.L.	Syst. Bot. 37 (1), 218-225 (2012)	Psittacantheae	Psittacanthinae	Tripodanthus	genomic DNA	Chloroplast	661	trnL/LF
Tripodanthus acutifolius	HM010447	Nickrent 4927	Tripodanthus acutifolius voucher Nickrent 4927 atpB-rbcL intergenic spacer, partial sequence; and ribulose-1,5-bisphosphate carboxylase/oxygenase large subunit (rbcL) gene, partial cds; chloroplast.	Amico,G.C., Vidal-Russell,R., Garcia,M.A. and Nickrent,D.L.	Syst. Bot. 37 (1), 218-225 (2012)	Psittacantheae	Psittacanthinae	Tripodanthus	genomic DNA	Chloroplast	519	atpB-rbcL
Tripodanthus acutifolius	HM010448	Nickrent 4998	Tripodanthus acutifolius voucher Nickrent 4998 atpB-rbcL intergenic spacer, partial sequence; and ribulose-1,5-bisphosphate carboxylase/oxygenase large subunit (rbcL) gene, partial cds; chloroplast.	Amico,G.C., Vidal-Russell,R., Garcia,M.A. and Nickrent,D.L.	Syst. Bot. 37 (1), 218-225 (2012)	Psittacantheae	Psittacanthinae	Tripodanthus	genomic DNA	Chloroplast	518	atpB-rbcL
Tripodanthus acutifolius	HM010451	Nickrent 5318	Tripodanthus acutifolius voucher Nickrent 5318 atpB-rbcL intergenic spacer, partial sequence; and ribulose-1,5-bisphosphate carboxylase/oxygenase large subunit (rbcL) gene, partial cds; chloroplast.	Amico,G.C., Vidal-Russell,R., Garcia,M.A. and Nickrent,D.L.	Syst. Bot. 37 (1), 218-225 (2012)	Psittacantheae	Psittacanthinae	Tripodanthus	genomic DNA	Chloroplast	634	atpB-rbcL
Tripodanthus acutifolius	HM010452	Nickrent 5321	Tripodanthus acutifolius voucher Nickrent 5321 atpB-rbcL intergenic spacer, partial sequence; and ribulose-1,5-bisphosphate carboxylase/oxygenase large subunit (rbcL) gene, partial cds; chloroplast.	Amico,G.C., Vidal-Russell,R., Garcia,M.A. and Nickrent,D.L.	Syst. Bot. 37 (1), 218-225 (2012)	Psittacantheae	Psittacanthinae	Tripodanthus	genomic DNA	Chloroplast	524	atpB-rbcL
Tripodanthus acutifolius	HM010453	Nickrent 5323	Tripodanthus acutifolius voucher Nickrent 5323 atpB-rbcL intergenic spacer, partial sequence; and ribulose-1,5-bisphosphate carboxylase/oxygenase large subunit (rbcL) gene, partial cds; chloroplast.	Amico,G.C., Vidal-Russell,R., Garcia,M.A. and Nickrent,D.L.	Syst. Bot. 37 (1), 218-225 (2012)	Psittacantheae	Psittacanthinae	Tripodanthus	genomic DNA	Chloroplast	642	atpB-rbcL
Tripodanthus acutifolius	HM010454	Nickrent 5326	Tripodanthus acutifolius voucher Nickrent 5326 atpB-rbcL intergenic spacer, partial sequence; and ribulose-1,5-bisphosphate carboxylase/oxygenase large subunit (rbcL) gene, partial cds; chloroplast.	Amico,G.C., Vidal-Russell,R., Garcia,M.A. and Nickrent,D.L.	Syst. Bot. 37 (1), 218-225 (2012)	Psittacantheae	Psittacanthinae	Tripodanthus	genomic DNA	Chloroplast	521	atpB-rbcL
Tripodanthus acutifolius	HM010455	Nickrent 5330	Tripodanthus acutifolius voucher Nickrent 5330 atpB-rbcL intergenic spacer, partial sequence; and ribulose-1,5-bisphosphate carboxylase/oxygenase large subunit (rbcL) gene, partial cds; chloroplast.	Amico,G.C., Vidal-Russell,R., Garcia,M.A. and Nickrent,D.L.	Syst. Bot. 37 (1), 218-225 (2012)	Psittacantheae	Psittacanthinae	Tripodanthus	genomic DNA	Chloroplast	519	atpB-rbcL
Tripodanthus acutifolius	HM010456	Nickrent 5345	Tripodanthus acutifolius voucher Nickrent 5345 atpB-rbcL intergenic spacer, partial sequence; and ribulose-1,5-bisphosphate carboxylase/oxygenase large subunit (rbcL) gene, partial cds; chloroplast.	Amico,G.C., Vidal-Russell,R., Garcia,M.A. and Nickrent,D.L.	Syst. Bot. 37 (1), 218-225 (2012)	Psittacantheae	Psittacanthinae	Tripodanthus	genomic DNA	Chloroplast	508	atpB-rbcL
Tripodanthus acutifolius	HM010457	Nickrent 5346	Tripodanthus acutifolius voucher Nickrent 5346 atpB-rbcL intergenic spacer, partial sequence; and ribulose-1,5-bisphosphate carboxylase/oxygenase large subunit (rbcL) gene, partial cds; chloroplast.	Amico,G.C., Vidal-Russell,R., Garcia,M.A. and Nickrent,D.L.	Syst. Bot. 37 (1), 218-225 (2012)	Psittacantheae	Psittacanthinae	Tripodanthus	genomic DNA	Chloroplast	519	atpB-rbcL
Tripodanthus acutifolius	HM010458	Nickrent 5349	Tripodanthus acutifolius voucher Nickrent 5349 atpB-rbcL intergenic spacer, partial sequence; and ribulose-1,5-bisphosphate carboxylase/oxygenase large subunit (rbcL) gene, partial cds; chloroplast.	Amico,G.C., Vidal-Russell,R., Garcia,M.A. and Nickrent,D.L.	Syst. Bot. 37 (1), 218-225 (2012)	Psittacantheae	Psittacanthinae	Tripodanthus	genomic DNA	Chloroplast	527	atpB-rbcL
Tripodanthus acutifolius	HM010459	Nickrent 5350	Tripodanthus acutifolius voucher Nickrent 5350 atpB-rbcL intergenic spacer, partial sequence; and ribulose-1,5-bisphosphate carboxylase/oxygenase large subunit (rbcL) gene, partial cds; chloroplast.	Amico,G.C., Vidal-Russell,R., Garcia,M.A. and Nickrent,D.L.	Syst. Bot. 37 (1), 218-225 (2012)	Psittacantheae	Psittacanthinae	Tripodanthus	genomic DNA	Chloroplast	634	atpB-rbcL
Tripodanthus acutifolius	KP263323	Nickrent 2969	Tripodanthus acutifolius voucher Nickrent 2969 acetyl co-A carboxylase (accD) gene, partial cds; chloroplast.	Su,H.-J., Hu,J.-M., Anderson,F.E., Der,J. and Nickrent,D.L.	Taxon 64 (3), 491-506 (2015)	Psittacantheae	Psittacanthinae	Tripodanthus	genomic DNA	Chloroplast	1206	accD
Tripodanthus belmirensis	HM010406	Nickrent 5050	Tripodanthus belmirensis voucher Nickrent 5050 internal transcribed spacer 1, partial sequence; 5.8S ribosomal RNA gene and internal transcribed spacer 2, complete sequence; and 28S ribosomal RNA gene, partial sequence.	Amico,G.C., Vidal-Russell,R., Garcia,M.A. and Nickrent,D.L.	Syst. Bot. 37 (1), 218-225 (2012)	Psittacantheae	Psittacanthinae	Tripodanthus	genomic DNA	Nucleolus	692	ITS1; 5.8S; ITS2
Tripodanthus belmirensis	HM010427	Nickrent 5050	Tripodanthus belmirensis voucher Nickrent 5050 tRNA-Leu (trnL) gene, partial sequence; trnL-trnF intergenic spacer, complete sequence; and tRNA-Phe (trnF) gene, partial sequence; chloroplast.	Amico,G.C., Vidal-Russell,R., Garcia,M.A. and Nickrent,D.L.	Syst. Bot. 37 (1), 218-225 (2012)	Psittacantheae	Psittacanthinae	Tripodanthus	genomic DNA	Chloroplast	642	trnL/LF
Tripodanthus belmirensis	HM010449	Nickrent 5050	Tripodanthus belmirensis voucher Nickrent 5050 atpB-rbcL intergenic spacer, partial sequence; and ribulose-1,5-bisphosphate carboxylase/oxygenase large subunit (rbcL) gene, partial cds; chloroplast.	Amico,G.C., Vidal-Russell,R., Garcia,M.A. and Nickrent,D.L.	Syst. Bot. 37 (1), 218-225 (2012)	Psittacantheae	Psittacanthinae	Tripodanthus	genomic DNA	Chloroplast	312	atpB-rbcL
Tripodanthus flagellaris	DQ333863	Calvin and Wilson AR03-10	Tripodanthus flagellaris internal transcribed spacer 1, partial sequence; 5.8S ribosomal RNA gene, complete sequence; and internal transcribed spacer 2, partial sequence.	Wilson,C.A. and Calvin,C.L.	Am. J. Bot. 93 (5), 787-796 (2006)	Psittacantheae	Psittacanthinae	Tripodanthus	genomic DNA	Nucleolus	657	ITS1; 5.8S; ITS2
Tripodanthus flagellaris	DQ340614	Calvin and Wilson AR03-10	Tripodanthus flagellaris tRNA-Leu (trnL) gene and trnL-trnF intergenic spacer, partial sequence; chloroplast.	Wilson,C.A. and Calvin,C.L.	Am. J. Bot. 93 (5), 787-796 (2006)	Psittacantheae	Psittacanthinae	Tripodanthus	genomic DNA	Chloroplast	620	trnL/LF
Tripodanthus flagellaris	HM010407	Nickrent 5204	Tripodanthus flagellaris voucher Nickrent 5204 18S ribosomal RNA gene, partial sequence; internal transcribed spacer 1, 5.8S ribosomal RNA gene, and internal transcribed spacer 2, complete sequence; and 28S ribosomal RNA gene, partial sequence.	Amico,G.C., Vidal-Russell,R., Garcia,M.A. and Nickrent,D.L.	Syst. Bot. 37 (1), 218-225 (2012)	Psittacantheae	Psittacanthinae	Tripodanthus	genomic DNA	Nucleolus	719	ITS1; 5.8S; ITS2
Tripodanthus flagellaris	HM010408	Nickrent 5210	Tripodanthus flagellaris voucher Nickrent 5210 internal transcribed spacer 1, partial sequence; 5.8S ribosomal RNA gene and internal transcribed spacer 2, complete sequence; and 28S ribosomal RNA gene, partial sequence.	Amico,G.C., Vidal-Russell,R., Garcia,M.A. and Nickrent,D.L.	Syst. Bot. 37 (1), 218-225 (2012)	Psittacantheae	Psittacanthinae	Tripodanthus	genomic DNA	Nucleolus	680	ITS1; 5.8S; ITS2
Tripodanthus flagellaris	HM010409	Nickrent 5211	Tripodanthus flagellaris voucher Nickrent 5211 18S ribosomal RNA gene, partial sequence; internal transcribed spacer 1, 5.8S ribosomal RNA gene, and internal transcribed spacer 2, complete sequence; and 28S ribosomal RNA gene, partial sequence.	Amico,G.C., Vidal-Russell,R., Garcia,M.A. and Nickrent,D.L.	Syst. Bot. 37 (1), 218-225 (2012)	Psittacantheae	Psittacanthinae	Tripodanthus	genomic DNA	Nucleolus	714	ITS1; 5.8S; ITS2
Tripodanthus flagellaris	HM010420	Nickrent 5549	Tripodanthus flagellaris voucher Nickrent 5549 18S ribosomal RNA gene, partial sequence; internal transcribed spacer 1, 5.8S ribosomal RNA gene, and internal transcribed spacer 2, complete sequence; and 28S ribosomal RNA gene, partial sequence.	Amico,G.C., Vidal-Russell,R., Garcia,M.A. and Nickrent,D.L.	Syst. Bot. 37 (1), 218-225 (2012)	Psittacantheae	Psittacanthinae	Tripodanthus	genomic DNA	Nucleolus	715	ITS1; 5.8S; ITS2
Tripodanthus flagellaris	HM010423	Nickrent 5552	Tripodanthus flagellaris voucher Nickrent 5552 18S ribosomal RNA gene, partial sequence; internal transcribed spacer 1, 5.8S ribosomal RNA gene, and internal transcribed spacer 2, complete sequence; and 28S ribosomal RNA gene, partial sequence.	Amico,G.C., Vidal-Russell,R., Garcia,M.A. and Nickrent,D.L.	Syst. Bot. 37 (1), 218-225 (2012)	Psittacantheae	Psittacanthinae	Tripodanthus	genomic DNA	Nucleolus	688	ITS1; 5.8S; ITS2
Tripodanthus flagellaris	HM010424	Nickrent 5553	Tripodanthus flagellaris voucher Nickrent 5553 18S ribosomal RNA gene, partial sequence; internal transcribed spacer 1 and 5.8S ribosomal RNA gene, complete sequence; and internal transcribed spacer 2, partial sequence.	Amico,G.C., Vidal-Russell,R., Garcia,M.A. and Nickrent,D.L.	Syst. Bot. 37 (1), 218-225 (2012)	Psittacantheae	Psittacanthinae	Tripodanthus	genomic DNA	Nucleolus	683	ITS1; 5.8S; ITS2
Tripodanthus flagellaris	HM010428	Nickrent 5204	Tripodanthus flagellaris voucher Nickrent 5204 tRNA-Leu (trnL) gene, partial sequence; trnL-trnF intergenic spacer, complete sequence; and tRNA-Phe (trnF) gene, partial sequence; chloroplast.	Amico,G.C., Vidal-Russell,R., Garcia,M.A. and Nickrent,D.L.	Syst. Bot. 37 (1), 218-225 (2012)	Psittacantheae	Psittacanthinae	Tripodanthus	genomic DNA	Chloroplast	677	trnL/LF
Tripodanthus flagellaris	HM010429	Nickrent 5210	Tripodanthus flagellaris voucher Nickrent 5210 tRNA-Leu (trnL) gene, partial sequence; trnL-trnF intergenic spacer, complete sequence; and tRNA-Phe (trnF) gene, partial sequence; chloroplast.	Amico,G.C., Vidal-Russell,R., Garcia,M.A. and Nickrent,D.L.	Syst. Bot. 37 (1), 218-225 (2012)	Psittacantheae	Psittacanthinae	Tripodanthus	genomic DNA	Chloroplast	670	trnL/LF
Tripodanthus flagellaris	HM010430	Nickrent 5211	Tripodanthus flagellaris voucher Nickrent 5211 tRNA-Leu (trnL) gene, partial sequence; trnL-trnF intergenic spacer, complete sequence; and tRNA-Phe (trnF) gene, partial sequence; chloroplast.	Amico,G.C., Vidal-Russell,R., Garcia,M.A. and Nickrent,D.L.	Syst. Bot. 37 (1), 218-225 (2012)	Psittacantheae	Psittacanthinae	Tripodanthus	genomic DNA	Chloroplast	675	trnL/LF
Tripodanthus flagellaris	HM010442	Nickrent 5549	Tripodanthus flagellaris voucher Nickrent 5549 tRNA-Leu (trnL) gene, partial sequence; trnL-trnF intergenic spacer, complete sequence; and tRNA-Phe (trnF) gene, partial sequence; chloroplast.	Amico,G.C., Vidal-Russell,R., Garcia,M.A. and Nickrent,D.L.	Syst. Bot. 37 (1), 218-225 (2012)	Psittacantheae	Psittacanthinae	Tripodanthus	genomic DNA	Chloroplast	624	trnL/LF
Tripodanthus flagellaris	HM010445	Nickrent 5552	Tripodanthus flagellaris voucher Nickrent 5552 tRNA-Leu (trnL) gene, partial sequence; trnL-trnF intergenic spacer, complete sequence; and tRNA-Phe (trnF) gene, partial sequence; chloroplast.	Amico,G.C., Vidal-Russell,R., Garcia,M.A. and Nickrent,D.L.	Syst. Bot. 37 (1), 218-225 (2012)	Psittacantheae	Psittacanthinae	Tripodanthus	genomic DNA	Chloroplast	632	trnL/LF
Tripodanthus flagellaris	HM010446	Nickrent 5553	Tripodanthus flagellaris voucher Nickrent 5553 tRNA-Leu (trnL) gene, partial sequence; trnL-trnF intergenic spacer, complete sequence; and tRNA-Phe (trnF) gene, partial sequence; chloroplast.	Amico,G.C., Vidal-Russell,R., Garcia,M.A. and Nickrent,D.L.	Syst. Bot. 37 (1), 218-225 (2012)	Psittacantheae	Psittacanthinae	Tripodanthus	genomic DNA	Chloroplast	638	trnL/LF
Tripodanthus flagellaris	HM010450	Nickrent 5204	Tripodanthus flagellaris voucher Nickrent 5204 atpB-rbcL intergenic spacer, partial sequence; and ribulose-1,5-bisphosphate carboxylase/oxygenase large subunit (rbcL) gene, partial cds; chloroplast.	Amico,G.C., Vidal-Russell,R., Garcia,M.A. and Nickrent,D.L.	Syst. Bot. 37 (1), 218-225 (2012)	Psittacantheae	Psittacanthinae	Tripodanthus	genomic DNA	Chloroplast	644	atpB-rbcL
Tristerix aphyllus	DQ442941	G. Amico 97 (BRCU)	Tristerix aphyllus isolate FJ atpB gene and atpB-rbcL intergenic spacer, partial sequence; chloroplast.	Amico,G.C., Vidal-Russell,R. and Nickrent,D.L.	Am. J. Bot. 94 (4), 558-567 (2007)	Psittacantheae	Ligarinae	Tristerix	genomic DNA	Chloroplast	607	atpB-rbcL
Tristerix aphyllus	DQ442942	L. Suarez S/N (BRCU)	Tristerix aphyllus isolate CH atpB gene, partial sequence; atpB-rbcL intergenic spacer, complete sequence; and ribulose 1,5-bisphosphate carboxylase/oxygenase large subunit (rbcL) gene, partial cds; chloroplast.	Amico,G.C., Vidal-Russell,R. and Nickrent,D.L.	Am. J. Bot. 94 (4), 558-567 (2007)	Psittacantheae	Ligarinae	Tristerix	genomic DNA	Chloroplast	673	atpB-rbcL
Tristerix aphyllus	DQ442943	G. Amico 162 (BRCU)	Tristerix aphyllus isolate LS atpB gene, partial sequence; atpB-rbcL intergenic spacer, complete sequence; and ribulose 1,5-bisphosphate carboxylase/oxygenase large subunit (rbcL) gene, partial cds; chloroplast.	Amico,G.C., Vidal-Russell,R. and Nickrent,D.L.	Am. J. Bot. 94 (4), 558-567 (2007)	Psittacantheae	Ligarinae	Tristerix	genomic DNA	Chloroplast	675	atpB-rbcL
Tristerix aphyllus	DQ442944	G. Amico 166 (BRCU)	Tristerix aphyllus isolate LC atpB gene, partial sequence; atpB-rbcL intergenic spacer, complete sequence; and ribulose 1,5-bisphosphate carboxylase/oxygenase large subunit (rbcL) gene, partial cds; chloroplast.	Amico,G.C., Vidal-Russell,R. and Nickrent,D.L.	Am. J. Bot. 94 (4), 558-567 (2007)	Psittacantheae	Ligarinae	Tristerix	genomic DNA	Chloroplast	673	atpB-rbcL
Tristerix aphyllus	DQ442916	G. Amico 97 (BCRU)	Tristerix aphyllus isolate FJ tRNA-Leu (trnL) gene and trnL-trnF intergenic spacer, partial sequence; chloroplast.	Amico,G.C., Vidal-Russell,R. and Nickrent,D.L.	Am. J. Bot. 94 (4), 558-567 (2007)	Psittacantheae	Ligarinae	Tristerix	genomic DNA	Chloroplast	650	trnL/LF
Tristerix aphyllus	DQ442917	L. Suarez S/N (BCRU)	Tristerix aphyllus isolate CH tRNA-Leu (trnL) gene and trnL-trnF intergenic spacer, partial sequence; chloroplast.	Amico,G.C., Vidal-Russell,R. and Nickrent,D.L.	Am. J. Bot. 94 (4), 558-567 (2007)	Psittacantheae	Ligarinae	Tristerix	genomic DNA	Chloroplast	608	trnL/LF
Tristerix aphyllus	DQ442918	G. Amico 162 (BCRU)	Tristerix aphyllus isolate LS tRNA-Leu (trnL) gene and trnL-trnF intergenic spacer, partial sequence; chloroplast.	Amico,G.C., Vidal-Russell,R. and Nickrent,D.L.	Am. J. Bot. 94 (4), 558-567 (2007)	Psittacantheae	Ligarinae	Tristerix	genomic DNA	Chloroplast	662	trnL/LF
Tristerix aphyllus	DQ442919	G. Amico 166 (BCRU)	Tristerix aphyllus isolate LC tRNA-Leu (trnL) gene and trnL-trnF intergenic spacer, partial sequence; chloroplast.	Amico,G.C., Vidal-Russell,R. and Nickrent,D.L.	Am. J. Bot. 94 (4), 558-567 (2007)	Psittacantheae	Ligarinae	Tristerix	genomic DNA	Chloroplast	664	trnL/LF
Tristerix aphyllus	DQ442964	L. Suarez S/N (BRCU)	Tristerix aphyllus isolate CH 18S ribosomal RNA gene, partial sequence; internal transcribed spacer 1, 5.8S ribosomal RNA gene, and internal transcribed spacer 2, complete sequence; and 26S ribosomal RNA gene, partial sequence.	Amico,G.C., Vidal-Russell,R. and Nickrent,D.L.	Am. J. Bot. 94 (4), 558-567 (2007)	Psittacantheae	Ligarinae	Tristerix	genomic DNA	Nucleolus	754	ITS1; 5.8S; ITS2
Tristerix aphyllus	DQ442965	G. Amico 97 (BRCU)	Tristerix aphyllus isolate FJ internal transcribed spacer 1, partial sequence; 5.8S ribosomal RNA gene and internal transcribed spacer 2, complete sequence; and 26S ribosomal RNA gene, partial sequence.	Amico,G.C., Vidal-Russell,R. and Nickrent,D.L.	Am. J. Bot. 94 (4), 558-567 (2007)	Psittacantheae	Ligarinae	Tristerix	genomic DNA	Nucleolus	562	ITS1; 5.8S; ITS2
Tristerix aphyllus	DQ442966	G. Amico 166 (BRCU)	Tristerix aphyllus isolate LC internal transcribed spacer 1, partial sequence; 5.8S ribosomal RNA gene and internal transcribed spacer 2, complete sequence; and 26S ribosomal RNA gene, partial sequence.	Amico,G.C., Vidal-Russell,R. and Nickrent,D.L.	Am. J. Bot. 94 (4), 558-567 (2007)	Psittacantheae	Ligarinae	Tristerix	genomic DNA	Nucleolus	501	ITS1; 5.8S; ITS2
Tristerix chodatianus	DQ442953	D.N. Smith, Valencia, & Gonzales 9536 3337838 (MO)	Tristerix chodatianus isolate HU atpB gene, partial sequence; atpB-rbcL intergenic spacer, complete sequence; and ribulose 1,5-bisphosphate carboxylase/oxygenase large subunit (rbcL) gene, partial cds; chloroplast.	Amico,G.C., Vidal-Russell,R. and Nickrent,D.L.	Am. J. Bot. 94 (4), 558-567 (2007)	Psittacantheae	Ligarinae	Tristerix	genomic DNA	Chloroplast	594	atpB-rbcL
Tristerix chodatianus	DQ442938	D.N. Smith, Valencia, & Gonzales 9536 3337838 (MO)	Tristerix chodatianus isolate HU tRNA-Leu (trnL) gene and trnL-trnF intergenic spacer, partial sequence; chloroplast.	Amico,G.C., Vidal-Russell,R. and Nickrent,D.L.	Am. J. Bot. 94 (4), 558-567 (2007)	Psittacantheae	Ligarinae	Tristerix	genomic DNA	Chloroplast	638	trnL/LF
Tristerix chodatianus	DQ442976	D.N. Smith, Valencia, & Gonzales 9536 3337838 (MO)	Tristerix chodatianus isolate HU 18S ribosomal RNA gene, partial sequence; internal transcribed spacer 1, 5.8S ribosomal RNA gene, and internal transcribed spacer 2, complete sequence; and 26S ribosomal RNA gene, partial sequence.	Amico,G.C., Vidal-Russell,R. and Nickrent,D.L.	Am. J. Bot. 94 (4), 558-567 (2007)	Psittacantheae	Ligarinae	Tristerix	genomic DNA	Nucleolus	673	ITS1; 5.8S; ITS2
Tristerix corymbosus	DQ333854	Calvin and Wilson CL03-02	Tristerix corymbosus internal transcribed spacer 1, partial sequence; 5.8S ribosomal RNA gene, complete sequence; and internal transcribed spacer 2, partial sequence.	Wilson,C.A. and Calvin,C.L.	Am. J. Bot. 93 (5), 787-796 (2006)	Psittacantheae	Ligarinae	Tristerix	genomic DNA	Nucleolus	559	ITS1; 5.8S; ITS2
Tristerix corymbosus	DQ340605	Calvin and Wilson CL03-02	Tristerix corymbosus tRNA-Leu (trnL) gene and trnL-trnF intergenic spacer, partial sequence; chloroplast.	Wilson,C.A. and Calvin,C.L.	Am. J. Bot. 93 (5), 787-796 (2006)	Psittacantheae	Ligarinae	Tristerix	genomic DNA	Chloroplast	669	trnL/LF
Tristerix corymbosus	DQ442945	G. Amico 80 (BRCU)	Tristerix corymbosus isolate CH atpB gene, partial sequence; atpB-rbcL intergenic spacer, complete sequence; and ribulose 1,5-bisphosphate carboxylase/oxygenase large subunit (rbcL) gene, partial cds; chloroplast.	Amico,G.C., Vidal-Russell,R. and Nickrent,D.L.	Am. J. Bot. 94 (4), 558-567 (2007)	Psittacantheae	Ligarinae	Tristerix	genomic DNA	Chloroplast	661	atpB-rbcL
Tristerix corymbosus	DQ442946	G. Amico 83 (BRCU)	Tristerix corymbosus isolate TA atpB gene, partial sequence; atpB-rbcL intergenic spacer, complete sequence; and ribulose 1,5-bisphosphate carboxylase/oxygenase large subunit (rbcL) gene, partial cds; chloroplast.	Amico,G.C., Vidal-Russell,R. and Nickrent,D.L.	Am. J. Bot. 94 (4), 558-567 (2007)	Psittacantheae	Ligarinae	Tristerix	genomic DNA	Chloroplast	661	atpB-rbcL
Tristerix corymbosus	DQ442947	G. Amico 84 (BRCU)	Tristerix corymbosus isolate LL atpB gene and atpB-rbcL intergenic spacer, partial sequence; chloroplast.	Amico,G.C., Vidal-Russell,R. and Nickrent,D.L.	Am. J. Bot. 94 (4), 558-567 (2007)	Psittacantheae	Ligarinae	Tristerix	genomic DNA	Chloroplast	619	atpB-rbcL
Tristerix corymbosus	DQ442948	G. Amico 96 (BRCU)	Tristerix corymbosus isolate LI atpB gene, partial sequence; atpB-rbcL intergenic spacer, complete sequence; and ribulose 1,5-bisphosphate carboxylase/oxygenase large subunit (rbcL) gene, partial cds; chloroplast.	Amico,G.C., Vidal-Russell,R. and Nickrent,D.L.	Am. J. Bot. 94 (4), 558-567 (2007)	Psittacantheae	Ligarinae	Tristerix	genomic DNA	Chloroplast	673	atpB-rbcL
Tristerix corymbosus	DQ442920	G. Amico 80 (BCRU)	Tristerix corymbosus isolate CH tRNA-Leu (trnL) gene and trnL-trnF intergenic spacer, partial sequence; chloroplast.	Amico,G.C., Vidal-Russell,R. and Nickrent,D.L.	Am. J. Bot. 94 (4), 558-567 (2007)	Psittacantheae	Ligarinae	Tristerix	genomic DNA	Chloroplast	639	trnL/LF
Tristerix corymbosus	DQ442921	G. Amico 83 (BCRU)	Tristerix corymbosus isolate TA tRNA-Leu (trnL) gene and trnL-trnF intergenic spacer, partial sequence; chloroplast.	Amico,G.C., Vidal-Russell,R. and Nickrent,D.L.	Am. J. Bot. 94 (4), 558-567 (2007)	Psittacantheae	Ligarinae	Tristerix	genomic DNA	Chloroplast	645	trnL/LF
Tristerix corymbosus	DQ442922	G. Amico 84 (BCRU)	Tristerix corymbosus isolate LL tRNA-Leu (trnL) gene and trnL-trnF intergenic spacer, partial sequence; chloroplast.	Amico,G.C., Vidal-Russell,R. and Nickrent,D.L.	Am. J. Bot. 94 (4), 558-567 (2007)	Psittacantheae	Ligarinae	Tristerix	genomic DNA	Chloroplast	615	trnL/LF
Tristerix corymbosus	DQ442923	G. Amico 96 (BCRU)	Tristerix corymbosus isolate LI tRNA-Leu (trnL) gene and trnL-trnF intergenic spacer, partial sequence; chloroplast.	Amico,G.C., Vidal-Russell,R. and Nickrent,D.L.	Am. J. Bot. 94 (4), 558-567 (2007)	Psittacantheae	Ligarinae	Tristerix	genomic DNA	Chloroplast	640	trnL/LF
Tristerix corymbosus	DQ442967	G. Amico 80 (BRCU)	Tristerix corymbosus isolate CH internal transcribed spacer 1, partial sequence; 5.8S ribosomal RNA gene and internal transcribed spacer 2, complete sequence; and 26S ribosomal RNA gene, partial sequence.	Amico,G.C., Vidal-Russell,R. and Nickrent,D.L.	Am. J. Bot. 94 (4), 558-567 (2007)	Psittacantheae	Ligarinae	Tristerix	genomic DNA	Nucleolus	575	ITS1; 5.8S; ITS2
Tristerix corymbosus	DQ442968	G. Amico 83 (BRCU)	Tristerix corymbosus isolate TA internal transcribed spacer 1, partial sequence; 5.8S ribosomal RNA gene and internal transcribed spacer 2, complete sequence; and 26S ribosomal RNA gene, partial sequence.	Amico,G.C., Vidal-Russell,R. and Nickrent,D.L.	Am. J. Bot. 94 (4), 558-567 (2007)	Psittacantheae	Ligarinae	Tristerix	genomic DNA	Nucleolus	642	ITS1; 5.8S; ITS2
Tristerix corymbosus	DQ442969	G. Amico 84 (BRCU)	Tristerix corymbosus isolate LL internal transcribed spacer 1, partial sequence; 5.8S ribosomal RNA gene and internal transcribed spacer 2, complete sequence; and 26S ribosomal RNA gene, partial sequence.	Amico,G.C., Vidal-Russell,R. and Nickrent,D.L.	Am. J. Bot. 94 (4), 558-567 (2007)	Psittacantheae	Ligarinae	Tristerix	genomic DNA	Nucleolus	657	ITS1; 5.8S; ITS2
Tristerix corymbosus	DQ442970	G. Amico 96 (BRCU)	Tristerix corymbosus isolate LI internal transcribed spacer 1, partial sequence; 5.8S ribosomal RNA gene and internal transcribed spacer 2, complete sequence; and 26S ribosomal RNA gene, partial sequence.	Amico,G.C., Vidal-Russell,R. and Nickrent,D.L.	Am. J. Bot. 94 (4), 558-567 (2007)	Psittacantheae	Ligarinae	Tristerix	genomic DNA	Nucleolus	493	ITS1; 5.8S; ITS2
Tristerix corymbosus	EF050531	UNKNOWN	Tristerix corymbosus isolate HC4509Sm atpB-rbcL intergenic spacer, partial sequence; and ribulose-1,5-bisphosphate carboxylase/oxygenase large subunit (rbcL) gene, partial cds; chloroplast.	Amico,G.C. and Nickrent,D.L.	Am. J. Bot. 96 (8), 1571-1580 (2009)	Psittacantheae	Ligarinae	Tristerix	genomic DNA	Chloroplast	673	atpB-rbcL
Tristerix corymbosus	EF050532	UNKNOWN	Tristerix corymbosus isolate HD4605EN atpB-rbcL intergenic spacer, partial sequence; and ribulose-1,5-bisphosphate carboxylase/oxygenase large subunit (rbcL) gene, partial cds; chloroplast.	Amico,G.C. and Nickrent,D.L.	Am. J. Bot. 96 (8), 1571-1580 (2009)	Psittacantheae	Ligarinae	Tristerix	genomic DNA	Chloroplast	655	atpB-rbcL
Tristerix corymbosus	EF050533	UNKNOWN	Tristerix corymbosus isolate HE4507HU atpB-rbcL intergenic spacer, partial sequence; and ribulose-1,5-bisphosphate carboxylase/oxygenase large subunit (rbcL) gene, partial cds; chloroplast.	Amico,G.C. and Nickrent,D.L.	Am. J. Bot. 96 (8), 1571-1580 (2009)	Psittacantheae	Ligarinae	Tristerix	genomic DNA	Chloroplast	654	atpB-rbcL
Tristerix corymbosus	EF050534	UNKNOWN	Tristerix corymbosus isolate HF4599NB atpB-rbcL intergenic spacer, partial sequence; and ribulose-1,5-bisphosphate carboxylase/oxygenase large subunit (rbcL) gene, partial cds; chloroplast.	Amico,G.C. and Nickrent,D.L.	Am. J. Bot. 96 (8), 1571-1580 (2009)	Psittacantheae	Ligarinae	Tristerix	genomic DNA	Chloroplast	605	atpB-rbcL
Tristerix corymbosus	EF050535	UNKNOWN	Tristerix corymbosus isolate H64572FJ atpB-rbcL intergenic spacer, partial sequence; and ribulose-1,5-bisphosphate carboxylase/oxygenase large subunit (rbcL) gene, partial cds; chloroplast.	Amico,G.C. and Nickrent,D.L.	Am. J. Bot. 96 (8), 1571-1580 (2009)	Psittacantheae	Ligarinae	Tristerix	genomic DNA	Chloroplast	667	atpB-rbcL
Tristerix corymbosus	EF464467	Nickrent 4129	Tristerix corymbosus 18S ribosomal RNA gene, partial sequence.	Vidal-Russell,R. and Nickrent,D.L.	Mol. Phylogenet. Evol. 47 (2), 523-537 (2008)	Psittacantheae	Ligarinae	Tristerix	genomic DNA	Nucleolus	1648	18S
Tristerix corymbosus	EF464479	Nickrent 4572	Tristerix corymbosus 26S ribosomal RNA gene, partial sequence.	Vidal-Russell,R. and Nickrent,D.L.	Mol. Phylogenet. Evol. 47 (2), 523-537 (2008)	Psittacantheae	Ligarinae	Tristerix	genomic DNA	Nucleolus	875	25S
Tristerix corymbosus	EF464493	Nickrent 4597A	Tristerix corymbosus tRNA-Leu (trnL) gene, partial sequence; trnL-trnF intergenic spacer, complete sequence; and tRNA-Phe (trnF) gene, partial sequence; chloroplast.	Vidal-Russell,R. and Nickrent,D.L.	Mol. Phylogenet. Evol. 47 (2), 523-537 (2008)	Psittacantheae	Ligarinae	Tristerix	genomic DNA	Chloroplast	707	trnL/LF
Tristerix corymbosus	EF464530	Nickrent 4575E	Tristerix corymbosus ribulose-1,5-bisphosphate carboxylase/oxygenase large subunit (rbcL) gene, partial cds; chloroplast.	Vidal-Russell,R. and Nickrent,D.L.	Mol. Phylogenet. Evol. 47 (2), 523-537 (2008)	Psittacantheae	Ligarinae	Tristerix	genomic DNA	Chloroplast	732	rbcL
Tristerix corymbosus	EF464512	Nickrent 4129	Tristerix corymbosus maturase K (matK) gene, partial cds; chloroplast.	Vidal-Russell,R. and Nickrent,D.L.	Mol. Phylogenet. Evol. 47 (2), 523-537 (2008)	Psittacantheae	Ligarinae	Tristerix	genomic DNA	Chloroplast	1137	matK
Tristerix grandiflorus	DQ442930	Palacios, Neil, & Ceron 2547 3672311 (MO)	Tristerix grandiflorus isolate CO tRNA-Leu (trnL) gene and trnL-trnF intergenic spacer, partial sequence; chloroplast.	Amico,G.C., Vidal-Russell,R. and Nickrent,D.L.	Am. J. Bot. 94 (4), 558-567 (2007)	Psittacantheae	Ligarinae	Tristerix	genomic DNA	Chloroplast	638	trnL/LF
Tristerix grandiflorus	DQ442931	V. Zar 1368 3907304 (MO)	Tristerix grandiflorus isolate SJ tRNA-Leu (trnL) gene and trnL-trnF intergenic spacer, partial sequence; chloroplast.	Amico,G.C., Vidal-Russell,R. and Nickrent,D.L.	Am. J. Bot. 94 (4), 558-567 (2007)	Psittacantheae	Ligarinae	Tristerix	genomic DNA	Chloroplast	610	trnL/LF
Tristerix grandiflorus	DQ442978	V. Zar 1368 3907304 (MO)	Tristerix grandiflorus isolate SJ internal transcribed spacer 1, partial sequence; 5.8S ribosomal RNA gene and internal transcribed spacer 2, complete sequence; and 26S ribosomal RNA gene, partial sequence.	Amico,G.C., Vidal-Russell,R. and Nickrent,D.L.	Am. J. Bot. 94 (4), 558-567 (2007)	Psittacantheae	Ligarinae	Tristerix	genomic DNA	Nucleolus	652	ITS1; 5.8S; ITS2
Tristerix grandiflorus	DQ442979	Palacios, Neil, & Ceron 2547 3672311 (MO)	Tristerix grandiflorus isolate CO internal transcribed spacer 1, partial sequence; 5.8S ribosomal RNA gene and internal transcribed spacer 2, complete sequence; and 26S ribosomal RNA gene, partial sequence.	Amico,G.C., Vidal-Russell,R. and Nickrent,D.L.	Am. J. Bot. 94 (4), 558-567 (2007)	Psittacantheae	Ligarinae	Tristerix	genomic DNA	Nucleolus	648	ITS1; 5.8S; ITS2
Tristerix longebracteatus	DQ442954	D. Fernandez, M. Cerna & P. Villacres 371 5889268 (MO)	Tristerix longebracteatus isolate PI atpB gene, partial sequence; atpB-rbcL intergenic spacer, complete sequence; and ribulose 1,5-bisphosphate carboxylase/oxygenase large subunit (rbcL) gene, partial cds; chloroplast.	Amico,G.C., Vidal-Russell,R. and Nickrent,D.L.	Am. J. Bot. 94 (4), 558-567 (2007)	Psittacantheae	Ligarinae	Tristerix	genomic DNA	Chloroplast	645	atpB-rbcL
Tristerix longebracteatus	DQ442955	D.N. Smith 8288 722877 (MO)	Tristerix longebracteatus isolate CA atpB gene, partial sequence; atpB-rbcL intergenic spacer, complete sequence; and ribulose 1,5-bisphosphate carboxylase/oxygenase large subunit (rbcL) gene, partial cds; chloroplast.	Amico,G.C., Vidal-Russell,R. and Nickrent,D.L.	Am. J. Bot. 94 (4), 558-567 (2007)	Psittacantheae	Ligarinae	Tristerix	genomic DNA	Chloroplast	652	atpB-rbcL
Tristerix longebracteatus	DQ442932	D.N. Smith 8288 722877 (MO)	Tristerix longebracteatus isolate CA tRNA-Leu (trnL) gene and trnL-trnF intergenic spacer, partial sequence; chloroplast.	Amico,G.C., Vidal-Russell,R. and Nickrent,D.L.	Am. J. Bot. 94 (4), 558-567 (2007)	Psittacantheae	Ligarinae	Tristerix	genomic DNA	Chloroplast	610	trnL/LF
Tristerix longebracteatus	DQ442933	D. Fernandez, M. Cerna & P. Villacres 371 5889268 (MO)	Tristerix longebracteatus isolate PI tRNA-Leu (trnL) gene and trnL-trnF intergenic spacer, partial sequence; chloroplast.	Amico,G.C., Vidal-Russell,R. and Nickrent,D.L.	Am. J. Bot. 94 (4), 558-567 (2007)	Psittacantheae	Ligarinae	Tristerix	genomic DNA	Chloroplast	650	trnL/LF
Tristerix longebracteatus	DQ442980	D. Fernandez, M. Cerna & P. Villacres 371 5889268 (MO)	Tristerix longebracteatus isolate PI internal transcribed spacer 1, partial sequence; 5.8S ribosomal RNA gene and internal transcribed spacer 2, complete sequence; and 26S ribosomal RNA gene, partial sequence.	Amico,G.C., Vidal-Russell,R. and Nickrent,D.L.	Am. J. Bot. 94 (4), 558-567 (2007)	Psittacantheae	Ligarinae	Tristerix	genomic DNA	Nucleolus	657	ITS1; 5.8S; ITS2
Tristerix longebracteatus	DQ442981	D.N. Smith 8288 722877 (MO)	Tristerix longebracteatus isolate CA internal transcribed spacer 1, partial sequence; 5.8S ribosomal RNA gene and internal transcribed spacer 2, complete sequence; and 26S ribosomal RNA gene, partial sequence.	Amico,G.C., Vidal-Russell,R. and Nickrent,D.L.	Am. J. Bot. 94 (4), 558-567 (2007)	Psittacantheae	Ligarinae	Tristerix	genomic DNA	Nucleolus	666	ITS1; 5.8S; ITS2
Tristerix penduliflorus	DQ442956	M. Lewis 35236 4661844 (MO)	Tristerix penduliflorus isolate IN atpB gene, partial sequence; atpB-rbcL intergenic spacer, complete sequence; and ribulose 1,5-bisphosphate carboxylase/oxygenase large subunit (rbcL) gene, partial cds; chloroplast.	Amico,G.C., Vidal-Russell,R. and Nickrent,D.L.	Am. J. Bot. 94 (4), 558-567 (2007)	Psittacantheae	Ligarinae	Tristerix	genomic DNA	Chloroplast	653	atpB-rbcL
Tristerix penduliflorus	DQ442957	P. Nunez 8288 720879 (MO)	Tristerix penduliflorus isolate MA atpB gene, partial sequence; atpB-rbcL intergenic spacer, complete sequence; and ribulose 1,5-bisphosphate carboxylase/oxygenase large subunit (rbcL) gene, partial cds; chloroplast.	Amico,G.C., Vidal-Russell,R. and Nickrent,D.L.	Am. J. Bot. 94 (4), 558-567 (2007)	Psittacantheae	Ligarinae	Tristerix	genomic DNA	Chloroplast	659	atpB-rbcL
Tristerix penduliflorus	DQ442928	M. Lewis 35236 4661844 (MO)	Tristerix penduliflorus isolate IN tRNA-Leu (trnL) gene and trnL-trnF intergenic spacer, partial sequence; chloroplast.	Amico,G.C., Vidal-Russell,R. and Nickrent,D.L.	Am. J. Bot. 94 (4), 558-567 (2007)	Psittacantheae	Ligarinae	Tristerix	genomic DNA	Chloroplast	628	trnL/LF
Tristerix penduliflorus	DQ442929	P. Nunez 8288 720879 (MO)	Tristerix penduliflorus isolate MA tRNA-Leu (trnL) gene and trnL-trnF intergenic spacer, partial sequence; chloroplast.	Amico,G.C., Vidal-Russell,R. and Nickrent,D.L.	Am. J. Bot. 94 (4), 558-567 (2007)	Psittacantheae	Ligarinae	Tristerix	genomic DNA	Chloroplast	624	trnL/LF
Tristerix penduliflorus	DQ442975	M. Lewis 35236 4661844 (MO)	Tristerix penduliflorus isolate IN internal transcribed spacer 2 and 26S ribosomal RNA gene, partial sequence.	Amico,G.C., Vidal-Russell,R. and Nickrent,D.L.	Am. J. Bot. 94 (4), 558-567 (2007)	Psittacantheae	Ligarinae	Tristerix	genomic DNA	Nucleolus	197	ITS1; 5.8S; ITS2
Tristerix peruvianus	DQ442958	D.N. Smith & M. Buddensiek 10858 3307944 (MO)	Tristerix peruvianus isolate HU atpB gene, partial sequence; atpB-rbcL intergenic spacer, complete sequence; and ribulose 1,5-bisphosphate carboxylase/oxygenase large subunit (rbcL) gene, partial cds; chloroplast.	Amico,G.C., Vidal-Russell,R. and Nickrent,D.L.	Am. J. Bot. 94 (4), 558-567 (2007)	Psittacantheae	Ligarinae	Tristerix	genomic DNA	Chloroplast	633	atpB-rbcL
Tristerix peruvianus	DQ442934	D.N. Smith & M. Buddensiek 10858 3307944 (MO)	Tristerix peruvianus isolate HU tRNA-Leu (trnL) gene and trnL-trnF intergenic spacer, partial sequence; chloroplast.	Amico,G.C., Vidal-Russell,R. and Nickrent,D.L.	Am. J. Bot. 94 (4), 558-567 (2007)	Psittacantheae	Ligarinae	Tristerix	genomic DNA	Chloroplast	648	trnL/LF
Tristerix peruvianus	DQ442977	D.N. Smith & M. Buddensiek 10858 3307944 (MO)	Tristerix peruvianus isolate HU internal transcribed spacer 1, partial sequence; 5.8S ribosomal RNA gene and internal transcribed spacer 2, complete sequence; and 26S ribosomal RNA gene, partial sequence.	Amico,G.C., Vidal-Russell,R. and Nickrent,D.L.	Am. J. Bot. 94 (4), 558-567 (2007)	Psittacantheae	Ligarinae	Tristerix	genomic DNA	Nucleolus	653	ITS1; 5.8S; ITS2
Tristerix peytonii	DQ442959	P. Nunez & J. Arque 8287 3632650 (MO)	Tristerix peytonii isolate CZ atpB gene, partial sequence; atpB-rbcL intergenic spacer, complete sequence; and ribulose 1,5-bisphosphate carboxylase/oxygenase large subunit (rbcL) gene, partial cds; chloroplast.	Amico,G.C., Vidal-Russell,R. and Nickrent,D.L.	Am. J. Bot. 94 (4), 558-567 (2007)	Psittacantheae	Ligarinae	Tristerix	genomic DNA	Chloroplast	611	atpB-rbcL
Tristerix peytonii	DQ442935	P. Nunez & J. Arque 8287 3632650 (MO)	Tristerix peytonii isolate CZ tRNA-Leu (trnL) gene and trnL-trnF intergenic spacer, partial sequence; chloroplast.	Amico,G.C., Vidal-Russell,R. and Nickrent,D.L.	Am. J. Bot. 94 (4), 558-567 (2007)	Psittacantheae	Ligarinae	Tristerix	genomic DNA	Chloroplast	479	trnL/LF
Tristerix peytonii	DQ442982	P. Nunez & J. Arque 8287 3632650 (MO)	Tristerix peytonii isolate CZ internal transcribed spacer 1, partial sequence; 5.8S ribosomal RNA gene and internal transcribed spacer 2, complete sequence; and 26S ribosomal RNA gene, partial sequence.	Amico,G.C., Vidal-Russell,R. and Nickrent,D.L.	Am. J. Bot. 94 (4), 558-567 (2007)	Psittacantheae	Ligarinae	Tristerix	genomic DNA	Nucleolus	404	ITS1; 5.8S; ITS2
Tristerix pubescens	DQ442960	D.N. Smith & M. Buddensiek 11090 3303268 (MO)	Tristerix pubescens isolate HU atpB gene, partial sequence; atpB-rbcL intergenic spacer, complete sequence; and ribulose 1,5-bisphosphate carboxylase/oxygenase large subunit (rbcL) gene, partial cds; chloroplast.	Amico,G.C., Vidal-Russell,R. and Nickrent,D.L.	Am. J. Bot. 94 (4), 558-567 (2007)	Psittacantheae	Ligarinae	Tristerix	genomic DNA	Chloroplast	580	atpB-rbcL
Tristerix pubescens	DQ442961	D.N. Smith 11388 3337809 (MO)	Tristerix pubescens isolate HU2 atpB gene, partial sequence; atpB-rbcL intergenic spacer, complete sequence; and ribulose 1,5-bisphosphate carboxylase/oxygenase large subunit (rbcL) gene, partial cds; chloroplast.	Amico,G.C., Vidal-Russell,R. and Nickrent,D.L.	Am. J. Bot. 94 (4), 558-567 (2007)	Psittacantheae	Ligarinae	Tristerix	genomic DNA	Chloroplast	573	atpB-rbcL
Tristerix pubescens	DQ442936	D.N. Smith & M. Buddensiek 11090 3303268 (MO)	Tristerix pubescens isolate HU tRNA-Leu (trnL) gene and trnL-trnF intergenic spacer, partial sequence; chloroplast.	Amico,G.C., Vidal-Russell,R. and Nickrent,D.L.	Am. J. Bot. 94 (4), 558-567 (2007)	Psittacantheae	Ligarinae	Tristerix	genomic DNA	Chloroplast	640	trnL/LF
Tristerix pubescens	DQ442937	D.N. Smith 11388 3337809 (MO)	Tristerix pubescens isolate HU2 tRNA-Leu (trnL) gene and trnL-trnF intergenic spacer, partial sequence; chloroplast.	Amico,G.C., Vidal-Russell,R. and Nickrent,D.L.	Am. J. Bot. 94 (4), 558-567 (2007)	Psittacantheae	Ligarinae	Tristerix	genomic DNA	Chloroplast	630	trnL/LF
Tristerix pubescens	DQ442983	D.N. Smith & M. Buddensiek 11090 3303268 (MO)	Tristerix pubescens isolate HU internal transcribed spacer 1, partial sequence; 5.8S ribosomal RNA gene and internal transcribed spacer 2, complete sequence; and 26S ribosomal RNA gene, partial sequence.	Amico,G.C., Vidal-Russell,R. and Nickrent,D.L.	Am. J. Bot. 94 (4), 558-567 (2007)	Psittacantheae	Ligarinae	Tristerix	genomic DNA	Nucleolus	535	ITS1; 5.8S; ITS2
Tristerix pubescens	DQ442984	D.N. Smith 11388 3337809 (MO)	Tristerix pubescens isolate HU2 18S ribosomal RNA gene, partial sequence; internal transcribed spacer 1, 5.8S ribosomal RNA gene, and internal transcribed spacer 2, complete sequence; and 26S ribosomal RNA gene, partial sequence.	Amico,G.C., Vidal-Russell,R. and Nickrent,D.L.	Am. J. Bot. 94 (4), 558-567 (2007)	Psittacantheae	Ligarinae	Tristerix	genomic DNA	Nucleolus	672	ITS1; 5.8S; ITS2
Tristerix verticillatus	DQ442949	G. Amico 154 (BRCU)	Tristerix verticillatus isolate AN atpB gene and atpB-rbcL intergenic spacer, partial sequence; chloroplast.	Amico,G.C., Vidal-Russell,R. and Nickrent,D.L.	Am. J. Bot. 94 (4), 558-567 (2007)	Psittacantheae	Ligarinae	Tristerix	genomic DNA	Chloroplast	615	atpB-rbcL
Tristerix verticillatus	DQ442950	G. Amico 157 (BRCU)	Tristerix verticillatus isolate CM atpB gene, partial sequence; atpB-rbcL intergenic spacer, complete sequence; and ribulose 1,5-bisphosphate carboxylase/oxygenase large subunit (rbcL) gene, partial cds; chloroplast.	Amico,G.C., Vidal-Russell,R. and Nickrent,D.L.	Am. J. Bot. 94 (4), 558-567 (2007)	Psittacantheae	Ligarinae	Tristerix	genomic DNA	Chloroplast	628	atpB-rbcL
Tristerix verticillatus	DQ442951	G. Amico 158 (BRCU)	Tristerix verticillatus isolate GV atpB gene, partial sequence; atpB-rbcL intergenic spacer, complete sequence; and ribulose 1,5-bisphosphate carboxylase/oxygenase large subunit (rbcL) gene, partial cds; chloroplast.	Amico,G.C., Vidal-Russell,R. and Nickrent,D.L.	Am. J. Bot. 94 (4), 558-567 (2007)	Psittacantheae	Ligarinae	Tristerix	genomic DNA	Chloroplast	627	atpB-rbcL
Tristerix verticillatus	DQ442952	G. Amico 155 (BRCU)	Tristerix verticillatus isolate PO atpB gene, partial sequence; atpB-rbcL intergenic spacer, complete sequence; and ribulose 1,5-bisphosphate carboxylase/oxygenase large subunit (rbcL) gene, partial cds; chloroplast.	Amico,G.C., Vidal-Russell,R. and Nickrent,D.L.	Am. J. Bot. 94 (4), 558-567 (2007)	Psittacantheae	Ligarinae	Tristerix	genomic DNA	Chloroplast	626	atpB-rbcL
Tristerix verticillatus	DQ442924	G. Amico 154 (BCRU)	Tristerix verticillatus isolate AN tRNA-Leu (trnL) gene and trnL-trnF intergenic spacer, partial sequence; chloroplast.	Amico,G.C., Vidal-Russell,R. and Nickrent,D.L.	Am. J. Bot. 94 (4), 558-567 (2007)	Psittacantheae	Ligarinae	Tristerix	genomic DNA	Chloroplast	671	trnL/LF
Tristerix verticillatus	DQ442925	G. Amico 157 (BCRU)	Tristerix verticillatus isolate CM tRNA-Leu (trnL) gene and trnL-trnF intergenic spacer, partial sequence; chloroplast.	Amico,G.C., Vidal-Russell,R. and Nickrent,D.L.	Am. J. Bot. 94 (4), 558-567 (2007)	Psittacantheae	Ligarinae	Tristerix	genomic DNA	Chloroplast	626	trnL/LF
Tristerix verticillatus	DQ442926	G. Amico 158 (BCRU)	Tristerix verticillatus isolate GV tRNA-Leu (trnL) gene and trnL-trnF intergenic spacer, partial sequence; chloroplast.	Amico,G.C., Vidal-Russell,R. and Nickrent,D.L.	Am. J. Bot. 94 (4), 558-567 (2007)	Psittacantheae	Ligarinae	Tristerix	genomic DNA	Chloroplast	671	trnL/LF
Tristerix verticillatus	DQ442927	G. Amico 155 (BCRU)	Tristerix verticillatus isolate PO tRNA-Leu (trnL) gene and trnL-trnF intergenic spacer, partial sequence; chloroplast.	Amico,G.C., Vidal-Russell,R. and Nickrent,D.L.	Am. J. Bot. 94 (4), 558-567 (2007)	Psittacantheae	Ligarinae	Tristerix	genomic DNA	Chloroplast	664	trnL/LF
Tristerix verticillatus	DQ442971	G. Amico 157 (BRCU)	Tristerix verticillatus isolate CM internal transcribed spacer 1, partial sequence; 5.8S ribosomal RNA gene and internal transcribed spacer 2, complete sequence; and 26S ribosomal RNA gene, partial sequence.	Amico,G.C., Vidal-Russell,R. and Nickrent,D.L.	Am. J. Bot. 94 (4), 558-567 (2007)	Psittacantheae	Ligarinae	Tristerix	genomic DNA	Nucleolus	666	ITS1; 5.8S; ITS2
Tristerix verticillatus	DQ442972	G. Amico 158 (BRCU)	Tristerix verticillatus isolate GV internal transcribed spacer 1, partial sequence; 5.8S ribosomal RNA gene and internal transcribed spacer 2, complete sequence; and 26S ribosomal RNA gene, partial sequence.	Amico,G.C., Vidal-Russell,R. and Nickrent,D.L.	Am. J. Bot. 94 (4), 558-567 (2007)	Psittacantheae	Ligarinae	Tristerix	genomic DNA	Nucleolus	658	ITS1; 5.8S; ITS2
Tristerix verticillatus	DQ442973	G. Amico 155 (BRCU)	Tristerix verticillatus isolate PO internal transcribed spacer 1, partial sequence; 5.8S ribosomal RNA gene and internal transcribed spacer 2, complete sequence; and 26S ribosomal RNA gene, partial sequence.	Amico,G.C., Vidal-Russell,R. and Nickrent,D.L.	Am. J. Bot. 94 (4), 558-567 (2007)	Psittacantheae	Ligarinae	Tristerix	genomic DNA	Nucleolus	644	ITS1; 5.8S; ITS2
Tristerix verticillatus	DQ442974	G. Amico 154 (BRCU)	Tristerix verticillatus isolate AN internal transcribed spacer 1, partial sequence; 5.8S ribosomal RNA gene and internal transcribed spacer 2, complete sequence; and 26S ribosomal RNA gene, partial sequence.	Amico,G.C., Vidal-Russell,R. and Nickrent,D.L.	Am. J. Bot. 94 (4), 558-567 (2007)	Psittacantheae	Ligarinae	Tristerix	genomic DNA	Nucleolus	666	ITS1; 5.8S; ITS2
Tupeia antarctica	L24425	UNKNOWN	Tupeia antarctica (Forst. f.) Chamb. and Schlecht. 18S ribosomal RNA gene, partial sequence.	Nickrent,D.L. and Duff,R.J.	(in) Moreno,M.T., Cubero,J.I., Berner,D., Joel,D., Musselman,L.J.	Psittacantheae	Tupeinae	Tupeia	genomic DNA	Nucleolus	1761	18S
Tupeia antarctica	DQ333850	Calvin and Wilson NZ98-02	Tupeia antarctica internal transcribed spacer 1, partial sequence; 5.8S ribosomal RNA gene, complete sequence; and internal transcribed spacer 2, partial sequence.	Wilson,C.A. and Calvin,C.L.	Am. J. Bot. 93 (5), 787-796 (2006)	Psittacantheae	Tupeinae	Tupeia	genomic DNA	Nucleolus	662	ITS1; 5.8S; ITS2
Tupeia antarctica	DQ340601	Calvin and Wilson NZ98-02	Tupeia antarctica tRNA-Leu (trnL) gene and trnL-trnF intergenic spacer, partial sequence; chloroplast.	Wilson,C.A. and Calvin,C.L.	Am. J. Bot. 93 (5), 787-796 (2006)	Psittacantheae	Tupeinae	Tupeia	genomic DNA	Chloroplast	628	trnL/LF
Tupeia antarctica	DQ790133	D. Nickrent 2742	Tupeia antarctica voucher D. Nickrent 2742 ribulose-1,5-bisphosphate carboxylase/oxygenase large subunit (rbcL) gene, partial cds; chloroplast.	Malecot,V. and Nickrent,D.L.	Syst. Bot. 33 (1), 97-106 (2008)	Psittacantheae	Tupeinae	Tupeia	genomic DNA	Chloroplast	1387	rbcL
Tupeia antarctica	DQ790172	D. Nickrent 2742	Tupeia antarctica voucher D. Nickrent 2742 maturase K (matK) gene, partial cds; chloroplast.	Malecot,V. and Nickrent,D.L.	Syst. Bot. 33 (1), 97-106 (2008)	Psittacantheae	Tupeinae	Tupeia	genomic DNA	Chloroplast	1255	matK
Tupeia antarctica	DQ790208	D. Nickrent 2742	Tupeia antarctica 26S ribosomal RNA gene gene, partial sequence.	Vidal-Russell,R. and Nickrent,D.L.	Mol. Phylogenet. Evol. 47 (2), 523-537 (2008)	Psittacantheae	Tupeinae	Tupeia	genomic DNA	Nucleolus	900	25S
Tupeia antarctica	EF464494	Nickrent 2742	Tupeia antarctica tRNA-Leu (trnL) gene, partial sequence; trnL-trnF intergenic spacer, complete sequence; and tRNA-Phe (trnF) gene, partial sequence; chloroplast.	Vidal-Russell,R. and Nickrent,D.L.	Mol. Phylogenet. Evol. 47 (2), 523-537 (2008)	Psittacantheae	Tupeinae	Tupeia	genomic DNA	Chloroplast	587	trnL/LF
Vanwykia remota	EU544351	Nickrent 4331	Vanwykia remota voucher Nickrent 4331 small subunit ribosomal RNA gene, partial sequence.	Vidal-Russell,R. and Nickrent,D.L.	Am. J. Bot. 95 (8), 1015-1029 (2008)	Lorantheae	Tapinanthinae	Vanwykia	genomic DNA	Nucleolus	1716	18S
Vanwykia remota	EU544407	Nickrent 4331	Vanwykia remota voucher Nickrent 4331 26S ribosomal RNA gene, partial sequence.	Vidal-Russell,R. and Nickrent,D.L.	Am. J. Bot. 95 (8), 1015-1029 (2008)	Lorantheae	Tapinanthinae	Vanwykia	genomic DNA	Nucleolus	2078	25S
Vanwykia remota	EU544463	Nickrent 4331	Vanwykia remota voucher Nickrent 4331 maturase K (matK) gene, partial cds; chloroplast.	Vidal-Russell,R. and Nickrent,D.L.	Am. J. Bot. 95 (8), 1015-1029 (2008)	Lorantheae	Tapinanthinae	Vanwykia	genomic DNA	Chloroplast	1381	matK
Vanwykia remota	EU544514	Nickrent 4331	Vanwykia remota voucher Nickrent 4331 tRNA-Leu (trnL) gene, partial sequence; trnL-trnF intergenic spacer, complete sequence; and tRNA-Phe (trnF) gene, partial sequence; chloroplast.	Vidal-Russell,R. and Nickrent,D.L.	Am. J. Bot. 95 (8), 1015-1029 (2008)	Lorantheae	Tapinanthinae	Vanwykia	genomic DNA	Chloroplast	593	trnL/LF
	Sequences in gene banks per April, 16th, 2016, not included in our original harvest
