# Supplementary material for: Eocene Loranthaceae pollen pushes back divergence ages for major splits in the family
Source: PeerJ. 2017 Jun 7;5:e3373. doi: 10.7717/peerj.3373 (PMC5466002; doi:10.7717/peerj.3373)
Supplement: Supplemental Information 6 — List of families infested by different loranth species compiled from various literature sources. [file peerj-05-3373-s006.xlsx]

## Sheet: Hosts
File S6. Host specifity of loranths, compiled from various literature sources
Genus	Species	Ref(s).	Area	Number of infested families	Adoxaceae	Altingiaceae	Amaranthaceae	Anacardiaceae	Annonaceae	Apocynaceae	Aquifoliaceae	Araliaceae	Argophyllaceae	Asteraceae	Betulaceae	Berberidaceae	Bignoniaceae	Bixaceae	Bombacaceae	Boraginaceae	Burseraceae	Cactaceae	Calophyllaceae	Calycanthaceae	Cannabaceae	Capparaceae	Caprifoliaceae	Caryocaraceae	Casuarinaceae	Celastraceae	Chrysobalanaceae	Clethraceae	Clusiaceae	Combretaceae	Connaraceae	Coriariaceae	Cornaceae	Cunoniaceae	Daphniphyllaceae	Dilleniaceae	Dipterocarpaceae	Ebenaceae	Elaeagnaceae	Elaeocarpaceae	Ericaceae	Erythroxylaceae	Escalloniaceae	Euphorbiaceae	Eupomatiaceae
Alepis	flavida	de Lange et al., 1995; Norton & de Lange 1999	AAP: New Zealand	6	0	0	0	0	0	0	0	1	0	0	0	0	0	0	0	0	0	0	0	0	0	0	0	0	0	0	0	0	0	0	0	0	0	0	0	0	0	0	0	1	1	0	0	0	0
Amyema	benthamii	Downey 1998	AAP: Australia	17	0	0	0	1	0	1	0	0	0	0	0	0	0	0	0	0	0	0	0	0	0	0	0	0	0	1	0	0	0	1	0	0	0	0	0	0	0	0	0	0	0	0	0	1	0
Amyema	bifurcata	Downey 1998	AAP: Australia	3	0	0	0	0	0	0	0	0	0	0	0	0	0	0	0	0	0	0	0	0	0	0	0	0	0	0	0	0	0	0	0	0	0	0	0	0	0	0	0	0	0	0	0	0	0
Amyema	biniflora	Downey 1998	AAP: Australia	1	0	0	0	0	0	0	0	0	0	0	0	0	0	0	0	0	0	0	0	0	0	0	0	0	0	0	0	0	0	0	0	0	0	0	0	0	0	0	0	0	0	0	0	0	0
Amyema	cambagei	Downey 1998	AAP: Australia	5	0	0	0	0	0	0	0	0	0	0	0	0	0	0	0	0	0	0	0	0	0	0	0	0	1	0	0	0	0	0	0	0	0	0	0	0	0	0	0	0	0	0	0	0	0
Amyema	congener	Downey 1998	AAP: Australia	29	0	0	0	0	0	1	0	1	0	0	0	0	0	0	0	0	0	0	0	0	0	1	0	0	1	1	0	0	0	1	0	0	0	0	0	0	0	0	0	0	0	1	0	1	0
Amyema	conspicua	Downey 1998	AAP: Australia	18	0	0	0	0	0	1	0	0	0	0	0	0	0	0	0	0	0	0	0	0	0	1	0	0	1	0	0	0	0	1	0	0	0	0	0	0	0	0	0	0	0	1	0	1	0
Amyema	dolichopoda	Downey 1998	AAP: Australia	3	0	0	0	0	0	0	0	0	0	0	0	0	0	0	0	0	0	0	0	0	0	0	0	0	0	0	0	0	0	1	0	0	0	0	0	0	0	0	0	0	0	0	0	0	0
Amyema	eburna	Downey 1998	AAP: Australia	1	0	0	0	0	0	0	0	0	0	0	0	0	0	0	0	0	0	0	0	0	0	0	0	0	0	0	0	0	0	0	0	0	0	0	0	0	0	0	0	0	0	0	0	0	0
Amyema	fitzgeraldii	Downey 1998	AAP: Australia	1	0	0	0	0	0	0	0	0	0	0	0	0	0	0	0	0	0	0	0	0	0	0	0	0	0	0	0	0	0	0	0	0	0	0	0	0	0	0	0	0	0	0	0	0	0
Amyema	friesiana	Downey 1998	AAP: Australia	[no data]	?	?	?	?	?	?	?	?	?	?	?	?	?	?	?	?	?	?	?	?	?	?	?	?	?	?	?	?	?	?	?	?	?	?	?	?	?	?	?	?	?	?	?	?	?
Amyema	gaudichaudii	Downey 1998	AAP: Australia	2	0	0	0	0	0	0	0	0	0	0	0	0	0	0	0	0	0	0	0	0	0	0	0	0	0	0	0	0	0	0	0	0	0	0	0	0	0	0	0	0	0	0	0	0	0
Amyema	gibberula	Downey 1998	AAP: Australia	4	0	0	0	0	0	0	0	0	0	0	0	0	0	0	0	0	0	0	0	0	0	0	0	0	1	0	0	0	0	0	0	0	0	0	0	0	0	0	0	0	0	0	0	0	0
Amyema	glabra	Downey 1998	AAP: Australia	6	0	0	0	0	0	0	0	0	0	0	0	0	0	0	0	0	0	0	0	0	0	0	0	0	0	0	0	0	0	0	0	0	0	0	0	0	0	0	0	0	0	0	0	0	0
Amyema	haematodes	Downey 1998	AAP: Australia	4	0	0	0	0	0	0	0	0	0	0	0	0	0	0	0	0	0	0	0	0	0	0	0	0	0	0	0	0	0	0	0	0	0	0	0	0	0	0	0	0	0	0	0	1	0
Amyema	herbertiana	Downey 1998	AAP: Australia	1	0	0	0	0	0	0	0	0	0	0	0	0	0	0	0	0	0	0	0	0	0	0	0	0	0	0	0	0	0	0	0	0	0	0	0	0	0	0	0	0	0	0	0	0	0
Amyema	hilliana	Downey 1998	AAP: Australia	1	0	0	0	0	0	0	0	0	0	0	0	0	0	0	0	0	0	0	0	0	0	0	0	0	0	0	0	0	0	0	0	0	0	0	0	0	0	0	0	0	0	0	0	0	0
Amyema	linophylla	Downey 1998	AAP: Australia	4	0	0	0	0	0	0	0	0	0	0	0	0	0	0	0	0	0	0	0	0	0	0	0	0	1	0	0	0	0	0	0	0	0	0	0	0	0	0	0	0	0	0	0	0	0
Amyema	lucasii	Downey 1998	AAP: Australia	3	0	0	0	0	0	0	0	0	0	0	0	0	0	0	0	0	0	0	0	0	0	1	0	0	0	0	0	0	0	0	0	0	0	0	0	0	0	0	0	0	0	0	0	0	0
Amyema	mackayense	Downey 1998	AAP: Australia	9	0	0	0	0	0	0	0	0	0	0	0	0	0	0	1	0	0	0	0	0	0	0	0	0	0	0	0	0	0	1	0	0	0	0	0	0	0	0	0	0	0	0	0	1	0
Amyema	maidenii	Downey 1998	AAP: Australia	8	0	0	0	0	0	1	0	0	0	0	0	0	0	0	0	0	0	0	0	0	0	0	0	0	1	0	0	0	0	0	0	0	0	0	0	0	0	0	0	0	0	0	0	0	0
Amyema	melaleucae	Downey 1998	AAP: Australia	5	0	0	0	0	0	0	0	0	0	0	0	0	0	0	0	0	0	0	0	0	0	0	0	0	1	0	0	0	0	0	0	0	0	0	0	0	0	0	0	0	0	0	0	0	0
Amyema	microphylla	Downey 1998	AAP: Australia	1	0	0	0	0	0	0	0	0	0	0	0	0	0	0	0	0	0	0	0	0	0	0	0	0	0	0	0	0	0	0	0	0	0	0	0	0	0	0	0	0	0	0	0	0	0
Amyema	miquelii	Downey 1998	AAP: Australia	10	0	0	0	0	0	0	0	0	0	0	0	0	0	0	0	0	0	0	0	0	0	0	0	0	1	0	0	0	0	0	0	0	0	0	0	0	0	0	0	0	0	0	0	1	0
Amyema	miraculosa	Downey 1998	AAP: Australia	13	0	0	0	0	0	0	0	0	0	0	0	0	0	0	0	0	0	0	0	0	0	0	0	0	1	0	0	0	0	0	0	0	0	0	0	0	0	0	0	0	0	0	0	0	0
Amyema	nestor	Downey 1998	AAP: Australia	2	0	0	0	0	0	0	0	0	0	0	0	0	0	0	0	0	0	0	0	0	0	0	0	0	0	0	0	0	0	0	0	0	0	0	0	0	0	0	0	0	0	0	0	0	0
Amyema	pendula	Downey 1998	AAP: Australia	6	0	0	0	0	0	0	0	0	0	0	0	0	0	0	0	0	0	0	0	0	0	0	0	0	1	1	0	0	0	0	0	0	0	0	0	0	0	0	0	0	0	0	0	0	0
Amyema	plicatula	Downey 1998	AAP: Australia	1	0	0	0	0	0	0	0	0	0	0	0	0	0	0	0	0	0	0	0	0	0	0	0	0	0	0	0	0	0	0	0	0	0	0	0	0	0	0	0	0	0	0	0	0	0
Amyema	preisii	Downey 1998	AAP: Australia	9	0	0	0	0	0	0	0	0	0	0	0	0	0	0	0	0	0	0	0	0	0	0	0	0	1	0	0	0	0	0	0	0	0	0	0	0	0	0	0	0	0	0	0	0	0
Amyema	pyriforme	Downey 1998	AAP: Australia	1	0	0	0	0	0	0	0	0	0	0	0	0	0	0	0	0	0	0	0	0	0	0	0	0	0	0	0	0	0	0	0	0	0	0	0	0	0	0	0	0	0	0	0	0	0
Amyema	quandang	Downey 1998	AAP: Australia	11	0	0	0	0	0	1	0	0	0	0	0	0	0	0	0	0	0	0	0	0	0	0	0	0	1	0	0	0	0	0	0	0	0	0	0	0	0	0	0	0	0	0	0	1	0
Amyema	quaternifolia	Downey 1998	AAP: Australia	[no data]	?	?	?	?	?	?	?	?	?	?	?	?	?	?	?	?	?	?	?	?	?	?	?	?	?	?	?	?	?	?	?	?	?	?	?	?	?	?	?	?	?	?	?	?	?
Amyema	queenslandica	Downey 1998	AAP: Australia	10	0	0	0	0	0	0	0	0	0	0	0	0	0	0	0	0	1	0	0	0	0	0	0	0	0	0	0	0	0	0	0	0	0	0	0	0	0	0	0	1	0	0	0	0	0
Amyema	sanguinea	Downey 1998	AAP: Australia	3	0	0	0	0	0	0	0	0	0	0	0	0	0	0	0	0	0	0	0	0	0	0	0	0	0	0	0	0	0	0	0	0	0	0	0	0	0	0	0	0	0	0	0	0	0
Amyema	seemeniana	Downey 1998	AAP: Australia	[no data]	?	?	?	?	?	?	?	?	?	?	?	?	?	?	?	?	?	?	?	?	?	?	?	?	?	?	?	?	?	?	?	?	?	?	?	?	?	?	?	?	?	?	?	?	?
Amyema	subcapitata	Downey 1998	AAP: Australia	[no data]	?	?	?	?	?	?	?	?	?	?	?	?	?	?	?	?	?	?	?	?	?	?	?	?	?	?	?	?	?	?	?	?	?	?	?	?	?	?	?	?	?	?	?	?	?
Amyema	thalassia	Downey 1998	AAP: Australia	3	0	0	0	0	0	0	0	0	0	0	0	0	0	0	1	0	0	0	0	0	0	0	0	0	0	0	0	0	0	0	0	0	0	0	0	0	0	0	0	0	0	0	0	1	0
Amyema	tridactyla	Downey 1998	AAP: Australia	1	0	0	0	0	0	0	0	0	0	0	0	0	0	0	0	0	0	0	0	0	0	0	0	0	0	0	0	0	0	0	0	0	0	0	0	0	0	0	0	0	0	0	0	0	0
Amyema	villiflora	Downey 1998	AAP: Australia	17	0	0	0	0	0	1	0	0	0	0	0	0	0	0	0	0	0	0	0	0	0	0	0	0	1	0	0	0	0	1	0	0	0	0	0	0	0	0	0	0	0	1	0	1	0
Amyema	whitei	Downey 1998	AAP: Australia	6	0	0	0	0	0	0	0	0	0	0	0	0	0	0	0	0	0	0	0	1	0	0	0	0	0	0	0	0	0	0	0	0	0	0	0	0	0	0	0	0	0	0	0	1	0
Amylotheca	dictyophleba	Downey 1998	AAP: Australia	28	0	0	0	0	1	0	0	0	0	0	0	0	1	0	0	0	0	0	0	0	1	0	0	0	1	0	0	0	1	0	1	0	0	0	0	0	0	1	1	0	1	0	0	1	1
Amylotheca	subumbellata	Downey 1998	AAP: Australia	4	0	0	0	0	0	0	0	0	0	0	0	0	0	0	0	0	0	0	0	0	0	0	0	0	1	0	0	0	0	0	0	0	0	0	0	0	0	0	0	0	0	0	0	0	0
Benthamina	alyxifolia	Downey 1998	AAP: Australia	9	0	0	0	0	0	0	0	0	0	0	0	0	0	0	0	1	0	0	0	0	1	0	0	0	1	0	0	0	0	0	0	0	0	0	0	0	0	0	0	0	0	0	0	0	0
Cecarria	obtusifolia	Downey 1998	AAP: Australia	1	0	0	0	0	0	0	0	0	0	0	0	0	0	0	0	0	0	0	0	0	0	0	0	0	0	0	0	0	0	0	0	0	0	0	0	0	0	0	0	0	0	0	0	0	0
Dactyliophora	novaeguineae	Downey 1998	AAP: Australia	1	0	0	0	0	0	0	0	0	0	0	0	0	0	0	0	0	0	0	0	0	0	0	0	0	0	0	0	0	0	0	0	0	0	0	0	0	0	0	0	0	0	0	0	1	0
Decaisnina	angustata	Downey 1998	AAP: Australia	12	0	0	0	1	0	0	0	0	0	0	0	0	0	0	0	0	0	0	0	0	0	0	0	0	0	1	1	0	0	1	0	0	0	0	0	0	0	0	0	0	0	0	0	0	0
Decaisnina	biangulata	Downey 1998	AAP: Australia	2	0	0	0	0	0	0	0	0	0	0	0	0	0	0	0	0	0	0	0	0	0	0	0	0	0	0	0	0	0	1	0	0	0	0	0	0	0	0	0	0	0	0	0	0	0
Decaisnina	brittenii	Downey 1998	AAP: Australia	8	0	0	0	1	0	1	0	0	0	0	0	0	0	0	0	0	0	0	0	0	0	0	0	0	0	0	1	0	0	1	0	0	0	0	0	0	0	0	0	0	0	0	0	0	0
Decaisnina	congesta	Downey 1998	AAP: Australia	2	0	0	0	0	0	1	0	0	0	0	0	0	0	0	0	0	0	0	0	0	0	0	0	0	0	0	0	0	0	0	0	0	0	0	0	0	0	0	0	0	0	0	0	0	0
Decaisnina	hollrungii	Downey 1998	AAP: Australia	1	0	0	0	0	0	0	0	0	0	0	0	0	0	0	0	0	0	0	0	0	0	0	0	0	0	0	0	0	0	0	0	0	0	0	0	0	0	0	0	0	0	0	0	0	0
Decaisnina	signata	Downey 1998	AAP: Australia	12	0	0	0	1	0	1	0	0	0	0	0	0	0	0	0	0	0	0	0	0	0	0	0	0	0	0	1	0	0	1	0	0	0	0	0	0	0	0	0	0	0	0	0	1	0
Decaisnina	triflora	Downey 1998	AAP: Australia	21	0	0	0	1	0	1	0	0	0	0	0	0	0	0	0	0	0	0	0	0	0	0	0	0	1	0	1	0	1	1	0	0	0	0	0	1	0	1	1	0	0	0	0	1	0
Dendrophthoe	acacioides	Downey 1998	AAP: Australia	12	0	0	0	1	0	0	0	0	0	0	0	0	0	1	1	0	0	0	0	0	0	1	0	0	0	0	0	0	0	1	0	0	0	0	0	0	0	0	0	0	0	0	0	0	0
Dendrophthoe	curvata	Downey 1998	AAP: Australia	17	0	0	0	1	1	1	0	0	0	0	0	0	1	0	0	0	0	0	0	0	0	0	0	0	1	0	0	0	0	0	0	0	0	0	0	0	0	0	0	0	0	0	0	1	0
Dendrophthoe	glabrescens	Downey 1998	AAP: Australia	22	0	0	0	1	0	1	0	0	0	0	0	0	0	0	1	0	1	0	0	0	0	0	0	0	1	0	1	0	0	1	0	0	0	0	0	0	0	1	0	0	0	0	0	1	0
Dendrophthoe	homoplastica	Downey 1998	AAP: Australia	5	0	0	0	1	0	0	0	0	0	0	0	0	0	0	0	0	0	0	0	0	0	0	0	0	0	0	0	0	0	1	0	0	0	0	0	0	0	0	0	0	0	0	0	0	0
Dendrophthoe	odontocalyx	Downey 1998	AAP: Australia	6	0	0	0	1	0	0	0	0	0	0	0	0	0	0	0	0	0	0	0	0	0	0	0	0	0	0	0	0	0	1	0	0	0	0	0	0	0	0	0	0	0	0	0	0	0
Dendrophthoe	pentandra	Start 2011	EAS: 'Thailand	16	0	0	0	1	0	1	0	1	0	0	1	0	0	0	0	0	0	0	0	0	0	0	0	0	0	0	0	0	0	1	0	0	0	0	0	0	1	0	0	0	0	0	0	1	0
Dendrophthoe	pentandra [in China]	Qiu & Gilbert 2003	EAS: (Flora of China)	5	0	0	0	1	0	0	0	0	0	0	0	0	0	0	0	0	1	0	0	0	0	0	0	0	0	0	0	0	0	0	0	0	0	0	0	0	0	0	0	0	0	0	0	1	0
Dendrophthoe	vitellina	Downey 1998	AAP: Australia	27	0	0	0	1	1	1	0	0	0	0	0	0	0	0	0	0	1	0	0	0	0	0	0	0	1	0	0	0	1	0	0	0	0	0	0	0	0	0	0	0	0	0	0	1	0
Diplatia	furcata	Downey 1998	AAP: Australia	5	0	0	0	0	0	0	0	0	0	0	0	0	0	0	0	0	0	0	0	0	0	0	0	0	0	0	0	0	0	0	0	0	0	0	0	0	0	0	0	0	0	0	0	0	0
Diplatia	grandibractea	Downey 1998	AAP: Australia	3	0	0	0	0	0	0	0	0	0	0	0	0	0	0	0	0	0	0	0	0	0	0	0	0	0	0	0	0	0	0	0	0	0	0	0	0	0	0	0	0	0	0	0	0	0
Diplatia	tomentosa	Downey 1998	AAP: Australia	1	0	0	0	0	0	0	0	0	0	0	0	0	0	0	0	0	0	0	0	0	0	0	0	0	0	0	0	0	0	0	0	0	0	0	0	0	0	0	0	0	0	0	0	0	0
Elythranthe	albida	Qiu & Gilbert 2003	EAS: (Flora of China)	2	0	0	0	0	0	0	0	0	0	0	0	0	0	0	0	0	0	0	0	0	0	0	0	0	0	0	0	0	0	0	0	0	0	0	0	0	0	0	0	0	0	0	0	0	0
Elythranthe	parasitica	Qiu & Gilbert 2003	EAS: (Flora of China)	1	0	0	0	0	0	0	0	0	0	0	0	0	0	0	0	0	0	0	0	0	0	0	0	0	0	0	0	0	0	0	0	0	0	0	0	0	0	0	0	0	0	0	0	0	0
Erianthemum	dregei	Dzerefos et al. 2003	AFR: South African savanna	11	0	0	0	1	0	0	0	0	0	1	0	0	0	0	0	0	0	0	0	0	0	0	0	0	0	1	0	0	0	1	0	0	0	0	0	0	0	1	0	0	0	0	0	0	0
Helixanthera	coccinea	Qiu & Gilbert 2003	EAS: (Flora of China)	1	0	0	0	0	0	0	0	0	0	0	0	0	0	0	0	0	0	0	0	0	0	0	0	0	0	0	0	0	0	0	0	0	0	0	0	0	0	0	0	0	0	0	0	0	0
Helixanthera	guangxiensis	Qiu & Gilbert 2003	EAS: (Flora of China)	1	0	0	0	0	0	0	0	0	0	0	0	0	0	0	0	0	0	0	0	0	0	0	0	0	0	0	0	0	0	0	0	0	0	0	0	0	0	0	0	0	0	0	0	0	0
Helixanthera	parasitica	Qiu & Gilbert 2003	EAS: (Flora of China)	8	0	0	0	0	0	0	0	0	0	0	0	0	0	0	0	0	0	0	0	0	0	0	0	0	0	0	0	0	0	0	0	0	0	0	0	0	0	0	0	0	0	0	0	1	0
Helixanthera	pulchra	Qiu & Gilbert 2003	EAS: (Flora of China)	1	0	0	0	0	0	0	0	0	0	0	0	0	0	0	0	0	0	0	0	0	0	0	0	0	0	0	0	0	0	0	0	0	0	0	0	0	0	0	0	0	1	0	0	0	0
Helixanthera	sampsonii	Qiu & Gilbert 2003	EAS: (Flora of China)	4	0	0	0	0	0	0	0	0	0	0	0	0	0	0	0	0	0	0	0	0	0	0	0	0	0	0	0	0	0	0	0	0	0	0	0	0	0	1	0	0	0	0	0	1	0
Helixanthera	scoriarum	Qiu & Gilbert 2003	EAS: (Flora of China)	1	0	0	0	0	0	0	0	0	0	0	0	0	0	0	0	0	0	0	0	0	0	0	0	0	0	0	0	0	0	0	0	0	0	0	0	0	0	0	0	0	0	0	0	0	0
Helixanthera	terrestris	Qiu & Gilbert 2003	EAS: (Flora of China)	1	0	0	0	0	0	0	0	0	0	0	0	0	0	0	0	0	0	0	0	0	0	0	0	0	0	0	0	0	0	0	0	0	0	0	0	0	0	0	0	0	0	0	0	0	0
Ileostylus	micranthus	de Lange et al., 1995; Norton & de Lange 1999	AAP: New Zealand	47	1	1	0	0	0	0	0	1	1	1	1	0	0	0	0	0	0	0	0	0	0	0	1	0	0	1	0	0	0	0	0	0	1	0	0	0	0	0	1	1	1	0	0	0	0
Loranthus	delavayi	Qiu & Gilbert 2003	EAS: (Flora of China)	4	0	0	0	0	0	0	0	0	0	0	1	0	0	0	0	0	0	0	0	0	0	0	0	0	0	0	0	0	0	0	0	0	0	0	0	0	0	0	0	0	0	0	0	0	0
Loranthus	europaeus	Zebec & Idžojtić 2006	WEA: Croatia	2	0	0	0	0	0	0	0	0	0	0	1	0	0	0	0	0	0	0	0	0	0	0	0	0	0	0	0	0	0	0	0	0	0	0	0	0	0	0	0	0	0	0	0	0	0
Loranthus	europaeus	Kumbasli et al. 2011	WEA: Turkey	1	0	0	0	0	0	0	0	0	0	0	0	0	0	0	0	0	0	0	0	0	0	0	0	0	0	0	0	0	0	0	0	0	0	0	0	0	0	0	0	0	0	0	0	0	0
Loranthus	guizhouensis	Qiu & Gilbert 2003	EAS: (Flora of China)	2	0	0	0	0	0	0	0	0	0	0	0	0	0	0	0	0	0	0	0	0	0	0	0	0	0	0	0	0	0	0	0	0	0	0	0	0	0	0	0	0	0	0	0	0	0
Loranthus	kaoi	Qiu & Gilbert 2003	EAS: (Flora of China)	1	0	0	0	0	0	0	0	0	0	0	0	0	0	0	0	0	0	0	0	0	0	0	0	0	0	0	0	0	0	0	0	0	0	0	0	0	0	0	0	0	0	0	0	0	0
Loranthus	lambertianus	Qiu & Gilbert 2003	EAS: (Flora of China)	1	0	0	0	0	0	0	0	0	0	0	0	0	0	0	0	0	0	0	0	0	0	0	0	0	0	0	0	0	0	0	0	0	0	0	0	0	0	0	0	0	0	0	0	0	0
Loranthus	pseudo-odoratus	Qiu & Gilbert 2003	EAS: (Flora of China)	1	0	0	0	0	0	0	0	0	0	0	0	0	0	0	0	0	0	0	0	0	0	0	0	0	0	0	0	0	0	0	0	0	0	0	0	0	0	0	0	0	0	0	0	0	0
Loranthus	tanakae	Qiu & Gilbert 2003	EAS: (Flora of China)	4	0	0	0	0	0	0	0	0	0	0	1	0	0	0	0	0	0	0	0	0	0	0	0	0	0	0	0	0	0	0	0	0	0	0	0	0	0	0	0	0	0	0	0	0	0
Lysiana	casuarinae	Downey 1998	AAP: Australia	9	0	0	0	0	0	1	0	0	0	0	0	0	0	0	0	0	0	0	0	0	0	0	0	0	1	0	0	0	0	0	0	0	0	0	0	0	0	0	0	0	0	0	0	0	0
Lysiana	exocarpi	Downey 1998	AAP: Australia	22	0	0	1	0	0	1	0	0	0	0	0	0	0	0	0	0	0	0	0	0	0	1	0	0	1	0	0	0	0	0	0	0	0	0	0	0	0	0	0	0	0	0	0	0	0
Lysiana	filifolia	Downey 1998	AAP: Australia	2	0	0	0	0	0	0	0	0	0	0	0	0	0	0	0	0	0	0	0	0	0	0	0	0	1	0	0	0	0	0	0	0	0	0	0	0	0	0	0	0	0	0	0	0	0
Lysiana	linearifolia	Downey 1998	AAP: Australia	10	0	0	0	0	0	1	0	0	0	0	0	0	0	0	0	0	0	0	0	0	0	1	0	0	0	0	0	0	0	0	0	0	0	0	0	0	0	0	0	0	0	0	0	0	0
Lysiana	maritima	Downey 1998	AAP: Australia	7	0	0	0	0	0	0	0	0	0	0	0	0	0	0	0	0	0	0	0	0	0	1	0	0	1	0	0	0	0	0	0	0	0	0	0	0	0	0	0	0	0	0	0	1	0
Lysiana	murrayi	Downey 1998	AAP: Australia	7	0	0	0	0	0	0	0	0	0	0	0	0	0	0	0	0	0	0	0	0	0	0	0	0	1	0	0	0	0	0	0	0	0	0	0	0	0	0	0	0	0	0	0	0	0
Lysiana	spathulata	Downey 1998	AAP: Australia	23	0	0	0	1	0	1	0	0	0	0	0	0	0	0	1	0	0	0	0	0	0	1	0	0	0	0	0	0	0	1	0	0	0	0	0	0	0	0	0	0	0	0	0	1	0
Lysiana	subfalcata	Downey 1998	AAP: Australia	23	0	0	0	0	0	1	0	0	0	0	0	0	0	0	0	0	0	0	0	0	0	1	0	0	1	1	0	0	0	0	0	0	0	0	0	0	0	0	0	0	0	0	0	1	0
Macrosolen	bibracteolatus	Qiu & Gilbert 2003	EAS: (Flora of China)	4	0	0	0	0	0	0	0	0	0	0	0	0	0	0	0	0	0	0	0	0	0	0	0	0	0	0	0	0	0	0	0	0	0	0	0	0	0	0	0	0	0	0	0	0	0
Macrosolen	cochinchinensis	Qiu & Gilbert 2003	EAS: (Flora of China)	7	0	1	0	0	0	0	0	0	0	0	0	0	0	0	0	0	0	0	0	0	0	0	0	0	0	0	0	0	0	0	0	0	0	0	0	0	0	0	0	0	0	0	0	1	0
Macrosolen	geminatus	Qiu & Gilbert 2003	EAS: (Flora of China)	1	0	0	0	0	0	0	0	0	0	0	0	0	0	0	0	0	0	0	0	0	0	0	0	0	0	0	0	0	0	0	0	0	0	0	0	0	0	0	0	0	0	0	0	0	0
Macrosolen	robinsonii	Qiu & Gilbert 2003	EAS: (Flora of China)	1	0	0	0	0	0	0	0	0	0	0	0	0	0	0	0	0	0	0	0	0	0	0	0	0	0	0	0	0	0	0	0	0	0	0	0	0	0	0	0	0	0	0	0	0	0
Macrosolen	tricolor	Qiu & Gilbert 2003	EAS: (Flora of China)	5	0	0	0	0	0	0	0	0	0	0	0	0	0	0	0	0	0	0	0	0	0	0	0	0	0	0	0	0	0	1	0	0	0	0	0	0	0	0	0	0	0	0	0	0	0
Muellerina	bidwillii	Downey 1998	AAP: Australia	2	0	0	0	0	0	0	0	0	0	0	0	0	0	0	0	0	0	0	0	0	0	0	0	0	0	0	0	0	0	0	0	0	0	0	0	0	0	0	0	0	0	0	0	0	0
Muellerina	celastroides	Downey 1998	AAP: Australia	20	0	0	0	1	0	1	0	1	0	0	0	0	0	0	0	0	0	0	0	0	0	0	0	0	1	0	0	0	0	0	0	0	0	0	0	0	0	0	0	0	1	0	0	0	0
Muellerina	celastroides	de Lange et al., 1995	AAP: New Zealand	1	0	0	0	0	0	0	0	0	0	0	0	0	0	0	0	0	0	0	0	0	0	0	0	0	0	0	0	0	0	0	0	0	0	0	0	0	0	0	0	0	0	0	0	0	0
Muellerina	eucalyptoides	Downey 1998	AAP: Australia	16	0	0	0	1	0	1	0	0	0	0	0	0	0	0	0	0	0	0	0	0	0	0	0	0	1	1	0	0	0	0	0	0	0	0	0	0	0	0	0	0	0	0	0	0	0
Muellerina	myrtifolia	Downey 1998	AAP: Australia	5	0	0	0	0	0	0	0	0	0	0	0	0	1	0	0	0	0	0	0	0	0	0	0	0	1	0	0	0	0	0	0	0	0	0	0	0	0	0	0	0	0	0	0	1	0
Pedistylis	galpinii	Dzerefos et al. 2003	AFR: South African savanna	6	0	0	0	1	0	0	0	0	0	1	0	0	0	0	0	0	0	0	0	0	0	0	0	0	0	0	0	0	0	1	0	0	0	0	0	0	0	1	0	0	0	0	0	0	0
Peraxilla	colensoi	de Lange et al., 1995; Norton & de Lange 1999	AAP: New Zealand	8	0	0	0	0	0	0	0	0	0	0	1	0	0	0	0	0	0	0	0	0	0	0	0	0	0	0	0	0	0	0	0	0	0	0	0	0	0	0	0	0	0	0	0	0	0
Peraxilla	tetrapetala	de Lange et al., 1995; Norton & de Lange 1999	AAP: New Zealand	11	0	0	0	0	0	0	0	0	0	0	1	0	0	0	0	0	0	0	0	0	0	0	0	0	0	0	0	0	0	0	0	0	0	1	0	0	0	0	0	1	1	0	0	0	0
Plicosepalus	acaciae	Todt et al. 2000	WEA: Israel	9	0	0	1	1	0	0	0	0	0	0	0	0	0	0	0	0	0	0	0	0	0	0	0	0	1	0	0	0	0	0	0	0	0	0	0	0	0	0	0	0	0	0	0	0	0
Plicosepalus	amplexicaulis	Wiens 1978	AFR: South Africa	1	0	0	0	0	0	0	0	0	0	0	0	0	0	0	0	0	0	0	0	0	0	0	0	0	0	0	0	0	0	0	0	0	0	0	0	0	0	0	0	0	0	0	0	0	0
Psittacanthus	biternatus	Ferreira Fadini 2011	SAM: Brazilian savanna	2	0	0	0	0	0	0	0	0	0	0	0	0	0	0	0	0	0	0	0	0	0	0	0	0	0	0	0	0	0	0	0	0	0	0	0	0	0	0	0	0	0	0	0	0	0
Psittacanthus	eucalyptifolius	Ferreira Fadini 2011	SAM: Brazilian savanna	1	0	0	0	0	0	0	0	0	0	0	0	0	0	0	0	0	0	0	0	0	0	0	0	0	0	0	0	0	0	0	0	0	0	0	0	0	0	0	0	0	0	0	0	0	0
Psittacanthus	plagiophyllus	Ferreira Fadini 2011	SAM: Brazilian savanna	1	0	0	0	1	0	0	0	0	0	0	0	0	0	0	0	0	0	0	0	0	0	0	0	0	0	0	0	0	0	0	0	0	0	0	0	0	0	0	0	0	0	0	0	0	0
Psittacanthus	robustus	Ferreira Monteiro et al. 1992	SAM: SE. Brazil	2	0	0	0	0	0	0	0	0	0	0	0	0	0	0	0	0	0	0	0	0	0	0	0	0	0	0	0	0	0	0	0	0	0	0	0	0	0	0	0	0	0	0	0	0	0
Psittacanthus	schiedeanus	López de Buen & Ornelas 1999	NAM: Central Veracruz, Mexico	12	0	1	0	0	0	0	0	0	0	0	0	0	0	0	0	0	1	0	0	0	0	0	0	0	0	0	0	1	0	0	0	0	0	0	0	0	0	0	0	0	0	0	0	0	0
Scurrula	atropurpurea	Qiu & Gilbert 2003	EAS: (Flora of China)	[no data]	?	?	?	?	?	?	?	?	?	?	?	?	?	?	?	?	?	?	?	?	?	?	?	?	?	?	?	?	?	?	?	?	?	?	?	?	?	?	?	?	?	?	?	?	?
Scurrula	buddleioides	Qiu & Gilbert 2003	EAS: (Flora of China)	7	0	0	0	0	0	0	0	0	0	0	0	0	0	0	0	0	0	0	0	0	0	0	1	0	0	0	0	0	0	0	0	1	0	0	0	0	0	0	0	0	0	0	0	0	0
Scurrula	chingii	Qiu & Gilbert 2003	EAS: (Flora of China)	11	0	0	0	0	0	1	0	0	0	0	0	0	0	0	0	0	0	0	0	0	0	0	0	0	0	0	0	0	0	0	0	0	0	0	0	0	0	1	0	0	0	0	0	1	0
Scurrula	elata	Qiu & Gilbert 2003	EAS: (Flora of China)	5	1	0	0	0	0	0	1	0	0	0	0	0	0	0	0	0	0	0	0	0	0	0	0	0	0	0	0	0	0	0	0	0	0	0	0	0	0	0	0	0	1	0	0	0	0
Scurrula	ferruginea	Qiu & Gilbert 2003	EAS: (Flora of China)	4	0	0	0	0	0	0	0	0	0	0	0	0	0	0	0	0	0	0	0	0	0	0	0	0	0	0	0	0	0	0	0	0	0	0	0	0	0	0	0	0	0	0	0	0	0
Scurrula	gongshanensis	Qiu & Gilbert 2003	EAS: (Flora of China)	1	0	0	0	0	0	0	0	0	0	0	0	0	0	0	0	0	0	0	0	0	0	0	0	0	0	0	0	0	0	0	0	0	0	0	0	0	0	0	0	0	0	0	0	0	0
Scurrula	notothixoides	Qiu & Gilbert 2003	EAS: (Flora of China)	7	0	0	0	0	0	1	0	0	0	0	0	0	0	0	0	1	0	0	0	0	0	0	0	0	0	0	0	0	0	0	0	0	0	0	0	0	0	0	0	0	0	0	0	0	0
Scurrula	parasitica	Qiu & Gilbert 2003	EAS: (Flora of China)	14	0	0	0	0	0	1	0	0	0	0	0	0	0	0	0	0	0	0	0	0	0	0	0	0	0	0	0	0	0	0	0	0	0	0	0	0	0	0	0	0	0	0	0	1	0
Scurrula	phoebe-formosanae	Qiu & Gilbert 2003	EAS: (Flora of China)	2	0	0	0	0	0	0	0	0	0	0	0	0	0	0	0	0	0	0	0	0	0	0	0	0	0	0	0	0	0	0	0	0	0	0	0	0	0	0	0	0	0	0	0	0	0
Scurrula	pulverulenta	Qiu & Gilbert 2003	EAS: (Flora of China)	4	0	0	0	0	0	0	0	0	0	0	0	0	0	0	0	0	0	0	0	0	0	0	0	0	0	0	0	0	0	0	0	0	0	0	0	0	0	0	0	0	0	0	0	1	0
Struthanthus	aff. polyanthus	Arruda et al. 2006	SAM: Brazilian cerrado (savanna woodland)	6	0	0	0	0	0	0	0	0	0	0	0	0	0	0	0	0	0	0	1	0	0	0	0	1	0	0	0	0	0	0	0	0	0	0	0	0	0	0	0	0	0	0	0	0	0
Tapinanthus	crassifolius	Wiens 1978	AFR: South Africa	1	0	0	0	1	0	0	0	0	0	0	0	0	0	0	0	0	0	0	0	0	0	0	0	0	0	0	0	0	0	0	0	0	0	0	0	0	0	0	0	0	0	0	0	0	0
Taxillus	balansae	Qiu & Gilbert 2003	EAS: (Flora of China)	6	0	1	0	0	0	0	0	0	0	0	0	0	0	0	0	0	0	0	0	0	0	0	0	0	0	0	0	0	0	0	0	0	0	0	0	0	0	0	0	0	0	0	0	1	0
Taxillus	caloreas	Qiu & Gilbert 2003	EAS: (Flora of China)	1	0	0	0	0	0	0	0	0	0	0	0	0	0	0	0	0	0	0	0	0	0	0	0	0	0	0	0	0	0	0	0	0	0	0	0	0	0	0	0	0	0	0	0	0	0
Taxillus	chinensis	Qiu & Gilbert 2003	EAS: (Flora of China)	8	0	0	0	0	0	0	0	0	0	0	0	0	0	0	0	0	0	0	0	0	0	0	0	0	0	0	0	0	0	0	0	0	0	0	0	0	0	0	0	0	0	0	0	1	0
Taxillus	delavayi	Qiu & Gilbert 2003	EAS: (Flora of China)	5	0	0	0	0	0	0	0	0	0	0	1	0	0	0	0	0	0	0	0	0	0	0	0	0	0	0	0	0	0	0	0	1	0	0	0	0	0	0	0	0	0	0	0	0	0
Taxillus	kaempferi	Qiu & Gilbert 2003	EAS: (Flora of China)	1	0	0	0	0	0	0	0	0	0	0	0	0	0	0	0	0	0	0	0	0	0	0	0	0	0	0	0	0	0	0	0	0	0	0	0	0	0	0	0	0	0	0	0	0	0
Taxillus	levinei	Qiu & Gilbert 2003	EAS: (Flora of China)	4	0	0	0	0	0	0	0	0	0	0	0	0	0	0	0	0	0	0	0	0	0	0	0	0	0	0	0	0	0	0	0	0	0	0	0	0	0	0	0	0	0	0	0	0	0
Taxillus	limprichtii	Qiu & Gilbert 2003	EAS: (Flora of China)	9	0	1	0	0	0	0	0	0	0	0	0	0	0	0	0	0	0	0	0	0	0	0	0	0	0	0	0	0	0	0	0	0	0	0	0	0	0	0	0	0	0	0	0	1	0
Taxillus	liquidambaricola	Qiu & Gilbert 2003	EAS: (Flora of China)	10	0	1	0	0	1	1	0	0	0	0	0	0	0	0	0	0	0	0	0	0	0	0	0	0	0	0	0	0	0	0	0	0	0	0	1	0	0	1	0	0	0	0	0	1	0
Taxillus	nigrans	Qiu & Gilbert 2003	EAS: (Flora of China)	5	0	0	0	0	0	0	0	0	0	0	0	0	0	0	0	0	0	0	0	0	0	0	0	0	0	0	0	0	0	0	0	0	0	0	0	0	0	0	0	0	0	0	0	0	0
Taxillus	pseudochinensis	Qiu & Gilbert 2003	EAS: (Flora of China)	3	0	0	0	0	0	0	0	0	0	0	0	0	0	0	0	0	0	0	0	0	0	0	0	0	0	0	0	0	0	0	0	0	0	0	1	0	0	0	0	0	1	0	0	0	0
Taxillus	renii	Qiu & Gilbert 2003	EAS: (Flora of China)	1	0	0	0	0	0	0	0	0	0	0	0	0	0	0	0	0	0	0	0	0	0	0	0	0	0	0	0	0	0	0	0	0	0	0	0	0	0	0	0	0	0	0	0	0	0
Taxillus	sericus	Qiu & Gilbert 2003	EAS: (Flora of China)	2	0	0	0	0	0	0	0	0	0	0	1	0	0	0	0	0	0	0	0	0	0	0	0	0	0	0	0	0	0	0	0	0	0	0	0	0	0	0	0	0	0	0	0	0	0
Taxillus	sutchuenensis	Qiu & Gilbert 2003	EAS: (Flora of China)	13	0	0	0	1	0	0	0	0	0	0	0	0	0	0	0	0	0	0	0	0	0	0	0	0	0	0	0	0	0	0	0	0	0	0	0	0	0	0	0	0	0	0	0	1	0
Taxillus	theifer	Qiu & Gilbert 2003	EAS: (Flora of China)	3	0	0	0	1	0	0	0	0	0	0	0	0	0	0	0	0	0	0	0	0	0	0	0	0	0	0	0	0	0	0	0	0	0	0	0	0	0	0	0	0	0	0	0	0	0
Taxillus	thibetensis	Qiu & Gilbert 2003	EAS: (Flora of China)	4	0	0	0	0	0	0	0	0	0	0	0	0	0	0	0	0	0	0	0	0	0	0	0	0	0	0	0	0	0	0	0	0	0	0	0	0	0	1	0	0	0	0	0	0	0
Taxillus	tsaii	Qiu & Gilbert 2003	EAS: (Flora of China)	4	0	0	0	0	0	0	0	0	0	0	0	0	0	0	0	0	0	0	0	0	0	0	0	0	0	0	0	0	0	0	0	0	0	0	0	0	0	0	0	0	0	0	0	0	0
Taxillus	umbellifer	Qiu & Gilbert 2003	EAS: (Flora of China)	1	0	0	0	0	0	0	0	0	0	0	0	0	0	0	0	0	0	0	0	0	0	0	0	0	0	0	0	0	0	0	0	0	0	0	0	0	0	0	0	0	0	0	0	0	0
Taxillus	vestitus	Qiu & Gilbert 2003	EAS: (Flora of China)	1	0	0	0	0	0	0	0	0	0	0	0	0	0	0	0	0	0	0	0	0	0	0	0	0	0	0	0	0	0	0	0	0	0	0	0	0	0	0	0	0	0	0	0	0	0
Tolypanthus	esquirolii	Qiu & Gilbert 2003	EAS: (Flora of China)	3	0	0	0	0	0	0	0	0	0	0	0	0	0	0	0	0	0	0	0	0	0	0	0	0	0	0	0	0	0	0	0	0	0	0	0	0	0	0	0	0	0	0	0	1	0
Tolypanthus	maclurei	Qiu & Gilbert 2003	EAS: (Flora of China)	8	0	0	0	0	0	0	1	0	0	0	0	0	0	0	0	0	0	0	0	0	0	0	0	0	0	0	0	0	0	0	0	0	0	0	0	0	0	1	0	1	1	0	0	0	0
Trilepidea	adamsii	de Lange et al., 1995	AAP: New Zealand	3	0	0	0	0	0	0	0	0	0	0	0	0	0	0	0	0	0	0	0	0	0	0	0	0	0	0	0	0	0	0	0	0	0	0	0	0	0	0	0	0	0	0	0	0	0
Tripodanthus	acutifolius	Amico et al. 2012	SAM: (continent)	5	0	0	0	1	0	0	0	0	0	0	0	0	0	0	0	0	0	0	0	0	0	0	0	0	0	0	0	0	0	0	0	0	0	0	0	0	0	0	0	0	0	0	0	0	0
Tripodanthus	belmirensis	Amico et al. 2012	SAM: (continent)	[no data]	?	?	?	?	?	?	?	?	?	?	?	?	?	?	?	?	?	?	?	?	?	?	?	?	?	?	?	?	?	?	?	?	?	?	?	?	?	?	?	?	?	?	?	?	?
Tripodanthus	flagellaris	Amico et al. 2012	SAM: (continent)	1	0	0	0	0	0	0	0	0	0	0	0	0	0	0	0	0	0	0	0	0	0	0	0	0	0	0	0	0	0	0	0	0	0	0	0	0	0	0	0	0	0	0	0	0	0
Tristerix	aphyllus	Kuiijt 1988	SAM: NC. Columbia into Andes of S. China	1	0	0	0	0	0	0	0	0	0	0	0	0	0	0	0	0	0	1	0	0	0	0	0	0	0	0	0	0	0	0	0	0	0	0	0	0	0	0	0	0	0	0	0	0	0
Tristerix	chodatianus	Kuiijt 1988	SAM: NC. Columbia into Andes of S. China	1	0	0	0	0	0	0	0	0	0	0	0	0	0	0	0	0	0	0	0	0	0	0	0	0	0	0	0	0	0	0	0	0	0	0	0	0	0	0	0	0	0	0	0	0	0
Tristerix	corymbosus	Kuiijt 1988	SAM: NC. Columbia into Andes of S. China	20	0	0	0	1	0	0	0	0	0	1	0	1	0	0	0	0	0	0	0	0	0	0	0	0	0	1	0	0	0	0	0	0	0	1	0	0	0	0	0	1	1	0	0	1	0
Tristerix	grandiflorus	Kuiijt 1988	SAM: NC. Columbia into Andes of S. China	2	0	0	0	0	0	0	0	0	0	0	0	0	0	0	0	0	0	0	0	0	0	0	0	0	0	0	0	0	1	0	0	0	0	0	0	0	0	0	0	0	0	0	0	0	0
Tristerix	longebracteatus	Kuiijt 1988	SAM: NC. Columbia into Andes of S. China	6	0	0	0	0	0	0	0	0	0	1	1	0	0	0	0	0	0	0	0	0	0	0	0	0	0	0	0	0	0	0	0	0	0	0	0	0	0	0	0	0	0	0	0	0	0
Tristerix	penduliflorus	Kuiijt 1988	SAM: NC. Columbia into Andes of S. China	5	0	0	0	1	0	0	0	0	0	0	0	1	0	0	0	0	0	0	0	0	0	0	0	0	0	0	0	0	0	0	0	0	0	0	0	0	0	0	0	0	1	0	0	0	0
Tristerix	peruvianus	Kuiijt 1988	SAM: NC. Columbia into Andes of S. China	2	0	0	0	0	0	0	0	0	0	1	0	0	0	0	0	0	0	0	0	0	0	0	0	0	0	0	0	0	0	0	0	0	0	0	0	0	0	0	0	0	0	0	0	0	0
Tristerix	peytonii	Kuiijt 1988	SAM: NC. Columbia into Andes of S. China	[no data]	?	?	?	?	?	?	?	?	?	?	?	?	?	?	?	?	?	?	?	?	?	?	?	?	?	?	?	?	?	?	?	?	?	?	?	?	?	?	?	?	?	?	?	?	?
Tristerix	pubescens	Kuiijt 1988	SAM: NC. Columbia into Andes of S. China	3	0	0	0	0	0	0	0	0	0	1	0	1	0	0	0	0	0	0	0	0	0	0	0	0	0	0	0	0	0	0	0	0	0	0	0	0	0	0	0	0	0	0	0	0	0
Tristerix	secundus	Kuiijt 1988	SAM: NC. Columbia into Andes of S. China	[no data]	?	?	?	?	?	?	?	?	?	?	?	?	?	?	?	?	?	?	?	?	?	?	?	?	?	?	?	?	?	?	?	?	?	?	?	?	?	?	?	?	?	?	?	?	?
Tristerix	verticillatus	Kuiijt 1988	SAM: NC. Columbia into Andes of S. China	11	0	0	0	1	0	0	0	0	0	0	1	0	0	0	0	0	0	0	0	0	0	0	0	0	0	0	0	0	0	0	0	0	0	0	0	0	0	0	0	0	0	0	1	1	0
Tupeia	antarctica	de Lange et al., 1995; Norton & de Lange 1999	AAP: New Zealand	20	0	0	0	0	0	0	0	1	0	1	0	0	0	0	0	0	0	0	0	0	0	0	0	0	0	0	0	0	0	0	0	0	0	0	0	0	0	0	0	1	0	0	0	1	0
Vanwykia	remota	Wiens 1978	AFR: South Africa	[no data]	?	?	?	?	?	?	?	?	?	?	?	?	?	?	?	?	?	?	?	?	?	?	?	?	?	?	?	?	?	?	?	?	?	?	?	?	?	?	?	?	?	?	?	?	?
[truncated: 71 more columns]

## Sheet: DPCache_List
Organism	Accession number	Specimen-voucher	Definition	Authors (first line)	Journal (first line)	Tribe	Subtribe	Genus	Molecule type	Source	Sequence length	Region
Actinanthella menyharthii	EU544313	Nickrent 4375	Actinanthella menyharthii voucher Nickrent 4375 small subunit ribosomal RNA gene, partial sequence.	Vidal-Russell,R. and Nickrent,D.L.	Am. J. Bot. 95 (8), 1015-1029 (2008)	Lorantheae	Tapinanthinae	Actinanthella	genomic DNA	Nucleolus	1645	18S
Actinanthella menyharthii	EU544352	Nickrent 4375	Actinanthella menyharthii voucher Nickrent 4375 26S ribosomal RNA gene, partial sequence.	Vidal-Russell,R. and Nickrent,D.L.	Am. J. Bot. 95 (8), 1015-1029 (2008)	Lorantheae	Tapinanthinae	Actinanthella	genomic DNA	Nucleolus	1843	25S
Actinanthella menyharthii	EU544408	Nickrent 4375	Actinanthella menyharthii voucher Nickrent 4375 maturase K-like (matK) gene, partial sequence; chloroplast.	Vidal-Russell,R. and Nickrent,D.L.	Am. J. Bot. 95 (8), 1015-1029 (2008)	Lorantheae	Tapinanthinae	Actinanthella	genomic DNA	Chloroplast	1453	matK
Aetanthus nodosus	EU544314	Nickrent 4561	Aetanthus nodosus voucher Nickrent 4561 small subunit ribosomal RNA gene, partial sequence.	Vidal-Russell,R. and Nickrent,D.L.	Am. J. Bot. 95 (8), 1015-1029 (2008)	Psittacantheae	Psittacanthinae	Aetanthus	genomic DNA	Nucleolus	1138	18S
Aetanthus nodosus	EU544409	Nickrent 4561	Aetanthus nodosus voucher Nickrent 4561 maturase K-like (matK) gene, partial sequence; chloroplast.	Vidal-Russell,R. and Nickrent,D.L.	Am. J. Bot. 95 (8), 1015-1029 (2008)	Psittacantheae	Psittacanthinae	Aetanthus	genomic DNA	Chloroplast	1443	matK
Agelanthus sansibarensis	U59946	UNKNOWN	Agelanthus sansibaricus 18S ribosomal RNA gene, partial sequence.	Nickrent,D.L. and Duff,R.J.	(in) Moreno,M.T., Cubero,J.I., Berner,D., Joel,D., Musselman,L.J.	Lorantheae	Tapinanthinae	Agelanthus	genomic DNA	Nucleolus	1762	18S
Agelanthus sansibarensis	DQ333824	A. Robertson 7365	Agelanthus sansibarensis internal transcribed spacer 1, partial sequence; 5.8S ribosomal RNA gene, complete sequence; and internal transcribed spacer 2, partial sequence.	Wilson,C.A. and Calvin,C.L.	Am. J. Bot. 93 (5), 787-796 (2006)	Lorantheae	Tapinanthinae	Agelanthus	genomic DNA	Nucleolus	566	ITS1; 5.8S; ITS2
Agelanthus sansibarensis	DQ340573	A. Robertson 7365	Agelanthus sansibarensis tRNA-Leu (trnL) gene and trnL-trnF intergenic spacer, partial sequence; chloroplast.	Wilson,C.A. and Calvin,C.L.	Am. J. Bot. 93 (5), 787-796 (2006)	Lorantheae	Tapinanthinae	Agelanthus	genomic DNA	Chloroplast	339	trnL/LF
Agelanthus sansibarensis	EU544353	Nickrent 2987	Agelanthus sansibarensis voucher Nickrent 2987 26S ribosomal RNA gene, partial sequence.	Vidal-Russell,R. and Nickrent,D.L.	Am. J. Bot. 95 (8), 1015-1029 (2008)	Lorantheae	Tapinanthinae	Agelanthus	genomic DNA	Nucleolus	2107	25S
Agelanthus sansibarensis	EU544410	Nickrent 2987	Agelanthus sansibarensis voucher Nickrent 2987 maturase K (matK) gene, partial cds; chloroplast.	Vidal-Russell,R. and Nickrent,D.L.	Am. J. Bot. 95 (8), 1015-1029 (2008)	Lorantheae	Tapinanthinae	Agelanthus	genomic DNA	Chloroplast	1382	matK
Agelanthus sansibarensis	EU544464	Nickrent 2987	Agelanthus sansibarensis voucher Nickrent 2987 ribulose-1,5-bisphosphate carboxylase/oxygenase large subunit (rbcL) gene, partial cds; chloroplast.	Vidal-Russell,R. and Nickrent,D.L.	Unpublished	Lorantheae	Tapinanthinae	Agelanthus	genomic DNA	Chloroplast	1378	rbcL
Alepis flavida	L24139	UNKNOWN	Alepis flavida (Hook. f.) Tiegh. 18S ribosomal RNA gene, partial sequence.	Nickrent,D.L. and Duff,R.J.	(in) Moreno,M.T., Cubero,J.I., Berner,D., Joel,D., Musselman,L.J.	Elytrantheae	[n/a]	Alepis	genomic DNA	Nucleolus	1756	18S
Alepis flavida	DQ333847	Calvin and Wilson NZ98-04	Alepis flavida internal transcribed spacer 1, partial sequence; 5.8S ribosomal RNA gene, complete sequence; and internal transcribed spacer 2, partial sequence.	Wilson,C.A. and Calvin,C.L.	Am. J. Bot. 93 (5), 787-796 (2006)	Elytrantheae	[n/a]	Alepis	genomic DNA	Nucleolus	706	ITS1; 5.8S; ITS2
Alepis flavida	DQ340598	Calvin and Wilson NZ98-04	Alepis flavida tRNA-Leu (trnL) gene and trnL-trnF intergenic spacer, partial sequence; chloroplast.	Wilson,C.A. and Calvin,C.L.	Am. J. Bot. 93 (5), 787-796 (2006)	Elytrantheae	[n/a]	Alepis	genomic DNA	Chloroplast	648	trnL/LF
Alepis flavida	EF464474	Nickrent 2743	Alepis flavida 26S ribosomal RNA gene, partial sequence.	Vidal-Russell,R. and Nickrent,D.L.	Mol. Phylogenet. Evol. 47 (2), 523-537 (2008)	Elytrantheae	[n/a]	Alepis	genomic DNA	Nucleolus	887	25S
Alepis flavida	EF464481	Nickrent 2743	Alepis flavida tRNA-Leu (trnL) gene, partial sequence; trnL-trnF intergenic spacer, complete sequence; and tRNA-Phe (trnF) gene, partial sequence; chloroplast.	Vidal-Russell,R. and Nickrent,D.L.	Mol. Phylogenet. Evol. 47 (2), 523-537 (2008)	Elytrantheae	[n/a]	Alepis	genomic DNA	Chloroplast	650	trnL/LF
Alepis flavida	EF464508	Nickrent 2743	Alepis flavida maturase K (matK) gene, partial cds; chloroplast.	Vidal-Russell,R. and Nickrent,D.L.	Mol. Phylogenet. Evol. 47 (2), 523-537 (2008)	Elytrantheae	[n/a]	Alepis	genomic DNA	Chloroplast	1177	matK
Amyema beccarii	AY453106	SP15590	Amyema beccarii maturase (matR) gene, partial cds; mitochondrial.	Barkman,T.J., Lim,S.H., Salleh,K.M. and Nais,J.	Proc. Natl. Acad. Sci. U.S.A. 101 (3), 787-792 (2004)	Lorantheae	Amyeminae	Amyema	genomic DNA	Mitochondrion	1494	matR
Amyema beccarii	DQ110224	Rachman IS409, A	Amyema beccarii NADH dehydrogenase subunit 1 (NADH1) gene, partial sequence; mitochondrial.	Davis,C.C., Anderson,W.R. and Wurdack,K.J.	Proc. Biol. Sci. 272 (1578), 2237-2242 (2005)	Lorantheae	Amyeminae	Amyema	genomic DNA	Mitochondrion	1722	nad1
Amyema cambagei	DQ333833	Calvin and Wilson AU99-01	Amyema cambagei internal transcribed spacer 1, partial sequence; 5.8S ribosomal RNA gene, complete sequence; and internal transcribed spacer 2, partial sequence.	Wilson,C.A. and Calvin,C.L.	Am. J. Bot. 93 (5), 787-796 (2006)	Lorantheae	Amyeminae	Amyema	genomic DNA	Nucleolus	647	ITS1; 5.8S; ITS2
Amyema cambagei	DQ340582	Calvin and Wilson AU99-01	Amyema cambagei tRNA-Leu (trnL) gene and trnL-trnF intergenic spacer, partial sequence; chloroplast.	Wilson,C.A. and Calvin,C.L.	Am. J. Bot. 93 (5), 787-796 (2006)	Lorantheae	Amyeminae	Amyema	genomic DNA	Chloroplast	608	trnL/LF
Amyema congener	HM116953	UNKNOWN	Amyema congener internal transcribed spacer 1, 5.8S ribosomal RNA gene, and internal transcribed spacer 2, complete sequence.	Goldie,X., Gillman,L., Crisp,M. and Wright,S.	Proc. Biol. Sci. 277 (1694), 2645-2653 (2010)	Lorantheae	Amyeminae	Amyema	genomic DNA	Nucleolus	815	ITS1; 5.8S; ITS2
Amyema glabrum	AF039073	UNKNOWN	Amyema glabrum 18S ribosomal RNA gene, partial sequence.	Nickrent,D.L. and Duff,R.J.	(in) Moreno,M.T., Cubero,J.I., Berner,D., Joel,D., Musselman,L.J.	Lorantheae	Amyeminae	Amyema	genomic DNA	Nucleolus	1751	18S
Amyema glabrum	EU544354	Nickrent 2794	Amyema glabrum voucher Nickrent 2794 26S ribosomal RNA gene, partial sequence.	Vidal-Russell,R. and Nickrent,D.L.	Am. J. Bot. 95 (8), 1015-1029 (2008)	Lorantheae	Amyeminae	Amyema	genomic DNA	Nucleolus	2088	25S
Amyema glabrum	EU544411	Nickrent 2794	Amyema glabrum voucher Nickrent 2794 maturase K (matK) gene, partial cds; chloroplast.	Vidal-Russell,R. and Nickrent,D.L.	Am. J. Bot. 95 (8), 1015-1029 (2008)	Lorantheae	Amyeminae	Amyema	genomic DNA	Chloroplast	1336	matK
Amyema glabrum	EU544465	Nickrent 2794	Amyema glabrum voucher Nickrent 2794 ribulose-1,5-bisphosphate carboxylase/oxygenase large subunit (rbcL) gene, partial cds; chloroplast.	Vidal-Russell,R. and Nickrent,D.L.	Unpublished	Lorantheae	Amyeminae	Amyema	genomic DNA	Chloroplast	1133	rbcL
Amyema glabrum	EU544476	Nickrent 2794	Amyema glabrum voucher Nickrent 2794 tRNA-Leu (trnL) gene, partial sequence; trnL-trnF intergenic spacer, complete sequence; and tRNA-Phe (trnF) gene, partial sequence; chloroplast.	Vidal-Russell,R. and Nickrent,D.L.	Am. J. Bot. 95 (8), 1015-1029 (2008)	Lorantheae	Amyeminae	Amyema	genomic DNA	Chloroplast	530	trnL/LF
Amyema maidenii	HM116952	UNKNOWN	Amyema maidenii internal transcribed spacer 1, 5.8S ribosomal RNA gene, and internal transcribed spacer 2, complete sequence.	Goldie,X., Gillman,L., Crisp,M. and Wright,S.	Proc. Biol. Sci. 277 (1694), 2645-2653 (2010)	Lorantheae	Amyeminae	Amyema	genomic DNA	Nucleolus	806	ITS1; 5.8S; ITS2
Amyema quaternifolium	DQ110143	Jensensen 1360 A	Amyema quaternifolia F1-ATPase alpha subunit-like (atp1) gene, partial sequence; mitochondrial.	Davis,C.C., Anderson,W.R. and Wurdack,K.J.	Proc. Biol. Sci. 272 (1578), 2237-2242 (2005)	Lorantheae	Amyeminae	Amyema	genomic DNA	Mitochondrion	1017	atp1
Amyema quaternifolium	DQ110225	Jensensen 1360, A	Amyema quaternifolia NADH dehydrogenase subunit 1 (NADH1) gene, partial sequence; mitochondrial.	Davis,C.C., Anderson,W.R. and Wurdack,K.J.	Proc. Biol. Sci. 272 (1578), 2237-2242 (2005)	Lorantheae	Amyeminae	Amyema	genomic DNA	Mitochondrion	1610	nad1
Amyema quaternifolium	DQ110298	Jensensen 1360 A	Amyema quaternifolium voucher Jensensen 1360 A maturase (matR) gene, partial cds; mitochondrial.	Davis,C.C., Anderson,W.R. and Wurdack,K.J.	Proc. Biol. Sci. 272 (1578), 2237-2242 (2005)	Lorantheae	Amyeminae	Amyema	genomic DNA	Mitochondrion	1775	matR
Amyema queenslandicum	DQ333834	Calvin and Wilson AU02-22	Amyema queenslandica internal transcribed spacer 1, partial sequence; 5.8S ribosomal RNA gene, complete sequence; and internal transcribed spacer 2, partial sequence.	Wilson,C.A. and Calvin,C.L.	Am. J. Bot. 93 (5), 787-796 (2006)	Lorantheae	Amyeminae	Amyema	genomic DNA	Nucleolus	553	ITS1; 5.8S; ITS2
Amyema queenslandicum	DQ340583	Calvin and Wilson AU02-22	Amyema queenslandica tRNA-Leu (trnL) gene and trnL-trnF intergenic spacer, partial sequence; chloroplast.	Wilson,C.A. and Calvin,C.L.	Am. J. Bot. 93 (5), 787-796 (2006)	Lorantheae	Amyeminae	Amyema	genomic DNA	Chloroplast	610	trnL/LF
Amyema queenslandicum	EU544315	Nickrent 2788	Amyema queenslandicum voucher Nickrent 2788 small subunit ribosomal RNA gene, partial sequence.	Vidal-Russell,R. and Nickrent,D.L.	Am. J. Bot. 95 (8), 1015-1029 (2008)	Lorantheae	Amyeminae	Amyema	genomic DNA	Nucleolus	1674	18S
Amyema queenslandicum	EU544355	Nickrent 2788	Amyema queenslandicum voucher Nickrent 2788 26S ribosomal RNA gene, partial sequence.	Vidal-Russell,R. and Nickrent,D.L.	Am. J. Bot. 95 (8), 1015-1029 (2008)	Lorantheae	Amyeminae	Amyema	genomic DNA	Nucleolus	1982	25S
Amyema queenslandicum	EU544412	Nickrent 2788	Amyema queenslandicum voucher Nickrent 2788 maturase K (matK) gene, partial cds; chloroplast.	Vidal-Russell,R. and Nickrent,D.L.	Am. J. Bot. 95 (8), 1015-1029 (2008)	Lorantheae	Amyeminae	Amyema	genomic DNA	Chloroplast	1341	matK
Amyema sp.	DQ110163	Takeuichi 4325 A	Amyema sp. Takeuichi 4325 ATPase subunit 6 (atp6) gene, partial cds; mitochondrial.	Davis,C.C., Anderson,W.R. and Wurdack,K.J.	Proc. Biol. Sci. 272 (1578), 2237-2242 (2005)	Lorantheae	Amyeminae	Amyema	genomic DNA	Mitochondrion	633	atp6
Amylotheca duthieana	EU544316	Nickrent 4022	Amylotheca duthieana voucher Nickrent 4022 small subunit ribosomal RNA gene, partial sequence.	Vidal-Russell,R. and Nickrent,D.L.	Am. J. Bot. 95 (8), 1015-1029 (2008)	Elytrantheae	[n/a]	Amylotheca	genomic DNA	Nucleolus	1038	18S
Amylotheca duthieana	EU544356	Nickrent 4022	Amylotheca duthieana voucher Nickrent 4022 26S ribosomal RNA gene, partial sequence.	Vidal-Russell,R. and Nickrent,D.L.	Am. J. Bot. 95 (8), 1015-1029 (2008)	Elytrantheae	[n/a]	Amylotheca	genomic DNA	Nucleolus	2106	25S
Amylotheca duthieana	EU544413	Nickrent 4022	Amylotheca duthieana voucher Nickrent 4022 maturase K (matK) gene, complete cds; chloroplast.	Vidal-Russell,R. and Nickrent,D.L.	Am. J. Bot. 95 (8), 1015-1029 (2008)	Elytrantheae	[n/a]	Amylotheca	genomic DNA	Chloroplast	1533	matK
Amylotheca duthieana	EU544477	Nickrent 4022	Amylotheca duthieana voucher Nickrent 4022 tRNA-Leu (trnL) gene, partial sequence; trnL-trnF intergenic spacer, complete sequence; and tRNA-Phe (trnF) gene, partial sequence; chloroplast.	Vidal-Russell,R. and Nickrent,D.L.	Am. J. Bot. 95 (8), 1015-1029 (2008)	Elytrantheae	[n/a]	Amylotheca	genomic DNA	Chloroplast	630	trnL/LF
Amylotheca subumbellata	DQ333849	Calvin and Wilson AU98-21	Amylotheca subumbellata internal transcribed spacer 1, partial sequence; 5.8S ribosomal RNA gene, complete sequence; and internal transcribed spacer 2, partial sequence.	Wilson,C.A. and Calvin,C.L.	Am. J. Bot. 93 (5), 787-796 (2006)	Elytrantheae	[n/a]	Amylotheca	genomic DNA	Nucleolus	673	ITS1; 5.8S; ITS2
Amylotheca subumbellata	DQ340600	Calvin and Wilson AU98-21	Amylotheca subumbellata tRNA-Leu (trnL) gene and trnL-trnF intergenic spacer, partial sequence; chloroplast.	Wilson,C.A. and Calvin,C.L.	Am. J. Bot. 93 (5), 787-796 (2006)	Elytrantheae	[n/a]	Amylotheca	genomic DNA	Chloroplast	596	trnL/LF
Atkinsonia ligustrina	DQ333865	Calvin and Wilson AU00-01	Atkinsonia ligustrina internal transcribed spacer 1, partial sequence; 5.8S ribosomal RNA gene, complete sequence; and internal transcribed spacer 2, partial sequence.	Wilson,C.A. and Calvin,C.L.	Am. J. Bot. 93 (5), 787-796 (2006)	Gaiadendreae	[n/a]	Atkinsonia	genomic DNA	Nucleolus	666	ITS1; 5.8S; ITS2
Atkinsonia ligustrina	DQ340616	Calvin and Wilson AU00-01	Atkinsonia ligustrina tRNA-Leu (trnL) gene and trnL-trnF intergenic spacer, partial sequence; chloroplast.	Wilson,C.A. and Calvin,C.L.	Am. J. Bot. 93 (5), 787-796 (2006)	Gaiadendreae	[n/a]	Atkinsonia	genomic DNA	Chloroplast	689	trnL/LF
Atkinsonia ligustrina	DQ787444	Nickrent 4343	Atkinsonia ligustrina maturase K (matK) gene, partial cds; chloroplast.	Vidal-Russell,R. and Nickrent,D.L.	Syst. Bot. 32 (3), 560-568 (2007)	Gaiadendreae	[n/a]	Atkinsonia	genomic DNA	Chloroplast	1338	matK
Atkinsonia ligustrina	DQ788714	Nickrent 4343	Atkinsonia ligustrina tRNA-Leu (trnL) gene, partial sequence; trnL-trnF intergenic spacer, complete sequence; and tRNA-Phe (trnF) gene, partial sequence; chloroplast.	Vidal-Russell,R. and Nickrent,D.L.	Syst. Bot. 32 (3), 560-568 (2007)	Gaiadendreae	[n/a]	Atkinsonia	genomic DNA	Chloroplast	647	trnL/LF
Atkinsonia ligustrina	EF464464	Nickrent 4344	Atkinsonia ligustrina 18S ribosomal RNA gene, partial sequence.	Vidal-Russell,R. and Nickrent,D.L.	Mol. Phylogenet. Evol. 47 (2), 523-537 (2008)	Gaiadendreae	[n/a]	Atkinsonia	genomic DNA	Nucleolus	1683	18S
Atkinsonia ligustrina	EF464475	Nickrent 4344	Atkinsonia ligustrina 26S ribosomal RNA gene, partial sequence.	Vidal-Russell,R. and Nickrent,D.L.	Mol. Phylogenet. Evol. 47 (2), 523-537 (2008)	Gaiadendreae	[n/a]	Atkinsonia	genomic DNA	Nucleolus	776	25S
Atkinsonia ligustrina	EF464526	Nickrent 4344	Atkinsonia ligustrina ribulose-1,5-bisphosphate carboxylase/oxygenase large subunit (rbcL) gene, partial cds; chloroplast.	Vidal-Russell,R. and Nickrent,D.L.	Mol. Phylogenet. Evol. 47 (2), 523-537 (2008)	Gaiadendreae	[n/a]	Atkinsonia	genomic DNA	Chloroplast	699	rbcL
Bakerella sp.	EU544318	Nickrent 4161	Bakerella sp. Nickrent 4161 small subunit ribosomal RNA gene, partial sequence.	Vidal-Russell,R. and Nickrent,D.L.	Am. J. Bot. 95 (8), 1015-1029 (2008)	Lorantheae	Tapinanthinae	Bakerella	genomic DNA	Nucleolus	1696	18S
Bakerella sp.	EU544358	Nickrent 4161	Bakerella sp. Nickrent 4161 26S ribosomal RNA gene, partial sequence.	Vidal-Russell,R. and Nickrent,D.L.	Am. J. Bot. 95 (8), 1015-1029 (2008)	Lorantheae	Tapinanthinae	Bakerella	genomic DNA	Nucleolus	2057	25S
Bakerella sp.	EU544415	Nickrent 4161	Bakerella sp. Nickrent 4161 maturase K (matK) gene, partial cds; chloroplast.	Vidal-Russell,R. and Nickrent,D.L.	Am. J. Bot. 95 (8), 1015-1029 (2008)	Lorantheae	Tapinanthinae	Bakerella	genomic DNA	Chloroplast	1450	matK
Bakerella sp.	EU544466	Nickrent 4161	Bakerella sp. Nickrent 4161 ribulose-1,5-bisphosphate carboxylase/oxygenase large subunit (rbcL) gene, partial cds; chloroplast.	Vidal-Russell,R. and Nickrent,D.L.	Unpublished	Lorantheae	Tapinanthinae	Bakerella	genomic DNA	Chloroplast	1389	rbcL
Bakerella sp.	EU544479	Nickrent 4161	Bakerella sp. Nickrent 4161 tRNA-Leu (trnL) gene, partial sequence; trnL-trnF intergenic spacer, complete sequence; and tRNA-Phe (trnF) gene, partial sequence; chloroplast.	Vidal-Russell,R. and Nickrent,D.L.	Am. J. Bot. 95 (8), 1015-1029 (2008)	Lorantheae	Tapinanthinae	Bakerella	genomic DNA	Chloroplast	592	trnL/LF
Baratranthus axanthus	DQ333838	Calvin and Wilson B02-14	Baratranthus axanthus internal transcribed spacer 1, partial sequence; 5.8S ribosomal RNA gene, complete sequence; and internal transcribed spacer 2, partial sequence.	Wilson,C.A. and Calvin,C.L.	Am. J. Bot. 93 (5), 787-796 (2006)	Lorantheae	Amyeminae	Baratranthus	genomic DNA	Nucleolus	617	ITS1; 5.8S; ITS2
Baratranthus axanthus	DQ340587	Calvin and Wilson B02-14	Baratranthus axanthus tRNA-Leu (trnL) gene and trnL-trnF intergenic spacer, partial sequence; chloroplast.	Wilson,C.A. and Calvin,C.L.	Am. J. Bot. 93 (5), 787-796 (2006)	Lorantheae	Amyeminae	Baratranthus	genomic DNA	Chloroplast	646	trnL/LF
Baratranthus axanthus	EU544317	Nickrent 4029	Barathranthus axanthus voucher Nickrent 4029 small subunit ribosomal RNA gene, partial sequence.	Vidal-Russell,R. and Nickrent,D.L.	Am. J. Bot. 95 (8), 1015-1029 (2008)	Lorantheae	Amyeminae	Baratranthus	genomic DNA	Nucleolus	1676	18S
Baratranthus axanthus	EU544357	Nickrent 4029	Barathranthus axanthus voucher Nickrent 4029 26S ribosomal RNA gene, partial sequence.	Vidal-Russell,R. and Nickrent,D.L.	Am. J. Bot. 95 (8), 1015-1029 (2008)	Lorantheae	Amyeminae	Baratranthus	genomic DNA	Nucleolus	2037	25S
Baratranthus axanthus	EU544414	Nickrent 4029	Barathranthus axanthus voucher Nickrent 4029 maturase K (matK) gene, partial cds; chloroplast.	Vidal-Russell,R. and Nickrent,D.L.	Am. J. Bot. 95 (8), 1015-1029 (2008)	Lorantheae	Amyeminae	Baratranthus	genomic DNA	Chloroplast	1312	matK
Baratranthus axanthus	EU544478	Nickrent 4029	Barathranthus axanthus voucher Nickrent 4029 tRNA-Leu (trnL) gene, partial sequence; trnL-trnF intergenic spacer, complete sequence; and tRNA-Phe (trnF) gene, partial sequence; chloroplast.	Vidal-Russell,R. and Nickrent,D.L.	Am. J. Bot. 95 (8), 1015-1029 (2008)	Lorantheae	Amyeminae	Baratranthus	genomic DNA	Chloroplast	615	trnL/LF
Benthamina alyxifolia	AY957440	Nickrent 4127	Benthamina alyxifolia ribulose-1,5-bisphosphate carboxylase/oxygenase large subunit (rbcL) gene, partial cds; chloroplast.	Nickrent,D.L., Der,J.P. and Anderson,F.E.	BMC Evol. Biol. 5, 38 (2005)	Lorantheae	Amyeminae	Benthamina	genomic DNA	Chloroplast	1395	rbcL
Benthamina alyxifolia	DQ333835	Calvin and Wilson AU99-14	Benthamina alyxifolia internal transcribed spacer 1, partial sequence; 5.8S ribosomal RNA gene, complete sequence; and internal transcribed spacer 2, partial sequence.	Wilson,C.A. and Calvin,C.L.	Am. J. Bot. 93 (5), 787-796 (2006)	Lorantheae	Amyeminae	Benthamina	genomic DNA	Nucleolus	643	ITS1; 5.8S; ITS2
Benthamina alyxifolia	DQ340584	Calvin and Wilson AU99-14	Benthamina alyxifolia tRNA-Leu (trnL) gene and trnL-trnF intergenic spacer, partial sequence; chloroplast.	Wilson,C.A. and Calvin,C.L.	Am. J. Bot. 93 (5), 787-796 (2006)	Lorantheae	Amyeminae	Benthamina	genomic DNA	Chloroplast	644	trnL/LF
Benthamina alyxifolia	EU544319	Nickrent 4127	Benthamina alyxifolia voucher Nickrent 4127 small subunit ribosomal RNA gene, partial sequence.	Vidal-Russell,R. and Nickrent,D.L.	Am. J. Bot. 95 (8), 1015-1029 (2008)	Lorantheae	Amyeminae	Benthamina	genomic DNA	Nucleolus	1769	18S
Benthamina alyxifolia	EU544359	Nickrent 4127	Benthamina alyxifolia voucher Nickrent 4127 26S ribosomal RNA gene, partial sequence.	Vidal-Russell,R. and Nickrent,D.L.	Am. J. Bot. 95 (8), 1015-1029 (2008)	Lorantheae	Amyeminae	Benthamina	genomic DNA	Nucleolus	2082	25S
Benthamina alyxifolia	EU544416	Nickrent 4127	Benthamina alyxifolia voucher Nickrent 4127 maturase K-like (matK) gene, partial sequence; chloroplast.	Vidal-Russell,R. and Nickrent,D.L.	Am. J. Bot. 95 (8), 1015-1029 (2008)	Lorantheae	Amyeminae	Benthamina	genomic DNA	Chloroplast	1432	matK
Benthamina alyxifolia	EU544480	Nickrent 4127	Benthamina alyxifolia voucher Nickrent 4127 tRNA-Leu (trnL) gene, partial sequence; trnL-trnF intergenic spacer, complete sequence; and tRNA-Phe (trnF) gene, partial sequence; chloroplast.	Vidal-Russell,R. and Nickrent,D.L.	Am. J. Bot. 95 (8), 1015-1029 (2008)	Lorantheae	Amyeminae	Benthamina	genomic DNA	Chloroplast	654	trnL/LF
Benthamina sp.	AB586377	UNKNOWN	Benthamina sp. SH-2010 chloroplast gene for ribulose-1,5-bisphosphate carboxylase/oxygenase large subunit, partial cds, isolate: A250.	Tobe,H., Shinohara,W., Utani,N., Wiriadinata,H., Girmansyah,D.,	Unpublished	Lorantheae	Amyeminae	Benthamina	genomic DNA	Chloroplast	1283	rbcL
Benthamina sp.	AB586378	UNKNOWN	Benthamina sp. SH-2010 chloroplast gene for ribulose-1,5-bisphosphate carboxylase/oxygenase large subunit, partial cds, isolate: A269.	Tobe,H., Shinohara,W., Utani,N., Wiriadinata,H., Girmansyah,D.,	Unpublished	Lorantheae	Amyeminae	Benthamina	genomic DNA	Chloroplast	1214	rbcL
Benthamina sp.	AB586379	UNKNOWN	Benthamina sp. SH-2010 chloroplast gene for ribulose-1,5-bisphosphate carboxylase/oxygenase large subunit, partial cds, isolate: A286.	Tobe,H., Shinohara,W., Utani,N., Wiriadinata,H., Girmansyah,D.,	Unpublished	Lorantheae	Amyeminae	Benthamina	genomic DNA	Chloroplast	1208	rbcL
Benthamina sp.	AB586380	UNKNOWN	Benthamina sp. SH-2010 chloroplast gene for ribulose-1,5-bisphosphate carboxylase/oxygenase large subunit, partial cds, isolate: T281.	Tobe,H., Shinohara,W., Utani,N., Wiriadinata,H., Girmansyah,D.,	Unpublished	Lorantheae	Amyeminae	Benthamina	genomic DNA	Chloroplast	1266	rbcL
Berhautia senegalensis	EU544320	Nickrent 4576	Berhautia senegalensis voucher Nickrent 4576 small subunit ribosomal RNA gene, partial sequence.	Vidal-Russell,R. and Nickrent,D.L.	Am. J. Bot. 95 (8), 1015-1029 (2008)	Lorantheae	Tapinanthinae	Berhautia	genomic DNA	Nucleolus	1780	18S
Berhautia senegalensis	EU544360	Nickrent 4576	Berhautia senegalensis voucher Nickrent 4576 26S ribosomal RNA gene, partial sequence.	Vidal-Russell,R. and Nickrent,D.L.	Am. J. Bot. 95 (8), 1015-1029 (2008)	Lorantheae	Tapinanthinae	Berhautia	genomic DNA	Nucleolus	2099	25S
Berhautia senegalensis	EU544417	Nickrent 4576	Berhautia senegalensis voucher Nickrent 4576 maturase K (matK) gene, partial cds; chloroplast.	Vidal-Russell,R. and Nickrent,D.L.	Am. J. Bot. 95 (8), 1015-1029 (2008)	Lorantheae	Tapinanthinae	Berhautia	genomic DNA	Chloroplast	1364	matK
Cecarria obtusifolia	DQ333836	Calvin and Wilson AU02-16	Cecarria obtusifolia internal transcribed spacer 1, partial sequence; 5.8S ribosomal RNA gene, complete sequence; and internal transcribed spacer 2, partial sequence.	Wilson,C.A. and Calvin,C.L.	Am. J. Bot. 93 (5), 787-796 (2006)	Lorantheae	Loranthinae	Cecarria	genomic DNA	Nucleolus	637	ITS1; 5.8S; ITS2
Cecarria obtusifolia	DQ340585	Calvin and Wilson AU02-16	Cecarria obtusifolia tRNA-Leu (trnL) gene and trnL-trnF intergenic spacer, partial sequence; chloroplast.	Wilson,C.A. and Calvin,C.L.	Am. J. Bot. 93 (5), 787-796 (2006)	Lorantheae	Loranthinae	Cecarria	genomic DNA	Chloroplast	528	trnL/LF
Cecarria obtusifolia	EU544321	Nickrent 4562	Cecarria obtusifolia voucher Nickrent 4562 small subunit ribosomal RNA gene, partial sequence.	Vidal-Russell,R. and Nickrent,D.L.	Am. J. Bot. 95 (8), 1015-1029 (2008)	Lorantheae	Loranthinae	Cecarria	genomic DNA	Nucleolus	1778	18S
Cecarria obtusifolia	EU544361	Nickrent 4562	Cecarria obtusifolia voucher Nickrent 4562 26S ribosomal RNA gene, partial sequence.	Vidal-Russell,R. and Nickrent,D.L.	Am. J. Bot. 95 (8), 1015-1029 (2008)	Lorantheae	Loranthinae	Cecarria	genomic DNA	Nucleolus	1806	25S
Cecarria obtusifolia	EU544418	Nickrent 4562	Cecarria obtusifolia voucher Nickrent 4562 maturase K-like (matK) gene, partial sequence; chloroplast.	Vidal-Russell,R. and Nickrent,D.L.	Am. J. Bot. 95 (8), 1015-1029 (2008)	Lorantheae	Loranthinae	Cecarria	genomic DNA	Chloroplast	612	matK
Cecarria obtusifolia	EU544467	Nickrent 4562	Cecarria obtusifolia voucher Nickrent 4562 ribulose-1,5-bisphosphate carboxylase/oxygenase large subunit (rbcL) gene, partial cds; chloroplast.	Vidal-Russell,R. and Nickrent,D.L.	Unpublished	Lorantheae	Loranthinae	Cecarria	genomic DNA	Chloroplast	676	rbcL
Cecarria obtusifolia	EU544481	Nickrent 4562	Cecarria obtusifolia voucher Nickrent 4562 tRNA-Leu (trnL) gene, partial sequence; trnL-trnF intergenic spacer, complete sequence; and tRNA-Phe (trnF) gene, partial sequence; chloroplast.	Vidal-Russell,R. and Nickrent,D.L.	Am. J. Bot. 95 (8), 1015-1029 (2008)	Lorantheae	Loranthinae	Cecarria	genomic DNA	Chloroplast	479	trnL/LF
Cladocolea cupulata	DQ333861	Calvin and Wilson MX03-08	Cladocolea cupulata internal transcribed spacer 1, partial sequence; 5.8S ribosomal RNA gene, complete sequence; and internal transcribed spacer 2, partial sequence.	Wilson,C.A. and Calvin,C.L.	Am. J. Bot. 93 (5), 787-796 (2006)	Psittacantheae	Psittacanthinae	Cladocolea	genomic DNA	Nucleolus	665	ITS1; 5.8S; ITS2
Cladocolea cupulata	DQ340612	Calvin and Wilson MX03-08	Cladocolea cupulata tRNA-Leu (trnL) gene and trnL-trnF intergenic spacer, partial sequence; chloroplast.	Wilson,C.A. and Calvin,C.L.	Am. J. Bot. 93 (5), 787-796 (2006)	Psittacantheae	Psittacanthinae	Cladocolea	genomic DNA	Chloroplast	696	trnL/LF
Cladocolea gracilis	EU544322	Nickrent 3066	Cladocolea gracilis voucher Nickrent 3066 small subunit ribosomal RNA gene, partial sequence.	Vidal-Russell,R. and Nickrent,D.L.	Am. J. Bot. 95 (8), 1015-1029 (2008)	Psittacantheae	Psittacanthinae	Cladocolea	genomic DNA	Nucleolus	1665	18S
Cladocolea gracilis	EU544362	Nickrent 3066	Cladocolea gracilis voucher Nickrent 3066 26S ribosomal RNA gene, partial sequence.	Vidal-Russell,R. and Nickrent,D.L.	Am. J. Bot. 95 (8), 1015-1029 (2008)	Psittacantheae	Psittacanthinae	Cladocolea	genomic DNA	Nucleolus	1831	25S
Cladocolea gracilis	EU544419	Nickrent 3066	Cladocolea gracilis voucher Nickrent 3066 maturase K (matK) gene, partial cds; chloroplast.	Vidal-Russell,R. and Nickrent,D.L.	Am. J. Bot. 95 (8), 1015-1029 (2008)	Psittacantheae	Psittacanthinae	Cladocolea	genomic DNA	Chloroplast	1319	matK
Cladocolea gracilis	EU544482	Nickrent 3066	Cladocolea gracilis voucher Nickrent 3066 tRNA-Leu (trnL) gene, partial sequence; trnL-trnF intergenic spacer, complete sequence; and tRNA-Phe (trnF) gene, partial sequence; chloroplast.	Vidal-Russell,R. and Nickrent,D.L.	Am. J. Bot. 95 (8), 1015-1029 (2008)	Psittacantheae	Psittacanthinae	Cladocolea	genomic DNA	Chloroplast	634	trnL/LF
Cladocolea mcvaughii	DQ333860	Calvin and Wilson MX03-09	Cladocolea mcvaughii internal transcribed spacer 1, partial sequence; 5.8S ribosomal RNA gene, complete sequence; and internal transcribed spacer 2, partial sequence.	Wilson,C.A. and Calvin,C.L.	Am. J. Bot. 93 (5), 787-796 (2006)	Psittacantheae	Psittacanthinae	Cladocolea	genomic DNA	Nucleolus	665	ITS1; 5.8S; ITS2
Cladocolea mcvaughii	DQ340611	Calvin and Wilson MX03-09	Cladocolea mcvaughii tRNA-Leu (trnL) gene and trnL-trnF intergenic spacer, partial sequence; chloroplast.	Wilson,C.A. and Calvin,C.L.	Am. J. Bot. 93 (5), 787-796 (2006)	Psittacantheae	Psittacanthinae	Cladocolea	genomic DNA	Chloroplast	645	trnL/LF
Dactyliophora novae-guineae	DQ333837	Calvin and Wilson AU02-10	Dactyliophora novae-guineae internal transcribed spacer 1, partial sequence; 5.8S ribosomal RNA gene, complete sequence; and internal transcribed spacer 2, partial sequence.	Wilson,C.A. and Calvin,C.L.	Am. J. Bot. 93 (5), 787-796 (2006)	Lorantheae	Amyeminae	Dactyliophora	genomic DNA	Nucleolus	589	ITS1; 5.8S; ITS2
Dactyliophora novae-guineae	DQ340586	Calvin and Wilson AU02-10	Dactyliophora novae-guineae tRNA-Leu (trnL) gene and trnL-trnF intergenic spacer, partial sequence; chloroplast.	Wilson,C.A. and Calvin,C.L.	Am. J. Bot. 93 (5), 787-796 (2006)	Lorantheae	Amyeminae	Dactyliophora	genomic DNA	Chloroplast	633	trnL/LF
Dactyliophora novae-guineae	EU544323	Nickrent 4563	Dactyliophora novae-guineae voucher Nickrent 4563 small subunit ribosomal RNA gene, partial sequence.	Vidal-Russell,R. and Nickrent,D.L.	Am. J. Bot. 95 (8), 1015-1029 (2008)	Lorantheae	Amyeminae	Dactyliophora	genomic DNA	Nucleolus	1232	18S
Dactyliophora novae-guineae	EU544363	Nickrent 4563	Dactyliophora novae-guineae voucher Nickrent 4563 26S ribosomal RNA gene, partial sequence.	Vidal-Russell,R. and Nickrent,D.L.	Am. J. Bot. 95 (8), 1015-1029 (2008)	Lorantheae	Amyeminae	Dactyliophora	genomic DNA	Nucleolus	1735	25S
Dactyliophora novae-guineae	EU544420	Nickrent 4563	Dactyliophora novae-guineae voucher Nickrent 4563 maturase K-like (matK) gene, partial sequence; chloroplast.	Vidal-Russell,R. and Nickrent,D.L.	Am. J. Bot. 95 (8), 1015-1029 (2008)	Lorantheae	Amyeminae	Dactyliophora	genomic DNA	Chloroplast	1431	matK
Dactyliophora novae-guineae	EU544483	Nickrent 4563	Dactyliophora novae-guineae voucher Nickrent 4563 tRNA-Leu (trnL) gene, partial sequence; trnL-trnF intergenic spacer, complete sequence; and tRNA-Phe (trnF) gene, partial sequence; chloroplast.	Vidal-Russell,R. and Nickrent,D.L.	Am. J. Bot. 95 (8), 1015-1029 (2008)	Lorantheae	Amyeminae	Dactyliophora	genomic DNA	Chloroplast	592	trnL/LF
Decaisnina brittenii	DQ333844	Calvin and Wilson AU01-11	Decaisnina brittenii internal transcribed spacer 1, partial sequence; 5.8S ribosomal RNA gene, complete sequence; and internal transcribed spacer 2, partial sequence.	Wilson,C.A. and Calvin,C.L.	Am. J. Bot. 93 (5), 787-796 (2006)	Elytrantheae	[n/a]	Decaisnina	genomic DNA	Nucleolus	850	ITS1; 5.8S; ITS2
Decaisnina brittenii	DQ340595	Calvin and Wilson AU01-11	Decaisnina brittenii tRNA-Leu (trnL) gene and trnL-trnF intergenic spacer, partial sequence; chloroplast.	Wilson,C.A. and Calvin,C.L.	Am. J. Bot. 93 (5), 787-796 (2006)	Elytrantheae	[n/a]	Decaisnina	genomic DNA	Chloroplast	659	trnL/LF
Decaisnina congesta	DQ333843	Calvin and Wilson AU02-01	Decaisnina congesta internal transcribed spacer 1, partial sequence; 5.8S ribosomal RNA gene, complete sequence; and internal transcribed spacer 2, partial sequence.	Wilson,C.A. and Calvin,C.L.	Am. J. Bot. 93 (5), 787-796 (2006)	Elytrantheae	[n/a]	Decaisnina	genomic DNA	Nucleolus	749	ITS1; 5.8S; ITS2
Decaisnina congesta	DQ340594	Calvin and Wilson AU02-01	Decaisnina congesta tRNA-Leu (trnL) gene and trnL-trnF intergenic spacer, partial sequence; chloroplast.	Wilson,C.A. and Calvin,C.L.	Am. J. Bot. 93 (5), 787-796 (2006)	Elytrantheae	[n/a]	Decaisnina	genomic DNA	Chloroplast	651	trnL/LF
Decaisnina hollrungii	AF039074	UNKNOWN	Decaisnina hollrungii 18S ribosomal RNA gene, partial sequence.	Nickrent,D.L. and Duff,R.J.	(in) Moreno,M.T., Cubero,J.I., Berner,D., Joel,D., Musselman,L.J.	Elytrantheae	[n/a]	Decaisnina	genomic DNA	Nucleolus	1769	18S
Decaisnina signata	DQ333845	Calvin and Wilson AU02-05	Decaisnina signata internal transcribed spacer 1, partial sequence; 5.8S ribosomal RNA gene, complete sequence; and internal transcribed spacer 2, partial sequence.	Wilson,C.A. and Calvin,C.L.	Am. J. Bot. 93 (5), 787-796 (2006)	Elytrantheae	[n/a]	Decaisnina	genomic DNA	Nucleolus	745	ITS1; 5.8S; ITS2
Decaisnina signata	DQ340596	Calvin and Wilson AU02-05	Decaisnina signata tRNA-Leu (trnL) gene and trnL-trnF intergenic spacer, partial sequence; chloroplast.	Wilson,C.A. and Calvin,C.L.	Am. J. Bot. 93 (5), 787-796 (2006)	Elytrantheae	[n/a]	Decaisnina	genomic DNA	Chloroplast	610	trnL/LF
Decaisnina triflora	EU544324	Nickrent 4491	Decaisnina triflora voucher Nickrent 4491 small subunit ribosomal RNA gene, partial sequence.	Vidal-Russell,R. and Nickrent,D.L.	Am. J. Bot. 95 (8), 1015-1029 (2008)	Elytrantheae	[n/a]	Decaisnina	genomic DNA	Nucleolus	1575	18S
Decaisnina triflora	EU544364	Nickrent 4491	Decaisnina triflora voucher Nickrent 4491 26S ribosomal RNA gene, partial sequence.	Vidal-Russell,R. and Nickrent,D.L.	Am. J. Bot. 95 (8), 1015-1029 (2008)	Elytrantheae	[n/a]	Decaisnina	genomic DNA	Nucleolus	2046	25S
Decaisnina triflora	EU544421	Nickrent 4491	Decaisnina triflora voucher Nickrent 4491 maturase K (matK) gene, partial cds; chloroplast.	Vidal-Russell,R. and Nickrent,D.L.	Am. J. Bot. 95 (8), 1015-1029 (2008)	Elytrantheae	[n/a]	Decaisnina	genomic DNA	Chloroplast	1291	matK
Decaisnina triflora	EU544468	Nickrent 4491	Decaisnina triflora voucher Nickrent 4491 ribulose-1,5-bisphosphate carboxylase/oxygenase large subunit (rbcL) gene, partial cds; chloroplast.	Vidal-Russell,R. and Nickrent,D.L.	Unpublished	Elytrantheae	[n/a]	Decaisnina	genomic DNA	Chloroplast	830	rbcL
Decaisnina triflora	EU544484	Nickrent 4491	Decaisnina triflora voucher Nickrent 4491 tRNA-Leu (trnL) gene, partial sequence; trnL-trnF intergenic spacer, complete sequence; and tRNA-Phe (trnF) gene, partial sequence; chloroplast.	Vidal-Russell,R. and Nickrent,D.L.	Am. J. Bot. 95 (8), 1015-1029 (2008)	Elytrantheae	[n/a]	Decaisnina	genomic DNA	Chloroplast	583	trnL/LF
Dendropemon bicolor	AF039075	UNKNOWN	Dendropemon bicolor 18S ribosomal RNA gene, partial sequence.	Nickrent,D.L. and Duff,R.J.	(in) Moreno,M.T., Cubero,J.I., Berner,D., Joel,D., Musselman,L.J.	Psittacantheae	Psittacanthinae	Dendropemon	genomic DNA	Nucleolus	1755	18S
Dendropemon bicolor	EU544365	Nickrent 2172	Dendropemon bicolor voucher Nickrent 2172 26S ribosomal RNA gene, partial sequence.	Vidal-Russell,R. and Nickrent,D.L.	Am. J. Bot. 95 (8), 1015-1029 (2008)	Psittacantheae	Psittacanthinae	Dendropemon	genomic DNA	Nucleolus	1795	25S
Dendropemon bicolor	EU544422	Nickrent 2172	Dendropemon bicolor voucher Nickrent 2172 maturase K (matK) gene, partial cds; chloroplast.	Vidal-Russell,R. and Nickrent,D.L.	Am. J. Bot. 95 (8), 1015-1029 (2008)	Psittacantheae	Psittacanthinae	Dendropemon	genomic DNA	Chloroplast	1356	matK
Dendropemon bicolor	EU544469	Nickrent 2700	Dendropemon bicolor voucher Nickrent 2700 ribulose-1,5-bisphosphate carboxylase/oxygenase large subunit (rbcL) gene, partial cds; chloroplast.	Vidal-Russell,R. and Nickrent,D.L.	Unpublished	Psittacantheae	Psittacanthinae	Dendropemon	genomic DNA	Chloroplast	1134	rbcL
Dendrophthoe constricta	DQ333840	Calvin and Wilson B02-03	Dendrophthoe constricta internal transcribed spacer 1, partial sequence; 5.8S ribosomal RNA gene, complete sequence; and internal transcribed spacer 2, partial sequence.	Wilson,C.A. and Calvin,C.L.	Am. J. Bot. 93 (5), 787-796 (2006)	Lorantheae	Dendrophthoinae	Dendrophthoe	genomic DNA	Nucleolus	638	ITS1; 5.8S; ITS2
Dendrophthoe constricta	DQ340589	Calvin and Wilson B02-03	Dendrophthoe constricta tRNA-Leu (trnL) gene and trnL-trnF intergenic spacer, partial sequence; chloroplast.	Wilson,C.A. and Calvin,C.L.	Am. J. Bot. 93 (5), 787-796 (2006)	Lorantheae	Dendrophthoinae	Dendrophthoe	genomic DNA	Chloroplast	580	trnL/LF
Dendrophthoe curvata	L26491	UNKNOWN	Dendrophthoe curvata 18S ribosomal RNA gene, partial sequence.	Nickrent,D.L.	Unpublished	Lorantheae	Dendrophthoinae	Dendrophthoe	genomic DNA	Nucleolus	1737	18S
Dendrophthoe curvata	AY957441	Nickrent 2787	Dendrophthoe curvata 18S ribosomal RNA gene, partial sequence.	Nickrent,D.L., Der,J.P. and Anderson,F.E.	BMC Evol. Biol. 5, 38 (2005)	Lorantheae	Dendrophthoinae	Dendrophthoe	genomic DNA	Nucleolus	1739	18S
Dendrophthoe curvata	EU544325	Nickrent 4012	Dendrophthoe curvata voucher Nickrent 4012 small subunit ribosomal RNA gene, partial sequence.	Vidal-Russell,R. and Nickrent,D.L.	Am. J. Bot. 95 (8), 1015-1029 (2008)	Lorantheae	Dendrophthoinae	Dendrophthoe	genomic DNA	Nucleolus	1729	18S
Dendrophthoe curvata	EU544367	Nickrent 4012	Dendrophthoe curvata voucher Nickrent 4012 26S ribosomal RNA gene, partial sequence.	Vidal-Russell,R. and Nickrent,D.L.	Am. J. Bot. 95 (8), 1015-1029 (2008)	Lorantheae	Dendrophthoinae	Dendrophthoe	genomic DNA	Nucleolus	1023	25S
Dendrophthoe curvata	EU544424	Nickrent 4012	Dendrophthoe curvata voucher Nickrent 4012 maturase K (matK) gene, partial cds; chloroplast.	Vidal-Russell,R. and Nickrent,D.L.	Am. J. Bot. 95 (8), 1015-1029 (2008)	Lorantheae	Dendrophthoinae	Dendrophthoe	genomic DNA	Chloroplast	1329	matK
Dendrophthoe lanosa	JN687571	A. Chveerach_P38.1	Dendrophthoe lanosa psbA-trnH intergenic spacer, partial sequence; chloroplast.	Kwanda,N., Noikotr,K., Sudmoon,R., Tanee,T. and Chaveerach,A.	J Nat Med (2012) In press	Lorantheae	Dendrophthoinae	Dendrophthoe	genomic DNA	Chloroplast	300	trnH-psbA
Dendrophthoe lanosa	JN687563	A. Chveerach_P38.1	Dendrophthoe lanosa ribulose-1,5-bisphosphate carboxylase/oxygenase large subunit (rbcL) gene, partial cds; chloroplast.	Kwanda,N., Noikotr,K., Sudmoon,R., Tanee,T. and Chaveerach,A.	J Nat Med (2012) In press	Lorantheae	Dendrophthoinae	Dendrophthoe	genomic DNA	Chloroplast	519	rbcL
Dendrophthoe longituba	EU544366	Nickrent 4010	Dendrophthoe longituba voucher Nickrent 4010 26S ribosomal RNA gene, partial sequence.	Vidal-Russell,R. and Nickrent,D.L.	Am. J. Bot. 95 (8), 1015-1029 (2008)	Lorantheae	Dendrophthoinae	Dendrophthoe	genomic DNA	Nucleolus	2037	25S
Dendrophthoe longituba	EU544423	Nickrent 4010	Dendrophthoe longituba voucher Nickrent 4010 maturase K-like (matK) gene, partial sequence; chloroplast.	Vidal-Russell,R. and Nickrent,D.L.	Am. J. Bot. 95 (8), 1015-1029 (2008)	Lorantheae	Dendrophthoinae	Dendrophthoe	genomic DNA	Chloroplast	1452	matK
Dendrophthoe longituba	EU544485	Nickrent 4010	Dendrophthoe longituba voucher Nickrent 4010 tRNA-Leu (trnL) gene, partial sequence; trnL-trnF intergenic spacer, complete sequence; and tRNA-Phe (trnF) gene, partial sequence; chloroplast.	Vidal-Russell,R. and Nickrent,D.L.	Am. J. Bot. 95 (8), 1015-1029 (2008)	Lorantheae	Dendrophthoinae	Dendrophthoe	genomic DNA	Chloroplast	586	trnL/LF
Dendrophthoe nilgherrensis	JQ933297	Chase, 17409, (K)	Dendrophthoe nilgherrensis voucher Chase, 17409, (K) ribulose-1,5-bisphosphate carboxylase/oxygenase large subunit (rbcL) gene, partial cds; plastid.	Saslis-Lagoudakis,C.H., Savolainen,V., Williamson,E.M., Forest,F.,	Proc. Natl. Acad. Sci. U.S.A. 109 (39), 15835-15840 (2012)	Lorantheae	Dendrophthoinae	Dendrophthoe	genomic DNA	Chloroplast	665	rbcL
Dendrophthoe pentandra	AY191132	UNKNOWN	Dendrophthoe pentandra tRNA-Leu (trnL) gene, partial sequence; chloroplast gene for chloroplast product.	Han,R.L., Hao,G. and Zhang,D.X.	Unpublished	Lorantheae	Dendrophthoinae	Dendrophthoe	genomic DNA	Chloroplast	301	trnL/LF
Dendrophthoe pentandra	AY453120	SP15593	Dendrophthoe pentandra maturase (matR) gene, partial cds; mitochondrial.	Barkman,T.J., Lim,S.H., Salleh,K.M. and Nais,J.	Proc. Natl. Acad. Sci. U.S.A. 101 (3), 787-792 (2004)	Lorantheae	Dendrophthoinae	Dendrophthoe	genomic DNA	Mitochondrion	1470	matR
Dendrophthoe pentandra	EU281073	SNP15593 (SNP)	Dendrophthoe pentandra cytochrome oxidase subunit I (coxI) gene, partial cds; mitochondrial.	Barkman,T.J., McNeal,J.R., Lim,S.H., Coat,G., Croom,H.B.,	BMC Evol. Biol. 7, 248 (2007)	Lorantheae	Dendrophthoinae	Dendrophthoe	genomic DNA	Mitochondrion	2385	cox1
Dendrophthoe pentandra	EU280999	SNP15593 (SNP)	Dendrophthoe pentandra atp1 (atp1) gene, partial cds; mitochondrial.	Barkman,T.J., McNeal,J.R., Lim,S.H., Coat,G., Croom,H.B.,	BMC Evol. Biol. 7, 248 (2007)	Lorantheae	Dendrophthoinae	Dendrophthoe	genomic DNA	Mitochondrion	1195	atp1
Dendrophthoe pentandra	DQ110176	Barretto & Hu 23956 A	Dendrophthoe pentandra ATPase subunit 6 (atp6) gene, partial cds; mitochondrial.	Davis,C.C., Anderson,W.R. and Wurdack,K.J.	Proc. Biol. Sci. 272 (1578), 2237-2242 (2005)	Lorantheae	Dendrophthoinae	Dendrophthoe	genomic DNA	Mitochondrion	647	atp6
Dendrophthoe pentandra	DQ110268	Barretto & Hu 23956, A	Dendrophthoe pentandra NADH dehydrogenase subunit 1 (NADH1) gene, partial sequence; mitochondrial.	Davis,C.C., Anderson,W.R. and Wurdack,K.J.	Proc. Biol. Sci. 272 (1578), 2237-2242 (2005)	Lorantheae	Dendrophthoinae	Dendrophthoe	genomic DNA	Mitochondrion	1573	nad1
Dendrophthoe pentandra	DQ110337	Barretto & Hu 23956 A	Dendrophthoe pentandra voucher Barretto & Hu 23956 A maturase (matR) gene, partial cds; mitochondrial.	Davis,C.C., Anderson,W.R. and Wurdack,K.J.	Proc. Biol. Sci. 272 (1578), 2237-2242 (2005)	Lorantheae	Dendrophthoinae	Dendrophthoe	genomic DNA	Mitochondrion	1750	matR
Dendrophthoe pentandra	HQ317759	LS27	Dendrophthoe pentandra voucher LS27 ribulose-1,5-bisphosphate carboxylase/oxygenase large subunit (rbcL) gene, partial cds; chloroplast.	Li,Y.-H., Chen,S.-L., Yao,H. and Luo,K.	Unpublished	Lorantheae	Dendrophthoinae	Dendrophthoe	genomic DNA	Chloroplast	703	rbcL
Dendrophthoe pentandra	HQ317760	LS32	Dendrophthoe pentandra voucher LS32 ribulose-1,5-bisphosphate carboxylase/oxygenase large subunit (rbcL) gene, partial cds; chloroplast.	Li,Y.-H., Chen,S.-L., Yao,H. and Luo,K.	Unpublished	Lorantheae	Dendrophthoinae	Dendrophthoe	genomic DNA	Chloroplast	703	rbcL
Dendrophthoe pentandra	HQ317800	LS27	Dendrophthoe pentandra voucher LS27 PsbA (psbA) gene, partial cds; psbA-trnH intergenic spacer, complete sequence; and tRNA-His (trnH) gene, partial sequence; chloroplast.	Li,Y.-H., Chen,S.-L., Yao,H. and Luo,K.	Unpublished	Lorantheae	Dendrophthoinae	Dendrophthoe	genomic DNA	Chloroplast	309	trnH-psbA
Dendrophthoe pentandra	HQ317801	LS32	Dendrophthoe pentandra voucher LS32 PsbA (psbA) gene, partial cds; psbA-trnH intergenic spacer, complete sequence; and tRNA-His (trnH) gene, partial sequence; chloroplast.	Li,Y.-H., Chen,S.-L., Yao,H. and Luo,K.	Unpublished	Lorantheae	Dendrophthoinae	Dendrophthoe	genomic DNA	Chloroplast	316	trnH-psbA
Dendrophthoe pentandra	JN687572	A. Chveerach_P51.2	Dendrophthoe pentandra psbA-trnH intergenic spacer, partial sequence; chloroplast.	Kwanda,N., Noikotr,K., Sudmoon,R., Tanee,T. and Chaveerach,A.	J Nat Med (2012) In press	Lorantheae	Dendrophthoinae	Dendrophthoe	genomic DNA	Chloroplast	275	trnH-psbA
Dendrophthoe pentandra	JN687564	A. Chveerach_P51.2	Dendrophthoe pentandra ribulose-1,5-bisphosphate carboxylase/oxygenase large subunit (rbcL) gene, partial cds; chloroplast.	Kwanda,N., Noikotr,K., Sudmoon,R., Tanee,T. and Chaveerach,A.	J Nat Med (2012) In press	Lorantheae	Dendrophthoinae	Dendrophthoe	genomic DNA	Chloroplast	519	rbcL
Dendrophthoe vitellina	DQ333839	Calvin and Wilson AU98-08	Dendrophthoe vitellina internal transcribed spacer 1, partial sequence; 5.8S ribosomal RNA gene, complete sequence; and internal transcribed spacer 2, partial sequence.	Wilson,C.A. and Calvin,C.L.	Am. J. Bot. 93 (5), 787-796 (2006)	Lorantheae	Dendrophthoinae	Dendrophthoe	genomic DNA	Nucleolus	584	ITS1; 5.8S; ITS2
Dendrophthoe vitellina	DQ340588	Calvin and Wilson AU98-08	Dendrophthoe vitellina tRNA-Leu (trnL) gene and trnL-trnF intergenic spacer, partial sequence; chloroplast.	Wilson,C.A. and Calvin,C.L.	Am. J. Bot. 93 (5), 787-796 (2006)	Lorantheae	Dendrophthoinae	Dendrophthoe	genomic DNA	Chloroplast	584	trnL/LF
Desmaria mutabilis	DQ333852	Calvin and Wilson CL03-07	Desmaria mutabilis internal transcribed spacer 1, partial sequence; 5.8S ribosomal RNA gene, complete sequence; and internal transcribed spacer 2, partial sequence.	Wilson,C.A. and Calvin,C.L.	Am. J. Bot. 93 (5), 787-796 (2006)	Psittacantheae	Notantherinae	Desmaria	genomic DNA	Nucleolus	662	ITS1; 5.8S; ITS2
Desmaria mutabilis	DQ340603	Calvin and Wilson CL03-07	Desmaria mutabilis tRNA-Leu (trnL) gene and trnL-trnF intergenic spacer, partial sequence; chloroplast.	Wilson,C.A. and Calvin,C.L.	Am. J. Bot. 93 (5), 787-796 (2006)	Psittacantheae	Notantherinae	Desmaria	genomic DNA	Chloroplast	615	trnL/LF
Desmaria mutabilis	EF464465	Nickrent 4510A	Desmaria mutabilis 18S ribosomal RNA gene, partial sequence.	Vidal-Russell,R. and Nickrent,D.L.	Mol. Phylogenet. Evol. 47 (2), 523-537 (2008)	Psittacantheae	Notantherinae	Desmaria	genomic DNA	Nucleolus	1694	18S
Desmaria mutabilis	EF464476	Nickrent 4510A	Desmaria mutabilis 26S ribosomal RNA gene, partial sequence.	Vidal-Russell,R. and Nickrent,D.L.	Mol. Phylogenet. Evol. 47 (2), 523-537 (2008)	Psittacantheae	Notantherinae	Desmaria	genomic DNA	Nucleolus	866	25S
Desmaria mutabilis	EF464486	Nickrent 4510A	Desmaria mutabilis tRNA-Leu (trnL) gene, partial sequence; trnL-trnF intergenic spacer, complete sequence; and tRNA-Phe (trnF) gene, partial sequence; chloroplast.	Vidal-Russell,R. and Nickrent,D.L.	Mol. Phylogenet. Evol. 47 (2), 523-537 (2008)	Psittacantheae	Notantherinae	Desmaria	genomic DNA	Chloroplast	581	trnL/LF
Desmaria mutabilis	EF464527	Nickrent 4510A	Desmaria mutabilis ribulose-1,5-bisphosphate carboxylase/oxygenase large subunit (rbcL) gene, partial cds; chloroplast.	Vidal-Russell,R. and Nickrent,D.L.	Mol. Phylogenet. Evol. 47 (2), 523-537 (2008)	Psittacantheae	Notantherinae	Desmaria	genomic DNA	Chloroplast	731	rbcL
Desmaria mutabilis	EF464509	Nickrent 4510A	Desmaria mutabilis maturase K (matK) gene, partial cds; chloroplast.	Vidal-Russell,R. and Nickrent,D.L.	Mol. Phylogenet. Evol. 47 (2), 523-537 (2008)	Psittacantheae	Notantherinae	Desmaria	genomic DNA	Chloroplast	1127	matK
Diplatia furcata	L24088	UNKNOWN	Diplatia furcata Barlow 18S ribosomal RNA gene, partial sequence.	Nickrent,D.L. and Duff,R.J.	(in) Moreno,M.T., Cubero,J.I., Berner,D., Joel,D., Musselman,L.J.	Lorantheae	Amyeminae	Diplatia	genomic DNA	Nucleolus	1761	18S
Diplatia furcata	EU544368	Nickrent 2824	Diplatia furcata voucher Nickrent 2824 26S ribosomal RNA gene, partial sequence.	Vidal-Russell,R. and Nickrent,D.L.	Am. J. Bot. 95 (8), 1015-1029 (2008)	Lorantheae	Amyeminae	Diplatia	genomic DNA	Nucleolus	2147	25S
Diplatia furcata	EU544425	Nickrent 2824	Diplatia furcata voucher Nickrent 2824 maturase K (matK) gene, partial cds; chloroplast.	Vidal-Russell,R. and Nickrent,D.L.	Am. J. Bot. 95 (8), 1015-1029 (2008)	Lorantheae	Amyeminae	Diplatia	genomic DNA	Chloroplast	1326	matK
Diplatia furcata	EU544486	Nickrent 2824	Diplatia furcata voucher Nickrent 2824 tRNA-Leu (trnL) gene, partial sequence; trnL-trnF intergenic spacer, complete sequence; and tRNA-Phe (trnF) gene, partial sequence; chloroplast.	Vidal-Russell,R. and Nickrent,D.L.	Am. J. Bot. 95 (8), 1015-1029 (2008)	Lorantheae	Amyeminae	Diplatia	genomic DNA	Chloroplast	560	trnL/LF
Diplatia grandibractea	DQ333832	Calvin and Wilson AU01-05	Diplatia grandibractea internal transcribed spacer 1, partial sequence; 5.8S ribosomal RNA gene, complete sequence; and internal transcribed spacer 2, partial sequence.	Wilson,C.A. and Calvin,C.L.	Am. J. Bot. 93 (5), 787-796 (2006)	Lorantheae	Amyeminae	Diplatia	genomic DNA	Nucleolus	652	ITS1; 5.8S; ITS2
Diplatia grandibractea	DQ340581	Calvin and Wilson AU01-05	Diplatia grandibractea tRNA-Leu (trnL) gene and trnL-trnF intergenic spacer, partial sequence; chloroplast.	Wilson,C.A. and Calvin,C.L.	Am. J. Bot. 93 (5), 787-796 (2006)	Lorantheae	Amyeminae	Diplatia	genomic DNA	Chloroplast	593	trnL/LF
Emelianthe panganensis	EU544326	Nickrent 4889	Emelianthe panganensis voucher Nickrent 4889 small subunit ribosomal RNA gene, partial sequence.	Vidal-Russell,R. and Nickrent,D.L.	Am. J. Bot. 95 (8), 1015-1029 (2008)	Lorantheae	Emelianthinae	Emelianthe	genomic DNA	Nucleolus	1661	18S
Emelianthe panganensis	EU544369	Nickrent 4889	Emelianthe panganensis voucher Nickrent 4889 26S ribosomal RNA gene, partial sequence.	Vidal-Russell,R. and Nickrent,D.L.	Am. J. Bot. 95 (8), 1015-1029 (2008)	Lorantheae	Emelianthinae	Emelianthe	genomic DNA	Nucleolus	2038	25S
Emelianthe panganensis	EU544426	Nickrent 4889	Emelianthe panganensis voucher Nickrent 4889 maturase K (matK) gene, partial cds; chloroplast.	Vidal-Russell,R. and Nickrent,D.L.	Am. J. Bot. 95 (8), 1015-1029 (2008)	Lorantheae	Emelianthinae	Emelianthe	genomic DNA	Chloroplast	1317	matK
Emelianthe panganensis	EU544487	Nickrent 4889	Emelianthe panganensis voucher Nickrent 4889 tRNA-Leu (trnL) gene, partial sequence; trnL-trnF intergenic spacer, complete sequence; and tRNA-Phe (trnF) gene, partial sequence; chloroplast.	Vidal-Russell,R. and Nickrent,D.L.	Am. J. Bot. 95 (8), 1015-1029 (2008)	Lorantheae	Emelianthinae	Emelianthe	genomic DNA	Chloroplast	613	trnL/LF
Englerina ramulosa	DQ333828	A. Robertson 7280	Englerina ramulosa internal transcribed spacer 1, partial sequence; 5.8S ribosomal RNA gene, complete sequence; and internal transcribed spacer 2, partial sequence.	Wilson,C.A. and Calvin,C.L.	Am. J. Bot. 93 (5), 787-796 (2006)	Lorantheae	Tapinanthinae	Englerina	genomic DNA	Nucleolus	612	ITS1; 5.8S; ITS2
Englerina ramulosa	DQ340577	A. Robertson 7280	Englerina ramulosa tRNA-Leu (trnL) gene and trnL-trnF intergenic spacer, partial sequence; chloroplast.	Wilson,C.A. and Calvin,C.L.	Am. J. Bot. 93 (5), 787-796 (2006)	Lorantheae	Tapinanthinae	Englerina	genomic DNA	Chloroplast	694	trnL/LF
Englerina ramulosa	EU544370	Nickrent 2984	Englerina ramulosa voucher Nickrent 2984 26S ribosomal RNA gene, partial sequence.	Vidal-Russell,R. and Nickrent,D.L.	Am. J. Bot. 95 (8), 1015-1029 (2008)	Lorantheae	Tapinanthinae	Englerina	genomic DNA	Nucleolus	2047	25S
Englerina ramulosa	EU544427	Nickrent 2984	Englerina ramulosa voucher Nickrent 2984 maturase K-like (matK) gene, partial sequence; chloroplast.	Vidal-Russell,R. and Nickrent,D.L.	Am. J. Bot. 95 (8), 1015-1029 (2008)	Lorantheae	Tapinanthinae	Englerina	genomic DNA	Chloroplast	1349	matK
Englerina ramulosa	EU544470	Nickrent 2984	Englerina ramulosa voucher Nickrent 2984 ribulose-1,5-bisphosphate carboxylase/oxygenase large subunit (rbcL) gene, partial cds; chloroplast.	Vidal-Russell,R. and Nickrent,D.L.	Unpublished	Lorantheae	Tapinanthinae	Englerina	genomic DNA	Chloroplast	833	rbcL
Englerina woodfordioides	L24140	UNKNOWN	Englerina woodfordioides (Schweinf.) M. Gilbert 18S ribosomal RNA gene, partial sequence.	Nickrent,D.L. and Duff,R.J.	(in) Moreno,M.T., Cubero,J.I., Berner,D., Joel,D., Musselman,L.J.	Lorantheae	Tapinanthinae	Englerina	genomic DNA	Nucleolus	1761	18S
Erianthemum dregei	L25679	UNKNOWN	Erianthemum dregei (Eckl. and Zeyh.) Tiegh. 18S ribosomal RNA gene, partial sequence.	Nickrent,D.L. and Duff,R.J.	(in) Moreno,M.T., Cubero,J.I., Berner,D., Joel,D., Musselman,L.J.	Lorantheae	Emelianthinae	Erianthemum	genomic DNA	Nucleolus	1762	18S
Erianthemum dregei	DQ333831	A. Robertson 7366	Erianthemum dregei internal transcribed spacer 1, partial sequence; 5.8S ribosomal RNA gene, complete sequence; and internal transcribed spacer 2, partial sequence.	Wilson,C.A. and Calvin,C.L.	Am. J. Bot. 93 (5), 787-796 (2006)	Lorantheae	Emelianthinae	Erianthemum	genomic DNA	Nucleolus	618	ITS1; 5.8S; ITS2
Erianthemum dregei	DQ340580	A. Robertson 7366	Erianthemum dregei tRNA-Leu (trnL) gene and trnL-trnF intergenic spacer, partial sequence; chloroplast.	Wilson,C.A. and Calvin,C.L.	Am. J. Bot. 93 (5), 787-796 (2006)	Lorantheae	Emelianthinae	Erianthemum	genomic DNA	Chloroplast	651	trnL/LF
Erianthemum dregei	EU544371	Nickrent 2985	Erianthemum dregei voucher Nickrent 2985 26S ribosomal RNA gene, partial sequence.	Vidal-Russell,R. and Nickrent,D.L.	Am. J. Bot. 95 (8), 1015-1029 (2008)	Lorantheae	Emelianthinae	Erianthemum	genomic DNA	Nucleolus	2048	25S
Erianthemum dregei	EU544428	Nickrent 2985	Erianthemum dregei voucher Nickrent 2985 maturase K (matK) gene, partial cds; chloroplast.	Vidal-Russell,R. and Nickrent,D.L.	Am. J. Bot. 95 (8), 1015-1029 (2008)	Lorantheae	Emelianthinae	Erianthemum	genomic DNA	Chloroplast	1392	matK
Erianthemum dregei	EU544488	Nickrent 2985	Erianthemum dregei voucher Nickrent 2985 tRNA-Leu (trnL) gene, partial sequence; trnL-trnF intergenic spacer, complete sequence; and tRNA-Phe (trnF) gene, partial sequence; chloroplast.	Vidal-Russell,R. and Nickrent,D.L.	Am. J. Bot. 95 (8), 1015-1029 (2008)	Lorantheae	Emelianthinae	Erianthemum	genomic DNA	Chloroplast	626	trnL/LF
Gaiadendron punctatum	L26072	UNKNOWN	Gaiadendron punctatum ribulose-1,5-bisphosphate carboxylase/oxygenase large subunit (rbcL) gene, partial cds; chloroplast gene for chloroplast product.	Nickrent,D.L. and Soltis,D.E.	Ann. Mo. Bot. Gard. 82 (2), 208-234 (1995)	Gaiadendreae	[n/a]	Gaiadendron	genomic DNA	Chloroplast	1368	rbcL
Gaiadendron punctatum	L24143	UNKNOWN	Gaiadendron punctatum (R. and P.) G. Don 18S ribosomal RNA gene, partial sequence.	Nickrent,D.L. and Soltis,D.E.	Ann. Mo. Bot. Gard. 82 (2), 208-234 (1995)	Gaiadendreae	[n/a]	Gaiadendron	genomic DNA	Nucleolus	1761	18S
Gaiadendron punctatum	DQ333866	Calvin and Wilson CR01-08	Gaiadendron punctatum internal transcribed spacer 1, partial sequence; 5.8S ribosomal RNA gene, complete sequence; and internal transcribed spacer 2, partial sequence.	Wilson,C.A. and Calvin,C.L.	Am. J. Bot. 93 (5), 787-796 (2006)	Gaiadendreae	[n/a]	Gaiadendron	genomic DNA	Nucleolus	675	ITS1; 5.8S; ITS2
Gaiadendron punctatum	DQ340617	Calvin and Wilson CR01-08	Gaiadendron punctatum tRNA-Leu (trnL) gene and trnL-trnF intergenic spacer, partial sequence; chloroplast.	Wilson,C.A. and Calvin,C.L.	Am. J. Bot. 93 (5), 787-796 (2006)	Gaiadendreae	[n/a]	Gaiadendron	genomic DNA	Chloroplast	661	trnL/LF
Gaiadendron punctatum	DQ787445	Nickrent 2729	Gaiadendron punctatum maturase K (matK) gene, partial cds; chloroplast.	Vidal-Russell,R. and Nickrent,D.L.	Syst. Bot. 32 (3), 560-568 (2007)	Gaiadendreae	[n/a]	Gaiadendron	genomic DNA	Chloroplast	1351	matK
Gaiadendron punctatum	DQ788704	Nickrent 2729	Gaiadendron punctatum internal transcribed spacer 1 and 5.8S ribosomal RNA gene, partial sequence.	Vidal-Russell,R. and Nickrent,D.L.	Syst. Bot. 32 (3), 560-568 (2007)	Gaiadendreae	[n/a]	Gaiadendron	genomic DNA	Nucleolus	409	ITS1; 5.8S; ITS2
Gaiadendron punctatum	DQ788715	Nickrent 2729	Gaiadendron punctatum tRNA-Leu (trnL) gene, partial sequence; trnL-trnF intergenic spacer, complete sequence; and tRNA-Phe (trnF) gene, partial sequence; chloroplast.	Vidal-Russell,R. and Nickrent,D.L.	Syst. Bot. 32 (3), 560-568 (2007)	Gaiadendreae	[n/a]	Gaiadendron	genomic DNA	Chloroplast	627	trnL/LF
Gaiadendron punctatum	DQ790209	D. Nickrent 2729	Gaiadendron punctatum 26S ribosomal RNA gene gene, partial sequence.	Vidal-Russell,R. and Nickrent,D.L.	Mol. Phylogenet. Evol. 47 (2), 523-537 (2008)	Gaiadendreae	[n/a]	Gaiadendron	genomic DNA	Nucleolus	877	25S
Gaiadendron punctatum	DQ790238	D. Nickrent 2729	Gaiadendron punctatum voucher D. Nickrent 2729 acetyl co-A carboxylase (accD) gene, partial cds; chloroplast.	Malecot,V.R. and Nickrent,D.L.	Unpublished	Gaiadendreae	[n/a]	Gaiadendron	genomic DNA	Chloroplast	1174	accD
Gaiadendron punctatum	DQ110147	Brummitt 19395 US	Gaiadendron punctatum F1-ATPase alpha subunit (atp1) gene, partial cds; mitochondrial.	Davis,C.C., Anderson,W.R. and Wurdack,K.J.	Proc. Biol. Sci. 272 (1578), 2237-2242 (2005)	Gaiadendreae	[n/a]	Gaiadendron	genomic DNA	Mitochondrion	1022	atp1
Gaiadendron punctatum	DQ110183	Brummitt 19395 US	Gaiadendron punctatum ATPase subunit 6 (atp6) gene, partial cds; mitochondrial.	Davis,C.C., Anderson,W.R. and Wurdack,K.J.	Proc. Biol. Sci. 272 (1578), 2237-2242 (2005)	Gaiadendreae	[n/a]	Gaiadendron	genomic DNA	Mitochondrion	642	atp6
Gaiadendron punctatum	DQ110271	Brummitt 19395, US	Gaiadendron punctatum NADH dehydrogenase subunit 1 (NADH1) gene, partial sequence; mitochondrial.	Davis,C.C., Anderson,W.R. and Wurdack,K.J.	Proc. Biol. Sci. 272 (1578), 2237-2242 (2005)	Gaiadendreae	[n/a]	Gaiadendron	genomic DNA	Mitochondrion	1770	nad1
Gaiadendron punctatum	DQ110339	Brummitt 19395 US	Gaiadendron punctatum voucher Brummitt 19395 US maturase (matR) gene, partial cds; mitochondrial.	Davis,C.C., Anderson,W.R. and Wurdack,K.J.	Proc. Biol. Sci. 272 (1578), 2237-2242 (2005)	Gaiadendreae	[n/a]	Gaiadendron	genomic DNA	Mitochondrion	1741	matR
Gaiadendron punctatum	JF268488	UNKNOWN	Gaiadendron punctatum RNA polymerase beta chain (rpoC2) gene, partial cds; plastid.	Soltis,D.E., Smith,S.A., Cellinese,N., Wurdack,K.J., Tank,D.C.,	Am. J. Bot. 98 (4), 704-730 (2011)	Gaiadendreae	[n/a]	Gaiadendron	genomic DNA	Chloroplast	991	rpoC2
Gaiadendron sp.	GU351212	N. Munoz et al. 102 (MO)	Gaiadendron sp. Munoz et al. 102 MatR (matR) gene, partial cds; mitochondrial.	Qiu,Y.-L., Li,L., Wang,B., Xue,J., Hendry,T.A., Li,R., Brown,J.W.,	J Syst Evol 48, 391-425 (2010)	Gaiadendreae	[n/a]	Gaiadendron	genomic DNA	Mitochondrion	1617	matR
Gaiadendron sp.	GU351409	N. Munoz et al. 102 (MO)	Gaiadendron sp. Munoz et al. 102 NADH dehydrogenase subunit 5 (nad5) gene, partial cds; mitochondrial.	Qiu,Y.-L., Li,L., Wang,B., Xue,J., Hendry,T.A., Li,R., Brown,J.W.,	J Syst Evol 48, 391-425 (2010)	Gaiadendreae	[n/a]	Gaiadendron	genomic DNA	Mitochondrion	1063	nad5
Gaiadendron sp.	GU351664	N. Munoz et al. 102 (MO)	Gaiadendron sp. Munoz et al. 102 ribosomal protein S3 (rps3) gene, partial cds; mitochondrial.	Qiu,Y.-L., Li,L., Wang,B., Xue,J., Hendry,T.A., Li,R., Brown,J.W.,	J Syst Evol 48, 391-425 (2010)	Gaiadendreae	[n/a]	Gaiadendron	genomic DNA	Mitochondrion	1404	rps3
Globimetula dinklagei	AF039076	UNKNOWN	Globimetula dinklagei 18S ribosomal RNA gene, partial sequence.	Nickrent,D.L. and Duff,R.J.	(in) Moreno,M.T., Cubero,J.I., Berner,D., Joel,D., Musselman,L.J.	Lorantheae	Emelianthinae	Globimetula	genomic DNA	Nucleolus	1749	18S
Globimetula dinklagei	EU544372	Nickrent 3087	Globimetula dinklagei voucher Nickrent 3087 26S ribosomal RNA gene, partial sequence.	Vidal-Russell,R. and Nickrent,D.L.	Am. J. Bot. 95 (8), 1015-1029 (2008)	Lorantheae	Emelianthinae	Globimetula	genomic DNA	Nucleolus	2015	25S
Globimetula dinklagei	EU544429	Nickrent 3087	Globimetula dinklagei voucher Nickrent 3087 maturase K (matK) gene, partial cds; chloroplast.	Vidal-Russell,R. and Nickrent,D.L.	Am. J. Bot. 95 (8), 1015-1029 (2008)	Lorantheae	Emelianthinae	Globimetula	genomic DNA	Chloroplast	1458	matK
Globimetula dinklagei	EU544489	Nickrent 3087	Globimetula dinklagei voucher Nickrent 3087 tRNA-Leu (trnL) gene, partial sequence; trnL-trnF intergenic spacer, complete sequence; and tRNA-Phe (trnF) gene, partial sequence; chloroplast.	Vidal-Russell,R. and Nickrent,D.L.	Am. J. Bot. 95 (8), 1015-1029 (2008)	Lorantheae	Emelianthinae	Globimetula	genomic DNA	Chloroplast	597	trnL/LF
Helicanthes elastica	EU544328	Nickrent 4906	Helicanthes elastica voucher Nickrent 4906 small subunit ribosomal RNA gene, partial sequence.	Vidal-Russell,R. and Nickrent,D.L.	Am. J. Bot. 95 (8), 1015-1029 (2008)	Lorantheae	Amyeminae	Helicanthes	genomic DNA	Nucleolus	607	18S
Helicanthes elastica	EU544375	Nickrent 4906	Helicanthes elastica voucher Nickrent 4906 26S ribosomal RNA gene, partial sequence.	Vidal-Russell,R. and Nickrent,D.L.	Am. J. Bot. 95 (8), 1015-1029 (2008)	Lorantheae	Amyeminae	Helicanthes	genomic DNA	Nucleolus	295	25S
Helicanthes elastica	EU544432	Nickrent 4906	Helicanthes elastica voucher Nickrent 4906 maturase K (matK) gene, partial cds; chloroplast.	Vidal-Russell,R. and Nickrent,D.L.	Am. J. Bot. 95 (8), 1015-1029 (2008)	Lorantheae	Amyeminae	Helicanthes	genomic DNA	Chloroplast	1287	matK
Helixanthera coccinea	EU544373	Nickrent 4019	Helixanthera coccinea voucher Nickrent 4019 26S ribosomal RNA gene, partial sequence.	Vidal-Russell,R. and Nickrent,D.L.	Am. J. Bot. 95 (8), 1015-1029 (2008)	Lorantheae	Dendrophthoinae	Helixanthera	genomic DNA	Nucleolus	2100	25S
Helixanthera coccinea	EU544430	Nickrent 4019	Helixanthera coccinea voucher Nickrent 4019 maturase K (matK) gene, partial cds; chloroplast.	Vidal-Russell,R. and Nickrent,D.L.	Am. J. Bot. 95 (8), 1015-1029 (2008)	Lorantheae	Dendrophthoinae	Helixanthera	genomic DNA	Chloroplast	1311	matK
Helixanthera coccinea	EU544490	Nickrent 4019	Helixanthera coccinea voucher Nickrent 4019 tRNA-Leu (trnL) gene, partial sequence; trnL-trnF intergenic spacer, complete sequence; and tRNA-Phe (trnF) gene, partial sequence; chloroplast.	Vidal-Russell,R. and Nickrent,D.L.	Am. J. Bot. 95 (8), 1015-1029 (2008)	Lorantheae	Dendrophthoinae	Helixanthera	genomic DNA	Chloroplast	646	trnL/LF
Helixanthera cylindrica	EU544327	Nickrent 4037	Helixanthera cylindrica voucher Nickrent 4037 small subunit ribosomal RNA gene, partial sequence.	Vidal-Russell,R. and Nickrent,D.L.	Am. J. Bot. 95 (8), 1015-1029 (2008)	Lorantheae	Dendrophthoinae	Helixanthera	genomic DNA	Nucleolus	1724	18S
Helixanthera cylindrica	EU544374	Nickrent 4037	Helixanthera cylindrica voucher Nickrent 4037 26S ribosomal RNA gene, partial sequence.	Vidal-Russell,R. and Nickrent,D.L.	Am. J. Bot. 95 (8), 1015-1029 (2008)	Lorantheae	Dendrophthoinae	Helixanthera	genomic DNA	Nucleolus	1093	25S
Helixanthera cylindrica	EU544431	Nickrent 4037	Helixanthera cylindrica voucher Nickrent 4037 maturase K (matK) gene, partial cds; chloroplast.	Vidal-Russell,R. and Nickrent,D.L.	Am. J. Bot. 95 (8), 1015-1029 (2008)	Lorantheae	Dendrophthoinae	Helixanthera	genomic DNA	Chloroplast	1342	matK
Helixanthera kirkii	AF039077	UNKNOWN	Helixanthera kirkii 18S ribosomal RNA gene, partial sequence.	Nickrent,D.L. and Duff,R.J.	(in) Moreno,M.T., Cubero,J.I., Berner,D., Joel,D., Musselman,L.J.	Lorantheae	Dendrophthoinae	Helixanthera	genomic DNA	Nucleolus	1745	18S
Helixanthera parasitica	AY191145	UNKNOWN	Helixanthera parasitica tRNA-Leu (trnL) gene, partial sequence; chloroplast gene for chloroplast product.	Han,R.L., Hao,G. and Zhang,D.X.	Unpublished	Lorantheae	Dendrophthoinae	Helixanthera	genomic DNA	Chloroplast	303	trnL/LF
Helixanthera parasitica	DQ333823	Calvin and Wilson B02-01	Helixanthera parasitica internal transcribed spacer 1, partial sequence; 5.8S ribosomal RNA gene, complete sequence; and internal transcribed spacer 2, partial sequence.	Wilson,C.A. and Calvin,C.L.	Am. J. Bot. 93 (5), 787-796 (2006)	Lorantheae	Dendrophthoinae	Helixanthera	genomic DNA	Nucleolus	576	ITS1; 5.8S; ITS2
Helixanthera parasitica	DQ340572	Calvin and Wilson B02-01	Helixanthera parasitica tRNA-Leu (trnL) gene and trnL-trnF intergenic spacer, partial sequence; chloroplast.	Wilson,C.A. and Calvin,C.L.	Am. J. Bot. 93 (5), 787-796 (2006)	Lorantheae	Dendrophthoinae	Helixanthera	genomic DNA	Chloroplast	639	trnL/LF
Helixanthera parasitica	HQ317761	LS28	Helixanthera parasitica voucher LS28 ribulose-1,5-bisphosphate carboxylase/oxygenase large subunit (rbcL) gene, partial cds; chloroplast.	Li,Y.-H., Chen,S.-L., Yao,H. and Luo,K.	Unpublished	Lorantheae	Dendrophthoinae	Helixanthera	genomic DNA	Chloroplast	703	rbcL
Helixanthera parasitica	HQ317762	LS29	Helixanthera parasitica voucher LS29 ribulose-1,5-bisphosphate carboxylase/oxygenase large subunit (rbcL) gene, partial cds; chloroplast.	Li,Y.-H., Chen,S.-L., Yao,H. and Luo,K.	Unpublished	Lorantheae	Dendrophthoinae	Helixanthera	genomic DNA	Chloroplast	703	rbcL
Helixanthera parasitica	HQ317763	LS30	Helixanthera parasitica voucher LS30 ribulose-1,5-bisphosphate carboxylase/oxygenase large subunit (rbcL) gene, partial cds; chloroplast.	Li,Y.-H., Chen,S.-L., Yao,H. and Luo,K.	Unpublished	Lorantheae	Dendrophthoinae	Helixanthera	genomic DNA	Chloroplast	703	rbcL
Helixanthera parasitica	HQ317764	LS31	Helixanthera parasitica voucher LS31 ribulose-1,5-bisphosphate carboxylase/oxygenase large subunit (rbcL) gene, partial cds; chloroplast.	Li,Y.-H., Chen,S.-L., Yao,H. and Luo,K.	Unpublished	Lorantheae	Dendrophthoinae	Helixanthera	genomic DNA	Chloroplast	703	rbcL
Helixanthera parasitica	HQ317802	LS28	Helixanthera parasitica voucher LS28 PsbA (psbA) gene, partial cds; psbA-trnH intergenic spacer, complete sequence; and tRNA-His (trnH) gene, partial sequence; chloroplast.	Li,Y.-H., Chen,S.-L., Yao,H. and Luo,K.	Unpublished	Lorantheae	Dendrophthoinae	Helixanthera	genomic DNA	Chloroplast	352	trnH-psbA
Helixanthera parasitica	HQ317803	LS29	Helixanthera parasitica voucher LS29 PsbA (psbA) gene, partial cds; psbA-trnH intergenic spacer, complete sequence; and tRNA-His (trnH) gene, partial sequence; chloroplast.	Li,Y.-H., Chen,S.-L., Yao,H. and Luo,K.	Unpublished	Lorantheae	Dendrophthoinae	Helixanthera	genomic DNA	Chloroplast	352	trnH-psbA
Helixanthera parasitica	HQ317804	LS30	Helixanthera parasitica voucher LS30 PsbA (psbA) gene, partial cds; psbA-trnH intergenic spacer, complete sequence; and tRNA-His (trnH) gene, partial sequence; chloroplast.	Li,Y.-H., Chen,S.-L., Yao,H. and Luo,K.	Unpublished	Lorantheae	Dendrophthoinae	Helixanthera	genomic DNA	Chloroplast	348	trnH-psbA
Helixanthera parasitica	HQ317805	LS31	Helixanthera parasitica voucher LS31 PsbA (psbA) gene, partial cds; psbA-trnH intergenic spacer, complete sequence; and tRNA-His (trnH) gene, partial sequence; chloroplast.	Li,Y.-H., Chen,S.-L., Yao,H. and Luo,K.	Unpublished	Lorantheae	Dendrophthoinae	Helixanthera	genomic DNA	Chloroplast	352	trnH-psbA
Helixanthera parasitica	JN687573	A. Chveerach_P93.3	Helixanthera parasitica psbA-trnH intergenic spacer, partial sequence; chloroplast.	Kwanda,N., Noikotr,K., Sudmoon,R., Tanee,T. and Chaveerach,A.	J Nat Med (2012) In press	Lorantheae	Dendrophthoinae	Helixanthera	genomic DNA	Chloroplast	311	trnH-psbA
Helixanthera parasitica	JN687565	A. Chveerach_P93.3	Helixanthera parasitica ribulose-1,5-bisphosphate carboxylase/oxygenase large subunit (rbcL) gene, partial cds; chloroplast.	Kwanda,N., Noikotr,K., Sudmoon,R., Tanee,T. and Chaveerach,A.	J Nat Med (2012) In press	Lorantheae	Dendrophthoinae	Helixanthera	genomic DNA	Chloroplast	521	rbcL
Helixanthera pulchra	AY191135	UNKNOWN	Helixanthera pierrei tRNA-Leu (trnL) gene, partial sequence; chloroplast gene for chloroplast product.	Han,R.L., Hao,G. and Zhang,D.X.	Unpublished	Lorantheae	Dendrophthoinae	Helixanthera	genomic DNA	Chloroplast	328	trnL/LF
Helixanthera sampsonii	HQ317765	LS33	Helixanthera sampsonii voucher LS33 ribulose-1,5-bisphosphate carboxylase/oxygenase large subunit (rbcL) gene, partial cds; chloroplast.	Li,Y.-H., Chen,S.-L., Yao,H. and Luo,K.	Unpublished	Lorantheae	Dendrophthoinae	Helixanthera	genomic DNA	Chloroplast	703	rbcL
Helixanthera sampsonii	HQ317766	LS34	Helixanthera sampsonii voucher LS34 ribulose-1,5-bisphosphate carboxylase/oxygenase large subunit (rbcL) gene, partial cds; chloroplast.	Li,Y.-H., Chen,S.-L., Yao,H. and Luo,K.	Unpublished	Lorantheae	Dendrophthoinae	Helixanthera	genomic DNA	Chloroplast	703	rbcL
Helixanthera sampsonii	HQ317806	LS33	Helixanthera sampsonii voucher LS33 PsbA (psbA) gene, partial cds; psbA-trnH intergenic spacer, complete sequence; and tRNA-His (trnH) gene, partial sequence; chloroplast.	Li,Y.-H., Chen,S.-L., Yao,H. and Luo,K.	Unpublished	Lorantheae	Dendrophthoinae	Helixanthera	genomic DNA	Chloroplast	355	trnH-psbA
Helixanthera sampsonii	HQ317807	LS34	Helixanthera sampsonii voucher LS34 PsbA (psbA) gene, partial cds; psbA-trnH intergenic spacer, complete sequence; and tRNA-His (trnH) gene, partial sequence; chloroplast.	Li,Y.-H., Chen,S.-L., Yao,H. and Luo,K.	Unpublished	Lorantheae	Dendrophthoinae	Helixanthera	genomic DNA	Chloroplast	355	trnH-psbA
Ileostylus micranthus	DQ333841	Calvin and Wilson NZ00-02	Ileostylus micranthus internal transcribed spacer 1, partial sequence; 5.8S ribosomal RNA gene, complete sequence; and internal transcribed spacer 2, partial sequence.	Wilson,C.A. and Calvin,C.L.	Am. J. Bot. 93 (5), 787-796 (2006)	Lorantheae	Ileostylinae	Ileostylus	genomic DNA	Nucleolus	684	ITS1; 5.8S; ITS2
Ileostylus micranthus	DQ340592	Calvin and Wilson NZ00-02	Ileostylus micranthus tRNA-Leu (trnL) gene and trnL-trnF intergenic spacer, partial sequence; chloroplast.	Wilson,C.A. and Calvin,C.L.	Am. J. Bot. 93 (5), 787-796 (2006)	Lorantheae	Ileostylinae	Ileostylus	genomic DNA	Chloroplast	634	trnL/LF
Ileostylus micranthus	EU544329	Nickrent 2741	Ileostylus micranthus voucher Nickrent 2741 small subunit ribosomal RNA gene, partial sequence.	Vidal-Russell,R. and Nickrent,D.L.	Am. J. Bot. 95 (8), 1015-1029 (2008)	Lorantheae	Ileostylinae	Ileostylus	genomic DNA	Nucleolus	1806	18S
Ileostylus micranthus	EU544376	Nickrent 2741	Ileostylus micranthus voucher Nickrent 2741 26S ribosomal RNA gene, partial sequence.	Vidal-Russell,R. and Nickrent,D.L.	Am. J. Bot. 95 (8), 1015-1029 (2008)	Lorantheae	Ileostylinae	Ileostylus	genomic DNA	Nucleolus	1738	25S
Ileostylus micranthus	EU544433	Nickrent 2741	Ileostylus micranthus voucher Nickrent 2741 maturase K (matK) gene, partial cds; chloroplast.	Vidal-Russell,R. and Nickrent,D.L.	Am. J. Bot. 95 (8), 1015-1029 (2008)	Lorantheae	Ileostylinae	Ileostylus	genomic DNA	Chloroplast	1382	matK
Ileostylus micranthus	EU544471	Nickrent 2741	Ileostylus micranthus voucher Nickrent 2741 ribulose-1,5-bisphosphate carboxylase/oxygenase large subunit (rbcL) gene, partial cds; chloroplast.	Vidal-Russell,R. and Nickrent,D.L.	Unpublished	Lorantheae	Ileostylinae	Ileostylus	genomic DNA	Chloroplast	828	rbcL
Ileostylus micranthus	EU544491	Nickrent 2741	Ileostylus micranthus voucher Nickrent 2741 tRNA-Leu (trnL) gene, partial sequence; trnL-trnF intergenic spacer, complete sequence; and tRNA-Phe (trnF) gene, partial sequence; chloroplast.	Vidal-Russell,R. and Nickrent,D.L.	Am. J. Bot. 95 (8), 1015-1029 (2008)	Lorantheae	Ileostylinae	Ileostylus	genomic DNA	Chloroplast	575	trnL/LF
Phthirusa inornus	DQ333858	Calvin and Wilson MX03-04	Ixocactus inornus internal transcribed spacer 1, partial sequence; 5.8S ribosomal RNA gene, complete sequence; and internal transcribed spacer 2, partial sequence.	Wilson,C.A. and Calvin,C.L.	Am. J. Bot. 93 (5), 787-796 (2006)	Psittacantheae	Psittacanthinae	Phthirusa	genomic DNA	Nucleolus	686	ITS1; 5.8S; ITS2
Phthirusa inornus	DQ340609	Calvin and Wilson MX03-04	Ixocactus inornus tRNA-Leu (trnL) gene and trnL-trnF intergenic spacer, partial sequence; chloroplast.	Wilson,C.A. and Calvin,C.L.	Am. J. Bot. 93 (5), 787-796 (2006)	Psittacantheae	Psittacanthinae	Phthirusa	genomic DNA	Chloroplast	688	trnL/LF
Phthirusa sp.	EU544377	Nickrent 4332	Ixocactus sp. Nickrent 4332 26S ribosomal RNA gene, partial sequence.	Vidal-Russell,R. and Nickrent,D.L.	Am. J. Bot. 95 (8), 1015-1029 (2008)	Psittacantheae	Psittacanthinae	Phthirusa	genomic DNA	Nucleolus	1648	25S
Lepeostegeres lancifolius	EU544379	Nickrent 4041	Lepeostegeres lancifolius voucher Nickrent 4041 26S ribosomal RNA gene, partial sequence.	Vidal-Russell,R. and Nickrent,D.L.	Am. J. Bot. 95 (8), 1015-1029 (2008)	Elytrantheae	[n/a]	Lepeostegeres	genomic DNA	Nucleolus	1991	25S
Lepeostegeres lancifolius	EU544435	Nickrent 4041	Lepeostegeres lancifolius voucher Nickrent 4041 maturase K (matK) gene, partial cds; chloroplast.	Vidal-Russell,R. and Nickrent,D.L.	Am. J. Bot. 95 (8), 1015-1029 (2008)	Elytrantheae	[n/a]	Lepeostegeres	genomic DNA	Chloroplast	1153	matK
Lepidaria cf. forbesii	EU544330	Nickrent 4044	Lepidaria cf. forbesii Nickrent 4044 small subunit ribosomal RNA gene, partial sequence.	Vidal-Russell,R. and Nickrent,D.L.	Am. J. Bot. 95 (8), 1015-1029 (2008)	Elytrantheae	[n/a]	Lepidaria	genomic DNA	Nucleolus	1546	18S
Lepidaria cf. forbesii	EU544378	Nickrent 4044	Lepidaria cf. forbesii Nickrent 4044 26S ribosomal RNA gene, partial sequence.	Vidal-Russell,R. and Nickrent,D.L.	Am. J. Bot. 95 (8), 1015-1029 (2008)	Elytrantheae	[n/a]	Lepidaria	genomic DNA	Nucleolus	2056	25S
Lepidaria cf. forbesii	EU544434	Nickrent 4044	Lepidaria cf. forbesii Nickrent 4044 maturase K (matK) gene, partial cds; chloroplast.	Vidal-Russell,R. and Nickrent,D.L.	Am. J. Bot. 95 (8), 1015-1029 (2008)	Elytrantheae	[n/a]	Lepidaria	genomic DNA	Chloroplast	1407	matK
Lepidaria cf. forbesii	EU544492	Nickrent 4044	Lepidaria cf. forbesii Nickrent 4044 tRNA-Leu (trnL) gene, partial sequence; trnL-trnF intergenic spacer, complete sequence; and tRNA-Phe (trnF) gene, partial sequence; chloroplast.	Vidal-Russell,R. and Nickrent,D.L.	Am. J. Bot. 95 (8), 1015-1029 (2008)	Elytrantheae	[n/a]	Lepidaria	genomic DNA	Chloroplast	618	trnL/LF
Lepidaria oviceps	DQ333851	Calvin and Wilson B02-19	Lepidaria oviceps internal transcribed spacer 1, partial sequence; 5.8S ribosomal RNA gene, complete sequence; and internal transcribed spacer 2, partial sequence.	Wilson,C.A. and Calvin,C.L.	Am. J. Bot. 93 (5), 787-796 (2006)	Elytrantheae	[n/a]	Lepidaria	genomic DNA	Nucleolus	775	ITS1; 5.8S; ITS2
Lepidaria oviceps	DQ340602	Calvin and Wilson B02-19	Lepidaria oviceps tRNA-Leu (trnL) gene and trnL-trnF intergenic spacer, partial sequence; chloroplast.	Wilson,C.A. and Calvin,C.L.	Am. J. Bot. 93 (5), 787-796 (2006)	Elytrantheae	[n/a]	Lepidaria	genomic DNA	Chloroplast	593	trnL/LF
Ligaria cuneifolia	L24152	UNKNOWN	Ligaria cuneifolia (Ruiz and Pavon) Tiegh. 18S ribosomal RNA gene, partial sequence.	Nickrent,D.L. and Duff,R.J.	(in) Moreno,M.T., Cubero,J.I., Berner,D., Joel,D., Musselman,L.J.	Psittacantheae	Ligarinae	Ligaria	genomic DNA	Nucleolus	1754	18S
Ligaria cuneifolia	DQ333853	Calvin and Wilson CL03-01	Ligaria cuneifolia internal transcribed spacer 1, partial sequence; 5.8S ribosomal RNA gene, complete sequence; and internal transcribed spacer 2, partial sequence.	Wilson,C.A. and Calvin,C.L.	Am. J. Bot. 93 (5), 787-796 (2006)	Psittacantheae	Ligarinae	Ligaria	genomic DNA	Nucleolus	658	ITS1; 5.8S; ITS2
Ligaria cuneifolia	DQ340604	Calvin and Wilson CL03-01	Ligaria cuneifolia tRNA-Leu (trnL) gene and trnL-trnF intergenic spacer, partial sequence; chloroplast.	Wilson,C.A. and Calvin,C.L.	Am. J. Bot. 93 (5), 787-796 (2006)	Psittacantheae	Ligarinae	Ligaria	genomic DNA	Chloroplast	603	trnL/LF
Ligaria cuneifolia	DQ442963	G. Amico 76 (BRCU)	Ligaria cuneifolia atpB gene, partial sequence; atpB-rbcL intergenic spacer, complete sequence; and ribulose 1,5-bisphosphate carboxylase/oxygenase large subunit (rbcL) gene, partial cds; chloroplast.	Amico,G.C., Vidal-Russell,R. and Nickrent,D.L.	Am. J. Bot. 94 (4), 558-567 (2007)	Psittacantheae	Ligarinae	Ligaria	genomic DNA	Chloroplast	500	atpB-rbcL
Ligaria cuneifolia	DQ442940	G. Amico 76 (BCRU)	Ligaria cuneifolia tRNA-Leu (trnL) gene and trnL-trnF intergenic spacer, partial sequence; chloroplast.	Amico,G.C., Vidal-Russell,R. and Nickrent,D.L.	Am. J. Bot. 94 (4), 558-567 (2007)	Psittacantheae	Ligarinae	Ligaria	genomic DNA	Chloroplast	571	trnL/LF
Ligaria cuneifolia	DQ442986	G. Amico 76 (BRCU)	Ligaria cuneifolia internal transcribed spacer 1, partial sequence; 5.8S ribosomal RNA gene and internal transcribed spacer 2, complete sequence; and 26S ribosomal RNA gene, partial sequence.	Amico,G.C., Vidal-Russell,R. and Nickrent,D.L.	Am. J. Bot. 94 (4), 558-567 (2007)	Psittacantheae	Ligarinae	Ligaria	genomic DNA	Nucleolus	634	ITS1; 5.8S; ITS2
Ligaria cuneifolia	EF464477	Nickrent 4567	Ligaria cuneifolia 26S ribosomal RNA gene, partial sequence.	Vidal-Russell,R. and Nickrent,D.L.	Mol. Phylogenet. Evol. 47 (2), 523-537 (2008)	Psittacantheae	Ligarinae	Ligaria	genomic DNA	Nucleolus	888	25S
Ligaria cuneifolia	EF464528	Nickrent 4567	Ligaria cuneifolia ribulose-1,5-bisphosphate carboxylase/oxygenase large subunit (rbcL) gene, partial cds; chloroplast.	Vidal-Russell,R. and Nickrent,D.L.	Mol. Phylogenet. Evol. 47 (2), 523-537 (2008)	Psittacantheae	Ligarinae	Ligaria	genomic DNA	Chloroplast	823	rbcL
Ligaria cuneifolia	EF464510	Nickrent 4567	Ligaria cuneifolia maturase K (matK) gene, partial cds; chloroplast.	Vidal-Russell,R. and Nickrent,D.L.	Mol. Phylogenet. Evol. 47 (2), 523-537 (2008)	Psittacantheae	Ligarinae	Ligaria	genomic DNA	Chloroplast	1151	matK
Loranthaceae sp.	JQ594620	RE-5090	Loranthaceae sp. MHPAA216-08 voucher RE-5090 ribulose-1,5-bisphosphate carboxylase/oxygenase large subunit (rbcL) gene, partial cds; chloroplast.	International Barcode of Life (iBOL)	Unpublished	unclassified Loranthaceae	[n/a]	[n/a]	genomic DNA	Chloroplast	561	rbcL
Loranthus delavayi	AY191144	UNKNOWN	Loranthus delavayi isolate 2 tRNA-Leu (trnL) gene, partial sequence; chloroplast gene for chloroplast product.	Han,R.L., Hao,G. and Zhang,D.X.	Unpublished	Lorantheae	Loranthinae	Loranthus	genomic DNA	Chloroplast	291	trnL/LF
Loranthus delavayi	AY191153	UNKNOWN	Loranthus delavayi isolate 1 tRNA-Leu (trnL) gene, partial sequence; chloroplast gene for chloroplast product.	Han,R.L., Hao,G. and Zhang,D.X.	Unpublished	Lorantheae	Loranthinae	Loranthus	genomic DNA	Chloroplast	354	trnL/LF
Loranthus delavayi	DQ453773	CCWU 0033	Loranthus delavayi MADS-box transcription factor (TM6) mRNA, partial cds.	Kramer,E.M., Su,H.J., Wu,C.C. and Hu,J.M.	BMC Evol. Biol. 6, 30 (2006)	Lorantheae	Loranthinae	Loranthus	mRNA	Nucleolus	830	[mRNA]
Loranthus delavayi	HQ317767	LS39	Loranthus delavayi voucher LS39 ribulose-1,5-bisphosphate carboxylase/oxygenase large subunit (rbcL) gene, partial cds; chloroplast.	Li,Y.-H., Chen,S.-L., Yao,H. and Luo,K.	Unpublished	Lorantheae	Loranthinae	Loranthus	genomic DNA	Chloroplast	703	rbcL
Loranthus delavayi	HQ317808	LS39	Loranthus delavayi voucher LS39 PsbA (psbA) gene, partial cds; psbA-trnH intergenic spacer, complete sequence; and tRNA-His (trnH) gene, partial sequence; chloroplast.	Li,Y.-H., Chen,S.-L., Yao,H. and Luo,K.	Unpublished	Lorantheae	Loranthinae	Loranthus	genomic DNA	Chloroplast	315	trnH-psbA
Loranthus delavayi	JQ613220	UNKNOWN	Loranthus delavayi 18S ribosomal RNA gene, partial sequence.	Su,H.-J. and Hu,J.-M.	Ann. Bot. 110 (6), 1137-1147 (2012)	Lorantheae	Loranthinae	Loranthus	genomic DNA	Nucleolus	1717	18S
Loranthus delavayi	JQ613248	UNKNOWN	Loranthus delavayi maturase (matR) gene, partial cds; mitochondrial.	Su,H.-J. and Hu,J.-M.	Ann. Bot. 110 (6), 1137-1147 (2012)	Lorantheae	Loranthinae	Loranthus	genomic DNA	Mitochondrion	1683	matR
Loranthus delavayi	JQ613264	UNKNOWN	Loranthus delavayi PISTILLATA-like protein (PI) mRNA, partial cds.	Su,H.-J. and Hu,J.-M.	Ann. Bot. 110 (6), 1137-1147 (2012)	Lorantheae	Loranthinae	Loranthus	mRNA	Nucleolus	630	[mRNA]
Loranthus europaeus	L24153	UNKNOWN	Loranthus europaeus Jacq. 18S ribosomal RNA gene, partial sequence.	Nickrent,D.L. and Duff,R.J.	(in) Moreno,M.T., Cubero,J.I., Berner,D., Joel,D., Musselman,L.J.	Lorantheae	Loranthinae	Loranthus	genomic DNA	Nucleolus	1740	18S
Loranthus europaeus	EU544380	Nickrent 2849	Loranthus europaeus voucher Nickrent 2849 26S ribosomal RNA gene, partial sequence.	Vidal-Russell,R. and Nickrent,D.L.	Am. J. Bot. 95 (8), 1015-1029 (2008)	Lorantheae	Loranthinae	Loranthus	genomic DNA	Nucleolus	2083	25S
Loranthus europaeus	EU544436	Nickrent 5082	Loranthus europaeus voucher Nickrent 5082 maturase K (matK) gene, partial cds; chloroplast.	Vidal-Russell,R. and Nickrent,D.L.	Am. J. Bot. 95 (8), 1015-1029 (2008)	Lorantheae	Loranthinae	Loranthus	genomic DNA	Chloroplast	675	matK
Loranthus europaeus	EU544493	Nickrent 2849	Loranthus europaeus voucher Nickrent 2849 tRNA-Leu (trnL) gene, partial sequence; trnL-trnF intergenic spacer, complete sequence; and tRNA-Phe (trnF) gene, partial sequence; chloroplast.	Vidal-Russell,R. and Nickrent,D.L.	Am. J. Bot. 95 (8), 1015-1029 (2008)	Lorantheae	Loranthinae	Loranthus	genomic DNA	Chloroplast	542	trnL/LF
Loranthus europaeus	HQ917110	GUH-3993	Loranthus europaeus voucher GUH-3993 18S ribosomal RNA gene, partial sequence; and internal transcribed spacer 1, 5.8S ribosomal RNA gene, and internal transcribed spacer 2, complete sequence.	Zanjanchi,P., Sajedi,R.H. and Saeidi Mehrvarz,S.	Submitted (15-JAN-2011) Biology, Faculty of Science, University of	Lorantheae	Loranthinae	Loranthus	genomic DNA	Nucleolus	647	ITS1; 5.8S; ITS2
Loranthus europaeus	HQ917114	GUH-3997	Loranthus europaeus voucher GUH-3997 tRNA-Leu (trnL) gene, partial sequence; trnL-trnF intergenic spacer, complete sequence; and tRNA-Phe (trnF) gene, partial sequence; chloroplast.	Zanjanchi,P., Sajedi,R.H. and Saeidi Mehrvarz,S.	Submitted (16-JAN-2011) Biology, Faculty of Science, University of	Lorantheae	Loranthinae	Loranthus	genomic DNA	Chloroplast	500	trnL/LF
Loranthus europaeus	JQ933393	Chase, 14152, (K)	Loranthus europaeus voucher Chase, 14152, (K) ribulose-1,5-bisphosphate carboxylase/oxygenase large subunit (rbcL) gene, partial cds; plastid.	Saslis-Lagoudakis,C.H., Savolainen,V., Williamson,E.M., Forest,F.,	Proc. Natl. Acad. Sci. U.S.A. 109 (39), 15835-15840 (2012)	Lorantheae	Loranthinae	Loranthus	genomic DNA	Chloroplast	1383	rbcL
Loranthus grewingkii	HQ917111	GUH-3994	Loranthus grewingkii voucher GUH-3994 18S ribosomal RNA gene, partial sequence; and internal transcribed spacer 1, 5.8S ribosomal RNA gene, and internal transcribed spacer 2, complete sequence.	Zanjanchi,P., Sajedi,R.H. and Saeidi Mehrvarz,S.	Submitted (15-JAN-2011) Biology, Faculty of Science, University of	Lorantheae	Loranthinae	Loranthus	genomic DNA	Nucleolus	643	ITS1; 5.8S; ITS2
Loranthus grewingkii	HQ917115	GUH-3998	Loranthus grewingkii voucher GUH-3998 tRNA-Leu (trnL) gene, partial sequence; trnL-trnF intergenic spacer, complete sequence; and tRNA-Phe (trnF) gene, partial sequence; chloroplast.	Zanjanchi,P., Sajedi,R.H. and Saeidi Mehrvarz,S.	Submitted (16-JAN-2011) Biology, Faculty of Science, University of	Lorantheae	Loranthinae	Loranthus	genomic DNA	Chloroplast	490	trnL/LF
Loranthus kaoi	JQ613221	UNKNOWN	Loranthus kaoi 18S ribosomal RNA gene, partial sequence.	Su,H.-J. and Hu,J.-M.	Ann. Bot. 110 (6), 1137-1147 (2012)	Lorantheae	Loranthinae	Loranthus	genomic DNA	Nucleolus	1715	18S
Loranthus kaoi	JQ613241	UNKNOWN	Loranthus kaoi TM6-like protein (TM6) mRNA, partial cds.	Su,H.-J. and Hu,J.-M.	Ann. Bot. 110 (6), 1137-1147 (2012)	Lorantheae	Loranthinae	Loranthus	mRNA	Nucleolus	609	[mRNA]
Loranthus kaoi	JQ613249	UNKNOWN	Loranthus kaoi maturase (matR) gene, partial cds; mitochondrial.	Su,H.-J. and Hu,J.-M.	Ann. Bot. 110 (6), 1137-1147 (2012)	Lorantheae	Loranthinae	Loranthus	genomic DNA	Mitochondrion	1494	matR
Loranthus kaoi	JQ613263	UNKNOWN	Loranthus kaoi PISTILLATA-like protein (PI) mRNA, partial cds.	Su,H.-J. and Hu,J.-M.	Ann. Bot. 110 (6), 1137-1147 (2012)	Lorantheae	Loranthinae	Loranthus	mRNA	Nucleolus	630	[mRNA]
Loranthus kaoi	JQ613272	UNKNOWN	Loranthus kaoi RNA polymerase II second largest subunit (RPB2) mRNA, partial cds.	Su,H.-J. and Hu,J.-M.	Ann. Bot. 110 (6), 1137-1147 (2012)	Lorantheae	Loranthinae	Loranthus	mRNA	Nucleolus	1440	[mRNA]
Loranthus odoratus	EU544331	Nickrent 4977	Loranthus odoratus voucher Nickrent 4977 small subunit ribosomal RNA gene, partial sequence.	Vidal-Russell,R. and Nickrent,D.L.	Am. J. Bot. 95 (8), 1015-1029 (2008)	Lorantheae	Loranthinae	Loranthus	genomic DNA	Nucleolus	1607	18S
Loranthus odoratus	EU544381	Nickrent 4977	Loranthus odoratus voucher Nickrent 4977 26S ribosomal RNA gene, partial sequence.	Vidal-Russell,R. and Nickrent,D.L.	Am. J. Bot. 95 (8), 1015-1029 (2008)	Lorantheae	Loranthinae	Loranthus	genomic DNA	Nucleolus	1753	25S
Loranthus odoratus	EU544494	Nickrent 4977	Loranthus odoratus voucher Nickrent 4977 tRNA-Leu (trnL) gene, partial sequence; trnL-trnF intergenic spacer, complete sequence; and tRNA-Phe (trnF) gene, partial sequence; chloroplast.	Vidal-Russell,R. and Nickrent,D.L.	Am. J. Bot. 95 (8), 1015-1029 (2008)	Lorantheae	Loranthinae	Loranthus	genomic DNA	Chloroplast	569	trnL/LF
Loxanthera speciosa	EU544332	Nickrent 4026	Loxanthera speciosa voucher Nickrent 4026 small subunit ribosomal RNA gene, partial sequence.	Vidal-Russell,R. and Nickrent,D.L.	Am. J. Bot. 95 (8), 1015-1029 (2008)	Elytrantheae	[n/a]	Loxanthera	genomic DNA	Nucleolus	1779	18S
Loxanthera speciosa	EU544382	Nickrent4026	Loxanthera speciosa voucher Nickrent4026 26S ribosomal RNA gene, partial sequence.	Vidal-Russell,R. and Nickrent,D.L.	Am. J. Bot. 95 (8), 1015-1029 (2008)	Elytrantheae	[n/a]	Loxanthera	genomic DNA	Nucleolus	2051	25S
Loxanthera speciosa	EU544437	Nickrent 4026	Loxanthera speciosa voucher Nickrent 4026 maturase K (matK) gene, partial cds; chloroplast.	Vidal-Russell,R. and Nickrent,D.L.	Am. J. Bot. 95 (8), 1015-1029 (2008)	Elytrantheae	[n/a]	Loxanthera	genomic DNA	Chloroplast	1405	matK
Loxanthera speciosa	EU544495	Nickrent 4026	Loxanthera speciosa voucher Nickrent 4026 tRNA-Leu (trnL) gene, partial sequence; trnL-trnF intergenic spacer, complete sequence; and tRNA-Phe (trnF) gene, partial sequence; chloroplast.	Vidal-Russell,R. and Nickrent,D.L.	Am. J. Bot. 95 (8), 1015-1029 (2008)	Elytrantheae	[n/a]	Loxanthera	genomic DNA	Chloroplast	590	trnL/LF
Lysiana exocarpi	L24154	UNKNOWN	Lysiana exocarpi (Behr.) Tiegh. 18S ribosomal RNA gene, partial sequence.	Nickrent,D.L. and Duff,R.J.	(in) Moreno,M.T., Cubero,J.I., Berner,D., Joel,D., Musselman,L.J.	Elytrantheae	[n/a]	Lysiana	genomic DNA	Nucleolus	1767	18S
Lysiana filifolia	EU544333	Nickrent 4449	Lysiana filifolia voucher Nickrent 4449 small subunit ribosomal RNA gene, partial sequence.	Vidal-Russell,R. and Nickrent,D.L.	Am. J. Bot. 95 (8), 1015-1029 (2008)	Elytrantheae	[n/a]	Lysiana	genomic DNA	Nucleolus	1731	18S
Lysiana filifolia	EU544383	Nickrent 4449	Lysiana filifolia voucher Nickrent 4449 26S ribosomal RNA gene, partial sequence.	Vidal-Russell,R. and Nickrent,D.L.	Am. J. Bot. 95 (8), 1015-1029 (2008)	Elytrantheae	[n/a]	Lysiana	genomic DNA	Nucleolus	2010	25S
Lysiana filifolia	EU544438	Nickrent 4449	Lysiana filifolia voucher Nickrent 4449 maturase K (matK) gene, partial cds; chloroplast.	Vidal-Russell,R. and Nickrent,D.L.	Am. J. Bot. 95 (8), 1015-1029 (2008)	Elytrantheae	[n/a]	Lysiana	genomic DNA	Chloroplast	1396	matK
Lysiana filifolia	EU544496	Nickrent 4449	Lysiana filifolia voucher Nickrent 4449 tRNA-Leu (trnL) gene, partial sequence; trnL-trnF intergenic spacer, complete sequence; and tRNA-Phe (trnF) gene, partial sequence; chloroplast.	Vidal-Russell,R. and Nickrent,D.L.	Am. J. Bot. 95 (8), 1015-1029 (2008)	Elytrantheae	[n/a]	Lysiana	genomic DNA	Chloroplast	594	trnL/LF
Lysiana maritima	DQ333848	Calvin and Wilson AU98-19	Lysiana maritima internal transcribed spacer 1, partial sequence; 5.8S ribosomal RNA gene, complete sequence; and internal transcribed spacer 2, partial sequence.	Wilson,C.A. and Calvin,C.L.	Am. J. Bot. 93 (5), 787-796 (2006)	Elytrantheae	[n/a]	Lysiana	genomic DNA	Nucleolus	684	ITS1; 5.8S; ITS2
Lysiana maritima	DQ340599	Calvin and Wilson AU98-19	Lysiana maritima tRNA-Leu (trnL) gene and trnL-trnF intergenic spacer, partial sequence; chloroplast.	Wilson,C.A. and Calvin,C.L.	Am. J. Bot. 93 (5), 787-796 (2006)	Elytrantheae	[n/a]	Lysiana	genomic DNA	Chloroplast	631	trnL/LF
Macrosolen brandisianus	JN687574	A. Chveerach_P16.2	Macrosolen brandisianus psbA-trnH intergenic spacer, partial sequence; chloroplast.	Kwanda,N., Noikotr,K., Sudmoon,R., Tanee,T. and Chaveerach,A.	J Nat Med (2012) In press	Elytrantheae	[n/a]	Macrosolen	genomic DNA	Chloroplast	303	trnH-psbA
Macrosolen brandisianus	JN687566	A. Chveerach_P16.2	Macrosolen brandisianus ribulose-1,5-bisphosphate carboxylase/oxygenase large subunit (rbcL) gene, partial cds; chloroplast.	Kwanda,N., Noikotr,K., Sudmoon,R., Tanee,T. and Chaveerach,A.	J Nat Med (2012) In press	Elytrantheae	[n/a]	Macrosolen	genomic DNA	Chloroplast	522	rbcL
Macrosolen cochinchinensis	AY191136	UNKNOWN	Macrosolen cochinchinensis tRNA-Leu (trnL) gene, partial sequence; chloroplast gene for chloroplast product.	Han,R.L., Hao,G. and Zhang,D.X.	Unpublished	Elytrantheae	[n/a]	Macrosolen	genomic DNA	Chloroplast	311	trnL/LF
Macrosolen cochinchinensis	EU544334	Nickrent 4038	Macrosolen cochinchinensis voucher Nickrent 4038 small subunit ribosomal RNA gene, partial sequence.	Vidal-Russell,R. and Nickrent,D.L.	Am. J. Bot. 95 (8), 1015-1029 (2008)	Elytrantheae	[n/a]	Macrosolen	genomic DNA	Nucleolus	1781	18S
Macrosolen cochinchinensis	EU544384	Nickrent 4038	Macrosolen cochinchinensis voucher Nickrent 4038 26S ribosomal RNA gene, partial sequence.	Vidal-Russell,R. and Nickrent,D.L.	Am. J. Bot. 95 (8), 1015-1029 (2008)	Elytrantheae	[n/a]	Macrosolen	genomic DNA	Nucleolus	2139	25S
Macrosolen cochinchinensis	EU544439	Nickrent 4038	Macrosolen cochinchinensis voucher Nickrent 4038 maturase K (matK) gene, complete cds; chloroplast.	Vidal-Russell,R. and Nickrent,D.L.	Am. J. Bot. 95 (8), 1015-1029 (2008)	Elytrantheae	[n/a]	Macrosolen	genomic DNA	Chloroplast	1536	matK
Macrosolen cochinchinensis	EU544497	Nickrent 4038	Macrosolen cochinchinensis voucher Nickrent 4038 tRNA-Leu (trnL) gene, partial sequence; trnL-trnF intergenic spacer, complete sequence; and tRNA-Phe (trnF) gene, partial sequence; chloroplast.	Vidal-Russell,R. and Nickrent,D.L.	Am. J. Bot. 95 (8), 1015-1029 (2008)	Elytrantheae	[n/a]	Macrosolen	genomic DNA	Chloroplast	531	trnL/LF
Macrosolen cochinchinensis	HQ317768	LS05	Macrosolen cochinchinensis voucher LS05 ribulose-1,5-bisphosphate carboxylase/oxygenase large subunit (rbcL) gene, partial cds; chloroplast.	Li,Y.-H., Chen,S.-L., Yao,H. and Luo,K.	Unpublished	Elytrantheae	[n/a]	Macrosolen	genomic DNA	Chloroplast	703	rbcL
Macrosolen cochinchinensis	HQ317769	LS35	Macrosolen cochinchinensis voucher LS35 ribulose-1,5-bisphosphate carboxylase/oxygenase large subunit (rbcL) gene, partial cds; chloroplast.	Li,Y.-H., Chen,S.-L., Yao,H. and Luo,K.	Unpublished	Elytrantheae	[n/a]	Macrosolen	genomic DNA	Chloroplast	703	rbcL
Macrosolen cochinchinensis	HQ317770	LS36	Macrosolen cochinchinensis voucher LS36 ribulose-1,5-bisphosphate carboxylase/oxygenase large subunit (rbcL) gene, partial cds; chloroplast.	Li,Y.-H., Chen,S.-L., Yao,H. and Luo,K.	Unpublished	Elytrantheae	[n/a]	Macrosolen	genomic DNA	Chloroplast	703	rbcL
Macrosolen cochinchinensis	HQ317809	LS05	Macrosolen cochinchinensis voucher LS05 PsbA (psbA) gene, partial cds; psbA-trnH intergenic spacer, complete sequence; and tRNA-His (trnH) gene, partial sequence; chloroplast.	Li,Y.-H., Chen,S.-L., Yao,H. and Luo,K.	Unpublished	Elytrantheae	[n/a]	Macrosolen	genomic DNA	Chloroplast	331	trnH-psbA
Macrosolen cochinchinensis	HQ317810	LS35	Macrosolen cochinchinensis voucher LS35 PsbA (psbA) gene, partial cds; psbA-trnH intergenic spacer, complete sequence; and tRNA-His (trnH) gene, partial sequence; chloroplast.	Li,Y.-H., Chen,S.-L., Yao,H. and Luo,K.	Unpublished	Elytrantheae	[n/a]	Macrosolen	genomic DNA	Chloroplast	331	trnH-psbA
Macrosolen cochinchinensis	HQ317811	LS36	Macrosolen cochinchinensis voucher LS36 PsbA (psbA) gene, partial cds; psbA-trnH intergenic spacer, complete sequence; and tRNA-His (trnH) gene, partial sequence; chloroplast.	Li,Y.-H., Chen,S.-L., Yao,H. and Luo,K.	Unpublished	Elytrantheae	[n/a]	Macrosolen	genomic DNA	Chloroplast	331	trnH-psbA
Macrosolen cochinchinensis	JN687575	A. Chveerach_P31	Macrosolen cochinchinensis psbA-trnH intergenic spacer, partial sequence; chloroplast.	Kwanda,N., Noikotr,K., Sudmoon,R., Tanee,T. and Chaveerach,A.	J Nat Med (2012) In press	Elytrantheae	[n/a]	Macrosolen	genomic DNA	Chloroplast	277	trnH-psbA
Macrosolen cochinchinensis	JN687567	A. Chveerach_P31	Macrosolen cochinchinensis ribulose-1,5-bisphosphate carboxylase/oxygenase large subunit (rbcL) gene, partial cds; chloroplast.	Kwanda,N., Noikotr,K., Sudmoon,R., Tanee,T. and Chaveerach,A.	J Nat Med (2012) In press	Elytrantheae	[n/a]	Macrosolen	genomic DNA	Chloroplast	522	rbcL
Macrosolen cochinchinensis	JQ933395	I.W.J. Sinclair & D.G. Long, 5781, (E)	Macrosolen cochinchinensis voucher I.W.J. Sinclair & D.G. Long, 5781, (E) ribulose-1,5-bisphosphate carboxylase/oxygenase large subunit (rbcL) gene, partial cds; plastid.	Saslis-Lagoudakis,C.H., Savolainen,V., Williamson,E.M., Forest,F.,	Proc. Natl. Acad. Sci. U.S.A. 109 (39), 15835-15840 (2012)	Elytrantheae	[n/a]	Macrosolen	genomic DNA	Chloroplast	683	rbcL
Macrosolen melintangensis	DQ333842	Calvin and Wilson B02-17	Macrosolen melintangensis internal transcribed spacer 1, partial sequence; 5.8S ribosomal RNA gene, complete sequence; and internal transcribed spacer 2, partial sequence.	Wilson,C.A. and Calvin,C.L.	Am. J. Bot. 93 (5), 787-796 (2006)	Elytrantheae	[n/a]	Macrosolen	genomic DNA	Nucleolus	782	ITS1; 5.8S; ITS2
Macrosolen melintangensis	DQ340593	Calvin and Wilson B02-17	Macrosolen melintangensis tRNA-Leu (trnL) gene and trnL-trnF intergenic spacer, partial sequence; chloroplast.	Wilson,C.A. and Calvin,C.L.	Am. J. Bot. 93 (5), 787-796 (2006)	Elytrantheae	[n/a]	Macrosolen	genomic DNA	Chloroplast	681	trnL/LF
Macrosolen tricolor	HQ317771	LS37	Macrosolen tricolor voucher LS37 ribulose-1,5-bisphosphate carboxylase/oxygenase large subunit (rbcL) gene, partial cds; chloroplast.	Li,Y.-H., Chen,S.-L., Yao,H. and Luo,K.	Unpublished	Elytrantheae	[n/a]	Macrosolen	genomic DNA	Chloroplast	703	rbcL
Macrosolen tricolor	HQ317772	LS38	Macrosolen tricolor voucher LS38 ribulose-1,5-bisphosphate carboxylase/oxygenase large subunit (rbcL) gene, partial cds; chloroplast.	Li,Y.-H., Chen,S.-L., Yao,H. and Luo,K.	Unpublished	Elytrantheae	[n/a]	Macrosolen	genomic DNA	Chloroplast	703	rbcL
Macrosolen tricolor	HQ317812	LS37	Macrosolen tricolor voucher LS37 PsbA (psbA) gene, partial cds; psbA-trnH intergenic spacer, complete sequence; and tRNA-His (trnH) gene, partial sequence; chloroplast.	Li,Y.-H., Chen,S.-L., Yao,H. and Luo,K.	Unpublished	Elytrantheae	[n/a]	Macrosolen	genomic DNA	Chloroplast	356	trnH-psbA
Macrosolen tricolor	HQ317813	LS38	Macrosolen tricolor voucher LS38 PsbA (psbA) gene, partial cds; psbA-trnH intergenic spacer, complete sequence; and tRNA-His (trnH) gene, partial sequence; chloroplast.	Li,Y.-H., Chen,S.-L., Yao,H. and Luo,K.	Unpublished	Elytrantheae	[n/a]	Macrosolen	genomic DNA	Chloroplast	356	trnH-psbA
Moquiniella rubra	AF039078	UNKNOWN	Moquiniella rubra 18S ribosomal RNA gene, partial sequence.	Nickrent,D.L. and Duff,R.J.	(in) Moreno,M.T., Cubero,J.I., Berner,D., Joel,D., Musselman,L.J.	Lorantheae	Emelianthinae	Moquiniella	genomic DNA	Nucleolus	1755	18S
Moquiniella rubra	DQ790132	D. Nickrent 3042	Moquiniella rubra voucher D. Nickrent 3042 ribulose-1,5-bisphosphate carboxylase/oxygenase large subunit (rbcL) gene, partial cds; chloroplast.	Malecot,V. and Nickrent,D.L.	Syst. Bot. 33 (1), 97-106 (2008)	Lorantheae	Emelianthinae	Moquiniella	genomic DNA	Chloroplast	1422	rbcL
Moquiniella rubra	DQ790171	D. Nickrent 3042	Moquiniella rubra voucher D. Nickrent 3042 maturase K (matK) gene, partial cds; chloroplast.	Malecot,V. and Nickrent,D.L.	Syst. Bot. 33 (1), 97-106 (2008)	Lorantheae	Emelianthinae	Moquiniella	genomic DNA	Chloroplast	1151	matK
Moquiniella rubra	DQ790207	D. Nickrent 3042	Moquiniella rubra 26S ribosomal RNA gene gene, partial sequence.	Vidal-Russell,R. and Nickrent,D.L.	Mol. Phylogenet. Evol. 47 (2), 523-537 (2008)	Lorantheae	Emelianthinae	Moquiniella	genomic DNA	Nucleolus	882	25S
Moquiniella rubra	AM235021	RBGK 5742	Moquiniella rubra chloroplast partial rbcL gene for ribulose bisphosphate carboxylase large subunit, specimen voucher RBGK 5742.	Forest,F., Grenyer,R., Rouget,M., Davies,T.J., Cowling,R.M.,	Nature 445 (7129), 757-760 (2007)	Lorantheae	Emelianthinae	Moquiniella	genomic DNA	Chloroplast	1319	rbcL
Moquiniella rubra	EF464489	Nickrent 3042	Moquiniella rubra tRNA-Leu (trnL) gene, partial sequence; trnL-trnF intergenic spacer, complete sequence; and tRNA-Phe (trnF) gene, partial sequence; chloroplast.	Vidal-Russell,R. and Nickrent,D.L.	Mol. Phylogenet. Evol. 47 (2), 523-537 (2008)	Lorantheae	Emelianthinae	Moquiniella	genomic DNA	Chloroplast	582	trnL/LF
Moquiniella rubra	GQ497649	UNKNOWN	Moquiniella rubra ATP synthase beta subunit (atpB) gene, partial cds; chloroplast.	Fiz-Palacios,O., Schneider,H., Heinrichs,J. and Savolainen,V.	BMC Evol. Biol. 11, 341 (2011)	Lorantheae	Emelianthinae	Moquiniella	genomic DNA	Chloroplast	1156	atpB
Muellerina bidwillii	AY572199	Calvin & Wilson AU01-16	Muellerina bidwillii internal transcribed spacer 1, 5.8S ribosomal RNA gene, and internal transcribed spacer 2, complete sequence.	Wilson,C.A. and Senge,A.M.M.	Unpublished	Lorantheae	Ileostylinae	Muellerina	genomic DNA	Nucleolus	717	ITS1; 5.8S; ITS2
Muellerina celastroides	AY572198	Calvin & Wilson AU99-11	Muellerina celastroides internal transcribed spacer 1, 5.8S ribosomal RNA gene, and internal transcribed spacer 2, complete sequence.	Wilson,C.A. and Calvin,C.L.	Unpublished	Lorantheae	Ileostylinae	Muellerina	genomic DNA	Nucleolus	685	ITS1; 5.8S; ITS2
Muellerina celastroides	DQ340590	Calvin and Wilson AU99-11	Muellerina celastroides tRNA-Leu (trnL) gene, partial sequence; and trnL-trnF intergenic spacer, complete sequence; chloroplast.	Wilson,C.A. and Calvin,C.L.	Am. J. Bot. 93 (5), 787-796 (2006)	Lorantheae	Ileostylinae	Muellerina	genomic DNA	Chloroplast	599	trnL/LF
Muellerina eucalyptoides	AY572197	Calvin & Wilson AU99-05	Muellerina eucalyptoides internal transcribed spacer 1, 5.8S ribosomal RNA gene, and internal transcribed spacer 2, complete sequence.	Wilson,C.A. and Calvin,C.L.	Unpublished	Lorantheae	Ileostylinae	Muellerina	genomic DNA	Nucleolus	686	ITS1; 5.8S; ITS2
Muellerina eucalyptoides	DQ340591	Calvin and Wilson AU99-05	Muellerina eucalyptoides tRNA-Leu (trnL) gene and trnL-trnF intergenic spacer, partial sequence; chloroplast.	Wilson,C.A. and Calvin,C.L.	Am. J. Bot. 93 (5), 787-796 (2006)	Lorantheae	Ileostylinae	Muellerina	genomic DNA	Chloroplast	605	trnL/LF
Muellerina eucalyptoides	EU544335	Nickrent 4310	Muellerina eucalyptoides voucher Nickrent 4310 small subunit ribosomal RNA gene, partial sequence.	Vidal-Russell,R. and Nickrent,D.L.	Am. J. Bot. 95 (8), 1015-1029 (2008)	Lorantheae	Ileostylinae	Muellerina	genomic DNA	Nucleolus	1632	18S
Muellerina eucalyptoides	EU544385	Nickrent 4310	Muellerina eucalyptoides voucher Nickrent 4310 26S ribosomal RNA gene, partial sequence.	Vidal-Russell,R. and Nickrent,D.L.	Am. J. Bot. 95 (8), 1015-1029 (2008)	Lorantheae	Ileostylinae	Muellerina	genomic DNA	Nucleolus	2048	25S
Muellerina eucalyptoides	EU544440	Nickrent 4310	Muellerina eucalyptoides voucher Nickrent 4310 maturase K (matK) gene, partial cds; chloroplast.	Vidal-Russell,R. and Nickrent,D.L.	Am. J. Bot. 95 (8), 1015-1029 (2008)	Lorantheae	Ileostylinae	Muellerina	genomic DNA	Chloroplast	1355	matK
Muellerina eucalyptoides	EU544472	Nickrent 4310	Muellerina eucalyptoides voucher Nickrent 4310 ribulose-1,5-bisphosphate carboxylase/oxygenase large subunit (rbcL) gene, partial cds; chloroplast.	Vidal-Russell,R. and Nickrent,D.L.	Unpublished	Lorantheae	Ileostylinae	Muellerina	genomic DNA	Chloroplast	830	rbcL
Muellerina eucalyptoides	EU544498	Nickrent 4310	Muellerina eucalyptoides voucher Nickrent 4310 tRNA-Leu (trnL) gene, partial sequence; trnL-trnF intergenic spacer, complete sequence; and tRNA-Phe (trnF) gene, partial sequence; chloroplast.	Vidal-Russell,R. and Nickrent,D.L.	Am. J. Bot. 95 (8), 1015-1029 (2008)	Lorantheae	Ileostylinae	Muellerina	genomic DNA	Chloroplast	637	trnL/LF
Muellerina flexialabastra	AY572196	Calvin & Wilson AU01-20	Muellerina flexialabastra internal transcribed spacer 1, 5.8S ribosomal RNA gene, and internal transcribed spacer 2, complete sequence.	Wilson,C.A. and Senge,A.M.M.	Unpublished	Lorantheae	Ileostylinae	Muellerina	genomic DNA	Nucleolus	684	ITS1; 5.8S; ITS2
Muellerina myrtifolia	AY572200	Calvin & Wilson AU01-21	Muellerina myrtifolia internal transcribed spacer 1, 5.8S ribosomal RNA gene, and internal transcribed spacer 2, complete sequence.	Wilson,C.A. and Senge,A.M.M.	Unpublished	Lorantheae	Ileostylinae	Muellerina	genomic DNA	Nucleolus	712	ITS1; 5.8S; ITS2
Notanthera heterophylla	DQ333855	Calvin and Wilson Cl03-03	Notanthera heterophylla internal transcribed spacer 1, partial sequence; 5.8S ribosomal RNA gene, complete sequence; and internal transcribed spacer 2, partial sequence.	Wilson,C.A. and Calvin,C.L.	Am. J. Bot. 93 (5), 787-796 (2006)	Psittacantheae	Notantherinae	Notanthera	genomic DNA	Nucleolus	663	ITS1; 5.8S; ITS2
Notanthera heterophylla	DQ340606	Calvin and Wilson Cl03-03	Notanthera heterophylla tRNA-Leu (trnL) gene and trnL-trnF intergenic spacer, partial sequence; chloroplast.	Wilson,C.A. and Calvin,C.L.	Am. J. Bot. 93 (5), 787-796 (2006)	Psittacantheae	Notantherinae	Notanthera	genomic DNA	Chloroplast	666	trnL/LF
Notanthera heterophylla	DQ442962	G. Amico 151 (BRCU)	Notanthera heterophylla atpB gene, partial sequence; atpB-rbcL intergenic spacer, complete sequence; and ribulose 1,5-bisphosphate carboxylase/oxygenase large subunit (rbcL) gene, partial cds; chloroplast.	Amico,G.C., Vidal-Russell,R. and Nickrent,D.L.	Am. J. Bot. 94 (4), 558-567 (2007)	Psittacantheae	Notantherinae	Notanthera	genomic DNA	Chloroplast	660	atpB-rbcL
Notanthera heterophylla	DQ442939	G. Amico 151 (BCRU)	Notanthera heterophylla tRNA-Leu (trnL) gene and trnL-trnF intergenic spacer, partial sequence; chloroplast.	Amico,G.C., Vidal-Russell,R. and Nickrent,D.L.	Am. J. Bot. 94 (4), 558-567 (2007)	Psittacantheae	Notantherinae	Notanthera	genomic DNA	Chloroplast	629	trnL/LF
Notanthera heterophylla	DQ442985	G. Amico 151 (BRCU)	Notanthera heterophylla 18S ribosomal RNA gene, partial sequence; internal transcribed spacer 1 and 5.8S ribosomal RNA gene, complete sequence; and internal transcribed spacer 2, partial sequence.	Amico,G.C., Vidal-Russell,R. and Nickrent,D.L.	Am. J. Bot. 94 (4), 558-567 (2007)	Psittacantheae	Notantherinae	Notanthera	genomic DNA	Nucleolus	558	ITS1; 5.8S; ITS2
Notanthera heterophylla	EF464466	Nickrent 4372	Notanthera heterophylla 18S ribosomal RNA gene, partial sequence.	Vidal-Russell,R. and Nickrent,D.L.	Mol. Phylogenet. Evol. 47 (2), 523-537 (2008)	Psittacantheae	Notantherinae	Notanthera	genomic DNA	Nucleolus	1631	18S
Notanthera heterophylla	EF464478	Nickrent 4372	Notanthera heterophylla 26S ribosomal RNA gene, partial sequence.	Vidal-Russell,R. and Nickrent,D.L.	Mol. Phylogenet. Evol. 47 (2), 523-537 (2008)	Psittacantheae	Notantherinae	Notanthera	genomic DNA	Nucleolus	938	25S
Notanthera heterophylla	EF464529	Nickrent 4372	Notanthera heterophylla ribulose-1,5-bisphosphate carboxylase/oxygenase large subunit (rbcL) gene, partial cds; chloroplast.	Vidal-Russell,R. and Nickrent,D.L.	Mol. Phylogenet. Evol. 47 (2), 523-537 (2008)	Psittacantheae	Notantherinae	Notanthera	genomic DNA	Chloroplast	1356	rbcL
Notanthera heterophylla	EF464511	Nickrent 4372	Notanthera heterophylla maturase K-like (matK) gene, partial sequence; chloroplast.	Vidal-Russell,R. and Nickrent,D.L.	Mol. Phylogenet. Evol. 47 (2), 523-537 (2008)	Psittacantheae	Notantherinae	Notanthera	genomic DNA	Chloroplast	1078	matK
Nuytsia floribunda	DQ333867	Calvin and Wilson AU01-22	Nuytsia floribunda internal transcribed spacer 1, partial sequence; 5.8S ribosomal RNA gene, complete sequence; and internal transcribed spacer 2, partial sequence.	Wilson,C.A. and Calvin,C.L.	Am. J. Bot. 93 (5), 787-796 (2006)	Nuytsieae	[n/a]	Nuytsia	genomic DNA	Nucleolus	671	ITS1; 5.8S; ITS2
Nuytsia floribunda	DQ340618	Calvin and Wilson AU01-22	Nuytsia floribunda tRNA-Leu (trnL) gene and trnL-trnF intergenic spacer, partial sequence; chloroplast.	Wilson,C.A. and Calvin,C.L.	Am. J. Bot. 93 (5), 787-796 (2006)	Nuytsieae	[n/a]	Nuytsia	genomic DNA	Chloroplast	826	trnL/LF
Nuytsia floribunda	DQ787446	Nickrent 2747	Nuytsia floribunda maturase K (matK) gene, partial cds; chloroplast.	Vidal-Russell,R. and Nickrent,D.L.	Syst. Bot. 32 (3), 560-568 (2007)	Nuytsieae	[n/a]	Nuytsia	genomic DNA	Chloroplast	1354	matK
Nuytsia floribunda	DQ788705	Nickrent 2747	Nuytsia floribunda internal transcribed spacer 1, partial sequence; 5.8S ribosomal RNA gene and internal transcribed spacer 2, complete sequence; and 26S ribosomal RNA gene, partial sequence.	Vidal-Russell,R. and Nickrent,D.L.	Syst. Bot. 32 (3), 560-568 (2007)	Nuytsieae	[n/a]	Nuytsia	genomic DNA	Nucleolus	693	ITS1; 5.8S; ITS2
Nuytsia floribunda	DQ788716	Nickrent 3080	Nuytsia floribunda tRNA-Leu (trnL) gene, partial sequence; trnL-trnF intergenic spacer, complete sequence; and tRNA-Phe (trnF) gene, partial sequence; chloroplast.	Vidal-Russell,R. and Nickrent,D.L.	Syst. Bot. 32 (3), 560-568 (2007)	Nuytsieae	[n/a]	Nuytsia	genomic DNA	Chloroplast	837	trnL/LF
Nuytsia floribunda	DQ790103	D. Nickrent 2747	Nuytsia floribunda voucher D. Nickrent 2747 small subunit ribosomal RNA gene, partial sequence.	Malecot,V. and Nickrent,D.L.	Syst. Bot. 33 (1), 97-106 (2008)	Nuytsieae	[n/a]	Nuytsia	genomic DNA	Nucleolus	1805	18S
Nuytsia floribunda	DQ790134	D. Nickrent 2747	Nuytsia floribunda voucher D. Nickrent 2747 ribulose-1,5-bisphosphate carboxylase/oxygenase large subunit (rbcL) gene, partial cds; chloroplast.	Malecot,V. and Nickrent,D.L.	Syst. Bot. 33 (1), 97-106 (2008)	Nuytsieae	[n/a]	Nuytsia	genomic DNA	Chloroplast	838	rbcL
Nuytsia floribunda	DQ790210	D. Nickrent 2747	Nuytsia floribunda 26S ribosomal RNA gene gene, partial sequence.	Vidal-Russell,R. and Nickrent,D.L.	Mol. Phylogenet. Evol. 47 (2), 523-537 (2008)	Nuytsieae	[n/a]	Nuytsia	genomic DNA	Nucleolus	873	25S
Nuytsia floribunda	DQ790239	D. Nickrent 2747	Nuytsia floribunda voucher D. Nickrent 2747 acetyl co-A carboxylase (accD) gene, partial cds; chloroplast.	Malecot,V.R. and Nickrent,D.L.	Unpublished	Nuytsieae	[n/a]	Nuytsia	genomic DNA	Chloroplast	1171	accD
Nuytsia floribunda	DQ110282	Spjut et al. 7311, US	Nuytsia floribunda NADH dehydrogenase subunit 1 (NADH1) gene, partial sequence; mitochondrial.	Davis,C.C., Anderson,W.R. and Wurdack,K.J.	Proc. Biol. Sci. 272 (1578), 2237-2242 (2005)	Nuytsieae	[n/a]	Nuytsia	genomic DNA	Mitochondrion	1698	nad1
Nuytsia floribunda	DQ110349	Spjut et al. 7311 US	Nuytsia floribunda voucher Spjut et al. 7311 US maturase (matR) gene, partial cds; mitochondrial.	Davis,C.C., Anderson,W.R. and Wurdack,K.J.	Proc. Biol. Sci. 272 (1578), 2237-2242 (2005)	Nuytsieae	[n/a]	Nuytsia	genomic DNA	Mitochondrion	1725	matR
Oedina pendens	EU544336	Nickrent 4329	Oedina pendens voucher Nickrent 4329 small subunit ribosomal RNA gene, partial sequence.	Vidal-Russell,R. and Nickrent,D.L.	Am. J. Bot. 95 (8), 1015-1029 (2008)	Lorantheae	Tapinanthinae	Oedina	genomic DNA	Nucleolus	1725	18S
Oedina pendens	EU544386	Nickrent 4329	Oedina pendens voucher Nickrent 4329 26S ribosomal RNA gene, partial sequence.	Vidal-Russell,R. and Nickrent,D.L.	Am. J. Bot. 95 (8), 1015-1029 (2008)	Lorantheae	Tapinanthinae	Oedina	genomic DNA	Nucleolus	2087	25S
Oedina pendens	EU544441	Nickrent 4329	Oedina pendens voucher Nickrent 4329 maturase K (matK) gene, partial cds; chloroplast.	Vidal-Russell,R. and Nickrent,D.L.	Am. J. Bot. 95 (8), 1015-1029 (2008)	Lorantheae	Tapinanthinae	Oedina	genomic DNA	Chloroplast	1387	matK
Oedina pendens	EU544499	Nickrent 4329	Oedina pendens voucher Nickrent 4329 tRNA-Leu (trnL) gene, partial sequence; trnL-trnF intergenic spacer, complete sequence; and tRNA-Phe (trnF) gene, partial sequence; chloroplast.	Vidal-Russell,R. and Nickrent,D.L.	Am. J. Bot. 95 (8), 1015-1029 (2008)	Lorantheae	Tapinanthinae	Oedina	genomic DNA	Chloroplast	518	trnL/LF
Oliverella rubroviridis	EU544337	Nickrent 4330	Oliverella rubroviridis voucher Nickrent 4330 small subunit ribosomal RNA gene, partial sequence.	Vidal-Russell,R. and Nickrent,D.L.	Am. J. Bot. 95 (8), 1015-1029 (2008)	Lorantheae	Emelianthinae	Oliverella	genomic DNA	Nucleolus	1720	18S
Oliverella rubroviridis	EU544387	Nickrent 4330	Oliverella rubroviridis voucher Nickrent 4330 26S ribosomal RNA gene, partial sequence.	Vidal-Russell,R. and Nickrent,D.L.	Am. J. Bot. 95 (8), 1015-1029 (2008)	Lorantheae	Emelianthinae	Oliverella	genomic DNA	Nucleolus	1866	25S
Oliverella rubroviridis	EU544442	Nickrent 4330	Oliverella rubroviridis voucher Nickrent 4330 maturase K (matK) gene, partial cds; chloroplast.	Vidal-Russell,R. and Nickrent,D.L.	Am. J. Bot. 95 (8), 1015-1029 (2008)	Lorantheae	Emelianthinae	Oliverella	genomic DNA	Chloroplast	1415	matK
Oncella ambigua	EU544338	Nickrent 4673	Oncella ambigua voucher Nickrent 4673 small subunit ribosomal RNA gene, partial sequence.	Vidal-Russell,R. and Nickrent,D.L.	Am. J. Bot. 95 (8), 1015-1029 (2008)	Lorantheae	Tapinanthinae	Oncella	genomic DNA	Nucleolus	1780	18S
Oncella ambigua	EU544443	Nickrent 4673	Oncella ambigua voucher Nickrent 4673 maturase K-like (matK) gene, partial sequence; chloroplast.	Vidal-Russell,R. and Nickrent,D.L.	Am. J. Bot. 95 (8), 1015-1029 (2008)	Lorantheae	Tapinanthinae	Oncella	genomic DNA	Chloroplast	1462	matK
Oncocalyx schimperi	DQ333825	Calvin and Wilson Y88-02	Oncocalyx schimperi internal transcribed spacer 1 and 5.8S ribosomal RNA gene, partial sequence.	Wilson,C.A. and Calvin,C.L.	Am. J. Bot. 93 (5), 787-796 (2006)	Lorantheae	Tapinanthinae	Oncocalyx	genomic DNA	Nucleolus	257	ITS1; 5.8S; ITS2
Oncocalyx schimperi	DQ340574	Calvin and Wilson Y88-02	Oncocalyx schimperi tRNA-Leu (trnL) gene and trnL-trnF intergenic spacer, partial sequence; chloroplast.	Wilson,C.A. and Calvin,C.L.	Am. J. Bot. 93 (5), 787-796 (2006)	Lorantheae	Tapinanthinae	Oncocalyx	genomic DNA	Chloroplast	634	trnL/LF
Oncocalyx sulfureus	EU544339	Nickrent 2850	Oncocalyx sulfureus voucher Nickrent 2850 small subunit ribosomal RNA gene, partial sequence.	Vidal-Russell,R. and Nickrent,D.L.	Am. J. Bot. 95 (8), 1015-1029 (2008)	Lorantheae	Tapinanthinae	Oncocalyx	genomic DNA	Nucleolus	1686	18S
Oncocalyx sulfureus	EU544388	Nickrent 2850	Oncocalyx sulfureus voucher Nickrent 2850 26S ribosomal RNA gene, partial sequence.	Vidal-Russell,R. and Nickrent,D.L.	Am. J. Bot. 95 (8), 1015-1029 (2008)	Lorantheae	Tapinanthinae	Oncocalyx	genomic DNA	Nucleolus	1943	25S
Oncocalyx sulfureus	EU544444	Nickrent 2850	Oncocalyx sulfureus voucher Nickrent 2850 maturase K (matK) gene, partial cds; chloroplast.	Vidal-Russell,R. and Nickrent,D.L.	Am. J. Bot. 95 (8), 1015-1029 (2008)	Lorantheae	Tapinanthinae	Oncocalyx	genomic DNA	Chloroplast	1392	matK
Oncocalyx sulfureus	EU544500	Nickrent 2850	Oncocalyx sulfureus voucher Nickrent 2850 tRNA-Leu (trnL) gene, partial sequence; trnL-trnF intergenic spacer, complete sequence; and tRNA-Phe (trnF) gene, partial sequence; chloroplast.	Vidal-Russell,R. and Nickrent,D.L.	Am. J. Bot. 95 (8), 1015-1029 (2008)	Lorantheae	Tapinanthinae	Oncocalyx	genomic DNA	Chloroplast	613	trnL/LF
Oryctanthus cordifolius	JQ592409	BioBot06595	Oryctanthus cordifolius voucher BioBot06595 ribulose-1,5-bisphosphate carboxylase/oxygenase large subunit (rbcL) gene, partial cds; chloroplast.	International Barcode of Life (iBOL)	Unpublished	Psittacantheae	Psittacanthinae	Oryctanthus	genomic DNA	Chloroplast	509	rbcL
Oryctanthus occidentalis	L24408	UNKNOWN	Oryctanthus occidentalis (Presl.) Urban 18S ribosomal RNA gene, partial sequence.	Nickrent,D.L. and Duff,R.J.	(in) Moreno,M.T., Cubero,J.I., Berner,D., Joel,D., Musselman,L.J.	Psittacantheae	Psittacanthinae	Oryctanthus	genomic DNA	Nucleolus	1753	18S
Oryctanthus occidentalis	BD075329	UNKNOWN	Method of identifying molecule homing to angiogenesis vascular system in tumor.	Ruoslahti,E. and Pasqualini,R.	Patent: JP 2001516055-A 5 25-SEP-2001;	Psittacantheae	Psittacanthinae	Oryctanthus	genomic DNA	Nucleolus	38	[unknown]
Oryctanthus occidentalis	BD075330	UNKNOWN	Method of identifying molecule homing to angiogenesis vascular system in tumor.	Ruoslahti,E. and Pasqualini,R.	Patent: JP 2001516055-A 6 25-SEP-2001;	Psittacantheae	Psittacanthinae	Oryctanthus	genomic DNA	Nucleolus	38	[unknown]
Oryctanthus occidentalis	BD075331	UNKNOWN	Method of identifying molecule homing to angiogenesis vascular system in tumor.	Ruoslahti,E. and Pasqualini,R.	Patent: JP 2001516055-A 7 25-SEP-2001;	Psittacantheae	Psittacanthinae	Oryctanthus	genomic DNA	Nucleolus	38	[unknown]
Oryctanthus occidentalis	BD075332	UNKNOWN	Method of identifying molecule homing to angiogenesis vascular system in tumor.	Ruoslahti,E. and Pasqualini,R.	Patent: JP 2001516055-A 8 25-SEP-2001;	Psittacantheae	Psittacanthinae	Oryctanthus	genomic DNA	Nucleolus	42	[unknown]
Oryctanthus occidentalis	BD075333	UNKNOWN	Method of identifying molecule homing to angiogenesis vascular system in tumor.	Ruoslahti,E. and Pasqualini,R.	Patent: JP 2001516055-A 9 25-SEP-2001;	Psittacantheae	Psittacanthinae	Oryctanthus	genomic DNA	Nucleolus	42	[unknown]
Oryctanthus occidentalis	BD075334	UNKNOWN	Method of identifying molecule homing to angiogenesis vascular system in tumor.	Ruoslahti,E. and Pasqualini,R.	Patent: JP 2001516055-A 10 25-SEP-2001;	Psittacantheae	Psittacanthinae	Oryctanthus	genomic DNA	Nucleolus	41	[unknown]
Oryctanthus occidentalis	BD075335	UNKNOWN	Method of identifying molecule homing to angiogenesis vascular system in tumor.	Ruoslahti,E. and Pasqualini,R.	Patent: JP 2001516055-A 11 25-SEP-2001;	Psittacantheae	Psittacanthinae	Oryctanthus	genomic DNA	Nucleolus	40	[unknown]
Oryctanthus occidentalis	BD075336	UNKNOWN	Method of identifying molecule homing to angiogenesis vascular system in tumor.	Ruoslahti,E. and Pasqualini,R.	Patent: JP 2001516055-A 12 25-SEP-2001;	Psittacantheae	Psittacanthinae	Oryctanthus	genomic DNA	Nucleolus	45	[unknown]
Oryctanthus occidentalis	BD075337	UNKNOWN	Method of identifying molecule homing to angiogenesis vascular system in tumor.	Ruoslahti,E. and Pasqualini,R.	Patent: JP 2001516055-A 13 25-SEP-2001;	Psittacantheae	Psittacanthinae	Oryctanthus	genomic DNA	Nucleolus	42	[unknown]
Oryctanthus occidentalis	BD075338	UNKNOWN	Method of identifying molecule homing to angiogenesis vascular system in tumor.	Ruoslahti,E. and Pasqualini,R.	Patent: JP 2001516055-A 14 25-SEP-2001;	Psittacantheae	Psittacanthinae	Oryctanthus	genomic DNA	Nucleolus	42	[unknown]
Oryctanthus occidentalis	BD075339	UNKNOWN	Method of identifying molecule homing to angiogenesis vascular system in tumor.	Ruoslahti,E. and Pasqualini,R.	Patent: JP 2001516055-A 15 25-SEP-2001;	Psittacantheae	Psittacanthinae	Oryctanthus	genomic DNA	Nucleolus	42	[unknown]
Oryctanthus occidentalis	BD075340	UNKNOWN	Method of identifying molecule homing to angiogenesis vascular system in tumor.	Ruoslahti,E. and Pasqualini,R.	Patent: JP 2001516055-A 16 25-SEP-2001;	Psittacantheae	Psittacanthinae	Oryctanthus	genomic DNA	Nucleolus	44	[unknown]
Oryctanthus occidentalis	BD075341	UNKNOWN	Method of identifying molecule homing to angiogenesis vascular system in tumor.	Ruoslahti,E. and Pasqualini,R.	Patent: JP 2001516055-A 17 25-SEP-2001;	Psittacantheae	Psittacanthinae	Oryctanthus	genomic DNA	Nucleolus	46	[unknown]
Oryctanthus occidentalis	BD075342	UNKNOWN	Method of identifying molecule homing to angiogenesis vascular system in tumor.	Ruoslahti,E. and Pasqualini,R.	Patent: JP 2001516055-A 18 25-SEP-2001;	Psittacantheae	Psittacanthinae	Oryctanthus	genomic DNA	Nucleolus	41	[unknown]
Oryctanthus occidentalis	BD075343	UNKNOWN	Method of identifying molecule homing to angiogenesis vascular system in tumor.	Ruoslahti,E. and Pasqualini,R.	Patent: JP 2001516055-A 19 25-SEP-2001;	Psittacantheae	Psittacanthinae	Oryctanthus	genomic DNA	Nucleolus	41	[unknown]
Oryctanthus occidentalis	AX709293	UNKNOWN	Sequence 28 from Patent WO02064822.	Kuhn,M. and Mergemeier,S.	Patent: WO 02064822-A2 28 22-AUG-2002;	Psittacantheae	Psittacanthinae	Oryctanthus	unassigned DNA	Nucleolus	1139	[unknown]
Oryctanthus occidentalis	DQ333862	Calvin and Wilson CR01-11	Oryctanthus occidentalis internal transcribed spacer 1, partial sequence; 5.8S ribosomal RNA gene, complete sequence; and internal transcribed spacer 2, partial sequence.	Wilson,C.A. and Calvin,C.L.	Am. J. Bot. 93 (5), 787-796 (2006)	Psittacantheae	Psittacanthinae	Oryctanthus	genomic DNA	Nucleolus	674	ITS1; 5.8S; ITS2
Oryctanthus occidentalis	DQ340613	Calvin and Wilson CR01-11	Oryctanthus occidentalis tRNA-Leu (trnL) gene and trnL-trnF intergenic spacer, partial sequence; chloroplast.	Wilson,C.A. and Calvin,C.L.	Am. J. Bot. 93 (5), 787-796 (2006)	Psittacantheae	Psittacanthinae	Oryctanthus	genomic DNA	Chloroplast	638	trnL/LF
Oryctanthus occidentalis	EU544389	Nickrent 2763	Oryctanthus occidentalis voucher Nickrent 2763 26S ribosomal RNA gene, partial sequence.	Vidal-Russell,R. and Nickrent,D.L.	Am. J. Bot. 95 (8), 1015-1029 (2008)	Psittacantheae	Psittacanthinae	Oryctanthus	genomic DNA	Nucleolus	2137	25S
Oryctanthus occidentalis	EU544445	Nickrent 2763	Oryctanthus occidentalis voucher Nickrent 2763 maturase K (matK) gene, partial cds; chloroplast.	Vidal-Russell,R. and Nickrent,D.L.	Am. J. Bot. 95 (8), 1015-1029 (2008)	Psittacantheae	Psittacanthinae	Oryctanthus	genomic DNA	Chloroplast	1369	matK
Oryctanthus occidentalis	EU544501	Nickrent 2763	Oryctanthus occidentalis voucher Nickrent 2763 tRNA-Leu (trnL) gene and trnL-trnF intergenic spacer, partial sequence; chloroplast.	Vidal-Russell,R. and Nickrent,D.L.	Am. J. Bot. 95 (8), 1015-1029 (2008)	Psittacantheae	Psittacanthinae	Oryctanthus	genomic DNA	Chloroplast	396	trnL/LF
Peraxilla tetrapetala	DQ333846	Calvin and Wilson NZ98-03	Peraxilla tetrapetala internal transcribed spacer 1, partial sequence; 5.8S ribosomal RNA gene, complete sequence; and internal transcribed spacer 2, partial sequence.	Wilson,C.A. and Calvin,C.L.	Am. J. Bot. 93 (5), 787-796 (2006)	Elytrantheae	[n/a]	Peraxilla	genomic DNA	Nucleolus	703	ITS1; 5.8S; ITS2
Peraxilla tetrapetala	DQ340597	Calvin and Wilson NZ98-03	Peraxilla tetrapetala tRNA-Leu (trnL) gene and trnL-trnF intergenic spacer, partial sequence; chloroplast.	Wilson,C.A. and Calvin,C.L.	Am. J. Bot. 93 (5), 787-796 (2006)	Elytrantheae	[n/a]	Peraxilla	genomic DNA	Chloroplast	636	trnL/LF
Peraxilla tetrapetala	EU544340	Nickrent 2744	Peraxilla tetrapetala voucher Nickrent 2744 small subunit ribosomal RNA gene, partial sequence.	Vidal-Russell,R. and Nickrent,D.L.	Am. J. Bot. 95 (8), 1015-1029 (2008)	Elytrantheae	[n/a]	Peraxilla	genomic DNA	Nucleolus	1676	18S
Peraxilla tetrapetala	EU544390	Nickrent 2744	Peraxilla tetrapetala voucher Nickrent 2744 26S ribosomal RNA gene, partial sequence.	Vidal-Russell,R. and Nickrent,D.L.	Am. J. Bot. 95 (8), 1015-1029 (2008)	Elytrantheae	[n/a]	Peraxilla	genomic DNA	Nucleolus	2037	25S
Peraxilla tetrapetala	EU544446	Nickrent 2744	Peraxilla tetrapetala voucher Nickrent 2744 maturase K (matK) gene, partial cds; chloroplast.	Vidal-Russell,R. and Nickrent,D.L.	Am. J. Bot. 95 (8), 1015-1029 (2008)	Elytrantheae	[n/a]	Peraxilla	genomic DNA	Chloroplast	1340	matK
Peraxilla tetrapetala	EU544473	Nickrent 2744	Peraxilla tetrapetala voucher Nickrent 2744 ribulose-1,5-bisphosphate carboxylase/oxygenase large subunit (rbcL) gene, partial cds; chloroplast.	Vidal-Russell,R. and Nickrent,D.L.	Unpublished	Elytrantheae	[n/a]	Peraxilla	genomic DNA	Chloroplast	830	rbcL
Peraxilla tetrapetala	EU544502	Nickrent 2744	Peraxilla tetrapetala voucher Nickrent 2744 tRNA-Leu (trnL) gene, partial sequence; trnL-trnF intergenic spacer, complete sequence; and tRNA-Phe (trnF) gene, partial sequence; chloroplast.	Vidal-Russell,R. and Nickrent,D.L.	Am. J. Bot. 95 (8), 1015-1029 (2008)	Elytrantheae	[n/a]	Peraxilla	genomic DNA	Chloroplast	616	trnL/LF
Peraxilla tetrapetala	JQ933439	P. Douglass, 8714, (RNG)	Peraxilla tetrapetala voucher P. Douglass, 8714, (RNG) ribulose-1,5-bisphosphate carboxylase/oxygenase large subunit (rbcL) gene, partial cds; plastid.	Saslis-Lagoudakis,C.H., Savolainen,V., Williamson,E.M., Forest,F.,	Proc. Natl. Acad. Sci. U.S.A. 109 (39), 15835-15840 (2012)	Elytrantheae	[n/a]	Peraxilla	genomic DNA	Chloroplast	1383	rbcL
Phragmanthera crassicaulis	EU544341	Nickrent 3037	Phragmanthera crassicaulis voucher Nickrent 3037 small subunit ribosomal RNA gene, partial sequence.	Vidal-Russell,R. and Nickrent,D.L.	Am. J. Bot. 95 (8), 1015-1029 (2008)	Lorantheae	Emelianthinae	Phragmanthera	genomic DNA	Nucleolus	1725	18S
Phragmanthera crassicaulis	EU544391	Phragmanthera 3037	Phragmanthera crassicaulis voucher Phragmanthera 3037 26S ribosomal RNA gene, partial sequence.	Vidal-Russell,R. and Nickrent,D.L.	Am. J. Bot. 95 (8), 1015-1029 (2008)	Lorantheae	Emelianthinae	Phragmanthera	genomic DNA	Nucleolus	2145	25S
Phragmanthera crassicaulis	EU544447	Nickrent 3037	Phragmanthera crassicaulis voucher Nickrent 3037 maturase K (matK) gene, partial cds; chloroplast.	Vidal-Russell,R. and Nickrent,D.L.	Am. J. Bot. 95 (8), 1015-1029 (2008)	Lorantheae	Emelianthinae	Phragmanthera	genomic DNA	Chloroplast	1373	matK
Phragmanthera crassicaulis	EU544503	Nickrent 3037	Phragmanthera crassicaulis voucher Nickrent 3037 tRNA-Leu (trnL) gene, partial sequence; trnL-trnF intergenic spacer, complete sequence; and tRNA-Phe (trnF) gene, partial sequence; chloroplast.	Vidal-Russell,R. and Nickrent,D.L.	Am. J. Bot. 95 (8), 1015-1029 (2008)	Lorantheae	Emelianthinae	Phragmanthera	genomic DNA	Chloroplast	586	trnL/LF
Phragmanthera regularis	DQ333830	Calvin and Wilson Y88-01	Phragmanthera regularis internal transcribed spacer 1, partial sequence; 5.8S ribosomal RNA gene, complete sequence; and internal transcribed spacer 2, partial sequence.	Wilson,C.A. and Calvin,C.L.	Am. J. Bot. 93 (5), 787-796 (2006)	Lorantheae	Emelianthinae	Phragmanthera	genomic DNA	Nucleolus	564	ITS1; 5.8S; ITS2
Phragmanthera regularis	DQ340579	Calvin and Wilson Y88-01	Phragmanthera regularis tRNA-Leu (trnL) gene and trnL-trnF intergenic spacer, partial sequence; chloroplast.	Wilson,C.A. and Calvin,C.L.	Am. J. Bot. 93 (5), 787-796 (2006)	Lorantheae	Emelianthinae	Phragmanthera	genomic DNA	Chloroplast	633	trnL/LF
Passovia pyrifolia	L24412	UNKNOWN	Phthirusa pyrifolia (H.B.K.) Eichler 18S ribosomal RNA gene, partial sequence.	Nickrent,D.L. and Duff,R.J.	(in) Moreno,M.T., Cubero,J.I., Berner,D., Joel,D., Musselman,L.J.	Psittacantheae	Psittacanthinae	Passovia	genomic DNA	Nucleolus	1763	18S
Passovia pyrifolia	DQ333857	Calvin and Wilson CR01-03	Phthirusa pyrifolia internal transcribed spacer 1, partial sequence; 5.8S ribosomal RNA gene, complete sequence; and internal transcribed spacer 2, partial sequence.	Wilson,C.A. and Calvin,C.L.	Am. J. Bot. 93 (5), 787-796 (2006)	Psittacantheae	Psittacanthinae	Passovia	genomic DNA	Nucleolus	671	ITS1; 5.8S; ITS2
Passovia pyrifolia	DQ340608	Calvin and Wilson CR01-03	Phthirusa pyrifolia tRNA-Leu (trnL) gene and trnL-trnF intergenic spacer, partial sequence; chloroplast.	Wilson,C.A. and Calvin,C.L.	Am. J. Bot. 93 (5), 787-796 (2006)	Psittacantheae	Psittacanthinae	Passovia	genomic DNA	Chloroplast	630	trnL/LF
Passovia pyrifolia	EU544392	Nickrent 2762	Phthirusa pyrifolia voucher Nickrent 2762 26S ribosomal RNA gene, partial sequence.	Vidal-Russell,R. and Nickrent,D.L.	Am. J. Bot. 95 (8), 1015-1029 (2008)	Psittacantheae	Psittacanthinae	Passovia	genomic DNA	Nucleolus	2097	25S
Passovia pyrifolia	EU544448	Nickrent 2762	Phthirusa pyrifolia voucher Nickrent 2762 maturase K (matK) gene, partial cds; chloroplast.	Vidal-Russell,R. and Nickrent,D.L.	Am. J. Bot. 95 (8), 1015-1029 (2008)	Psittacantheae	Psittacanthinae	Passovia	genomic DNA	Chloroplast	1267	matK
Passovia pyrifolia	EU544504	Nickrent 2762	Phthirusa pyrifolia voucher Nickrent 2762 tRNA-Leu (trnL) gene, partial sequence; trnL-trnF intergenic spacer, complete sequence; and tRNA-Phe (trnF) gene, partial sequence; chloroplast.	Vidal-Russell,R. and Nickrent,D.L.	Am. J. Bot. 95 (8), 1015-1029 (2008)	Psittacantheae	Psittacanthinae	Passovia	genomic DNA	Chloroplast	644	trnL/LF
Plicosepalus curviflorus	DQ333826	Calvin and Wilson Y88-03	Plicosepalus curviflorus internal transcribed spacer 1, partial sequence; 5.8S ribosomal RNA gene, complete sequence; and internal transcribed spacer 2, partial sequence.	Wilson,C.A. and Calvin,C.L.	Am. J. Bot. 93 (5), 787-796 (2006)	Lorantheae	Tapinanthinae	Plicosepalus	genomic DNA	Nucleolus	606	ITS1; 5.8S; ITS2
Plicosepalus curviflorus	DQ340575	Calvin and Wilson Y88-03	Plicosepalus curviflorus tRNA-Leu (trnL) gene and trnL-trnF intergenic spacer, partial sequence; chloroplast.	Wilson,C.A. and Calvin,C.L.	Am. J. Bot. 93 (5), 787-796 (2006)	Lorantheae	Tapinanthinae	Plicosepalus	genomic DNA	Chloroplast	607	trnL/LF
Plicosepalus sagittifolius	EU544342	Nickrent 2852	Plicosepalus sagittifolius voucher Nickrent 2852 small subunit ribosomal RNA gene, partial sequence.	Vidal-Russell,R. and Nickrent,D.L.	Am. J. Bot. 95 (8), 1015-1029 (2008)	Lorantheae	Tapinanthinae	Plicosepalus	genomic DNA	Nucleolus	1591	18S
Plicosepalus sagittifolius	EU544393	Nickrent 2852	Plicosepalus sagittifolius voucher Nickrent 2852 26S ribosomal RNA gene, partial sequence.	Vidal-Russell,R. and Nickrent,D.L.	Am. J. Bot. 95 (8), 1015-1029 (2008)	Lorantheae	Tapinanthinae	Plicosepalus	genomic DNA	Nucleolus	1917	25S
Plicosepalus sagittifolius	EU544449	Nickrent 2852	Plicosepalus sagittifolius voucher Nickrent 2852 maturase K (matK) gene, partial cds; chloroplast.	Vidal-Russell,R. and Nickrent,D.L.	Am. J. Bot. 95 (8), 1015-1029 (2008)	Lorantheae	Tapinanthinae	Plicosepalus	genomic DNA	Chloroplast	1420	matK
Psittacanthus angustifolius	L24414	UNKNOWN	Psittacanthus angustifolius 18S ribosomal RNA gene, partial sequence.	Nickrent,D.L. and Duff,R.J.	(in) Moreno,M.T., Cubero,J.I., Berner,D., Joel,D., Musselman,L.J.	Psittacantheae	Psittacanthinae	Psittacanthus	genomic DNA	Nucleolus	1753	18S
Psittacanthus calyculatus	EU544394	Nickrent 4043	Psittacanthus calyculatus voucher Nickrent 4043 26S ribosomal RNA gene, partial sequence.	Vidal-Russell,R. and Nickrent,D.L.	Am. J. Bot. 95 (8), 1015-1029 (2008)	Psittacantheae	Psittacanthinae	Psittacanthus	genomic DNA	Nucleolus	1639	25S
Psittacanthus calyculatus	EU544450	Nickrent 4043	Psittacanthus calyculatus voucher Nickrent 4043 maturase K-like (matK) gene, partial sequence; chloroplast.	Vidal-Russell,R. and Nickrent,D.L.	Am. J. Bot. 95 (8), 1015-1029 (2008)	Psittacantheae	Psittacanthinae	Psittacanthus	genomic DNA	Chloroplast	1256	matK
Psittacanthus schiedeanus	DQ333859	Calvin and Wilson CR01-09	Psittacanthus schiedeanus internal transcribed spacer 1, partial sequence; 5.8S ribosomal RNA gene, complete sequence; and internal transcribed spacer 2, partial sequence.	Wilson,C.A. and Calvin,C.L.	Am. J. Bot. 93 (5), 787-796 (2006)	Psittacantheae	Psittacanthinae	Psittacanthus	genomic DNA	Nucleolus	670	ITS1; 5.8S; ITS2
Psittacanthus schiedeanus	DQ340610	Calvin and Wilson CR01-09	Psittacanthus schiedeanus tRNA-Leu (trnL) gene and trnL-trnF intergenic spacer, partial sequence; chloroplast.	Wilson,C.A. and Calvin,C.L.	Am. J. Bot. 93 (5), 787-796 (2006)	Psittacantheae	Psittacanthinae	Psittacanthus	genomic DNA	Chloroplast	613	trnL/LF
Scurrula atropurpurea	KC961635	A. Chaveerach 865	Scurrula atropurpurea voucher A. Chaveerach 865 PsbA (psbA) gene, partial cds; psbA-trnH intergenic spacer, complete sequence; and tRNA-His gene, partial sequence; chloroplast.	Chaveerach,A., Sudmoon,R., Noikotr,K., Kwanda,N. and Tanee,T.	Unpublished	Lorantheae	Scurrulinae	Scurrula	genomic DNA	Chloroplast	250	trnH-psbA
Scurrula atropurpurea	KF114862	UNKNOWN	Scurrula atropurpurea ribulose 1,5-bisphosphate carboxylase (rbcL) gene, partial cds; chloroplast.	Chaveerach,A., Sudmoon,R., Noikotr,K., Kwanda,N. and Tanee,T.	Unpublished	Lorantheae	Scurrulinae	Scurrula	genomic DNA	Chloroplast	561	rbcL
Scurrula chingii	AY191134	UNKNOWN	Scurrula chingii tRNA-Leu (trnL) gene, partial sequence; chloroplast gene for chloroplast product.	Han,R.L., Hao,G. and Zhang,D.X.	Unpublished	Lorantheae	Scurrulinae	Scurrula	genomic DNA	Chloroplast	302	trnL/LF
Scurrula chingii	HQ317773	LS25	Scurrula chingii voucher LS25 ribulose-1,5-bisphosphate carboxylase/oxygenase large subunit (rbcL) gene, partial cds; chloroplast.	Li,Y.-H., Chen,S.-L., Yao,H. and Luo,K.	Unpublished	Lorantheae	Scurrulinae	Scurrula	genomic DNA	Chloroplast	703	rbcL
Scurrula chingii	HQ317774	LS26	Scurrula chingii voucher LS26 ribulose-1,5-bisphosphate carboxylase/oxygenase large subunit (rbcL) gene, partial cds; chloroplast.	Li,Y.-H., Chen,S.-L., Yao,H. and Luo,K.	Unpublished	Lorantheae	Scurrulinae	Scurrula	genomic DNA	Chloroplast	703	rbcL
Scurrula chingii	HQ317814	LS25	Scurrula chingii voucher LS25 PsbA (psbA) gene, partial cds; psbA-trnH intergenic spacer, complete sequence; and tRNA-His (trnH) gene, partial sequence; chloroplast.	Li,Y.-H., Chen,S.-L., Yao,H. and Luo,K.	Unpublished	Lorantheae	Scurrulinae	Scurrula	genomic DNA	Chloroplast	245	trnH-psbA
Scurrula chingii	HQ317815	LS26	Scurrula chingii voucher LS26 PsbA (psbA) gene, partial cds; psbA-trnH intergenic spacer, complete sequence; and tRNA-His (trnH) gene, partial sequence; chloroplast.	Li,Y.-H., Chen,S.-L., Yao,H. and Luo,K.	Unpublished	Lorantheae	Scurrulinae	Scurrula	genomic DNA	Chloroplast	245	trnH-psbA
Scurrula ferruginea	DQ333827	Calvin and Wilson B02-02	Scurrula ferruginea internal transcribed spacer 1, partial sequence; 5.8S ribosomal RNA gene, complete sequence; and internal transcribed spacer 2, partial sequence.	Wilson,C.A. and Calvin,C.L.	Am. J. Bot. 93 (5), 787-796 (2006)	Lorantheae	Scurrulinae	Scurrula	genomic DNA	Nucleolus	611	ITS1; 5.8S; ITS2
Scurrula ferruginea	DQ340576	Calvin and Wilson B02-02	Scurrula ferruginea tRNA-Leu (trnL) gene and trnL-trnF intergenic spacer, partial sequence; chloroplast.	Wilson,C.A. and Calvin,C.L.	Am. J. Bot. 93 (5), 787-796 (2006)	Lorantheae	Scurrulinae	Scurrula	genomic DNA	Chloroplast	590	trnL/LF
Scurrula ferruginea	EU544343	Nickrent 4008	Scurrula ferruginea voucher Nickrent 4008 small subunit ribosomal RNA gene, partial sequence.	Vidal-Russell,R. and Nickrent,D.L.	Am. J. Bot. 95 (8), 1015-1029 (2008)	Lorantheae	Scurrulinae	Scurrula	genomic DNA	Nucleolus	1685	18S
Scurrula ferruginea	EU544395	Nickrent 4008	Scurrula ferruginea voucher Nickrent 4008 26S ribosomal RNA gene, partial sequence.	Vidal-Russell,R. and Nickrent,D.L.	Am. J. Bot. 95 (8), 1015-1029 (2008)	Lorantheae	Scurrulinae	Scurrula	genomic DNA	Nucleolus	1997	25S
Scurrula ferruginea	EU544451	Nickrent 4008	Scurrula ferruginea voucher Nickrent 4008 maturase K-like (matK) gene, partial sequence; chloroplast.	Vidal-Russell,R. and Nickrent,D.L.	Am. J. Bot. 95 (8), 1015-1029 (2008)	Lorantheae	Scurrulinae	Scurrula	genomic DNA	Chloroplast	1450	matK
Scurrula ferruginea	EU544505	Nickrent 4008	Scurrula ferruginea voucher Nickrent 4008 tRNA-Leu (trnL) gene and trnL-trnF intergenic spacer, partial sequence; chloroplast.	Vidal-Russell,R. and Nickrent,D.L.	Am. J. Bot. 95 (8), 1015-1029 (2008)	Lorantheae	Scurrulinae	Scurrula	genomic DNA	Chloroplast	549	trnL/LF
Scurrula ferruginea	KC961636	A. Chaveerach 864	Scurrula ferruginea voucher A. Chaveerach 864 PsbA (psbA) gene, partial cds; psbA-trnH intergenic spacer, complete sequence; and tRNA-His gene, partial sequence; chloroplast.	Chaveerach,A., Sudmoon,R., Noikotr,K., Kwanda,N. and Tanee,T.	Unpublished	Lorantheae	Scurrulinae	Scurrula	genomic DNA	Chloroplast	248	trnH-psbA
Scurrula ferruginea	KF114863	UNKNOWN	Scurrula ferruginea ribulose 1,5-bisphosphate carboxylase (rbcL) gene, partial cds; chloroplast.	Chaveerach,A., Sudmoon,R., Noikotr,K., Kwanda,N. and Tanee,T.	Unpublished	Lorantheae	Scurrulinae	Scurrula	genomic DNA	Chloroplast	558	rbcL
Scurrula notothixoides	AY191147	UNKNOWN	Scurrula notothixoides tRNA-Leu (trnL) gene, partial sequence; chloroplast gene for chloroplast product.	Han,R.L., Hao,G. and Zhang,D.X.	Unpublished	Lorantheae	Scurrulinae	Scurrula	genomic DNA	Chloroplast	356	trnL/LF
Scurrula parasitica	EU544345	Nickrent 4004	Scurrula parasitica voucher Nickrent 4004 small subunit ribosomal RNA gene, partial sequence.	Vidal-Russell,R. and Nickrent,D.L.	Am. J. Bot. 95 (8), 1015-1029 (2008)	Lorantheae	Scurrulinae	Scurrula	genomic DNA	Nucleolus	1594	18S
Scurrula parasitica	EU544397	Nickrent 4004	Scurrula parasitica voucher Nickrent 4004 26S ribosomal RNA gene, partial sequence.	Vidal-Russell,R. and Nickrent,D.L.	Am. J. Bot. 95 (8), 1015-1029 (2008)	Lorantheae	Scurrulinae	Scurrula	genomic DNA	Nucleolus	1480	25S
Scurrula parasitica	EU544453	Nickrent 4004	Scurrula parasitica voucher Nickrent 4004 maturase K (matK) gene, partial cds; chloroplast.	Vidal-Russell,R. and Nickrent,D.L.	Am. J. Bot. 95 (8), 1015-1029 (2008)	Lorantheae	Scurrulinae	Scurrula	genomic DNA	Chloroplast	1329	matK
Scurrula parasitica	HQ317775	LS18	Scurrula parasitica voucher LS18 ribulose-1,5-bisphosphate carboxylase/oxygenase large subunit (rbcL) gene, partial cds; chloroplast.	Li,Y.-H., Chen,S.-L., Yao,H. and Luo,K.	Unpublished	Lorantheae	Scurrulinae	Scurrula	genomic DNA	Chloroplast	703	rbcL
Scurrula parasitica	HQ317776	LS19	Scurrula parasitica voucher LS19 ribulose-1,5-bisphosphate carboxylase/oxygenase large subunit (rbcL) gene, partial cds; chloroplast.	Li,Y.-H., Chen,S.-L., Yao,H. and Luo,K.	Unpublished	Lorantheae	Scurrulinae	Scurrula	genomic DNA	Chloroplast	703	rbcL
Scurrula parasitica	HQ317777	LS57	Scurrula parasitica voucher LS57 ribulose-1,5-bisphosphate carboxylase/oxygenase large subunit (rbcL) gene, partial cds; chloroplast.	Li,Y.-H., Chen,S.-L., Yao,H. and Luo,K.	Unpublished	Lorantheae	Scurrulinae	Scurrula	genomic DNA	Chloroplast	703	rbcL
Scurrula parasitica	HQ317816	LS18	Scurrula parasitica voucher LS18 PsbA (psbA) gene, partial cds; psbA-trnH intergenic spacer, complete sequence; and tRNA-His (trnH) gene, partial sequence; chloroplast.	Li,Y.-H., Chen,S.-L., Yao,H. and Luo,K.	Unpublished	Lorantheae	Scurrulinae	Scurrula	genomic DNA	Chloroplast	213	trnH-psbA
Scurrula parasitica	HQ317817	LS19	Scurrula parasitica voucher LS19 PsbA (psbA) gene, partial cds; psbA-trnH intergenic spacer, complete sequence; and tRNA-His (trnH) gene, partial sequence; chloroplast.	Li,Y.-H., Chen,S.-L., Yao,H. and Luo,K.	Unpublished	Lorantheae	Scurrulinae	Scurrula	genomic DNA	Chloroplast	213	trnH-psbA
Scurrula parasitica	HQ317818	LS57	Scurrula parasitica voucher LS57 PsbA (psbA) gene, partial cds; psbA-trnH intergenic spacer, complete sequence; and tRNA-His (trnH) gene, partial sequence; chloroplast.	Li,Y.-H., Chen,S.-L., Yao,H. and Luo,K.	Unpublished	Lorantheae	Scurrulinae	Scurrula	genomic DNA	Chloroplast	213	trnH-psbA
Scurrula parasitica	AY191141	UNKNOWN	Scurrula parasitica var. graciliflora tRNA-Leu (trnL) gene, partial sequence; chloroplast gene for chloroplast product.	Han,R.L., Hao,G. and Zhang,D.X.	Unpublished	Lorantheae	Scurrulinae	Scurrula	genomic DNA	Chloroplast	306	trnL/LF
Scurrula parasitica	HQ317778	LS23	Scurrula parasitica var. graciliflora voucher LS23 ribulose-1,5-bisphosphate carboxylase/oxygenase large subunit (rbcL) gene, partial cds; chloroplast.	Li,Y.-H., Chen,S.-L., Yao,H. and Luo,K.	Unpublished	Lorantheae	Scurrulinae	Scurrula	genomic DNA	Chloroplast	703	rbcL
Scurrula parasitica	HQ317779	LS58	Scurrula parasitica var. graciliflora voucher LS58 ribulose-1,5-bisphosphate carboxylase/oxygenase large subunit (rbcL) gene, partial cds; chloroplast.	Li,Y.-H., Chen,S.-L., Yao,H. and Luo,K.	Unpublished	Lorantheae	Scurrulinae	Scurrula	genomic DNA	Chloroplast	703	rbcL
Scurrula parasitica	HQ317819	LS23	Scurrula parasitica var. graciliflora voucher LS23 PsbA (psbA) gene, partial cds; psbA-trnH intergenic spacer, complete sequence; and tRNA-His (trnH) gene, partial sequence; chloroplast.	Li,Y.-H., Chen,S.-L., Yao,H. and Luo,K.	Unpublished	Lorantheae	Scurrulinae	Scurrula	genomic DNA	Chloroplast	213	trnH-psbA
Scurrula parasitica	HQ317820	LS58	Scurrula parasitica var. graciliflora voucher LS58 PsbA (psbA) gene, partial cds; psbA-trnH intergenic spacer, complete sequence; and tRNA-His (trnH) gene, partial sequence; chloroplast.	Li,Y.-H., Chen,S.-L., Yao,H. and Luo,K.	Unpublished	Lorantheae	Scurrulinae	Scurrula	genomic DNA	Chloroplast	213	trnH-psbA
Scurrula parasitica	AY191138	UNKNOWN	Scurrula parasitica var. parasitica tRNA-Leu (trnL) gene, partial sequence; chloroplast gene for chloroplast product.	Han,R.L., Hao,G. and Zhang,D.X.	Unpublished	Lorantheae	Scurrulinae	Scurrula	genomic DNA	Chloroplast	304	trnL/LF
Scurrula pulverulenta	EU544344	Nickrent 4159	Scurrula pulverulenta voucher Nickrent 4159 small subunit ribosomal RNA gene, partial sequence.	Vidal-Russell,R. and Nickrent,D.L.	Am. J. Bot. 95 (8), 1015-1029 (2008)	Lorantheae	Scurrulinae	Scurrula	genomic DNA	Nucleolus	1711	18S
Scurrula pulverulenta	EU544396	Nickrent 4159	Scurrula pulverulenta voucher Nickrent 4159 26S ribosomal RNA gene, partial sequence.	Vidal-Russell,R. and Nickrent,D.L.	Am. J. Bot. 95 (8), 1015-1029 (2008)	Lorantheae	Scurrulinae	Scurrula	genomic DNA	Nucleolus	1489	25S
Scurrula pulverulenta	EU544452	Nickrent 4159	Scurrula pulverulenta voucher Nickrent 4159 maturase K (matK) gene, partial cds; chloroplast.	Vidal-Russell,R. and Nickrent,D.L.	Am. J. Bot. 95 (8), 1015-1029 (2008)	Lorantheae	Scurrulinae	Scurrula	genomic DNA	Chloroplast	1335	matK
Scurrula sootepensis	AY191139	UNKNOWN	Scurrula sootepensis tRNA-Leu (trnL) gene, partial sequence; chloroplast gene for chloroplast product.	Han,R.L., Hao,G. and Zhang,D.X.	Unpublished	Lorantheae	Scurrulinae	Scurrula	genomic DNA	Chloroplast	309	trnL/LF
Scurrula sp.	JQ933474	M.F. Watson et al., 20812115, (E)	Scurrula sp. CHSL-2012 ribulose-1,5-bisphosphate carboxylase/oxygenase large subunit (rbcL) gene, partial cds; plastid.	Saslis-Lagoudakis,C.H., Savolainen,V., Williamson,E.M., Forest,F.,	Proc. Natl. Acad. Sci. U.S.A. 109 (39), 15835-15840 (2012)	Lorantheae	Scurrulinae	Scurrula	genomic DNA	Chloroplast	672	rbcL
Scurrula sp.	AY191146	Han 02-C10	Scurrula sp. Han 02-C10 tRNA-Leu (trnL) gene, partial sequence; chloroplast gene for chloroplast product.	Han,R.L., Hao,G. and Zhang,D.X.	Unpublished	Lorantheae	Scurrulinae	Scurrula	genomic DNA	Chloroplast	354	trnL/LF
Septulina glauca	AM235022	Manning J.C. 2925 (NBG)	Septulina glauca chloroplast partial rbcL gene for ribulose bisphosphate carboxylase large subunit, specimen voucher Manning J.C. 2925 (NBG).	Forest,F., Grenyer,R., Rouget,M., Davies,T.J., Cowling,R.M.,	Nature 445 (7129), 757-760 (2007)	Lorantheae	Tapinanthinae	Septulina	genomic DNA	Chloroplast	1399	rbcL
Septulina glauca	EU544346	Nickrent 4089	Septulina glauca voucher Nickrent 4089 small subunit ribosomal RNA gene, partial sequence.	Vidal-Russell,R. and Nickrent,D.L.	Am. J. Bot. 95 (8), 1015-1029 (2008)	Lorantheae	Tapinanthinae	Septulina	genomic DNA	Nucleolus	1778	18S
Septulina glauca	EU544398	Nickrent 4089	Septulina glauca voucher Nickrent 4089 26S ribosomal RNA gene, partial sequence.	Vidal-Russell,R. and Nickrent,D.L.	Am. J. Bot. 95 (8), 1015-1029 (2008)	Lorantheae	Tapinanthinae	Septulina	genomic DNA	Nucleolus	2081	25S
Septulina glauca	EU544506	Nickrent 4089	Septulina glauca voucher Nickrent 4089 tRNA-Leu (trnL) gene, partial sequence; trnL-trnF intergenic spacer, complete sequence; and tRNA-Phe (trnF) gene, partial sequence; chloroplast.	Vidal-Russell,R. and Nickrent,D.L.	Am. J. Bot. 95 (8), 1015-1029 (2008)	Lorantheae	Tapinanthinae	Septulina	genomic DNA	Chloroplast	620	trnL/LF
Socratina bemarivensis	EU544347	Nickrent 4179	Socratina bemarivensis voucher Nickrent 4179 small subunit ribosomal RNA gene, partial sequence.	Vidal-Russell,R. and Nickrent,D.L.	Am. J. Bot. 95 (8), 1015-1029 (2008)	Lorantheae	Tapinanthinae	Socratina	genomic DNA	Nucleolus	1669	18S
Socratina bemarivensis	EU544399	Nickrent 4179	Socratina bemarivensis voucher Nickrent 4179 26S ribosomal RNA gene, partial sequence.	Vidal-Russell,R. and Nickrent,D.L.	Am. J. Bot. 95 (8), 1015-1029 (2008)	Lorantheae	Tapinanthinae	Socratina	genomic DNA	Nucleolus	1747	25S
Socratina bemarivensis	EU544454	Nickrent 4279	Socratina bemarivensis voucher Nickrent 4279 maturase K (matK) gene, partial cds; chloroplast.	Vidal-Russell,R. and Nickrent,D.L.	Am. J. Bot. 95 (8), 1015-1029 (2008)	Lorantheae	Tapinanthinae	Socratina	genomic DNA	Chloroplast	1344	matK
Socratina bemarivensis	EU544507	Nickrent 4179	Socratina bemarivensis voucher Nickrent 4179 tRNA-Leu (trnL) gene and trnL-trnF intergenic spacer, partial sequence; chloroplast.	Vidal-Russell,R. and Nickrent,D.L.	Am. J. Bot. 95 (8), 1015-1029 (2008)	Lorantheae	Tapinanthinae	Socratina	genomic DNA	Chloroplast	572	trnL/LF
Sogerianthe sessiflora	EU544348	Nickrent 4467	Sogerianthe sessiflora voucher Nickrent 4467 small subunit ribosomal RNA gene, partial sequence.	Vidal-Russell,R. and Nickrent,D.L.	Am. J. Bot. 95 (8), 1015-1029 (2008)	Lorantheae	Amyeminae	Sogerianthe	genomic DNA	Nucleolus	1700	18S
Sogerianthe sessiflora	EU544400	Nickrent 4467	Sogerianthe sessiflora voucher Nickrent 4467 26S ribosomal RNA gene, partial sequence.	Vidal-Russell,R. and Nickrent,D.L.	Am. J. Bot. 95 (8), 1015-1029 (2008)	Lorantheae	Amyeminae	Sogerianthe	genomic DNA	Nucleolus	2099	25S
Sogerianthe sessiflora	EU544455	Nickrent 4467	Sogerianthe sessiflora voucher Nickrent 4467 maturase K (matK) gene, partial cds; chloroplast.	Vidal-Russell,R. and Nickrent,D.L.	Am. J. Bot. 95 (8), 1015-1029 (2008)	Lorantheae	Amyeminae	Sogerianthe	genomic DNA	Chloroplast	1367	matK
Sogerianthe sessiflora	EU544508	Nickrent 4467	Sogerianthe sessiflora voucher Nickrent 4467 tRNA-Leu (trnL) gene, partial sequence; trnL-trnF intergenic spacer, complete sequence; and tRNA-Phe (trnF) gene, partial sequence; chloroplast.	Vidal-Russell,R. and Nickrent,D.L.	Am. J. Bot. 95 (8), 1015-1029 (2008)	Lorantheae	Amyeminae	Sogerianthe	genomic DNA	Chloroplast	587	trnL/LF
Spragueanella rhamnifolia	EU544401	Nickrent 4674	Spragueanella rhamnifolia voucher Nickrent 4674 26S ribosomal RNA gene, partial sequence.	Vidal-Russell,R. and Nickrent,D.L.	Am. J. Bot. 95 (8), 1015-1029 (2008)	Lorantheae	Emelianthinae	Spragueanella	genomic DNA	Nucleolus	1381	25S
Spragueanella rhamnifolia	EU544456	Nickrent 4674	Spragueanella rhamnifolia voucher Nickrent 4674 maturase K-like (matK) gene, partial sequence; chloroplast.	Vidal-Russell,R. and Nickrent,D.L.	Am. J. Bot. 95 (8), 1015-1029 (2008)	Lorantheae	Emelianthinae	Spragueanella	genomic DNA	Chloroplast	1390	matK
Struthanthus oerstedii	L24421	UNKNOWN	Struthanthus oerstedii (Oliv.) Standl. and Calderon 18S ribosomal RNA gene, partial sequence.	Nickrent,D.L. and Duff,R.J.	(in) Moreno,M.T., Cubero,J.I., Berner,D., Joel,D., Musselman,L.J.	Psittacantheae	Psittacanthinae	Struthanthus	genomic DNA	Nucleolus	1735	18S
Struthanthus oerstedii	EU544402	Nickrent 2728	Struthanthus oerstedii voucher Nickrent 2728 26S ribosomal RNA gene, partial sequence.	Vidal-Russell,R. and Nickrent,D.L.	Am. J. Bot. 95 (8), 1015-1029 (2008)	Psittacantheae	Psittacanthinae	Struthanthus	genomic DNA	Nucleolus	2096	25S
Struthanthus oerstedii	EU544457	Nickrent 2728	Struthanthus oerstedii voucher Nickrent 2728 maturase K (matK) gene, partial cds; chloroplast.	Vidal-Russell,R. and Nickrent,D.L.	Am. J. Bot. 95 (8), 1015-1029 (2008)	Psittacantheae	Psittacanthinae	Struthanthus	genomic DNA	Chloroplast	1337	matK
Struthanthus oerstedii	EU544509	Nickrent 2728	Struthanthus oerstedii voucher Nickrent 2728 tRNA-Leu (trnL) gene, partial sequence; trnL-trnF intergenic spacer, complete sequence; and tRNA-Phe (trnF) gene, partial sequence; chloroplast.	Vidal-Russell,R. and Nickrent,D.L.	Am. J. Bot. 95 (8), 1015-1029 (2008)	Psittacantheae	Psittacanthinae	Struthanthus	genomic DNA	Chloroplast	677	trnL/LF
Struthanthus orbicularis	DQ333856	Calvin and Wilson CR01-02	Struthanthus orbicularis internal transcribed spacer 1, partial sequence; 5.8S ribosomal RNA gene, complete sequence; and internal transcribed spacer 2, partial sequence.	Wilson,C.A. and Calvin,C.L.	Am. J. Bot. 93 (5), 787-796 (2006)	Psittacantheae	Psittacanthinae	Struthanthus	genomic DNA	Nucleolus	667	ITS1; 5.8S; ITS2
Struthanthus orbicularis	DQ340607	Calvin and Wilson CR01-02	Struthanthus orbicularis tRNA-Leu (trnL) gene and trnL-trnF intergenic spacer, partial sequence; chloroplast.	Wilson,C.A. and Calvin,C.L.	Am. J. Bot. 93 (5), 787-796 (2006)	Psittacantheae	Psittacanthinae	Struthanthus	genomic DNA	Chloroplast	643	trnL/LF
Struthanthus orbicularis	JQ589640	RE-5125-1	Struthanthus orbicularis voucher RE-5125-1 maturase K (matK) gene, partial cds; chloroplast.	International Barcode of Life (iBOL)	Unpublished	Psittacantheae	Psittacanthinae	Struthanthus	genomic DNA	Chloroplast	653	matK
Struthanthus orbicularis	JQ592413	BioBot05045	Struthanthus orbicularis voucher BioBot05045 ribulose-1,5-bisphosphate carboxylase/oxygenase large subunit (rbcL) gene, partial cds; chloroplast.	International Barcode of Life (iBOL)	Unpublished	Psittacantheae	Psittacanthinae	Struthanthus	genomic DNA	Chloroplast	552	rbcL
Struthanthus orbicularis	JQ592414	BioBot05046	Struthanthus orbicularis voucher BioBot05046 ribulose-1,5-bisphosphate carboxylase/oxygenase large subunit (rbcL) gene, partial cds; chloroplast.	International Barcode of Life (iBOL)	Unpublished	Psittacantheae	Psittacanthinae	Struthanthus	genomic DNA	Chloroplast	552	rbcL
Struthanthus orbicularis	JQ592415	BioBot05048	Struthanthus orbicularis voucher BioBot05048 ribulose-1,5-bisphosphate carboxylase/oxygenase large subunit (rbcL) gene, partial cds; chloroplast.	International Barcode of Life (iBOL)	Unpublished	Psittacantheae	Psittacanthinae	Struthanthus	genomic DNA	Chloroplast	552	rbcL
Struthanthus orbicularis	JQ594621	RE-5125-1	Struthanthus orbicularis voucher RE-5125-1 ribulose-1,5-bisphosphate carboxylase/oxygenase large subunit (rbcL) gene, partial cds; chloroplast.	International Barcode of Life (iBOL)	Unpublished	Psittacantheae	Psittacanthinae	Struthanthus	genomic DNA	Chloroplast	553	rbcL
Struthanthus sp.	JQ589641	RE-5128-1	Struthanthus sp. MHPAA293-08 voucher RE-5128-1 maturase K (matK) gene, partial cds; chloroplast.	International Barcode of Life (iBOL)	Unpublished	Psittacantheae	Psittacanthinae	Struthanthus	genomic DNA	Chloroplast	643	matK
Struthanthus sp.	JQ594622	RE-5128-1	Struthanthus sp. MHPAA293-08 voucher RE-5128-1 ribulose-1,5-bisphosphate carboxylase/oxygenase large subunit (rbcL) gene, partial cds; chloroplast.	International Barcode of Life (iBOL)	Unpublished	Psittacantheae	Psittacanthinae	Struthanthus	genomic DNA	Chloroplast	563	rbcL
Struthanthus woodsonii	EU544349	Nickrent 2761	Struthanthus woodsonii voucher Nickrent 2761 small subunit ribosomal RNA gene, partial sequence.	Vidal-Russell,R. and Nickrent,D.L.	Am. J. Bot. 95 (8), 1015-1029 (2008)	Psittacantheae	Psittacanthinae	Struthanthus	genomic DNA	Nucleolus	1696	18S
Struthanthus woodsonii	EU544403	Nickrent 2761	Struthanthus woodsonii voucher Nickrent 2761 26S ribosomal RNA gene, partial sequence.	Vidal-Russell,R. and Nickrent,D.L.	Am. J. Bot. 95 (8), 1015-1029 (2008)	Psittacantheae	Psittacanthinae	Struthanthus	genomic DNA	Nucleolus	2036	25S
Struthanthus woodsonii	EU544458	Nickrent 2761	Struthanthus woodsonii voucher Nickrent 2761 maturase K (matK) gene, partial cds; chloroplast.	Vidal-Russell,R. and Nickrent,D.L.	Am. J. Bot. 95 (8), 1015-1029 (2008)	Psittacantheae	Psittacanthinae	Struthanthus	genomic DNA	Chloroplast	1134	matK
Struthanthus woodsonii	EU544474	Nickrent 2761	Struthanthus woodsonii voucher Nickrent 2761 ribulose-1,5-bisphosphate carboxylase/oxygenase large subunit (rbcL) gene, partial cds; chloroplast.	Vidal-Russell,R. and Nickrent,D.L.	Unpublished	Psittacantheae	Psittacanthinae	Struthanthus	genomic DNA	Chloroplast	837	rbcL
Struthanthus woodsonii	EU544510	Nickrent 2761	Struthanthus woodsonii voucher Nickrent 2761 tRNA-Leu (trnL) gene, partial sequence; trnL-trnF intergenic spacer, complete sequence; and tRNA-Phe (trnF) gene, partial sequence; chloroplast.	Vidal-Russell,R. and Nickrent,D.L.	Am. J. Bot. 95 (8), 1015-1029 (2008)	Psittacantheae	Psittacanthinae	Struthanthus	genomic DNA	Chloroplast	586	trnL/LF
Tapinanthus constrictiflorus	EU544404	Nickrent 3088	Tapinanthus constrictiflorus voucher Nickrent 3088 26S ribosomal RNA gene, partial sequence.	Vidal-Russell,R. and Nickrent,D.L.	Am. J. Bot. 95 (8), 1015-1029 (2008)	Lorantheae	Tapinanthinae	Tapinanthus	genomic DNA	Nucleolus	2034	25S
Tapinanthus constrictiflorus	EU544459	Nickrent 3088	Tapinanthus constrictiflorus voucher Nickrent 3088 maturase K (matK) gene, partial cds; chloroplast.	Vidal-Russell,R. and Nickrent,D.L.	Am. J. Bot. 95 (8), 1015-1029 (2008)	Lorantheae	Tapinanthinae	Tapinanthus	genomic DNA	Chloroplast	1424	matK
Tapinanthus constrictiflorus	EU544511	Nickrent 3088	Tapinanthus constrictiflorus voucher Nickrent 3088 tRNA-Leu (trnL) gene, partial sequence; trnL-trnF intergenic spacer, complete sequence; and tRNA-Phe (trnF) gene, partial sequence; chloroplast.	Vidal-Russell,R. and Nickrent,D.L.	Am. J. Bot. 95 (8), 1015-1029 (2008)	Lorantheae	Tapinanthinae	Tapinanthus	genomic DNA	Chloroplast	627	trnL/LF
Tapinanthus quinquangulus	L24422	UNKNOWN	Tapinanthus quinquangulus (Engl. and Schinz) Danser 18S ribosomal RNA gene, partial sequence.	Nickrent,D.L. and Duff,R.J.	(in) Moreno,M.T., Cubero,J.I., Berner,D., Joel,D., Musselman,L.J.	Lorantheae	Tapinanthinae	Tapinanthus	genomic DNA	Nucleolus	1751	18S
Tapinanthus sp.	EU254407	OM825	Tapinanthus sp. OM 825 NADH dehydrogenase subunit J (ndhJ) gene, partial cds; chloroplast.	Lahaye,R., van der Bank,M., Bogarin,D., Warner,J., Pupulin,F.,	Proc. Natl. Acad. Sci. U.S.A. 105 (8), 2923-2928 (2008)	Lorantheae	Tapinanthinae	Tapinanthus	genomic DNA	Chloroplast	339	ndhJ
Tapinanthus sp.	EU214301	OM825	Tapinanthus sp. OM 825 maturase K-like (matK) gene, partial sequence; chloroplast.	Lahaye,R., van der Bank,M., Bogarin,D., Warner,J., Pupulin,F.,	Proc. Natl. Acad. Sci. U.S.A. 105 (8), 2923-2928 (2008)	Lorantheae	Tapinanthinae	Tapinanthus	genomic DNA	Chloroplast	675	matK
Tapinanthus sp.	EU214131	OM825	Tapinanthus sp. OM 825 Ycf5-like (Ycf5) gene, partial sequence; chloroplast.	Lahaye,R., van der Bank,M., Bogarin,D., Warner,J., Pupulin,F.,	Proc. Natl. Acad. Sci. U.S.A. 105 (8), 2923-2928 (2008)	Lorantheae	Tapinanthinae	Tapinanthus	genomic DNA	Chloroplast	212	ycf5
Tapinanthus sp.	EU214037	OM825	Tapinanthus sp. OM 825 RNA polymerase C (rpoC1) gene, partial cds; chloroplast.	Lahaye,R., van der Bank,M., Bogarin,D., Warner,J., Pupulin,F.,	Proc. Natl. Acad. Sci. U.S.A. 105 (8), 2923-2928 (2008)	Lorantheae	Tapinanthinae	Tapinanthus	genomic DNA	Chloroplast	481	rpoC1
Tapinanthus sp.	EU213700	OM825	Tapinanthus sp. OM 825 RNA polymerase beta subunit (rpoB) gene, partial cds.	Lahaye,R., van der Bank,M., Bogarin,D., Warner,J., Pupulin,F.,	Proc. Natl. Acad. Sci. U.S.A. 105 (8), 2923-2928 (2008)	Lorantheae	Tapinanthinae	Tapinanthus	genomic DNA	Nucleolus	354	rpoB
Tapinanthus sp.	EU213529	OM825	Tapinanthus sp. OM 825 ribulose-1,5-bisphosphate carboxylase/oxygenase large subunit (rbcL) gene, partial cds; chloroplast.	Lahaye,R., van der Bank,M., Bogarin,D., Warner,J., Pupulin,F.,	Proc. Natl. Acad. Sci. U.S.A. 105 (8), 2923-2928 (2008)	Lorantheae	Tapinanthinae	Tapinanthus	genomic DNA	Chloroplast	689	rbcL
Tapinanthus sp.	EU213431	OM825	Tapinanthus sp. OM 825 acetyl-CoA carboxylase-D (accD) gene, partial cds; chloroplast.	Lahaye,R., van der Bank,M., Bogarin,D., Warner,J., Pupulin,F.,	Proc. Natl. Acad. Sci. U.S.A. 105 (8), 2923-2928 (2008)	Lorantheae	Tapinanthinae	Tapinanthus	genomic DNA	Chloroplast	189	accD
Tapinanthus sp.	EU626984	OM825	Tapinanthus sp. OM 825 psbK-psbI intergenic spacer, partial sequence.	Lahaye,R., Savolainen,V., Duthoit,S., Maurin,O. and van der Bank,M.	Unpublished	Lorantheae	Tapinanthinae	Tapinanthus	genomic DNA	Nucleolus	342	psbK-psbI
Tapinanthus sp.	EU626885	OM825	Tapinanthus sp. OM 825 atpF-atpH intergenic spacer, partial sequence; chloroplast.	Lahaye,R., Savolainen,V., Duthoit,S., Maurin,O. and van der Bank,M.	Unpublished	Lorantheae	Tapinanthinae	Tapinanthus	genomic DNA	Chloroplast	504	atpF-atpH
Tapinanthus sp.	DQ110160	Smith 1850 US	Tapinanthus sp. Smith 1850 F1-ATPase alpha subunit (atp1) gene, partial cds; mitochondrial.	Davis,C.C., Anderson,W.R. and Wurdack,K.J.	Proc. Biol. Sci. 272 (1578), 2237-2242 (2005)	Lorantheae	Tapinanthinae	Tapinanthus	genomic DNA	Mitochondrion	998	atp1
Tapinanthus sp.	DQ110290	Smith 1850, US	Tapinanthus sp. Smith 1850 NADH dehydrogenase subunit 1 (NADH1) gene, partial sequence; mitochondrial.	Davis,C.C., Anderson,W.R. and Wurdack,K.J.	Proc. Biol. Sci. 272 (1578), 2237-2242 (2005)	Lorantheae	Tapinanthinae	Tapinanthus	genomic DNA	Mitochondrion	1664	nad1
Tapinanthus sp.	DQ110361	Smith 1850 US	Tapinanthus sp. Smith 1850 maturase (matR) gene, partial cds; mitochondrial.	Davis,C.C., Anderson,W.R. and Wurdack,K.J.	Proc. Biol. Sci. 272 (1578), 2237-2242 (2005)	Lorantheae	Tapinanthinae	Tapinanthus	genomic DNA	Mitochondrion	1786	matR
Taxillus chinensis	AY191143	UNKNOWN	Taxillus chinensis tRNA-Leu (trnL) gene, partial sequence; chloroplast gene for chloroplast product.	Han,R.L., Hao,G. and Zhang,D.X.	Unpublished	Lorantheae	Scurrulinae	Taxillus	genomic DNA	Chloroplast	309	trnL/LF
Taxillus chinensis	EU544350	Nickrent 4032	Taxillus chinensis voucher Nickrent 4032 small subunit ribosomal RNA gene, partial sequence.	Vidal-Russell,R. and Nickrent,D.L.	Am. J. Bot. 95 (8), 1015-1029 (2008)	Lorantheae	Scurrulinae	Taxillus	genomic DNA	Nucleolus	1780	18S
Taxillus chinensis	EU544405	Nickrent 4032	Taxillus chinensis voucher Nickrent 4032 26S ribosomal RNA gene, partial sequence.	Vidal-Russell,R. and Nickrent,D.L.	Am. J. Bot. 95 (8), 1015-1029 (2008)	Lorantheae	Scurrulinae	Taxillus	genomic DNA	Nucleolus	1967	25S
Taxillus chinensis	EU544460	Nickrent 4032	Taxillus chinensis voucher Nickrent 4032 maturase K (matK) gene, partial cds; chloroplast.	Vidal-Russell,R. and Nickrent,D.L.	Am. J. Bot. 95 (8), 1015-1029 (2008)	Lorantheae	Scurrulinae	Taxillus	genomic DNA	Chloroplast	1374	matK
Taxillus chinensis	EU544512	Nickrent 4032	Taxillus chinensis voucher Nickrent 4032 tRNA-Leu (trnL) gene, partial sequence; trnL-trnF intergenic spacer, complete sequence; and tRNA-Phe (trnF) gene, partial sequence; chloroplast.	Vidal-Russell,R. and Nickrent,D.L.	Am. J. Bot. 95 (8), 1015-1029 (2008)	Lorantheae	Scurrulinae	Taxillus	genomic DNA	Chloroplast	579	trnL/LF
Taxillus chinensis	GQ435467	PS1685MT01	Taxillus chinensis voucher PS1685MT01 psbA-trnH intergenic spacer, complete sequence; chloroplast.	Chen,S., Yao,H., Han,J., Liu,C., Song,J., Shi,L., Zhu,Y., Ma,X.,	PLoS ONE 5 (1), E8613 (2010)	Lorantheae	Scurrulinae	Taxillus	genomic DNA	Chloroplast	201	trnH-psbA
Taxillus chinensis	GQ435851	PS1685MT01	Taxillus chinensis voucher PS1685MT01 Ycf5 (ycf5) gene, partial cds; chloroplast.	Chen,S., Yao,H., Han,J., Liu,C., Song,J., Shi,L., Zhu,Y., Ma,X.,	PLoS ONE 5 (1), E8613 (2010)	Lorantheae	Scurrulinae	Taxillus	genomic DNA	Chloroplast	376	ycf5
Taxillus chinensis	HQ317780	LS03	Taxillus chinensis voucher LS03 ribulose-1,5-bisphosphate carboxylase/oxygenase large subunit (rbcL) gene, partial cds; chloroplast.	Li,Y.-H., Chen,S.-L., Yao,H. and Luo,K.	Unpublished	Lorantheae	Scurrulinae	Taxillus	genomic DNA	Chloroplast	703	rbcL
Taxillus chinensis	HQ317781	LS04	Taxillus chinensis voucher LS04 ribulose-1,5-bisphosphate carboxylase/oxygenase large subunit (rbcL) gene, partial cds; chloroplast.	Li,Y.-H., Chen,S.-L., Yao,H. and Luo,K.	Unpublished	Lorantheae	Scurrulinae	Taxillus	genomic DNA	Chloroplast	703	rbcL
Taxillus chinensis	HQ317782	LS06	Taxillus chinensis voucher LS06 ribulose-1,5-bisphosphate carboxylase/oxygenase large subunit (rbcL) gene, partial cds; chloroplast.	Li,Y.-H., Chen,S.-L., Yao,H. and Luo,K.	Unpublished	Lorantheae	Scurrulinae	Taxillus	genomic DNA	Chloroplast	703	rbcL
Taxillus chinensis	HQ317783	LS07	Taxillus chinensis voucher LS07 ribulose-1,5-bisphosphate carboxylase/oxygenase large subunit (rbcL) gene, partial cds; chloroplast.	Li,Y.-H., Chen,S.-L., Yao,H. and Luo,K.	Unpublished	Lorantheae	Scurrulinae	Taxillus	genomic DNA	Chloroplast	703	rbcL
Taxillus chinensis	HQ317784	LS08	Taxillus chinensis voucher LS08 ribulose-1,5-bisphosphate carboxylase/oxygenase large subunit (rbcL) gene, partial cds; chloroplast.	Li,Y.-H., Chen,S.-L., Yao,H. and Luo,K.	Unpublished	Lorantheae	Scurrulinae	Taxillus	genomic DNA	Chloroplast	703	rbcL
Taxillus chinensis	HQ317785	LS09	Taxillus chinensis voucher LS09 ribulose-1,5-bisphosphate carboxylase/oxygenase large subunit (rbcL) gene, partial cds; chloroplast.	Li,Y.-H., Chen,S.-L., Yao,H. and Luo,K.	Unpublished	Lorantheae	Scurrulinae	Taxillus	genomic DNA	Chloroplast	703	rbcL
Taxillus chinensis	HQ317786	LS52	Taxillus chinensis voucher LS52 ribulose-1,5-bisphosphate carboxylase/oxygenase large subunit (rbcL) gene, partial cds; chloroplast.	Li,Y.-H., Chen,S.-L., Yao,H. and Luo,K.	Unpublished	Lorantheae	Scurrulinae	Taxillus	genomic DNA	Chloroplast	703	rbcL
Taxillus chinensis	HQ317787	LS53	Taxillus chinensis voucher LS53 ribulose-1,5-bisphosphate carboxylase/oxygenase large subunit (rbcL) gene, partial cds; chloroplast.	Li,Y.-H., Chen,S.-L., Yao,H. and Luo,K.	Unpublished	Lorantheae	Scurrulinae	Taxillus	genomic DNA	Chloroplast	703	rbcL
Taxillus chinensis	HQ317788	LS54	Taxillus chinensis voucher LS54 ribulose-1,5-bisphosphate carboxylase/oxygenase large subunit (rbcL) gene, partial cds; chloroplast.	Li,Y.-H., Chen,S.-L., Yao,H. and Luo,K.	Unpublished	Lorantheae	Scurrulinae	Taxillus	genomic DNA	Chloroplast	703	rbcL
Taxillus chinensis	HQ317789	LS55	Taxillus chinensis voucher LS55 ribulose-1,5-bisphosphate carboxylase/oxygenase large subunit (rbcL) gene, partial cds; chloroplast.	Li,Y.-H., Chen,S.-L., Yao,H. and Luo,K.	Unpublished	Lorantheae	Scurrulinae	Taxillus	genomic DNA	Chloroplast	703	rbcL
Taxillus chinensis	HQ317790	LS56	Taxillus chinensis voucher LS56 ribulose-1,5-bisphosphate carboxylase/oxygenase large subunit (rbcL) gene, partial cds; chloroplast.	Li,Y.-H., Chen,S.-L., Yao,H. and Luo,K.	Unpublished	Lorantheae	Scurrulinae	Taxillus	genomic DNA	Chloroplast	703	rbcL
Taxillus chinensis	HQ317821	LS03	Taxillus chinensis voucher LS03 PsbA (psbA) gene, partial cds; psbA-trnH intergenic spacer, complete sequence; and tRNA-His (trnH) gene, partial sequence; chloroplast.	Li,Y.-H., Chen,S.-L., Yao,H. and Luo,K.	Unpublished	Lorantheae	Scurrulinae	Taxillus	genomic DNA	Chloroplast	238	trnH-psbA
Taxillus chinensis	HQ317822	LS04	Taxillus chinensis voucher LS04 PsbA (psbA) gene, partial cds; psbA-trnH intergenic spacer, complete sequence; and tRNA-His (trnH) gene, partial sequence; chloroplast.	Li,Y.-H., Chen,S.-L., Yao,H. and Luo,K.	Unpublished	Lorantheae	Scurrulinae	Taxillus	genomic DNA	Chloroplast	238	trnH-psbA
Taxillus chinensis	HQ317823	LS06	Taxillus chinensis voucher LS06 PsbA (psbA) gene, partial cds; psbA-trnH intergenic spacer, complete sequence; and tRNA-His (trnH) gene, partial sequence; chloroplast.	Li,Y.-H., Chen,S.-L., Yao,H. and Luo,K.	Unpublished	Lorantheae	Scurrulinae	Taxillus	genomic DNA	Chloroplast	238	trnH-psbA
Taxillus chinensis	HQ317824	LS07	Taxillus chinensis voucher LS07 PsbA (psbA) gene, partial cds; psbA-trnH intergenic spacer, complete sequence; and tRNA-His (trnH) gene, partial sequence; chloroplast.	Li,Y.-H., Chen,S.-L., Yao,H. and Luo,K.	Unpublished	Lorantheae	Scurrulinae	Taxillus	genomic DNA	Chloroplast	238	trnH-psbA
Taxillus chinensis	HQ317825	LS08	Taxillus chinensis voucher LS08 PsbA (psbA) gene, partial cds; psbA-trnH intergenic spacer, complete sequence; and tRNA-His (trnH) gene, partial sequence; chloroplast.	Li,Y.-H., Chen,S.-L., Yao,H. and Luo,K.	Unpublished	Lorantheae	Scurrulinae	Taxillus	genomic DNA	Chloroplast	238	trnH-psbA
Taxillus chinensis	HQ317826	LS09	Taxillus chinensis voucher LS09 PsbA (psbA) gene, partial cds; psbA-trnH intergenic spacer, complete sequence; and tRNA-His (trnH) gene, partial sequence; chloroplast.	Li,Y.-H., Chen,S.-L., Yao,H. and Luo,K.	Unpublished	Lorantheae	Scurrulinae	Taxillus	genomic DNA	Chloroplast	238	trnH-psbA
Taxillus chinensis	HQ317827	LS52	Taxillus chinensis voucher LS52 PsbA (psbA) gene, partial cds; psbA-trnH intergenic spacer, complete sequence; and tRNA-His (trnH) gene, partial sequence; chloroplast.	Li,Y.-H., Chen,S.-L., Yao,H. and Luo,K.	Unpublished	Lorantheae	Scurrulinae	Taxillus	genomic DNA	Chloroplast	238	trnH-psbA
Taxillus chinensis	HQ317828	LS53	Taxillus chinensis voucher LS53 PsbA (psbA) gene, partial cds; psbA-trnH intergenic spacer, complete sequence; and tRNA-His (trnH) gene, partial sequence; chloroplast.	Li,Y.-H., Chen,S.-L., Yao,H. and Luo,K.	Unpublished	Lorantheae	Scurrulinae	Taxillus	genomic DNA	Chloroplast	238	trnH-psbA
Taxillus chinensis	HQ317829	LS54	Taxillus chinensis voucher LS54 PsbA (psbA) gene, partial cds; psbA-trnH intergenic spacer, complete sequence; and tRNA-His (trnH) gene, partial sequence; chloroplast.	Li,Y.-H., Chen,S.-L., Yao,H. and Luo,K.	Unpublished	Lorantheae	Scurrulinae	Taxillus	genomic DNA	Chloroplast	218	trnH-psbA
Taxillus chinensis	HQ317830	LS55	Taxillus chinensis voucher LS55 PsbA (psbA) gene, partial cds; psbA-trnH intergenic spacer, complete sequence; and tRNA-His (trnH) gene, partial sequence; chloroplast.	Li,Y.-H., Chen,S.-L., Yao,H. and Luo,K.	Unpublished	Lorantheae	Scurrulinae	Taxillus	genomic DNA	Chloroplast	231	trnH-psbA
Taxillus chinensis	HQ317831	LS56	Taxillus chinensis voucher LS56 PsbA (psbA) gene, partial cds; psbA-trnH intergenic spacer, complete sequence; and tRNA-His (trnH) gene, partial sequence; chloroplast.	Li,Y.-H., Chen,S.-L., Yao,H. and Luo,K.	Unpublished	Lorantheae	Scurrulinae	Taxillus	genomic DNA	Chloroplast	238	trnH-psbA
Taxillus chinensis	JN687576	A. Chveerach_P4	Taxillus chinensis psbA-trnH intergenic spacer, partial sequence; chloroplast.	Kwanda,N., Noikotr,K., Sudmoon,R., Tanee,T. and Chaveerach,A.	J Nat Med (2012) In press	Lorantheae	Scurrulinae	Taxillus	genomic DNA	Chloroplast	230	trnH-psbA
Taxillus chinensis	JN687568	A. Chveerach_P4	Taxillus chinensis ribulose-1,5-bisphosphate carboxylase/oxygenase large subunit (rbcL) gene, partial cds; chloroplast.	Kwanda,N., Noikotr,K., Sudmoon,R., Tanee,T. and Chaveerach,A.	J Nat Med (2012) In press	Lorantheae	Scurrulinae	Taxillus	genomic DNA	Chloroplast	512	rbcL
Taxillus chinensis	JF949992	P6909	Taxillus chinensis voucher P6909 ribulose-1,5-bisphosphate carboxylase/oxygenase large subunit (rbcL) gene, partial cds; chloroplast.	Herrmann,F., Romero,M.R., Blazquez,A.G., Kaufmann,D., Ashour,M.L.,	Diversity (Basel) 3, 547-580 (2011)	Lorantheae	Scurrulinae	Taxillus	genomic DNA	Chloroplast	679	rbcL
Taxillus chinensis	JX177497	UNKNOWN	Taxillus chinensis 18S ribosomal RNA gene, partial sequence; internal transcribed spacer 1, 5.8S ribosomal RNA gene, and internal transcribed spacer 2, complete sequence; and 28S ribosomal RNA gene, partial sequence.	Lee,I.-J.	Submitted (14-JUN-2012) Herbarium, National Research Institute of	Lorantheae	Scurrulinae	Taxillus	genomic DNA	Nucleolus	748	ITS1; 5.8S; ITS2
Taxillus chinensis	KF447377	A. Chveerach 866	Taxillus chinensis voucher A. Chveerach 866 PsbA (psbA) gene, partial cds; psbA-trnH intergenic spacer, complete sequence; and tRNA-His (trnH) gene, partial sequence; chloroplast.	Chaveerach,A., Sudmoon,R., Noikotr,K., Kwanda,N. and Tanee,T.	Unpublished	Lorantheae	Scurrulinae	Taxillus	genomic DNA	Chloroplast	263	trnH-psbA
Taxillus chinensis	KF447376	A. Chveerach 866	Taxillus chinensis voucher A. Chveerach 866 ribulose-1,5-bisphosphate carboxylase/oxygenase large subunit (rbcL) gene, partial cds; chloroplast.	Chaveerach,A., Sudmoon,R., Noikotr,K., Kwanda,N. and Tanee,T.	Unpublished	Lorantheae	Scurrulinae	Taxillus	genomic DNA	Chloroplast	447	rbcL
Taxillus limprichtii	HQ317791	LS12	Taxillus limprichtii voucher LS12 ribulose-1,5-bisphosphate carboxylase/oxygenase large subunit (rbcL) gene, partial cds; chloroplast.	Li,Y.-H., Chen,S.-L., Yao,H. and Luo,K.	Unpublished	Lorantheae	Scurrulinae	Taxillus	genomic DNA	Chloroplast	703	rbcL
Taxillus limprichtii	HQ317792	LS13	Taxillus limprichtii voucher LS13 ribulose-1,5-bisphosphate carboxylase/oxygenase large subunit (rbcL) gene, partial cds; chloroplast.	Li,Y.-H., Chen,S.-L., Yao,H. and Luo,K.	Unpublished	Lorantheae	Scurrulinae	Taxillus	genomic DNA	Chloroplast	703	rbcL
Taxillus limprichtii	HQ317793	LS15	Taxillus limprichtii voucher LS15 ribulose-1,5-bisphosphate carboxylase/oxygenase large subunit (rbcL) gene, partial cds; chloroplast.	Li,Y.-H., Chen,S.-L., Yao,H. and Luo,K.	Unpublished	Lorantheae	Scurrulinae	Taxillus	genomic DNA	Chloroplast	703	rbcL
Taxillus limprichtii	HQ317832	LS12	Taxillus limprichtii voucher LS12 PsbA (psbA) gene, partial cds; psbA-trnH intergenic spacer, complete sequence; and tRNA-His (trnH) gene, partial sequence; chloroplast.	Li,Y.-H., Chen,S.-L., Yao,H. and Luo,K.	Unpublished	Lorantheae	Scurrulinae	Taxillus	genomic DNA	Chloroplast	272	trnH-psbA
Taxillus limprichtii	HQ317833	LS13	Taxillus limprichtii voucher LS13 PsbA (psbA) gene, partial cds; psbA-trnH intergenic spacer, complete sequence; and tRNA-His (trnH) gene, partial sequence; chloroplast.	Li,Y.-H., Chen,S.-L., Yao,H. and Luo,K.	Unpublished	Lorantheae	Scurrulinae	Taxillus	genomic DNA	Chloroplast	272	trnH-psbA
Taxillus limprichtii	HQ317834	LS15	Taxillus limprichtii voucher LS15 PsbA (psbA) gene, partial cds; psbA-trnH intergenic spacer, complete sequence; and tRNA-His (trnH) gene, partial sequence; chloroplast.	Li,Y.-H., Chen,S.-L., Yao,H. and Luo,K.	Unpublished	Lorantheae	Scurrulinae	Taxillus	genomic DNA	Chloroplast	273	trnH-psbA
Taxillus nigrans	HQ317794	LS20	Taxillus nigrans voucher LS20 ribulose-1,5-bisphosphate carboxylase/oxygenase large subunit (rbcL) gene, partial cds; chloroplast.	Li,Y.-H., Chen,S.-L., Yao,H. and Luo,K.	Unpublished	Lorantheae	Scurrulinae	Taxillus	genomic DNA	Chloroplast	703	rbcL
Taxillus nigrans	HQ317795	LS21	Taxillus nigrans voucher LS21 ribulose-1,5-bisphosphate carboxylase/oxygenase large subunit (rbcL) gene, partial cds; chloroplast.	Li,Y.-H., Chen,S.-L., Yao,H. and Luo,K.	Unpublished	Lorantheae	Scurrulinae	Taxillus	genomic DNA	Chloroplast	703	rbcL
Taxillus nigrans	HQ317835	LS20	Taxillus nigrans voucher LS20 PsbA (psbA) gene, partial cds; psbA-trnH intergenic spacer, complete sequence; and tRNA-His (trnH) gene, partial sequence; chloroplast.	Li,Y.-H., Chen,S.-L., Yao,H. and Luo,K.	Unpublished	Lorantheae	Scurrulinae	Taxillus	genomic DNA	Chloroplast	224	trnH-psbA
Taxillus nigrans	HQ317836	LS21	Taxillus nigrans voucher LS21 PsbA (psbA) gene, partial cds; psbA-trnH intergenic spacer, complete sequence; and tRNA-His (trnH) gene, partial sequence; chloroplast.	Li,Y.-H., Chen,S.-L., Yao,H. and Luo,K.	Unpublished	Lorantheae	Scurrulinae	Taxillus	genomic DNA	Chloroplast	224	trnH-psbA
Taxillus sclerophyllus	JQ933498	Chase, 17408, (K)	Taxillus sclerophyllus voucher Chase, 17408, (K) ribulose-1,5-bisphosphate carboxylase/oxygenase large subunit (rbcL) gene, partial cds; plastid.	Saslis-Lagoudakis,C.H., Savolainen,V., Williamson,E.M., Forest,F.,	Proc. Natl. Acad. Sci. U.S.A. 109 (39), 15835-15840 (2012)	Lorantheae	Scurrulinae	Taxillus	genomic DNA	Chloroplast	675	rbcL
Taxillus sutchuenensis	AY191133	UNKNOWN	Taxillus sutchuenensis tRNA-Leu (trnL) gene, partial sequence; chloroplast gene for chloroplast product.	Han,R.L., Hao,G. and Zhang,D.X.	Unpublished	Lorantheae	Scurrulinae	Taxillus	genomic DNA	Chloroplast	313	trnL/LF
Taxillus sutchuenensis	HQ317796	LS16	Taxillus sutchuenensis voucher LS16 ribulose-1,5-bisphosphate carboxylase/oxygenase large subunit (rbcL) gene, partial cds; chloroplast.	Li,Y.-H., Chen,S.-L., Yao,H. and Luo,K.	Unpublished	Lorantheae	Scurrulinae	Taxillus	genomic DNA	Chloroplast	703	rbcL
Taxillus sutchuenensis	HQ317797	LS17	Taxillus sutchuenensis voucher LS17 ribulose-1,5-bisphosphate carboxylase/oxygenase large subunit (rbcL) gene, partial cds; chloroplast.	Li,Y.-H., Chen,S.-L., Yao,H. and Luo,K.	Unpublished	Lorantheae	Scurrulinae	Taxillus	genomic DNA	Chloroplast	703	rbcL
Taxillus sutchuenensis	HQ317837	LS16	Taxillus sutchuenensis voucher LS16 PsbA (psbA) gene, partial cds; psbA-trnH intergenic spacer, complete sequence; and tRNA-His (trnH) gene, partial sequence; chloroplast.	Li,Y.-H., Chen,S.-L., Yao,H. and Luo,K.	Unpublished	Lorantheae	Scurrulinae	Taxillus	genomic DNA	Chloroplast	230	trnH-psbA
Taxillus sutchuenensis	HQ317838	LS17	Taxillus sutchuenensis voucher LS17 PsbA (psbA) gene, partial cds; psbA-trnH intergenic spacer, complete sequence; and tRNA-His (trnH) gene, partial sequence; chloroplast.	Li,Y.-H., Chen,S.-L., Yao,H. and Luo,K.	Unpublished	Lorantheae	Scurrulinae	Taxillus	genomic DNA	Chloroplast	230	trnH-psbA
Taxillus sutchuenensis	HQ317798	LS10	Taxillus sutchuenensis var. duclouxii voucher LS10 ribulose-1,5-bisphosphate carboxylase/oxygenase large subunit (rbcL) gene, partial cds; chloroplast.	Li,Y.-H., Chen,S.-L., Yao,H. and Luo,K.	Unpublished	Lorantheae	Scurrulinae	Taxillus	genomic DNA	Chloroplast	703	rbcL
Taxillus sutchuenensis	HQ317799	LS11	Taxillus sutchuenensis var. duclouxii voucher LS11 ribulose-1,5-bisphosphate carboxylase/oxygenase large subunit (rbcL) gene, partial cds; chloroplast.	Li,Y.-H., Chen,S.-L., Yao,H. and Luo,K.	Unpublished	Lorantheae	Scurrulinae	Taxillus	genomic DNA	Chloroplast	703	rbcL
Taxillus sutchuenensis	HQ317839	LS10	Taxillus sutchuenensis var. duclouxii voucher LS10 PsbA (psbA) gene, partial cds; psbA-trnH intergenic spacer, complete sequence; and tRNA-His (trnH) gene, partial sequence; chloroplast.	Li,Y.-H., Chen,S.-L., Yao,H. and Luo,K.	Unpublished	Lorantheae	Scurrulinae	Taxillus	genomic DNA	Chloroplast	224	trnH-psbA
Taxillus sutchuenensis	HQ317840	LS11	Taxillus sutchuenensis var. duclouxii voucher LS11 PsbA (psbA) gene, partial cds; psbA-trnH intergenic spacer, complete sequence; and tRNA-His (trnH) gene, partial sequence; chloroplast.	Li,Y.-H., Chen,S.-L., Yao,H. and Luo,K.	Unpublished	Lorantheae	Scurrulinae	Taxillus	genomic DNA	Chloroplast	224	trnH-psbA
Taxillus wiensii	DQ333829	A. Robertson 7364	Taxillus wiensii internal transcribed spacer 1, partial sequence; 5.8S ribosomal RNA gene, complete sequence; and internal transcribed spacer 2, partial sequence.	Wilson,C.A. and Calvin,C.L.	Am. J. Bot. 93 (5), 787-796 (2006)	Lorantheae	Scurrulinae	Taxillus	genomic DNA	Nucleolus	511	ITS1; 5.8S; ITS2
Taxillus wiensii	DQ340578	A. Robertson 7364	Taxillus wiensii tRNA-Leu (trnL) gene and trnL-trnF intergenic spacer, partial sequence; chloroplast.	Wilson,C.A. and Calvin,C.L.	Am. J. Bot. 93 (5), 787-796 (2006)	Lorantheae	Scurrulinae	Taxillus	genomic DNA	Chloroplast	634	trnL/LF
Tolypanthus involucratus	EU544461	Nickrent 4907	Tolypanthus involucratus voucher Nickrent 4907 maturase K (matK) gene, partial cds; chloroplast.	Vidal-Russell,R. and Nickrent,D.L.	Am. J. Bot. 95 (8), 1015-1029 (2008)	Lorantheae	Dendrophthoinae	Tolypanthus	genomic DNA	Chloroplast	1288	matK
Tolypanthus maclurei	HQ317757	LS01	Tolypanthus maclurei voucher LS01 ribulose-1,5-bisphosphate carboxylase/oxygenase large subunit (rbcL) gene, partial cds; chloroplast.	Li,Y.-H., Chen,S.-L., Yao,H. and Luo,K.	Unpublished	Lorantheae	Dendrophthoinae	Tolypanthus	genomic DNA	Chloroplast	703	rbcL
Tolypanthus maclurei	HQ317758	LS02	Tolypanthus maclurei voucher LS02 ribulose-1,5-bisphosphate carboxylase/oxygenase large subunit (rbcL) gene, partial cds; chloroplast.	Li,Y.-H., Chen,S.-L., Yao,H. and Luo,K.	Unpublished	Lorantheae	Dendrophthoinae	Tolypanthus	genomic DNA	Chloroplast	703	rbcL
Tolypanthus maclurei	HQ317841	LS01	Tolypanthus maclurei voucher LS01 PsbA (psbA) gene, partial cds; psbA-trnH intergenic spacer, complete sequence; and tRNA-His (trnH) gene, partial sequence; chloroplast.	Li,Y.-H., Chen,S.-L., Yao,H. and Luo,K.	Unpublished	Lorantheae	Dendrophthoinae	Tolypanthus	genomic DNA	Chloroplast	326	trnH-psbA
Tolypanthus maclurei	HQ317842	LS02	Tolypanthus maclurei voucher LS02 PsbA (psbA) gene, partial cds; psbA-trnH intergenic spacer, complete sequence; and tRNA-His (trnH) gene, partial sequence; chloroplast.	Li,Y.-H., Chen,S.-L., Yao,H. and Luo,K.	Unpublished	Lorantheae	Dendrophthoinae	Tolypanthus	genomic DNA	Chloroplast	328	trnH-psbA
Tripodanthus acutifolius	L24424	UNKNOWN	Tripodanthus acutifolius (Ruiz and Pavon) Tiegh. 18S ribosomal RNA gene, partial sequence.	Nickrent,D.L. and Duff,R.J.	(in) Moreno,M.T., Cubero,J.I., Berner,D., Joel,D., Musselman,L.J.	Psittacantheae	Psittacanthinae	Tripodanthus	genomic DNA	Nucleolus	1766	18S
Tripodanthus acutifolius	DQ333864	Calvin and Wilson AR03-04	Tripodanthus acutifolius internal transcribed spacer 1, partial sequence; 5.8S ribosomal RNA gene, complete sequence; and internal transcribed spacer 2, partial sequence.	Wilson,C.A. and Calvin,C.L.	Am. J. Bot. 93 (5), 787-796 (2006)	Psittacantheae	Psittacanthinae	Tripodanthus	genomic DNA	Nucleolus	669	ITS1; 5.8S; ITS2
Tripodanthus acutifolius	DQ340615	Calvin and Wilson AR03-04	Tripodanthus acutifolius tRNA-Leu (trnL) gene and trnL-trnF intergenic spacer, partial sequence; chloroplast.	Wilson,C.A. and Calvin,C.L.	Am. J. Bot. 93 (5), 787-796 (2006)	Psittacantheae	Psittacanthinae	Tripodanthus	genomic DNA	Chloroplast	691	trnL/LF
Tripodanthus acutifolius	EU544406	Nickrent 2969	Tripodanthus acutifolius voucher Nickrent 2969 26S ribosomal RNA gene, partial sequence.	Vidal-Russell,R. and Nickrent,D.L.	Am. J. Bot. 95 (8), 1015-1029 (2008)	Psittacantheae	Psittacanthinae	Tripodanthus	genomic DNA	Nucleolus	2127	25S
Tripodanthus acutifolius	EU544462	Nickrent 2969	Tripodanthus acutifolius voucher Nickrent 2969 maturase K (matK) gene, partial cds; chloroplast.	Vidal-Russell,R. and Nickrent,D.L.	Am. J. Bot. 95 (8), 1015-1029 (2008)	Psittacantheae	Psittacanthinae	Tripodanthus	genomic DNA	Chloroplast	1400	matK
Tripodanthus acutifolius	EU544475	Nickrent 4927	Tripodanthus acutifolius voucher Nickrent 4927 ribulose-1,5-bisphosphate carboxylase/oxygenase large subunit (rbcL) gene, partial cds; chloroplast.	Vidal-Russell,R. and Nickrent,D.L.	Unpublished	Psittacantheae	Psittacanthinae	Tripodanthus	genomic DNA	Chloroplast	830	rbcL
Tripodanthus acutifolius	EU544513	Nickrent 4927	Tripodanthus acutifolius voucher Nickrent 4927 tRNA-Leu (trnL) gene, partial sequence; trnL-trnF intergenic spacer, complete sequence; and tRNA-Phe (trnF) gene, partial sequence; chloroplast.	Vidal-Russell,R. and Nickrent,D.L.	Am. J. Bot. 95 (8), 1015-1029 (2008)	Psittacantheae	Psittacanthinae	Tripodanthus	genomic DNA	Chloroplast	693	trnL/LF
Tripodanthus acutifolius	HM010404	Nickrent 4983	Tripodanthus acutifolius voucher Nickrent 4983 internal transcribed spacer 1, partial sequence; 5.8S ribosomal RNA gene, complete sequence; and internal transcribed spacer 2, partial sequence.	Amico,G.C., Vidal-Russell,R., Garcia,M.A. and Nickrent,D.L.	Syst. Bot. 37 (1), 218-225 (2012)	Psittacantheae	Psittacanthinae	Tripodanthus	genomic DNA	Nucleolus	688	ITS1; 5.8S; ITS2
Tripodanthus acutifolius	HM010405	Nickrent 4998	Tripodanthus acutifolius voucher Nickrent 4998 18S ribosomal RNA gene, partial sequence; internal transcribed spacer 1, 5.8S ribosomal RNA gene, and internal transcribed spacer 2, complete sequence; and 28S ribosomal RNA gene, partial sequence.	Amico,G.C., Vidal-Russell,R., Garcia,M.A. and Nickrent,D.L.	Syst. Bot. 37 (1), 218-225 (2012)	Psittacantheae	Psittacanthinae	Tripodanthus	genomic DNA	Nucleolus	726	ITS1; 5.8S; ITS2
Tripodanthus acutifolius	HM010410	Nickrent 5321	Tripodanthus acutifolius voucher Nickrent 5321 internal transcribed spacer 1, partial sequence; 5.8S ribosomal RNA gene and internal transcribed spacer 2, complete sequence; and 28S ribosomal RNA gene, partial sequence.	Amico,G.C., Vidal-Russell,R., Garcia,M.A. and Nickrent,D.L.	Syst. Bot. 37 (1), 218-225 (2012)	Psittacantheae	Psittacanthinae	Tripodanthus	genomic DNA	Nucleolus	689	ITS1; 5.8S; ITS2
Tripodanthus acutifolius	HM010411	Nickrent 5323	Tripodanthus acutifolius voucher Nickrent 5323 internal transcribed spacer 1, partial sequence; 5.8S ribosomal RNA gene, complete sequence; and internal transcribed spacer 2, partial sequence.	Amico,G.C., Vidal-Russell,R., Garcia,M.A. and Nickrent,D.L.	Syst. Bot. 37 (1), 218-225 (2012)	Psittacantheae	Psittacanthinae	Tripodanthus	genomic DNA	Nucleolus	620	ITS1; 5.8S; ITS2
Tripodanthus acutifolius	HM010412	Nickrent 5325	Tripodanthus acutifolius voucher Nickrent 5325 18S ribosomal RNA gene, partial sequence; internal transcribed spacer 1, 5.8S ribosomal RNA gene, and internal transcribed spacer 2, complete sequence; and 28S ribosomal RNA gene, partial sequence.	Amico,G.C., Vidal-Russell,R., Garcia,M.A. and Nickrent,D.L.	Syst. Bot. 37 (1), 218-225 (2012)	Psittacantheae	Psittacanthinae	Tripodanthus	genomic DNA	Nucleolus	712	ITS1; 5.8S; ITS2
Tripodanthus acutifolius	HM010413	Nickrent 5326	Tripodanthus acutifolius voucher Nickrent 5326 18S ribosomal RNA gene, partial sequence; internal transcribed spacer 1, 5.8S ribosomal RNA gene, and internal transcribed spacer 2, complete sequence; and 28S ribosomal RNA gene, partial sequence.	Amico,G.C., Vidal-Russell,R., Garcia,M.A. and Nickrent,D.L.	Syst. Bot. 37 (1), 218-225 (2012)	Psittacantheae	Psittacanthinae	Tripodanthus	genomic DNA	Nucleolus	727	ITS1; 5.8S; ITS2
Tripodanthus acutifolius	HM010414	Nickrent 5330	Tripodanthus acutifolius voucher Nickrent 5330 18S ribosomal RNA gene, partial sequence; internal transcribed spacer 1, 5.8S ribosomal RNA gene, and internal transcribed spacer 2, complete sequence; and 28S ribosomal RNA gene, partial sequence.	Amico,G.C., Vidal-Russell,R., Garcia,M.A. and Nickrent,D.L.	Syst. Bot. 37 (1), 218-225 (2012)	Psittacantheae	Psittacanthinae	Tripodanthus	genomic DNA	Nucleolus	729	ITS1; 5.8S; ITS2
Tripodanthus acutifolius	HM010415	Nickrent 5345	Tripodanthus acutifolius voucher Nickrent 5345 internal transcribed spacer 1, partial sequence; 5.8S ribosomal RNA gene, complete sequence; and internal transcribed spacer 2, partial sequence.	Amico,G.C., Vidal-Russell,R., Garcia,M.A. and Nickrent,D.L.	Syst. Bot. 37 (1), 218-225 (2012)	Psittacantheae	Psittacanthinae	Tripodanthus	genomic DNA	Nucleolus	687	ITS1; 5.8S; ITS2
Tripodanthus acutifolius	HM010416	Nickrent 5346	Tripodanthus acutifolius voucher Nickrent 5346 18S ribosomal RNA gene, partial sequence; internal transcribed spacer 1, 5.8S ribosomal RNA gene, and internal transcribed spacer 2, complete sequence; and 28S ribosomal RNA gene, partial sequence.	Amico,G.C., Vidal-Russell,R., Garcia,M.A. and Nickrent,D.L.	Syst. Bot. 37 (1), 218-225 (2012)	Psittacantheae	Psittacanthinae	Tripodanthus	genomic DNA	Nucleolus	730	ITS1; 5.8S; ITS2
Tripodanthus acutifolius	HM010417	Nickrent 5349	Tripodanthus acutifolius voucher Nickrent 5349 18S ribosomal RNA gene, partial sequence; internal transcribed spacer 1, 5.8S ribosomal RNA gene, and internal transcribed spacer 2, complete sequence; and 28S ribosomal RNA gene, partial sequence.	Amico,G.C., Vidal-Russell,R., Garcia,M.A. and Nickrent,D.L.	Syst. Bot. 37 (1), 218-225 (2012)	Psittacantheae	Psittacanthinae	Tripodanthus	genomic DNA	Nucleolus	726	ITS1; 5.8S; ITS2
Tripodanthus acutifolius	HM010418	Nickrent 5350	Tripodanthus acutifolius voucher Nickrent 5350 18S ribosomal RNA gene, partial sequence; internal transcribed spacer 1, 5.8S ribosomal RNA gene, and internal transcribed spacer 2, complete sequence; and 28S ribosomal RNA gene, partial sequence.	Amico,G.C., Vidal-Russell,R., Garcia,M.A. and Nickrent,D.L.	Syst. Bot. 37 (1), 218-225 (2012)	Psittacantheae	Psittacanthinae	Tripodanthus	genomic DNA	Nucleolus	714	ITS1; 5.8S; ITS2
Tripodanthus acutifolius	HM010419	Nickrent 5548	Tripodanthus acutifolius voucher Nickrent 5548 internal transcribed spacer 1, partial sequence; 5.8S ribosomal RNA gene, complete sequence; and internal transcribed spacer 2, partial sequence.	Amico,G.C., Vidal-Russell,R., Garcia,M.A. and Nickrent,D.L.	Syst. Bot. 37 (1), 218-225 (2012)	Psittacantheae	Psittacanthinae	Tripodanthus	genomic DNA	Nucleolus	686	ITS1; 5.8S; ITS2
Tripodanthus acutifolius	HM010421	Nickrent 5550	Tripodanthus acutifolius voucher Nickrent 5550 18S ribosomal RNA gene, partial sequence; internal transcribed spacer 1, 5.8S ribosomal RNA gene, and internal transcribed spacer 2, complete sequence; and 28S ribosomal RNA gene, partial sequence.	Amico,G.C., Vidal-Russell,R., Garcia,M.A. and Nickrent,D.L.	Syst. Bot. 37 (1), 218-225 (2012)	Psittacantheae	Psittacanthinae	Tripodanthus	genomic DNA	Nucleolus	726	ITS1; 5.8S; ITS2
Tripodanthus acutifolius	HM010422	Nickrent 5551	Tripodanthus acutifolius voucher Nickrent 5551 18S ribosomal RNA gene, partial sequence; internal transcribed spacer 1 and 5.8S ribosomal RNA gene, complete sequence; and internal transcribed spacer 2, partial sequence.	Amico,G.C., Vidal-Russell,R., Garcia,M.A. and Nickrent,D.L.	Syst. Bot. 37 (1), 218-225 (2012)	Psittacantheae	Psittacanthinae	Tripodanthus	genomic DNA	Nucleolus	697	ITS1; 5.8S; ITS2
Tripodanthus acutifolius	HM010425	Nickrent 4983	Tripodanthus acutifolius voucher Nickrent 4983 tRNA-Leu (trnL) gene, partial sequence; trnL-trnF intergenic spacer, complete sequence; and tRNA-Phe (trnF) gene, partial sequence; chloroplast.	Amico,G.C., Vidal-Russell,R., Garcia,M.A. and Nickrent,D.L.	Syst. Bot. 37 (1), 218-225 (2012)	Psittacantheae	Psittacanthinae	Tripodanthus	genomic DNA	Chloroplast	627	trnL/LF
Tripodanthus acutifolius	HM010426	Nickrent 4998	Tripodanthus acutifolius voucher Nickrent 4998 tRNA-Leu (trnL) gene, partial sequence; trnL-trnF intergenic spacer, complete sequence; and tRNA-Phe (trnF) gene, partial sequence; chloroplast.	Amico,G.C., Vidal-Russell,R., Garcia,M.A. and Nickrent,D.L.	Syst. Bot. 37 (1), 218-225 (2012)	Psittacantheae	Psittacanthinae	Tripodanthus	genomic DNA	Chloroplast	686	trnL/LF
Tripodanthus acutifolius	HM010431	Nickrent 5318	Tripodanthus acutifolius voucher Nickrent 5318 tRNA-Leu (trnL) gene, partial sequence; trnL-trnF intergenic spacer, complete sequence; and tRNA-Phe (trnF) gene, partial sequence; chloroplast.	Amico,G.C., Vidal-Russell,R., Garcia,M.A. and Nickrent,D.L.	Syst. Bot. 37 (1), 218-225 (2012)	Psittacantheae	Psittacanthinae	Tripodanthus	genomic DNA	Chloroplast	590	trnL/LF
Tripodanthus acutifolius	HM010432	Nickrent 5321	Tripodanthus acutifolius voucher Nickrent 5321 tRNA-Leu (trnL) gene, partial sequence; trnL-trnF intergenic spacer, complete sequence; and tRNA-Phe (trnF) gene, partial sequence; chloroplast.	Amico,G.C., Vidal-Russell,R., Garcia,M.A. and Nickrent,D.L.	Syst. Bot. 37 (1), 218-225 (2012)	Psittacantheae	Psittacanthinae	Tripodanthus	genomic DNA	Chloroplast	687	trnL/LF
Tripodanthus acutifolius	HM010433	Nickrent 5323	Tripodanthus acutifolius voucher Nickrent 5323 tRNA-Leu (trnL) gene, partial sequence; trnL-trnF intergenic spacer, complete sequence; and tRNA-Phe (trnF) gene, partial sequence; chloroplast.	Amico,G.C., Vidal-Russell,R., Garcia,M.A. and Nickrent,D.L.	Syst. Bot. 37 (1), 218-225 (2012)	Psittacantheae	Psittacanthinae	Tripodanthus	genomic DNA	Chloroplast	690	trnL/LF
Tripodanthus acutifolius	HM010434	Nickrent 5325	Tripodanthus acutifolius voucher Nickrent 5325 tRNA-Leu (trnL) gene, partial sequence; trnL-trnF intergenic spacer, complete sequence; and tRNA-Phe (trnF) gene, partial sequence; chloroplast.	Amico,G.C., Vidal-Russell,R., Garcia,M.A. and Nickrent,D.L.	Syst. Bot. 37 (1), 218-225 (2012)	Psittacantheae	Psittacanthinae	Tripodanthus	genomic DNA	Chloroplast	691	trnL/LF
Tripodanthus acutifolius	HM010435	Nickrent 5326	Tripodanthus acutifolius voucher Nickrent 5326 tRNA-Leu (trnL) gene, partial sequence; and trnL-trnF intergenic spacer, complete sequence; chloroplast.	Amico,G.C., Vidal-Russell,R., Garcia,M.A. and Nickrent,D.L.	Syst. Bot. 37 (1), 218-225 (2012)	Psittacantheae	Psittacanthinae	Tripodanthus	genomic DNA	Chloroplast	653	trnL/LF
Tripodanthus acutifolius	HM010436	Nickrent 5330	Tripodanthus acutifolius voucher Nickrent 5330 tRNA-Leu (trnL) gene, partial sequence; trnL-trnF intergenic spacer, complete sequence; and tRNA-Phe (trnF) gene, partial sequence; chloroplast.	Amico,G.C., Vidal-Russell,R., Garcia,M.A. and Nickrent,D.L.	Syst. Bot. 37 (1), 218-225 (2012)	Psittacantheae	Psittacanthinae	Tripodanthus	genomic DNA	Chloroplast	697	trnL/LF
Tripodanthus acutifolius	HM010437	Nickrent 5345	Tripodanthus acutifolius voucher Nickrent 5345 tRNA-Leu (trnL) gene, partial sequence; and trnL-trnF intergenic spacer, complete sequence; chloroplast.	Amico,G.C., Vidal-Russell,R., Garcia,M.A. and Nickrent,D.L.	Syst. Bot. 37 (1), 218-225 (2012)	Psittacantheae	Psittacanthinae	Tripodanthus	genomic DNA	Chloroplast	640	trnL/LF
Tripodanthus acutifolius	HM010438	Nickrent 5346	Tripodanthus acutifolius voucher Nickrent 5346 tRNA-Leu (trnL) gene, partial sequence; and trnL-trnF intergenic spacer, complete sequence; chloroplast.	Amico,G.C., Vidal-Russell,R., Garcia,M.A. and Nickrent,D.L.	Syst. Bot. 37 (1), 218-225 (2012)	Psittacantheae	Psittacanthinae	Tripodanthus	genomic DNA	Chloroplast	633	trnL/LF
Tripodanthus acutifolius	HM010439	Nickrent 5349	Tripodanthus acutifolius voucher Nickrent 5349 tRNA-Leu (trnL) gene, partial sequence; and trnL-trnF intergenic spacer, complete sequence; chloroplast.	Amico,G.C., Vidal-Russell,R., Garcia,M.A. and Nickrent,D.L.	Syst. Bot. 37 (1), 218-225 (2012)	Psittacantheae	Psittacanthinae	Tripodanthus	genomic DNA	Chloroplast	642	trnL/LF
Tripodanthus acutifolius	HM010440	Nickrent 5350	Tripodanthus acutifolius voucher Nickrent 5350 tRNA-Leu (trnL) gene, partial sequence; trnL-trnF intergenic spacer, complete sequence; and tRNA-Phe (trnF) gene, partial sequence; chloroplast.	Amico,G.C., Vidal-Russell,R., Garcia,M.A. and Nickrent,D.L.	Syst. Bot. 37 (1), 218-225 (2012)	Psittacantheae	Psittacanthinae	Tripodanthus	genomic DNA	Chloroplast	668	trnL/LF
Tripodanthus acutifolius	HM010441	Nickrent 5548	Tripodanthus acutifolius voucher Nickrent 5548 tRNA-Leu (trnL) gene, partial sequence; trnL-trnF intergenic spacer, complete sequence; and tRNA-Phe (trnF) gene, partial sequence; chloroplast.	Amico,G.C., Vidal-Russell,R., Garcia,M.A. and Nickrent,D.L.	Syst. Bot. 37 (1), 218-225 (2012)	Psittacantheae	Psittacanthinae	Tripodanthus	genomic DNA	Chloroplast	638	trnL/LF
Tripodanthus acutifolius	HM010443	Nickrent 5550	Tripodanthus acutifolius voucher Nickrent 5550 tRNA-Leu (trnL) gene, partial sequence; trnL-trnF intergenic spacer, complete sequence; and tRNA-Phe (trnF) gene, partial sequence; chloroplast.	Amico,G.C., Vidal-Russell,R., Garcia,M.A. and Nickrent,D.L.	Syst. Bot. 37 (1), 218-225 (2012)	Psittacantheae	Psittacanthinae	Tripodanthus	genomic DNA	Chloroplast	692	trnL/LF
Tripodanthus acutifolius	HM010444	Nickrent 5551	Tripodanthus acutifolius voucher Nickrent 5551 tRNA-Leu (trnL) gene, partial sequence; trnL-trnF intergenic spacer, complete sequence; and tRNA-Phe (trnF) gene, partial sequence; chloroplast.	Amico,G.C., Vidal-Russell,R., Garcia,M.A. and Nickrent,D.L.	Syst. Bot. 37 (1), 218-225 (2012)	Psittacantheae	Psittacanthinae	Tripodanthus	genomic DNA	Chloroplast	661	trnL/LF
Tripodanthus acutifolius	HM010447	Nickrent 4927	Tripodanthus acutifolius voucher Nickrent 4927 atpB-rbcL intergenic spacer, partial sequence; and ribulose-1,5-bisphosphate carboxylase/oxygenase large subunit (rbcL) gene, partial cds; chloroplast.	Amico,G.C., Vidal-Russell,R., Garcia,M.A. and Nickrent,D.L.	Syst. Bot. 37 (1), 218-225 (2012)	Psittacantheae	Psittacanthinae	Tripodanthus	genomic DNA	Chloroplast	519	atpB-rbcL
Tripodanthus acutifolius	HM010448	Nickrent 4998	Tripodanthus acutifolius voucher Nickrent 4998 atpB-rbcL intergenic spacer, partial sequence; and ribulose-1,5-bisphosphate carboxylase/oxygenase large subunit (rbcL) gene, partial cds; chloroplast.	Amico,G.C., Vidal-Russell,R., Garcia,M.A. and Nickrent,D.L.	Syst. Bot. 37 (1), 218-225 (2012)	Psittacantheae	Psittacanthinae	Tripodanthus	genomic DNA	Chloroplast	518	atpB-rbcL
Tripodanthus acutifolius	HM010451	Nickrent 5318	Tripodanthus acutifolius voucher Nickrent 5318 atpB-rbcL intergenic spacer, partial sequence; and ribulose-1,5-bisphosphate carboxylase/oxygenase large subunit (rbcL) gene, partial cds; chloroplast.	Amico,G.C., Vidal-Russell,R., Garcia,M.A. and Nickrent,D.L.	Syst. Bot. 37 (1), 218-225 (2012)	Psittacantheae	Psittacanthinae	Tripodanthus	genomic DNA	Chloroplast	634	atpB-rbcL
Tripodanthus acutifolius	HM010452	Nickrent 5321	Tripodanthus acutifolius voucher Nickrent 5321 atpB-rbcL intergenic spacer, partial sequence; and ribulose-1,5-bisphosphate carboxylase/oxygenase large subunit (rbcL) gene, partial cds; chloroplast.	Amico,G.C., Vidal-Russell,R., Garcia,M.A. and Nickrent,D.L.	Syst. Bot. 37 (1), 218-225 (2012)	Psittacantheae	Psittacanthinae	Tripodanthus	genomic DNA	Chloroplast	524	atpB-rbcL
Tripodanthus acutifolius	HM010453	Nickrent 5323	Tripodanthus acutifolius voucher Nickrent 5323 atpB-rbcL intergenic spacer, partial sequence; and ribulose-1,5-bisphosphate carboxylase/oxygenase large subunit (rbcL) gene, partial cds; chloroplast.	Amico,G.C., Vidal-Russell,R., Garcia,M.A. and Nickrent,D.L.	Syst. Bot. 37 (1), 218-225 (2012)	Psittacantheae	Psittacanthinae	Tripodanthus	genomic DNA	Chloroplast	642	atpB-rbcL
Tripodanthus acutifolius	HM010454	Nickrent 5326	Tripodanthus acutifolius voucher Nickrent 5326 atpB-rbcL intergenic spacer, partial sequence; and ribulose-1,5-bisphosphate carboxylase/oxygenase large subunit (rbcL) gene, partial cds; chloroplast.	Amico,G.C., Vidal-Russell,R., Garcia,M.A. and Nickrent,D.L.	Syst. Bot. 37 (1), 218-225 (2012)	Psittacantheae	Psittacanthinae	Tripodanthus	genomic DNA	Chloroplast	521	atpB-rbcL
Tripodanthus acutifolius	HM010455	Nickrent 5330	Tripodanthus acutifolius voucher Nickrent 5330 atpB-rbcL intergenic spacer, partial sequence; and ribulose-1,5-bisphosphate carboxylase/oxygenase large subunit (rbcL) gene, partial cds; chloroplast.	Amico,G.C., Vidal-Russell,R., Garcia,M.A. and Nickrent,D.L.	Syst. Bot. 37 (1), 218-225 (2012)	Psittacantheae	Psittacanthinae	Tripodanthus	genomic DNA	Chloroplast	519	atpB-rbcL
Tripodanthus acutifolius	HM010456	Nickrent 5345	Tripodanthus acutifolius voucher Nickrent 5345 atpB-rbcL intergenic spacer, partial sequence; and ribulose-1,5-bisphosphate carboxylase/oxygenase large subunit (rbcL) gene, partial cds; chloroplast.	Amico,G.C., Vidal-Russell,R., Garcia,M.A. and Nickrent,D.L.	Syst. Bot. 37 (1), 218-225 (2012)	Psittacantheae	Psittacanthinae	Tripodanthus	genomic DNA	Chloroplast	508	atpB-rbcL
Tripodanthus acutifolius	HM010457	Nickrent 5346	Tripodanthus acutifolius voucher Nickrent 5346 atpB-rbcL intergenic spacer, partial sequence; and ribulose-1,5-bisphosphate carboxylase/oxygenase large subunit (rbcL) gene, partial cds; chloroplast.	Amico,G.C., Vidal-Russell,R., Garcia,M.A. and Nickrent,D.L.	Syst. Bot. 37 (1), 218-225 (2012)	Psittacantheae	Psittacanthinae	Tripodanthus	genomic DNA	Chloroplast	519	atpB-rbcL
Tripodanthus acutifolius	HM010458	Nickrent 5349	Tripodanthus acutifolius voucher Nickrent 5349 atpB-rbcL intergenic spacer, partial sequence; and ribulose-1,5-bisphosphate carboxylase/oxygenase large subunit (rbcL) gene, partial cds; chloroplast.	Amico,G.C., Vidal-Russell,R., Garcia,M.A. and Nickrent,D.L.	Syst. Bot. 37 (1), 218-225 (2012)	Psittacantheae	Psittacanthinae	Tripodanthus	genomic DNA	Chloroplast	527	atpB-rbcL
Tripodanthus acutifolius	HM010459	Nickrent 5350	Tripodanthus acutifolius voucher Nickrent 5350 atpB-rbcL intergenic spacer, partial sequence; and ribulose-1,5-bisphosphate carboxylase/oxygenase large subunit (rbcL) gene, partial cds; chloroplast.	Amico,G.C., Vidal-Russell,R., Garcia,M.A. and Nickrent,D.L.	Syst. Bot. 37 (1), 218-225 (2012)	Psittacantheae	Psittacanthinae	Tripodanthus	genomic DNA	Chloroplast	634	atpB-rbcL
Tripodanthus belmirensis	HM010406	Nickrent 5050	Tripodanthus belmirensis voucher Nickrent 5050 internal transcribed spacer 1, partial sequence; 5.8S ribosomal RNA gene and internal transcribed spacer 2, complete sequence; and 28S ribosomal RNA gene, partial sequence.	Amico,G.C., Vidal-Russell,R., Garcia,M.A. and Nickrent,D.L.	Syst. Bot. 37 (1), 218-225 (2012)	Psittacantheae	Psittacanthinae	Tripodanthus	genomic DNA	Nucleolus	692	ITS1; 5.8S; ITS2
Tripodanthus belmirensis	HM010427	Nickrent 5050	Tripodanthus belmirensis voucher Nickrent 5050 tRNA-Leu (trnL) gene, partial sequence; trnL-trnF intergenic spacer, complete sequence; and tRNA-Phe (trnF) gene, partial sequence; chloroplast.	Amico,G.C., Vidal-Russell,R., Garcia,M.A. and Nickrent,D.L.	Syst. Bot. 37 (1), 218-225 (2012)	Psittacantheae	Psittacanthinae	Tripodanthus	genomic DNA	Chloroplast	642	trnL/LF
Tripodanthus belmirensis	HM010449	Nickrent 5050	Tripodanthus belmirensis voucher Nickrent 5050 atpB-rbcL intergenic spacer, partial sequence; and ribulose-1,5-bisphosphate carboxylase/oxygenase large subunit (rbcL) gene, partial cds; chloroplast.	Amico,G.C., Vidal-Russell,R., Garcia,M.A. and Nickrent,D.L.	Syst. Bot. 37 (1), 218-225 (2012)	Psittacantheae	Psittacanthinae	Tripodanthus	genomic DNA	Chloroplast	312	atpB-rbcL
Tripodanthus flagellaris	DQ333863	Calvin and Wilson AR03-10	Tripodanthus flagellaris internal transcribed spacer 1, partial sequence; 5.8S ribosomal RNA gene, complete sequence; and internal transcribed spacer 2, partial sequence.	Wilson,C.A. and Calvin,C.L.	Am. J. Bot. 93 (5), 787-796 (2006)	Psittacantheae	Psittacanthinae	Tripodanthus	genomic DNA	Nucleolus	657	ITS1; 5.8S; ITS2
Tripodanthus flagellaris	DQ340614	Calvin and Wilson AR03-10	Tripodanthus flagellaris tRNA-Leu (trnL) gene and trnL-trnF intergenic spacer, partial sequence; chloroplast.	Wilson,C.A. and Calvin,C.L.	Am. J. Bot. 93 (5), 787-796 (2006)	Psittacantheae	Psittacanthinae	Tripodanthus	genomic DNA	Chloroplast	620	trnL/LF
Tripodanthus flagellaris	HM010407	Nickrent 5204	Tripodanthus flagellaris voucher Nickrent 5204 18S ribosomal RNA gene, partial sequence; internal transcribed spacer 1, 5.8S ribosomal RNA gene, and internal transcribed spacer 2, complete sequence; and 28S ribosomal RNA gene, partial sequence.	Amico,G.C., Vidal-Russell,R., Garcia,M.A. and Nickrent,D.L.	Syst. Bot. 37 (1), 218-225 (2012)	Psittacantheae	Psittacanthinae	Tripodanthus	genomic DNA	Nucleolus	719	ITS1; 5.8S; ITS2
Tripodanthus flagellaris	HM010408	Nickrent 5210	Tripodanthus flagellaris voucher Nickrent 5210 internal transcribed spacer 1, partial sequence; 5.8S ribosomal RNA gene and internal transcribed spacer 2, complete sequence; and 28S ribosomal RNA gene, partial sequence.	Amico,G.C., Vidal-Russell,R., Garcia,M.A. and Nickrent,D.L.	Syst. Bot. 37 (1), 218-225 (2012)	Psittacantheae	Psittacanthinae	Tripodanthus	genomic DNA	Nucleolus	680	ITS1; 5.8S; ITS2
Tripodanthus flagellaris	HM010409	Nickrent 5211	Tripodanthus flagellaris voucher Nickrent 5211 18S ribosomal RNA gene, partial sequence; internal transcribed spacer 1, 5.8S ribosomal RNA gene, and internal transcribed spacer 2, complete sequence; and 28S ribosomal RNA gene, partial sequence.	Amico,G.C., Vidal-Russell,R., Garcia,M.A. and Nickrent,D.L.	Syst. Bot. 37 (1), 218-225 (2012)	Psittacantheae	Psittacanthinae	Tripodanthus	genomic DNA	Nucleolus	714	ITS1; 5.8S; ITS2
Tripodanthus flagellaris	HM010420	Nickrent 5549	Tripodanthus flagellaris voucher Nickrent 5549 18S ribosomal RNA gene, partial sequence; internal transcribed spacer 1, 5.8S ribosomal RNA gene, and internal transcribed spacer 2, complete sequence; and 28S ribosomal RNA gene, partial sequence.	Amico,G.C., Vidal-Russell,R., Garcia,M.A. and Nickrent,D.L.	Syst. Bot. 37 (1), 218-225 (2012)	Psittacantheae	Psittacanthinae	Tripodanthus	genomic DNA	Nucleolus	715	ITS1; 5.8S; ITS2
Tripodanthus flagellaris	HM010423	Nickrent 5552	Tripodanthus flagellaris voucher Nickrent 5552 18S ribosomal RNA gene, partial sequence; internal transcribed spacer 1, 5.8S ribosomal RNA gene, and internal transcribed spacer 2, complete sequence; and 28S ribosomal RNA gene, partial sequence.	Amico,G.C., Vidal-Russell,R., Garcia,M.A. and Nickrent,D.L.	Syst. Bot. 37 (1), 218-225 (2012)	Psittacantheae	Psittacanthinae	Tripodanthus	genomic DNA	Nucleolus	688	ITS1; 5.8S; ITS2
Tripodanthus flagellaris	HM010424	Nickrent 5553	Tripodanthus flagellaris voucher Nickrent 5553 18S ribosomal RNA gene, partial sequence; internal transcribed spacer 1 and 5.8S ribosomal RNA gene, complete sequence; and internal transcribed spacer 2, partial sequence.	Amico,G.C., Vidal-Russell,R., Garcia,M.A. and Nickrent,D.L.	Syst. Bot. 37 (1), 218-225 (2012)	Psittacantheae	Psittacanthinae	Tripodanthus	genomic DNA	Nucleolus	683	ITS1; 5.8S; ITS2
Tripodanthus flagellaris	HM010428	Nickrent 5204	Tripodanthus flagellaris voucher Nickrent 5204 tRNA-Leu (trnL) gene, partial sequence; trnL-trnF intergenic spacer, complete sequence; and tRNA-Phe (trnF) gene, partial sequence; chloroplast.	Amico,G.C., Vidal-Russell,R., Garcia,M.A. and Nickrent,D.L.	Syst. Bot. 37 (1), 218-225 (2012)	Psittacantheae	Psittacanthinae	Tripodanthus	genomic DNA	Chloroplast	677	trnL/LF
Tripodanthus flagellaris	HM010429	Nickrent 5210	Tripodanthus flagellaris voucher Nickrent 5210 tRNA-Leu (trnL) gene, partial sequence; trnL-trnF intergenic spacer, complete sequence; and tRNA-Phe (trnF) gene, partial sequence; chloroplast.	Amico,G.C., Vidal-Russell,R., Garcia,M.A. and Nickrent,D.L.	Syst. Bot. 37 (1), 218-225 (2012)	Psittacantheae	Psittacanthinae	Tripodanthus	genomic DNA	Chloroplast	670	trnL/LF
Tripodanthus flagellaris	HM010430	Nickrent 5211	Tripodanthus flagellaris voucher Nickrent 5211 tRNA-Leu (trnL) gene, partial sequence; trnL-trnF intergenic spacer, complete sequence; and tRNA-Phe (trnF) gene, partial sequence; chloroplast.	Amico,G.C., Vidal-Russell,R., Garcia,M.A. and Nickrent,D.L.	Syst. Bot. 37 (1), 218-225 (2012)	Psittacantheae	Psittacanthinae	Tripodanthus	genomic DNA	Chloroplast	675	trnL/LF
Tripodanthus flagellaris	HM010442	Nickrent 5549	Tripodanthus flagellaris voucher Nickrent 5549 tRNA-Leu (trnL) gene, partial sequence; trnL-trnF intergenic spacer, complete sequence; and tRNA-Phe (trnF) gene, partial sequence; chloroplast.	Amico,G.C., Vidal-Russell,R., Garcia,M.A. and Nickrent,D.L.	Syst. Bot. 37 (1), 218-225 (2012)	Psittacantheae	Psittacanthinae	Tripodanthus	genomic DNA	Chloroplast	624	trnL/LF
Tripodanthus flagellaris	HM010445	Nickrent 5552	Tripodanthus flagellaris voucher Nickrent 5552 tRNA-Leu (trnL) gene, partial sequence; trnL-trnF intergenic spacer, complete sequence; and tRNA-Phe (trnF) gene, partial sequence; chloroplast.	Amico,G.C., Vidal-Russell,R., Garcia,M.A. and Nickrent,D.L.	Syst. Bot. 37 (1), 218-225 (2012)	Psittacantheae	Psittacanthinae	Tripodanthus	genomic DNA	Chloroplast	632	trnL/LF
Tripodanthus flagellaris	HM010446	Nickrent 5553	Tripodanthus flagellaris voucher Nickrent 5553 tRNA-Leu (trnL) gene, partial sequence; trnL-trnF intergenic spacer, complete sequence; and tRNA-Phe (trnF) gene, partial sequence; chloroplast.	Amico,G.C., Vidal-Russell,R., Garcia,M.A. and Nickrent,D.L.	Syst. Bot. 37 (1), 218-225 (2012)	Psittacantheae	Psittacanthinae	Tripodanthus	genomic DNA	Chloroplast	638	trnL/LF
Tripodanthus flagellaris	HM010450	Nickrent 5204	Tripodanthus flagellaris voucher Nickrent 5204 atpB-rbcL intergenic spacer, partial sequence; and ribulose-1,5-bisphosphate carboxylase/oxygenase large subunit (rbcL) gene, partial cds; chloroplast.	Amico,G.C., Vidal-Russell,R., Garcia,M.A. and Nickrent,D.L.	Syst. Bot. 37 (1), 218-225 (2012)	Psittacantheae	Psittacanthinae	Tripodanthus	genomic DNA	Chloroplast	644	atpB-rbcL
Tristerix aphyllus	DQ442941	G. Amico 97 (BRCU)	Tristerix aphyllus isolate FJ atpB gene and atpB-rbcL intergenic spacer, partial sequence; chloroplast.	Amico,G.C., Vidal-Russell,R. and Nickrent,D.L.	Am. J. Bot. 94 (4), 558-567 (2007)	Psittacantheae	Ligarinae	Tristerix	genomic DNA	Chloroplast	607	atpB-rbcL
Tristerix aphyllus	DQ442942	L. Suarez S/N (BRCU)	Tristerix aphyllus isolate CH atpB gene, partial sequence; atpB-rbcL intergenic spacer, complete sequence; and ribulose 1,5-bisphosphate carboxylase/oxygenase large subunit (rbcL) gene, partial cds; chloroplast.	Amico,G.C., Vidal-Russell,R. and Nickrent,D.L.	Am. J. Bot. 94 (4), 558-567 (2007)	Psittacantheae	Ligarinae	Tristerix	genomic DNA	Chloroplast	673	atpB-rbcL
Tristerix aphyllus	DQ442943	G. Amico 162 (BRCU)	Tristerix aphyllus isolate LS atpB gene, partial sequence; atpB-rbcL intergenic spacer, complete sequence; and ribulose 1,5-bisphosphate carboxylase/oxygenase large subunit (rbcL) gene, partial cds; chloroplast.	Amico,G.C., Vidal-Russell,R. and Nickrent,D.L.	Am. J. Bot. 94 (4), 558-567 (2007)	Psittacantheae	Ligarinae	Tristerix	genomic DNA	Chloroplast	675	atpB-rbcL
Tristerix aphyllus	DQ442944	G. Amico 166 (BRCU)	Tristerix aphyllus isolate LC atpB gene, partial sequence; atpB-rbcL intergenic spacer, complete sequence; and ribulose 1,5-bisphosphate carboxylase/oxygenase large subunit (rbcL) gene, partial cds; chloroplast.	Amico,G.C., Vidal-Russell,R. and Nickrent,D.L.	Am. J. Bot. 94 (4), 558-567 (2007)	Psittacantheae	Ligarinae	Tristerix	genomic DNA	Chloroplast	673	atpB-rbcL
Tristerix aphyllus	DQ442916	G. Amico 97 (BCRU)	Tristerix aphyllus isolate FJ tRNA-Leu (trnL) gene and trnL-trnF intergenic spacer, partial sequence; chloroplast.	Amico,G.C., Vidal-Russell,R. and Nickrent,D.L.	Am. J. Bot. 94 (4), 558-567 (2007)	Psittacantheae	Ligarinae	Tristerix	genomic DNA	Chloroplast	650	trnL/LF
Tristerix aphyllus	DQ442917	L. Suarez S/N (BCRU)	Tristerix aphyllus isolate CH tRNA-Leu (trnL) gene and trnL-trnF intergenic spacer, partial sequence; chloroplast.	Amico,G.C., Vidal-Russell,R. and Nickrent,D.L.	Am. J. Bot. 94 (4), 558-567 (2007)	Psittacantheae	Ligarinae	Tristerix	genomic DNA	Chloroplast	608	trnL/LF
Tristerix aphyllus	DQ442918	G. Amico 162 (BCRU)	Tristerix aphyllus isolate LS tRNA-Leu (trnL) gene and trnL-trnF intergenic spacer, partial sequence; chloroplast.	Amico,G.C., Vidal-Russell,R. and Nickrent,D.L.	Am. J. Bot. 94 (4), 558-567 (2007)	Psittacantheae	Ligarinae	Tristerix	genomic DNA	Chloroplast	662	trnL/LF
Tristerix aphyllus	DQ442919	G. Amico 166 (BCRU)	Tristerix aphyllus isolate LC tRNA-Leu (trnL) gene and trnL-trnF intergenic spacer, partial sequence; chloroplast.	Amico,G.C., Vidal-Russell,R. and Nickrent,D.L.	Am. J. Bot. 94 (4), 558-567 (2007)	Psittacantheae	Ligarinae	Tristerix	genomic DNA	Chloroplast	664	trnL/LF
Tristerix aphyllus	DQ442964	L. Suarez S/N (BRCU)	Tristerix aphyllus isolate CH 18S ribosomal RNA gene, partial sequence; internal transcribed spacer 1, 5.8S ribosomal RNA gene, and internal transcribed spacer 2, complete sequence; and 26S ribosomal RNA gene, partial sequence.	Amico,G.C., Vidal-Russell,R. and Nickrent,D.L.	Am. J. Bot. 94 (4), 558-567 (2007)	Psittacantheae	Ligarinae	Tristerix	genomic DNA	Nucleolus	754	ITS1; 5.8S; ITS2
Tristerix aphyllus	DQ442965	G. Amico 97 (BRCU)	Tristerix aphyllus isolate FJ internal transcribed spacer 1, partial sequence; 5.8S ribosomal RNA gene and internal transcribed spacer 2, complete sequence; and 26S ribosomal RNA gene, partial sequence.	Amico,G.C., Vidal-Russell,R. and Nickrent,D.L.	Am. J. Bot. 94 (4), 558-567 (2007)	Psittacantheae	Ligarinae	Tristerix	genomic DNA	Nucleolus	562	ITS1; 5.8S; ITS2
Tristerix aphyllus	DQ442966	G. Amico 166 (BRCU)	Tristerix aphyllus isolate LC internal transcribed spacer 1, partial sequence; 5.8S ribosomal RNA gene and internal transcribed spacer 2, complete sequence; and 26S ribosomal RNA gene, partial sequence.	Amico,G.C., Vidal-Russell,R. and Nickrent,D.L.	Am. J. Bot. 94 (4), 558-567 (2007)	Psittacantheae	Ligarinae	Tristerix	genomic DNA	Nucleolus	501	ITS1; 5.8S; ITS2
Tristerix chodatianus	DQ442953	D.N. Smith, Valencia, & Gonzales 9536 3337838 (MO)	Tristerix chodatianus isolate HU atpB gene, partial sequence; atpB-rbcL intergenic spacer, complete sequence; and ribulose 1,5-bisphosphate carboxylase/oxygenase large subunit (rbcL) gene, partial cds; chloroplast.	Amico,G.C., Vidal-Russell,R. and Nickrent,D.L.	Am. J. Bot. 94 (4), 558-567 (2007)	Psittacantheae	Ligarinae	Tristerix	genomic DNA	Chloroplast	594	atpB-rbcL
Tristerix chodatianus	DQ442938	D.N. Smith, Valencia, & Gonzales 9536 3337838 (MO)	Tristerix chodatianus isolate HU tRNA-Leu (trnL) gene and trnL-trnF intergenic spacer, partial sequence; chloroplast.	Amico,G.C., Vidal-Russell,R. and Nickrent,D.L.	Am. J. Bot. 94 (4), 558-567 (2007)	Psittacantheae	Ligarinae	Tristerix	genomic DNA	Chloroplast	638	trnL/LF
Tristerix chodatianus	DQ442976	D.N. Smith, Valencia, & Gonzales 9536 3337838 (MO)	Tristerix chodatianus isolate HU 18S ribosomal RNA gene, partial sequence; internal transcribed spacer 1, 5.8S ribosomal RNA gene, and internal transcribed spacer 2, complete sequence; and 26S ribosomal RNA gene, partial sequence.	Amico,G.C., Vidal-Russell,R. and Nickrent,D.L.	Am. J. Bot. 94 (4), 558-567 (2007)	Psittacantheae	Ligarinae	Tristerix	genomic DNA	Nucleolus	673	ITS1; 5.8S; ITS2
Tristerix corymbosus	DQ333854	Calvin and Wilson CL03-02	Tristerix corymbosus internal transcribed spacer 1, partial sequence; 5.8S ribosomal RNA gene, complete sequence; and internal transcribed spacer 2, partial sequence.	Wilson,C.A. and Calvin,C.L.	Am. J. Bot. 93 (5), 787-796 (2006)	Psittacantheae	Ligarinae	Tristerix	genomic DNA	Nucleolus	559	ITS1; 5.8S; ITS2
Tristerix corymbosus	DQ340605	Calvin and Wilson CL03-02	Tristerix corymbosus tRNA-Leu (trnL) gene and trnL-trnF intergenic spacer, partial sequence; chloroplast.	Wilson,C.A. and Calvin,C.L.	Am. J. Bot. 93 (5), 787-796 (2006)	Psittacantheae	Ligarinae	Tristerix	genomic DNA	Chloroplast	669	trnL/LF
Tristerix corymbosus	DQ442945	G. Amico 80 (BRCU)	Tristerix corymbosus isolate CH atpB gene, partial sequence; atpB-rbcL intergenic spacer, complete sequence; and ribulose 1,5-bisphosphate carboxylase/oxygenase large subunit (rbcL) gene, partial cds; chloroplast.	Amico,G.C., Vidal-Russell,R. and Nickrent,D.L.	Am. J. Bot. 94 (4), 558-567 (2007)	Psittacantheae	Ligarinae	Tristerix	genomic DNA	Chloroplast	661	atpB-rbcL
Tristerix corymbosus	DQ442946	G. Amico 83 (BRCU)	Tristerix corymbosus isolate TA atpB gene, partial sequence; atpB-rbcL intergenic spacer, complete sequence; and ribulose 1,5-bisphosphate carboxylase/oxygenase large subunit (rbcL) gene, partial cds; chloroplast.	Amico,G.C., Vidal-Russell,R. and Nickrent,D.L.	Am. J. Bot. 94 (4), 558-567 (2007)	Psittacantheae	Ligarinae	Tristerix	genomic DNA	Chloroplast	661	atpB-rbcL
Tristerix corymbosus	DQ442947	G. Amico 84 (BRCU)	Tristerix corymbosus isolate LL atpB gene and atpB-rbcL intergenic spacer, partial sequence; chloroplast.	Amico,G.C., Vidal-Russell,R. and Nickrent,D.L.	Am. J. Bot. 94 (4), 558-567 (2007)	Psittacantheae	Ligarinae	Tristerix	genomic DNA	Chloroplast	619	atpB-rbcL
Tristerix corymbosus	DQ442948	G. Amico 96 (BRCU)	Tristerix corymbosus isolate LI atpB gene, partial sequence; atpB-rbcL intergenic spacer, complete sequence; and ribulose 1,5-bisphosphate carboxylase/oxygenase large subunit (rbcL) gene, partial cds; chloroplast.	Amico,G.C., Vidal-Russell,R. and Nickrent,D.L.	Am. J. Bot. 94 (4), 558-567 (2007)	Psittacantheae	Ligarinae	Tristerix	genomic DNA	Chloroplast	673	atpB-rbcL
Tristerix corymbosus	DQ442920	G. Amico 80 (BCRU)	Tristerix corymbosus isolate CH tRNA-Leu (trnL) gene and trnL-trnF intergenic spacer, partial sequence; chloroplast.	Amico,G.C., Vidal-Russell,R. and Nickrent,D.L.	Am. J. Bot. 94 (4), 558-567 (2007)	Psittacantheae	Ligarinae	Tristerix	genomic DNA	Chloroplast	639	trnL/LF
Tristerix corymbosus	DQ442921	G. Amico 83 (BCRU)	Tristerix corymbosus isolate TA tRNA-Leu (trnL) gene and trnL-trnF intergenic spacer, partial sequence; chloroplast.	Amico,G.C., Vidal-Russell,R. and Nickrent,D.L.	Am. J. Bot. 94 (4), 558-567 (2007)	Psittacantheae	Ligarinae	Tristerix	genomic DNA	Chloroplast	645	trnL/LF
Tristerix corymbosus	DQ442922	G. Amico 84 (BCRU)	Tristerix corymbosus isolate LL tRNA-Leu (trnL) gene and trnL-trnF intergenic spacer, partial sequence; chloroplast.	Amico,G.C., Vidal-Russell,R. and Nickrent,D.L.	Am. J. Bot. 94 (4), 558-567 (2007)	Psittacantheae	Ligarinae	Tristerix	genomic DNA	Chloroplast	615	trnL/LF
Tristerix corymbosus	DQ442923	G. Amico 96 (BCRU)	Tristerix corymbosus isolate LI tRNA-Leu (trnL) gene and trnL-trnF intergenic spacer, partial sequence; chloroplast.	Amico,G.C., Vidal-Russell,R. and Nickrent,D.L.	Am. J. Bot. 94 (4), 558-567 (2007)	Psittacantheae	Ligarinae	Tristerix	genomic DNA	Chloroplast	640	trnL/LF
Tristerix corymbosus	DQ442967	G. Amico 80 (BRCU)	Tristerix corymbosus isolate CH internal transcribed spacer 1, partial sequence; 5.8S ribosomal RNA gene and internal transcribed spacer 2, complete sequence; and 26S ribosomal RNA gene, partial sequence.	Amico,G.C., Vidal-Russell,R. and Nickrent,D.L.	Am. J. Bot. 94 (4), 558-567 (2007)	Psittacantheae	Ligarinae	Tristerix	genomic DNA	Nucleolus	575	ITS1; 5.8S; ITS2
Tristerix corymbosus	DQ442968	G. Amico 83 (BRCU)	Tristerix corymbosus isolate TA internal transcribed spacer 1, partial sequence; 5.8S ribosomal RNA gene and internal transcribed spacer 2, complete sequence; and 26S ribosomal RNA gene, partial sequence.	Amico,G.C., Vidal-Russell,R. and Nickrent,D.L.	Am. J. Bot. 94 (4), 558-567 (2007)	Psittacantheae	Ligarinae	Tristerix	genomic DNA	Nucleolus	642	ITS1; 5.8S; ITS2
Tristerix corymbosus	DQ442969	G. Amico 84 (BRCU)	Tristerix corymbosus isolate LL internal transcribed spacer 1, partial sequence; 5.8S ribosomal RNA gene and internal transcribed spacer 2, complete sequence; and 26S ribosomal RNA gene, partial sequence.	Amico,G.C., Vidal-Russell,R. and Nickrent,D.L.	Am. J. Bot. 94 (4), 558-567 (2007)	Psittacantheae	Ligarinae	Tristerix	genomic DNA	Nucleolus	657	ITS1; 5.8S; ITS2
Tristerix corymbosus	DQ442970	G. Amico 96 (BRCU)	Tristerix corymbosus isolate LI internal transcribed spacer 1, partial sequence; 5.8S ribosomal RNA gene and internal transcribed spacer 2, complete sequence; and 26S ribosomal RNA gene, partial sequence.	Amico,G.C., Vidal-Russell,R. and Nickrent,D.L.	Am. J. Bot. 94 (4), 558-567 (2007)	Psittacantheae	Ligarinae	Tristerix	genomic DNA	Nucleolus	493	ITS1; 5.8S; ITS2
Tristerix corymbosus	EF050531	UNKNOWN	Tristerix corymbosus isolate HC4509Sm atpB-rbcL intergenic spacer, partial sequence; and ribulose-1,5-bisphosphate carboxylase/oxygenase large subunit (rbcL) gene, partial cds; chloroplast.	Amico,G.C. and Nickrent,D.L.	Am. J. Bot. 96 (8), 1571-1580 (2009)	Psittacantheae	Ligarinae	Tristerix	genomic DNA	Chloroplast	673	atpB-rbcL
Tristerix corymbosus	EF050532	UNKNOWN	Tristerix corymbosus isolate HD4605EN atpB-rbcL intergenic spacer, partial sequence; and ribulose-1,5-bisphosphate carboxylase/oxygenase large subunit (rbcL) gene, partial cds; chloroplast.	Amico,G.C. and Nickrent,D.L.	Am. J. Bot. 96 (8), 1571-1580 (2009)	Psittacantheae	Ligarinae	Tristerix	genomic DNA	Chloroplast	655	atpB-rbcL
Tristerix corymbosus	EF050533	UNKNOWN	Tristerix corymbosus isolate HE4507HU atpB-rbcL intergenic spacer, partial sequence; and ribulose-1,5-bisphosphate carboxylase/oxygenase large subunit (rbcL) gene, partial cds; chloroplast.	Amico,G.C. and Nickrent,D.L.	Am. J. Bot. 96 (8), 1571-1580 (2009)	Psittacantheae	Ligarinae	Tristerix	genomic DNA	Chloroplast	654	atpB-rbcL
Tristerix corymbosus	EF050534	UNKNOWN	Tristerix corymbosus isolate HF4599NB atpB-rbcL intergenic spacer, partial sequence; and ribulose-1,5-bisphosphate carboxylase/oxygenase large subunit (rbcL) gene, partial cds; chloroplast.	Amico,G.C. and Nickrent,D.L.	Am. J. Bot. 96 (8), 1571-1580 (2009)	Psittacantheae	Ligarinae	Tristerix	genomic DNA	Chloroplast	605	atpB-rbcL
Tristerix corymbosus	EF050535	UNKNOWN	Tristerix corymbosus isolate H64572FJ atpB-rbcL intergenic spacer, partial sequence; and ribulose-1,5-bisphosphate carboxylase/oxygenase large subunit (rbcL) gene, partial cds; chloroplast.	Amico,G.C. and Nickrent,D.L.	Am. J. Bot. 96 (8), 1571-1580 (2009)	Psittacantheae	Ligarinae	Tristerix	genomic DNA	Chloroplast	667	atpB-rbcL
Tristerix corymbosus	EF464467	Nickrent 4129	Tristerix corymbosus 18S ribosomal RNA gene, partial sequence.	Vidal-Russell,R. and Nickrent,D.L.	Mol. Phylogenet. Evol. 47 (2), 523-537 (2008)	Psittacantheae	Ligarinae	Tristerix	genomic DNA	Nucleolus	1648	18S
Tristerix corymbosus	EF464479	Nickrent 4572	Tristerix corymbosus 26S ribosomal RNA gene, partial sequence.	Vidal-Russell,R. and Nickrent,D.L.	Mol. Phylogenet. Evol. 47 (2), 523-537 (2008)	Psittacantheae	Ligarinae	Tristerix	genomic DNA	Nucleolus	875	25S
Tristerix corymbosus	EF464493	Nickrent 4597A	Tristerix corymbosus tRNA-Leu (trnL) gene, partial sequence; trnL-trnF intergenic spacer, complete sequence; and tRNA-Phe (trnF) gene, partial sequence; chloroplast.	Vidal-Russell,R. and Nickrent,D.L.	Mol. Phylogenet. Evol. 47 (2), 523-537 (2008)	Psittacantheae	Ligarinae	Tristerix	genomic DNA	Chloroplast	707	trnL/LF
Tristerix corymbosus	EF464530	Nickrent 4575E	Tristerix corymbosus ribulose-1,5-bisphosphate carboxylase/oxygenase large subunit (rbcL) gene, partial cds; chloroplast.	Vidal-Russell,R. and Nickrent,D.L.	Mol. Phylogenet. Evol. 47 (2), 523-537 (2008)	Psittacantheae	Ligarinae	Tristerix	genomic DNA	Chloroplast	732	rbcL
Tristerix corymbosus	EF464512	Nickrent 4129	Tristerix corymbosus maturase K (matK) gene, partial cds; chloroplast.	Vidal-Russell,R. and Nickrent,D.L.	Mol. Phylogenet. Evol. 47 (2), 523-537 (2008)	Psittacantheae	Ligarinae	Tristerix	genomic DNA	Chloroplast	1137	matK
Tristerix grandiflorus	DQ442930	Palacios, Neil, & Ceron 2547 3672311 (MO)	Tristerix grandiflorus isolate CO tRNA-Leu (trnL) gene and trnL-trnF intergenic spacer, partial sequence; chloroplast.	Amico,G.C., Vidal-Russell,R. and Nickrent,D.L.	Am. J. Bot. 94 (4), 558-567 (2007)	Psittacantheae	Ligarinae	Tristerix	genomic DNA	Chloroplast	638	trnL/LF
Tristerix grandiflorus	DQ442931	V. Zar 1368 3907304 (MO)	Tristerix grandiflorus isolate SJ tRNA-Leu (trnL) gene and trnL-trnF intergenic spacer, partial sequence; chloroplast.	Amico,G.C., Vidal-Russell,R. and Nickrent,D.L.	Am. J. Bot. 94 (4), 558-567 (2007)	Psittacantheae	Ligarinae	Tristerix	genomic DNA	Chloroplast	610	trnL/LF
Tristerix grandiflorus	DQ442978	V. Zar 1368 3907304 (MO)	Tristerix grandiflorus isolate SJ internal transcribed spacer 1, partial sequence; 5.8S ribosomal RNA gene and internal transcribed spacer 2, complete sequence; and 26S ribosomal RNA gene, partial sequence.	Amico,G.C., Vidal-Russell,R. and Nickrent,D.L.	Am. J. Bot. 94 (4), 558-567 (2007)	Psittacantheae	Ligarinae	Tristerix	genomic DNA	Nucleolus	652	ITS1; 5.8S; ITS2
Tristerix grandiflorus	DQ442979	Palacios, Neil, & Ceron 2547 3672311 (MO)	Tristerix grandiflorus isolate CO internal transcribed spacer 1, partial sequence; 5.8S ribosomal RNA gene and internal transcribed spacer 2, complete sequence; and 26S ribosomal RNA gene, partial sequence.	Amico,G.C., Vidal-Russell,R. and Nickrent,D.L.	Am. J. Bot. 94 (4), 558-567 (2007)	Psittacantheae	Ligarinae	Tristerix	genomic DNA	Nucleolus	648	ITS1; 5.8S; ITS2
Tristerix longebracteatus	DQ442954	D. Fernandez, M. Cerna & P. Villacres 371 5889268 (MO)	Tristerix longebracteatus isolate PI atpB gene, partial sequence; atpB-rbcL intergenic spacer, complete sequence; and ribulose 1,5-bisphosphate carboxylase/oxygenase large subunit (rbcL) gene, partial cds; chloroplast.	Amico,G.C., Vidal-Russell,R. and Nickrent,D.L.	Am. J. Bot. 94 (4), 558-567 (2007)	Psittacantheae	Ligarinae	Tristerix	genomic DNA	Chloroplast	645	atpB-rbcL
Tristerix longebracteatus	DQ442955	D.N. Smith 8288 722877 (MO)	Tristerix longebracteatus isolate CA atpB gene, partial sequence; atpB-rbcL intergenic spacer, complete sequence; and ribulose 1,5-bisphosphate carboxylase/oxygenase large subunit (rbcL) gene, partial cds; chloroplast.	Amico,G.C., Vidal-Russell,R. and Nickrent,D.L.	Am. J. Bot. 94 (4), 558-567 (2007)	Psittacantheae	Ligarinae	Tristerix	genomic DNA	Chloroplast	652	atpB-rbcL
Tristerix longebracteatus	DQ442932	D.N. Smith 8288 722877 (MO)	Tristerix longebracteatus isolate CA tRNA-Leu (trnL) gene and trnL-trnF intergenic spacer, partial sequence; chloroplast.	Amico,G.C., Vidal-Russell,R. and Nickrent,D.L.	Am. J. Bot. 94 (4), 558-567 (2007)	Psittacantheae	Ligarinae	Tristerix	genomic DNA	Chloroplast	610	trnL/LF
Tristerix longebracteatus	DQ442933	D. Fernandez, M. Cerna & P. Villacres 371 5889268 (MO)	Tristerix longebracteatus isolate PI tRNA-Leu (trnL) gene and trnL-trnF intergenic spacer, partial sequence; chloroplast.	Amico,G.C., Vidal-Russell,R. and Nickrent,D.L.	Am. J. Bot. 94 (4), 558-567 (2007)	Psittacantheae	Ligarinae	Tristerix	genomic DNA	Chloroplast	650	trnL/LF
Tristerix longebracteatus	DQ442980	D. Fernandez, M. Cerna & P. Villacres 371 5889268 (MO)	Tristerix longebracteatus isolate PI internal transcribed spacer 1, partial sequence; 5.8S ribosomal RNA gene and internal transcribed spacer 2, complete sequence; and 26S ribosomal RNA gene, partial sequence.	Amico,G.C., Vidal-Russell,R. and Nickrent,D.L.	Am. J. Bot. 94 (4), 558-567 (2007)	Psittacantheae	Ligarinae	Tristerix	genomic DNA	Nucleolus	657	ITS1; 5.8S; ITS2
Tristerix longebracteatus	DQ442981	D.N. Smith 8288 722877 (MO)	Tristerix longebracteatus isolate CA internal transcribed spacer 1, partial sequence; 5.8S ribosomal RNA gene and internal transcribed spacer 2, complete sequence; and 26S ribosomal RNA gene, partial sequence.	Amico,G.C., Vidal-Russell,R. and Nickrent,D.L.	Am. J. Bot. 94 (4), 558-567 (2007)	Psittacantheae	Ligarinae	Tristerix	genomic DNA	Nucleolus	666	ITS1; 5.8S; ITS2
Tristerix penduliflorus	DQ442956	M. Lewis 35236 4661844 (MO)	Tristerix penduliflorus isolate IN atpB gene, partial sequence; atpB-rbcL intergenic spacer, complete sequence; and ribulose 1,5-bisphosphate carboxylase/oxygenase large subunit (rbcL) gene, partial cds; chloroplast.	Amico,G.C., Vidal-Russell,R. and Nickrent,D.L.	Am. J. Bot. 94 (4), 558-567 (2007)	Psittacantheae	Ligarinae	Tristerix	genomic DNA	Chloroplast	653	atpB-rbcL
Tristerix penduliflorus	DQ442957	P. Nunez 8288 720879 (MO)	Tristerix penduliflorus isolate MA atpB gene, partial sequence; atpB-rbcL intergenic spacer, complete sequence; and ribulose 1,5-bisphosphate carboxylase/oxygenase large subunit (rbcL) gene, partial cds; chloroplast.	Amico,G.C., Vidal-Russell,R. and Nickrent,D.L.	Am. J. Bot. 94 (4), 558-567 (2007)	Psittacantheae	Ligarinae	Tristerix	genomic DNA	Chloroplast	659	atpB-rbcL
Tristerix penduliflorus	DQ442928	M. Lewis 35236 4661844 (MO)	Tristerix penduliflorus isolate IN tRNA-Leu (trnL) gene and trnL-trnF intergenic spacer, partial sequence; chloroplast.	Amico,G.C., Vidal-Russell,R. and Nickrent,D.L.	Am. J. Bot. 94 (4), 558-567 (2007)	Psittacantheae	Ligarinae	Tristerix	genomic DNA	Chloroplast	628	trnL/LF
Tristerix penduliflorus	DQ442929	P. Nunez 8288 720879 (MO)	Tristerix penduliflorus isolate MA tRNA-Leu (trnL) gene and trnL-trnF intergenic spacer, partial sequence; chloroplast.	Amico,G.C., Vidal-Russell,R. and Nickrent,D.L.	Am. J. Bot. 94 (4), 558-567 (2007)	Psittacantheae	Ligarinae	Tristerix	genomic DNA	Chloroplast	624	trnL/LF
Tristerix penduliflorus	DQ442975	M. Lewis 35236 4661844 (MO)	Tristerix penduliflorus isolate IN internal transcribed spacer 2 and 26S ribosomal RNA gene, partial sequence.	Amico,G.C., Vidal-Russell,R. and Nickrent,D.L.	Am. J. Bot. 94 (4), 558-567 (2007)	Psittacantheae	Ligarinae	Tristerix	genomic DNA	Nucleolus	197	ITS1; 5.8S; ITS2
Tristerix peruvianus	DQ442958	D.N. Smith & M. Buddensiek 10858 3307944 (MO)	Tristerix peruvianus isolate HU atpB gene, partial sequence; atpB-rbcL intergenic spacer, complete sequence; and ribulose 1,5-bisphosphate carboxylase/oxygenase large subunit (rbcL) gene, partial cds; chloroplast.	Amico,G.C., Vidal-Russell,R. and Nickrent,D.L.	Am. J. Bot. 94 (4), 558-567 (2007)	Psittacantheae	Ligarinae	Tristerix	genomic DNA	Chloroplast	633	atpB-rbcL
Tristerix peruvianus	DQ442934	D.N. Smith & M. Buddensiek 10858 3307944 (MO)	Tristerix peruvianus isolate HU tRNA-Leu (trnL) gene and trnL-trnF intergenic spacer, partial sequence; chloroplast.	Amico,G.C., Vidal-Russell,R. and Nickrent,D.L.	Am. J. Bot. 94 (4), 558-567 (2007)	Psittacantheae	Ligarinae	Tristerix	genomic DNA	Chloroplast	648	trnL/LF
Tristerix peruvianus	DQ442977	D.N. Smith & M. Buddensiek 10858 3307944 (MO)	Tristerix peruvianus isolate HU internal transcribed spacer 1, partial sequence; 5.8S ribosomal RNA gene and internal transcribed spacer 2, complete sequence; and 26S ribosomal RNA gene, partial sequence.	Amico,G.C., Vidal-Russell,R. and Nickrent,D.L.	Am. J. Bot. 94 (4), 558-567 (2007)	Psittacantheae	Ligarinae	Tristerix	genomic DNA	Nucleolus	653	ITS1; 5.8S; ITS2
Tristerix peytonii	DQ442959	P. Nunez & J. Arque 8287 3632650 (MO)	Tristerix peytonii isolate CZ atpB gene, partial sequence; atpB-rbcL intergenic spacer, complete sequence; and ribulose 1,5-bisphosphate carboxylase/oxygenase large subunit (rbcL) gene, partial cds; chloroplast.	Amico,G.C., Vidal-Russell,R. and Nickrent,D.L.	Am. J. Bot. 94 (4), 558-567 (2007)	Psittacantheae	Ligarinae	Tristerix	genomic DNA	Chloroplast	611	atpB-rbcL
Tristerix peytonii	DQ442935	P. Nunez & J. Arque 8287 3632650 (MO)	Tristerix peytonii isolate CZ tRNA-Leu (trnL) gene and trnL-trnF intergenic spacer, partial sequence; chloroplast.	Amico,G.C., Vidal-Russell,R. and Nickrent,D.L.	Am. J. Bot. 94 (4), 558-567 (2007)	Psittacantheae	Ligarinae	Tristerix	genomic DNA	Chloroplast	479	trnL/LF
Tristerix peytonii	DQ442982	P. Nunez & J. Arque 8287 3632650 (MO)	Tristerix peytonii isolate CZ internal transcribed spacer 1, partial sequence; 5.8S ribosomal RNA gene and internal transcribed spacer 2, complete sequence; and 26S ribosomal RNA gene, partial sequence.	Amico,G.C., Vidal-Russell,R. and Nickrent,D.L.	Am. J. Bot. 94 (4), 558-567 (2007)	Psittacantheae	Ligarinae	Tristerix	genomic DNA	Nucleolus	404	ITS1; 5.8S; ITS2
Tristerix pubescens	DQ442960	D.N. Smith & M. Buddensiek 11090 3303268 (MO)	Tristerix pubescens isolate HU atpB gene, partial sequence; atpB-rbcL intergenic spacer, complete sequence; and ribulose 1,5-bisphosphate carboxylase/oxygenase large subunit (rbcL) gene, partial cds; chloroplast.	Amico,G.C., Vidal-Russell,R. and Nickrent,D.L.	Am. J. Bot. 94 (4), 558-567 (2007)	Psittacantheae	Ligarinae	Tristerix	genomic DNA	Chloroplast	580	atpB-rbcL
Tristerix pubescens	DQ442961	D.N. Smith 11388 3337809 (MO)	Tristerix pubescens isolate HU2 atpB gene, partial sequence; atpB-rbcL intergenic spacer, complete sequence; and ribulose 1,5-bisphosphate carboxylase/oxygenase large subunit (rbcL) gene, partial cds; chloroplast.	Amico,G.C., Vidal-Russell,R. and Nickrent,D.L.	Am. J. Bot. 94 (4), 558-567 (2007)	Psittacantheae	Ligarinae	Tristerix	genomic DNA	Chloroplast	573	atpB-rbcL
Tristerix pubescens	DQ442936	D.N. Smith & M. Buddensiek 11090 3303268 (MO)	Tristerix pubescens isolate HU tRNA-Leu (trnL) gene and trnL-trnF intergenic spacer, partial sequence; chloroplast.	Amico,G.C., Vidal-Russell,R. and Nickrent,D.L.	Am. J. Bot. 94 (4), 558-567 (2007)	Psittacantheae	Ligarinae	Tristerix	genomic DNA	Chloroplast	640	trnL/LF
Tristerix pubescens	DQ442937	D.N. Smith 11388 3337809 (MO)	Tristerix pubescens isolate HU2 tRNA-Leu (trnL) gene and trnL-trnF intergenic spacer, partial sequence; chloroplast.	Amico,G.C., Vidal-Russell,R. and Nickrent,D.L.	Am. J. Bot. 94 (4), 558-567 (2007)	Psittacantheae	Ligarinae	Tristerix	genomic DNA	Chloroplast	630	trnL/LF
Tristerix pubescens	DQ442983	D.N. Smith & M. Buddensiek 11090 3303268 (MO)	Tristerix pubescens isolate HU internal transcribed spacer 1, partial sequence; 5.8S ribosomal RNA gene and internal transcribed spacer 2, complete sequence; and 26S ribosomal RNA gene, partial sequence.	Amico,G.C., Vidal-Russell,R. and Nickrent,D.L.	Am. J. Bot. 94 (4), 558-567 (2007)	Psittacantheae	Ligarinae	Tristerix	genomic DNA	Nucleolus	535	ITS1; 5.8S; ITS2
Tristerix pubescens	DQ442984	D.N. Smith 11388 3337809 (MO)	Tristerix pubescens isolate HU2 18S ribosomal RNA gene, partial sequence; internal transcribed spacer 1, 5.8S ribosomal RNA gene, and internal transcribed spacer 2, complete sequence; and 26S ribosomal RNA gene, partial sequence.	Amico,G.C., Vidal-Russell,R. and Nickrent,D.L.	Am. J. Bot. 94 (4), 558-567 (2007)	Psittacantheae	Ligarinae	Tristerix	genomic DNA	Nucleolus	672	ITS1; 5.8S; ITS2
Tristerix verticillatus	DQ442949	G. Amico 154 (BRCU)	Tristerix verticillatus isolate AN atpB gene and atpB-rbcL intergenic spacer, partial sequence; chloroplast.	Amico,G.C., Vidal-Russell,R. and Nickrent,D.L.	Am. J. Bot. 94 (4), 558-567 (2007)	Psittacantheae	Ligarinae	Tristerix	genomic DNA	Chloroplast	615	atpB-rbcL
Tristerix verticillatus	DQ442950	G. Amico 157 (BRCU)	Tristerix verticillatus isolate CM atpB gene, partial sequence; atpB-rbcL intergenic spacer, complete sequence; and ribulose 1,5-bisphosphate carboxylase/oxygenase large subunit (rbcL) gene, partial cds; chloroplast.	Amico,G.C., Vidal-Russell,R. and Nickrent,D.L.	Am. J. Bot. 94 (4), 558-567 (2007)	Psittacantheae	Ligarinae	Tristerix	genomic DNA	Chloroplast	628	atpB-rbcL
Tristerix verticillatus	DQ442951	G. Amico 158 (BRCU)	Tristerix verticillatus isolate GV atpB gene, partial sequence; atpB-rbcL intergenic spacer, complete sequence; and ribulose 1,5-bisphosphate carboxylase/oxygenase large subunit (rbcL) gene, partial cds; chloroplast.	Amico,G.C., Vidal-Russell,R. and Nickrent,D.L.	Am. J. Bot. 94 (4), 558-567 (2007)	Psittacantheae	Ligarinae	Tristerix	genomic DNA	Chloroplast	627	atpB-rbcL
Tristerix verticillatus	DQ442952	G. Amico 155 (BRCU)	Tristerix verticillatus isolate PO atpB gene, partial sequence; atpB-rbcL intergenic spacer, complete sequence; and ribulose 1,5-bisphosphate carboxylase/oxygenase large subunit (rbcL) gene, partial cds; chloroplast.	Amico,G.C., Vidal-Russell,R. and Nickrent,D.L.	Am. J. Bot. 94 (4), 558-567 (2007)	Psittacantheae	Ligarinae	Tristerix	genomic DNA	Chloroplast	626	atpB-rbcL
Tristerix verticillatus	DQ442924	G. Amico 154 (BCRU)	Tristerix verticillatus isolate AN tRNA-Leu (trnL) gene and trnL-trnF intergenic spacer, partial sequence; chloroplast.	Amico,G.C., Vidal-Russell,R. and Nickrent,D.L.	Am. J. Bot. 94 (4), 558-567 (2007)	Psittacantheae	Ligarinae	Tristerix	genomic DNA	Chloroplast	671	trnL/LF
Tristerix verticillatus	DQ442925	G. Amico 157 (BCRU)	Tristerix verticillatus isolate CM tRNA-Leu (trnL) gene and trnL-trnF intergenic spacer, partial sequence; chloroplast.	Amico,G.C., Vidal-Russell,R. and Nickrent,D.L.	Am. J. Bot. 94 (4), 558-567 (2007)	Psittacantheae	Ligarinae	Tristerix	genomic DNA	Chloroplast	626	trnL/LF
Tristerix verticillatus	DQ442926	G. Amico 158 (BCRU)	Tristerix verticillatus isolate GV tRNA-Leu (trnL) gene and trnL-trnF intergenic spacer, partial sequence; chloroplast.	Amico,G.C., Vidal-Russell,R. and Nickrent,D.L.	Am. J. Bot. 94 (4), 558-567 (2007)	Psittacantheae	Ligarinae	Tristerix	genomic DNA	Chloroplast	671	trnL/LF
Tristerix verticillatus	DQ442927	G. Amico 155 (BCRU)	Tristerix verticillatus isolate PO tRNA-Leu (trnL) gene and trnL-trnF intergenic spacer, partial sequence; chloroplast.	Amico,G.C., Vidal-Russell,R. and Nickrent,D.L.	Am. J. Bot. 94 (4), 558-567 (2007)	Psittacantheae	Ligarinae	Tristerix	genomic DNA	Chloroplast	664	trnL/LF
Tristerix verticillatus	DQ442971	G. Amico 157 (BRCU)	Tristerix verticillatus isolate CM internal transcribed spacer 1, partial sequence; 5.8S ribosomal RNA gene and internal transcribed spacer 2, complete sequence; and 26S ribosomal RNA gene, partial sequence.	Amico,G.C., Vidal-Russell,R. and Nickrent,D.L.	Am. J. Bot. 94 (4), 558-567 (2007)	Psittacantheae	Ligarinae	Tristerix	genomic DNA	Nucleolus	666	ITS1; 5.8S; ITS2
Tristerix verticillatus	DQ442972	G. Amico 158 (BRCU)	Tristerix verticillatus isolate GV internal transcribed spacer 1, partial sequence; 5.8S ribosomal RNA gene and internal transcribed spacer 2, complete sequence; and 26S ribosomal RNA gene, partial sequence.	Amico,G.C., Vidal-Russell,R. and Nickrent,D.L.	Am. J. Bot. 94 (4), 558-567 (2007)	Psittacantheae	Ligarinae	Tristerix	genomic DNA	Nucleolus	658	ITS1; 5.8S; ITS2
Tristerix verticillatus	DQ442973	G. Amico 155 (BRCU)	Tristerix verticillatus isolate PO internal transcribed spacer 1, partial sequence; 5.8S ribosomal RNA gene and internal transcribed spacer 2, complete sequence; and 26S ribosomal RNA gene, partial sequence.	Amico,G.C., Vidal-Russell,R. and Nickrent,D.L.	Am. J. Bot. 94 (4), 558-567 (2007)	Psittacantheae	Ligarinae	Tristerix	genomic DNA	Nucleolus	644	ITS1; 5.8S; ITS2
Tristerix verticillatus	DQ442974	G. Amico 154 (BRCU)	Tristerix verticillatus isolate AN internal transcribed spacer 1, partial sequence; 5.8S ribosomal RNA gene and internal transcribed spacer 2, complete sequence; and 26S ribosomal RNA gene, partial sequence.	Amico,G.C., Vidal-Russell,R. and Nickrent,D.L.	Am. J. Bot. 94 (4), 558-567 (2007)	Psittacantheae	Ligarinae	Tristerix	genomic DNA	Nucleolus	666	ITS1; 5.8S; ITS2
Tupeia antarctica	L24425	UNKNOWN	Tupeia antarctica (Forst. f.) Chamb. and Schlecht. 18S ribosomal RNA gene, partial sequence.	Nickrent,D.L. and Duff,R.J.	(in) Moreno,M.T., Cubero,J.I., Berner,D., Joel,D., Musselman,L.J.	Psittacantheae	Tupeinae	Tupeia	genomic DNA	Nucleolus	1761	18S
Tupeia antarctica	DQ333850	Calvin and Wilson NZ98-02	Tupeia antarctica internal transcribed spacer 1, partial sequence; 5.8S ribosomal RNA gene, complete sequence; and internal transcribed spacer 2, partial sequence.	Wilson,C.A. and Calvin,C.L.	Am. J. Bot. 93 (5), 787-796 (2006)	Psittacantheae	Tupeinae	Tupeia	genomic DNA	Nucleolus	662	ITS1; 5.8S; ITS2
Tupeia antarctica	DQ340601	Calvin and Wilson NZ98-02	Tupeia antarctica tRNA-Leu (trnL) gene and trnL-trnF intergenic spacer, partial sequence; chloroplast.	Wilson,C.A. and Calvin,C.L.	Am. J. Bot. 93 (5), 787-796 (2006)	Psittacantheae	Tupeinae	Tupeia	genomic DNA	Chloroplast	628	trnL/LF
Tupeia antarctica	DQ790133	D. Nickrent 2742	Tupeia antarctica voucher D. Nickrent 2742 ribulose-1,5-bisphosphate carboxylase/oxygenase large subunit (rbcL) gene, partial cds; chloroplast.	Malecot,V. and Nickrent,D.L.	Syst. Bot. 33 (1), 97-106 (2008)	Psittacantheae	Tupeinae	Tupeia	genomic DNA	Chloroplast	1387	rbcL
Tupeia antarctica	DQ790172	D. Nickrent 2742	Tupeia antarctica voucher D. Nickrent 2742 maturase K (matK) gene, partial cds; chloroplast.	Malecot,V. and Nickrent,D.L.	Syst. Bot. 33 (1), 97-106 (2008)	Psittacantheae	Tupeinae	Tupeia	genomic DNA	Chloroplast	1255	matK
Tupeia antarctica	DQ790208	D. Nickrent 2742	Tupeia antarctica 26S ribosomal RNA gene gene, partial sequence.	Vidal-Russell,R. and Nickrent,D.L.	Mol. Phylogenet. Evol. 47 (2), 523-537 (2008)	Psittacantheae	Tupeinae	Tupeia	genomic DNA	Nucleolus	900	25S
Tupeia antarctica	EF464494	Nickrent 2742	Tupeia antarctica tRNA-Leu (trnL) gene, partial sequence; trnL-trnF intergenic spacer, complete sequence; and tRNA-Phe (trnF) gene, partial sequence; chloroplast.	Vidal-Russell,R. and Nickrent,D.L.	Mol. Phylogenet. Evol. 47 (2), 523-537 (2008)	Psittacantheae	Tupeinae	Tupeia	genomic DNA	Chloroplast	587	trnL/LF
Vanwykia remota	EU544351	Nickrent 4331	Vanwykia remota voucher Nickrent 4331 small subunit ribosomal RNA gene, partial sequence.	Vidal-Russell,R. and Nickrent,D.L.	Am. J. Bot. 95 (8), 1015-1029 (2008)	Lorantheae	Tapinanthinae	Vanwykia	genomic DNA	Nucleolus	1716	18S
Vanwykia remota	EU544407	Nickrent 4331	Vanwykia remota voucher Nickrent 4331 26S ribosomal RNA gene, partial sequence.	Vidal-Russell,R. and Nickrent,D.L.	Am. J. Bot. 95 (8), 1015-1029 (2008)	Lorantheae	Tapinanthinae	Vanwykia	genomic DNA	Nucleolus	2078	25S
Vanwykia remota	EU544463	Nickrent 4331	Vanwykia remota voucher Nickrent 4331 maturase K (matK) gene, partial cds; chloroplast.	Vidal-Russell,R. and Nickrent,D.L.	Am. J. Bot. 95 (8), 1015-1029 (2008)	Lorantheae	Tapinanthinae	Vanwykia	genomic DNA	Chloroplast	1381	matK
Vanwykia remota	EU544514	Nickrent 4331	Vanwykia remota voucher Nickrent 4331 tRNA-Leu (trnL) gene, partial sequence; trnL-trnF intergenic spacer, complete sequence; and tRNA-Phe (trnF) gene, partial sequence; chloroplast.	Vidal-Russell,R. and Nickrent,D.L.	Am. J. Bot. 95 (8), 1015-1029 (2008)	Lorantheae	Tapinanthinae	Vanwykia	genomic DNA	Chloroplast	593	trnL/LF
